# Supplementary material for: Physiological Mechanisms Underlying Tassel Symptom Formation in Maize Infected with Sporisorium reilianum
Source: MDPI journal article supplement (doi:10.3390/plants13020238), 2024-01-15
Supplement: s1 [file s1]

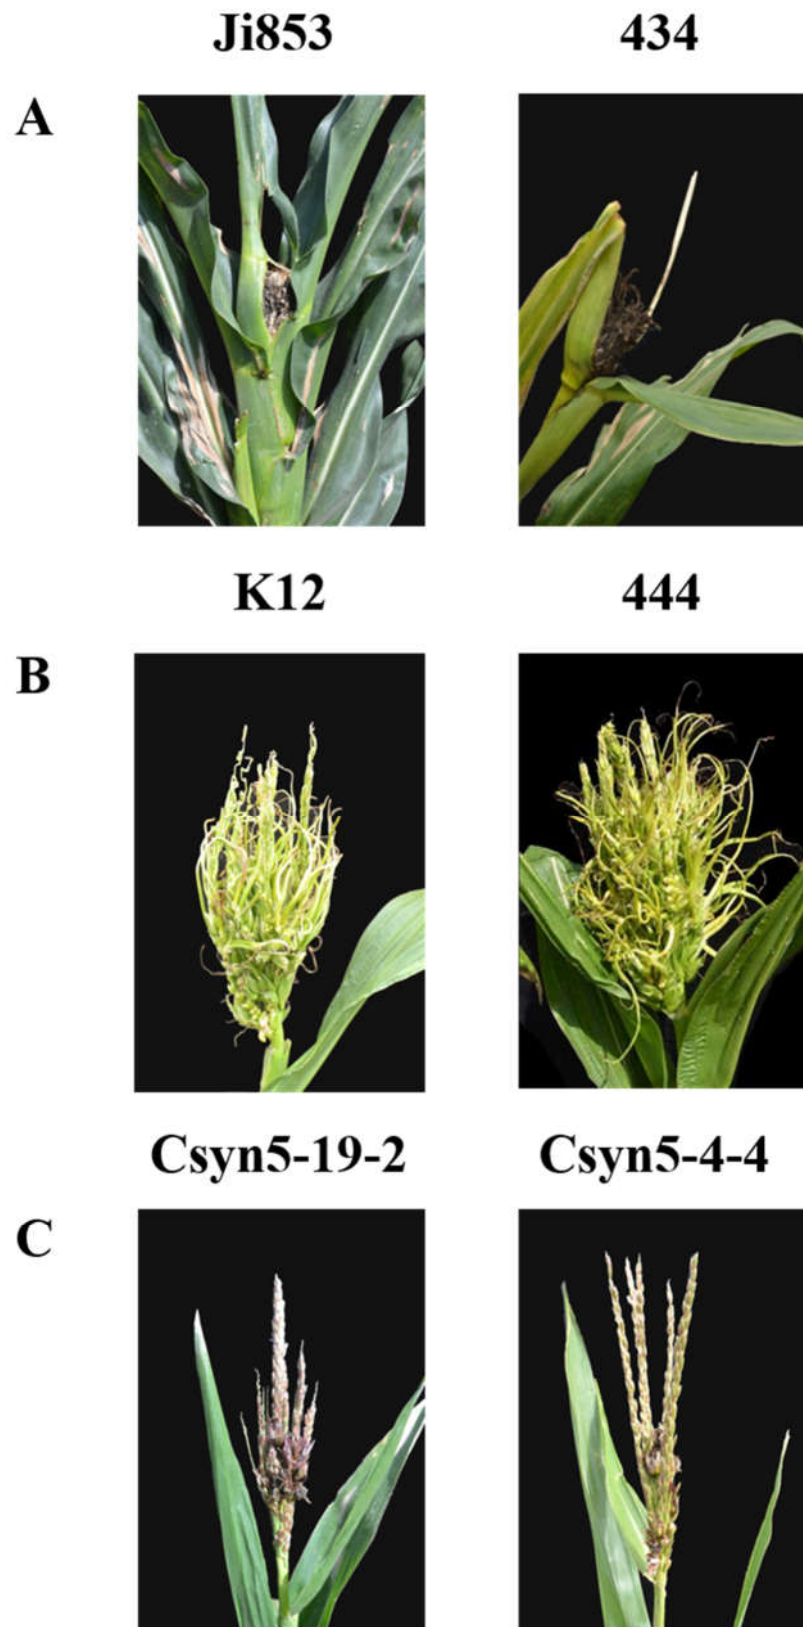

**Figure S1.** A、 B and C type symptoms of tassel of typical maize inbred lines infected with *S. reilianum*  
Note: the rows represent A、 B and C type and the columns represent the name of the inbred line.

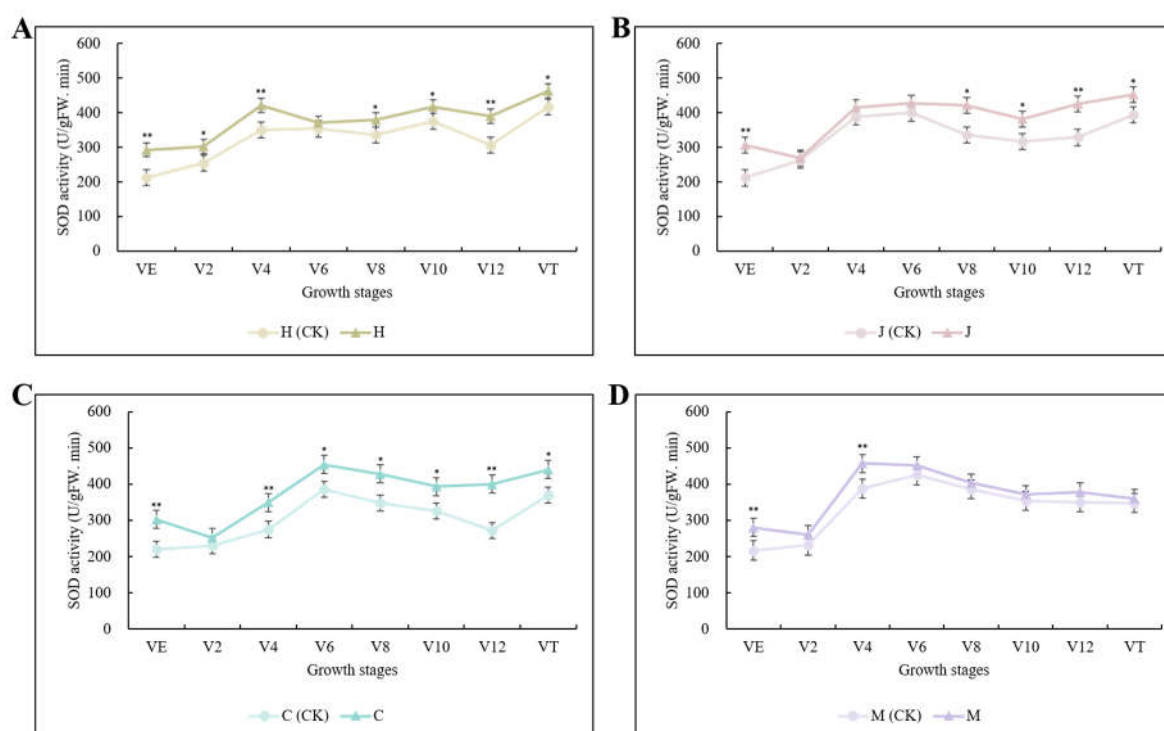

**Figure S2.** Changes of SOD activity in three typical maize inbred lines and disease-resistant control inbred line Mo17 at different growth stages Note: A: H (CK) indicate Huangzao4 uninoculated plants; H indicate Huangzao4 inoculated plants; B: J (CK) indicate Jing7 uninoculated plants; J indicate Jing7 inoculated plants; C: C (CK) indicate Chang7-2 uninoculated plants; C indicate Chang7-2 inoculated plants; D: M (CK) indicate Mo17 uninoculated plants; M indicate Mo17 inoculated plants; “\*” indicates  $p < 0.05$ ; “\*\*\*” indicates  $p < 0.01$ .

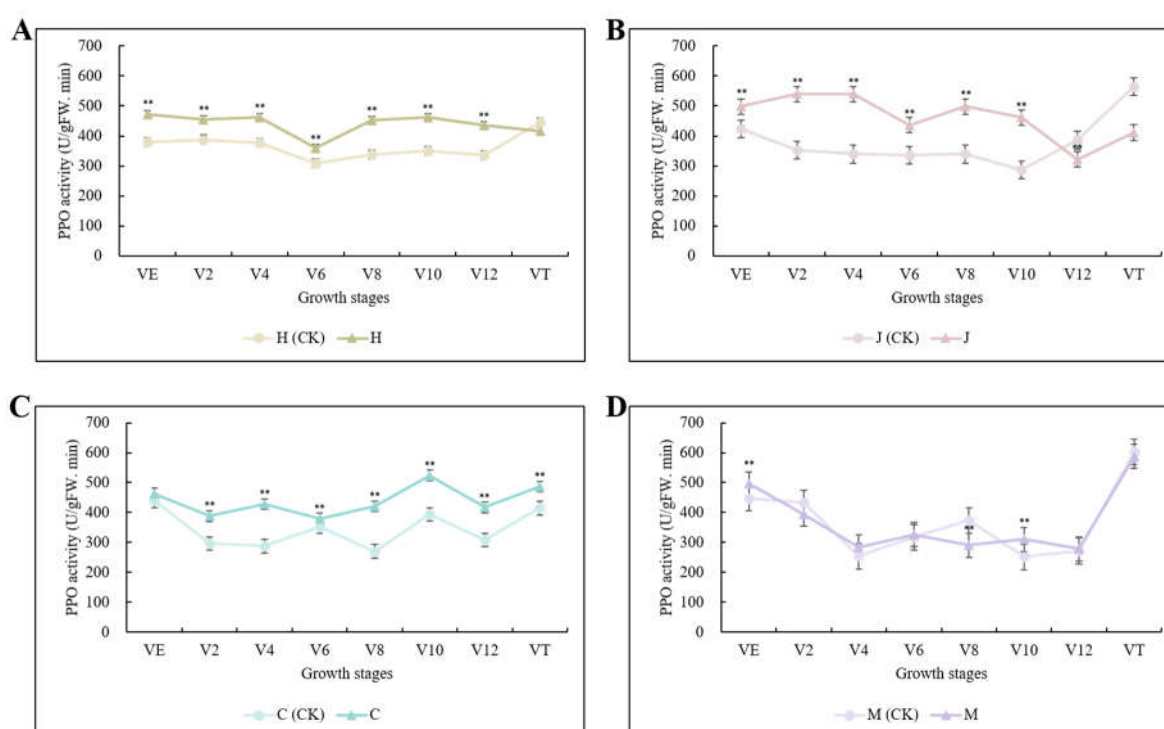

**Figure S3.** Changes of PPO activity in three typical maize inbred lines and disease-resistant control inbred line Mo17 at different growth stages Note: A: H (CK) indicate Huangzao4 uninoculated plants; H indicate Huangzao4 inoculated plants; B: J (CK) indicate Jing7 uninoculated plants; J indicate Jing7 inoculated plants; C: C (CK) indicate Chang7-2 uninoculated plants; C indicate Chang7-2 inoculated

plants; D: M (CK) indicate Mo17 uninoculated plants; M indicate Mo17 inoculated plants; “\*\*” indicates  $p < 0.01$ .

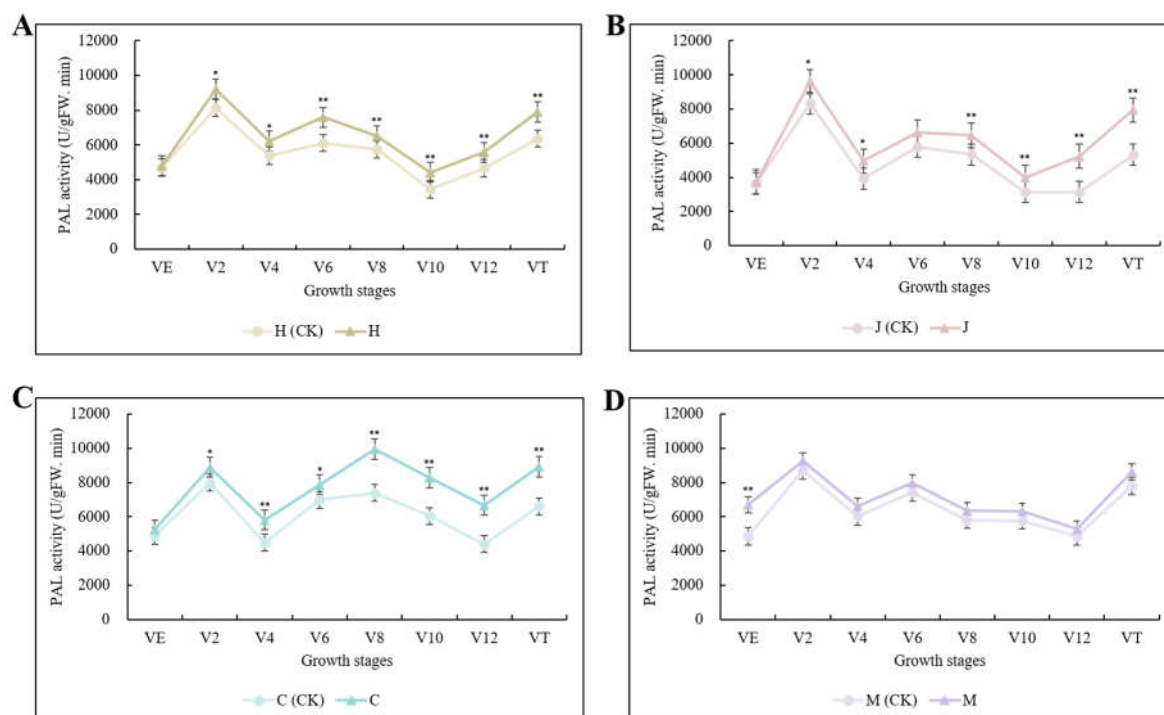

**Figure S4.** Changes of PAL activity in three typical maize inbred lines and disease-resistant control inbred line Mo17 at different growth stages Note: A: H (CK) indicate Huangzao4 uninoculated plants; H indicate Huangzao4 inoculated plants; B: J (CK) indicate Jing7 uninoculated plants; J indicate Jing7 inoculated plants; C: C (CK) indicate Chang7-2 uninoculated plants; C indicate Chang7-2 inoculated plants; D: M (CK) indicate Mo17 uninoculated plants; M indicate Mo17 inoculated plants; “\*” indicates  $p < 0.05$ ; “\*\*” indicates  $p < 0.01$ .

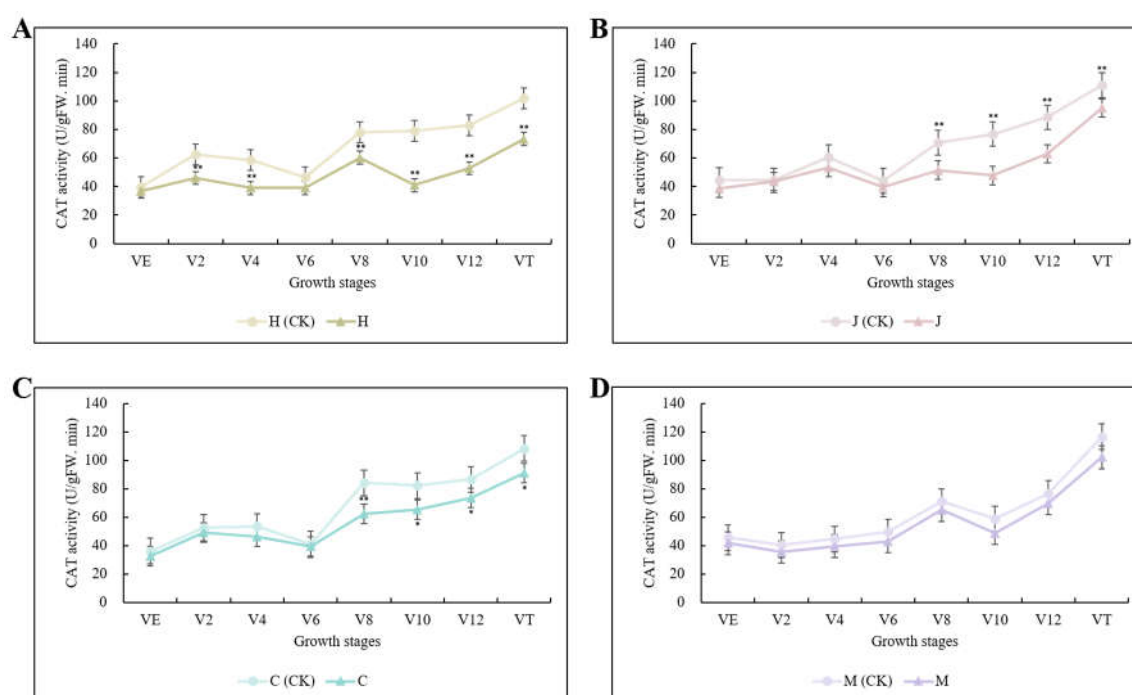

**Figure S5.** Changes of CAT activity in three typical maize inbred lines and disease-resistant control inbred line Mo17 at different growth stages Note: A: H (CK) indicate Huangzao4 uninoculated plants;

H indicate Huangzao4 inoculated plants; B: J (CK) indicate Jing7 uninoculated plants; J indicate Jing7 inoculated plants; C: C (CK) indicate Chang7-2 uninoculated plants; C indicate Chang7-2 inoculated plants; D: M (CK) indicate Mo17 uninoculated plants; M indicate Mo17 inoculated plants; “\*” indicates  $p<0.05$ ; “\*\*” indicates  $p<0.01$ .
