# Supplementary material for: Physiological Mechanisms Underlying Tassel Symptom Formation in Maize Infected with Sporisorium reilianum
Source: Plants (Basel). 2024 Jan 15;13(2):238. doi: 10.3390/plants13020238 (PMC10820020; doi:10.3390/plants13020238)
Supplement: Supplementary file 1 [file plants-13-00238-s001.zip]

Archive with 7 entries (7 files):
- AB.xls
- AB_report.xlsx
- AC.xls
- AC_report.xlsx
- BC.xls
- BC_report.xlsx
- plants-2732331-supplementary-figures.pdf
