# Supplementary material for: Physiological Mechanisms Underlying Tassel Symptom Formation in Maize Infected with Sporisorium reilianum
Source: Plants (Basel). 2024 Jan 15;13(2):238. doi: 10.3390/plants13020238 (PMC10820020; doi:10.3390/plants13020238)
Supplement: Supplementary file 1 [file plants-13-00238-s001.zip › AB.xls]

## Sheet: perseus-result
Significant	Difference	-log（P-value）	Protein IDs	Majority protein IDs	Symbol color	Symbol type	Symbol size	Only identified by site	Reverse	Potential contaminant	t-test Significant	Q-value	Score	Intensity	MS/MS Count	-Log t-test p-value	t-test Difference	A1	A2	A3	B1	B2	B3
	0.0322394	0.465352	sp|A1Y2B7|SGS3_MAIZE	sp|A1Y2B7|SGS3_MAIZE	Color [DarkGray]	1	4					0	48.808	2203900000	36	0.465352	0.0322394	0.119617	0.208347	0.175388	0.131162	0.111908	0.163564
	-0.0117379	0.93368	sp|A4KA61|PRO12_MAIZE;sp|P35083|PROF3_MAIZE;sp|P35082|PROF2_MAIZE;sp|P35081|PROF1_MAIZE;sp|A4KA60|PRO11_MAIZE;sp|A4KA59|PRO10_MAIZE;sp|A4KA58|PROF9_MAIZE;sp|A4KA57|PROF8_MAIZE;sp|A4KA56|PROF7_MAIZE;sp|A4KA55|PROF6_MAIZE	sp|A4KA61|PRO12_MAIZE;sp|P35083|PROF3_MAIZE;sp|P35082|PROF2_MAIZE;sp|P35081|PROF1_MAIZE;sp|A4KA60|PRO11_MAIZE;sp|A4KA59|PRO10_MAIZE;sp|A4KA58|PROF9_MAIZE;sp|A4KA57|PROF8_MAIZE;sp|A4KA56|PROF7_MAIZE;sp|A4KA55|PROF6_MAIZE	Color [DarkGray]	1	4					0	13.828	94735000	1	0.93368	-0.0117379	0	0	0	0	0.0181525	0.0170613
	-0.0491991	0.626388	sp|A5H8G4|PER1_MAIZE;sp|A5H454|PER66_MAIZE	sp|A5H8G4|PER1_MAIZE	Color [DarkGray]	1	4					0	6.221	1197300000	19	0.626388	-0.0491991	0.0198793	0.0804635	0.0575754	0.0406131	0.133639	0.131264
	-0.0253594	0.259805	sp|B1P123|BX7_MAIZE	sp|B1P123|BX7_MAIZE	Color [DarkGray]	1	4					0	83.381	4739700000	46	0.259805	-0.0253594	0.306174	0.380386	0.261087	0.306598	0.360836	0.356291
	0.00480644	0.948084	sp|B2LXS7|WHY1_MAIZE	sp|B2LXS7|WHY1_MAIZE	Color [DarkGray]	1	4					0	12.108	240490000	4	0.948084	0.00480644	0.0238859	0.0158992	0.0198838	0.0142445	0.0148649	0.0161403
+	-0.00498792	3.10281	sp|B4F9A4|DMAS1_MAIZE	sp|B4F9A4|DMAS1_MAIZE	Color [DarkGray]	1	4				+	0	29.682	137280000	2	3.10281	-0.00498792	0.00772413	0.00690124	0.00671419	0.0114672	0.0129657	0.0118704
	-0.0138512	1.14614	sp|B4FBQ7|CSPL6_MAIZE	sp|B4FBQ7|CSPL6_MAIZE	Color [DarkGray]	1	4					0	47.062	313190000	4	1.14614	-0.0138512	0.0188317	0.0208028	0.00428713	0.0256899	0.0329988	0.0267866
	0.0044263	0.0698346	sp|B4FHF0|EFTS_MAIZE	sp|B4FHF0|EFTS_MAIZE	Color [DarkGray]	1	4					0	5.4859	489830000	5	0.0698346	0.0044263	0.0707688	0.0252029	0.0270785	0.0693824	0.0218366	0.0185523
	0.527993	1.77297	sp|B4G072|BX9_MAIZE;sp|P80623|UC17_MAIZE	sp|B4G072|BX9_MAIZE	Color [DarkGray]	1	4				+	0	199.51	23757000000	111	1.77297	0.527993	1.80975	1.97018	2.04616	1.32311	1.27803	1.64096
	-0.108827	1.72053	sp|B4G0F3|MTBC_MAIZE	sp|B4G0F3|MTBC_MAIZE	Color [DarkGray]	1	4				+	0	45.283	4312400000	54	1.72053	-0.108827	0.21904	0.298751	0.214781	0.355734	0.337095	0.366223
	9.687e-05	0.0174903	sp|B6SHG7|TRMB_MAIZE	sp|B6SHG7|TRMB_MAIZE	Color [DarkGray]	1	4					0	1.8804	13460000	2	0.0174903	9.687e-05	0.00404479	0	0	0.00375418	0	0
	0.0192964	0.359856	sp|B6TB21|DRE2_MAIZE	sp|B6TB21|DRE2_MAIZE	Color [DarkGray]	1	4					0	41.288	1302100000	15	0.359856	0.0192964	0.0656256	0.119877	0.107943	0.0507816	0.0819453	0.10283
	0.0539212	0.310875	sp|B6TNW8|ITPA_MAIZE	sp|B6TNW8|ITPA_MAIZE	Color [DarkGray]	1	4					0	10.218	712190000	13	0.310875	0.0539212	0.229897	0.024145	0.0187837	0.0641995	0.0230137	0.0238485
	-0.0399688	0.513079	sp|B6TTW1|CYNS_MAIZE	sp|B6TTW1|CYNS_MAIZE	Color [DarkGray]	1	4					0	23.851	972570000	10	0.513079	-0.0399688	0.0181042	0.083369	0.0233122	0.0288832	0.118011	0.0977977
	-0.045847	0.487499	sp|B6TZD1|MTNA_MAIZE	sp|B6TZD1|MTNA_MAIZE	Color [DarkGray]	1	4					0	97.811	3729800000	47	0.487499	-0.045847	0.178592	0.284401	0.23042	0.222593	0.307325	0.301037
+	-0.0354568	2.3349	sp|C0PF72|ARGJ_MAIZE	sp|C0PF72|ARGJ_MAIZE	Color [DarkGray]	1	4				+	0	52.349	892910000	15	2.3349	-0.0354568	0.0538259	0.0427605	0.0380752	0.0739276	0.0879128	0.0791918
	-0.0293389	0.935012	sp|C0PN26|LISC2_MAIZE	sp|C0PN26|LISC2_MAIZE	Color [DarkGray]	1	4					0	45.539	236560000	4	0.935012	-0.0293389	0	0	0	0	0.0443582	0.0436586
	0.0273429	0.460736	sp|F4IHS2|SYD_ARATH	sp|F4IHS2|SYD_ARATH	Color [DarkGray]	1	4					0	1.6123	368080000	3	0.460736	0.0273429	0.0392063	0.0785912	0	0.0357688	0	0
	0.0064625	0.0447737	sp|F4JRJ6|DEAH9_ARATH	sp|F4JRJ6|DEAH9_ARATH	Color [DarkGray]	1	4					0.0068729	0.97349	675510000	3	0.0447737	0.0064625	0.13299	0.0213819	0.0271419	0.120771	0.0225926	0.0187625
	0.00278783	0.427243	sp|K7U9N8|OP1_MAIZE	sp|K7U9N8|OP1_MAIZE	Color [DarkGray]	1	4					0	3.2711	19006000	2	0.427243	0.00278783	0	0	0.00836348	0	0	0
	0.459991	1.58762	sp|O22424|RS4_MAIZE	sp|O22424|RS4_MAIZE	Color [DarkGray]	1	4				+	0	120.03	34046000000	114	1.58762	0.459991	2.46529	2.8138	2.58112	2.03045	2.13027	2.31952
	-0.151358	0.838135	sp|Q9FR39|PROF5_MAIZE;sp|O22655|PROF4_MAIZE	sp|Q9FR39|PROF5_MAIZE;sp|O22655|PROF4_MAIZE	Color [DarkGray]	1	4					0	54.63	10618000000	39	0.838135	-0.151358	0.832786	0.582984	0.651837	0.911517	0.779776	0.830388
	0.0458304	0.922273	sp|Q9LZQ9|DEAH2_ARATH;sp|O22899|PRP43_ARATH	sp|Q9LZQ9|DEAH2_ARATH;sp|O22899|PRP43_ARATH	Color [DarkGray]	1	4					0	2.1813	476850000	7	0.922273	0.0458304	0.0544872	0.0216323	0.101624	0.0133177	0.0138803	0.0130541
	0.0476526	0.633995	sp|O23813|SIR_MAIZE	sp|O23813|SIR_MAIZE	Color [DarkGray]	1	4					0	109.29	3622100000	34	0.633995	0.0476526	0.317225	0.270906	0.268753	0.293286	0.230287	0.190353
	-0.0159062	0.160695	sp|O24413|RLA3_MAIZE	sp|O24413|RLA3_MAIZE	Color [DarkGray]	1	4					0	163.57	6285200000	17	0.160695	-0.0159062	0.475348	0.458734	0.382227	0.499727	0.444617	0.419683
	-0.00294663	0.149779	sp|O24415|RLA2B_MAIZE	sp|O24415|RLA2B_MAIZE	Color [DarkGray]	1	4					0	4.4568	53868000	2	0.149779	-0.00294663	0.0104918	0	0	0.0193317	0	0
	0.0267553	0.773009	sp|O24562|CADH_MAIZE	sp|O24562|CADH_MAIZE	Color [DarkGray]	1	4					0	189.47	2475200000	30	0.773009	0.0267553	0.181189	0.201035	0.176735	0.137302	0.18565	0.155741
	0.147139	0.270353	sp|O24573|RLA0_MAIZE	sp|O24573|RLA0_MAIZE	Color [DarkGray]	1	4					0	123.63	18697000000	58	0.270353	0.147139	1.8145	1.23254	1.2749	1.51327	1.15218	1.21506
	-0.00806978	0.0206698	sp|O24578|PURA_MAIZE	sp|O24578|PURA_MAIZE	Color [DarkGray]	1	4					0	244.83	5438800000	52	0.0206698	-0.00806978	0.446754	0.371238	0.373338	0.66052	0.271249	0.283771
	-0.00543981	0.375625	sp|O24581|BIP3_MAIZE	sp|O24581|BIP3_MAIZE	Color [DarkGray]	1	4					0	3.2737	91334000	3	0.375625	-0.00543981	0.00199716	0.00361893	0.00406851	0.00571235	0.0202917	0
	0.12559	0.245622	sp|Q9M4U4|HDT3_MAIZE;sp|O24591|HDT1_MAIZE	sp|Q9M4U4|HDT3_MAIZE;sp|O24591|HDT1_MAIZE	Color [DarkGray]	1	4					0	126.11	5584700000	55	0.245622	0.12559	0.833389	0.366928	0.287393	0.587129	0.279509	0.244302
	0.0604358	0.108039	sp|O48556|IPYR_MAIZE	sp|O48556|IPYR_MAIZE	Color [DarkGray]	1	4					0	122.94	8755400000	54	0.108039	0.0604358	0.357224	0.841587	0.629351	0.259592	0.666497	0.720766
	0.000776807	0.00137978	sp|O48557|RL17_MAIZE	sp|O48557|RL17_MAIZE	Color [DarkGray]	1	4					0	153.66	12771000000	68	0.00137978	0.000776807	1.04691	0.624215	1.10495	0.864699	0.782312	1.12673
	0.0462948	0.3039	sp|O48558|RL30_MAIZE	sp|O48558|RL30_MAIZE	Color [DarkGray]	1	4					0	63.882	3554200000	31	0.3039	0.0462948	0.160453	0.322588	0.305633	0.147713	0.245657	0.256418
+	-0.128214	4.64219	sp|O64411|PAO_MAIZE	sp|O64411|PAO_MAIZE	Color [DarkGray]	1	4				+	0	84.111	1463600000	23	4.64219	-0.128214	0.041895	0.0344157	0.0369699	0.174823	0.156694	0.166404
	-0.147321	0.92987	sp|O64964|TIP11_MAIZE	sp|O64964|TIP11_MAIZE	Color [DarkGray]	1	4					0	35.835	5375700000	9	0.92987	-0.147321	0.191898	0.355674	0.31824	0.331242	0.51772	0.458814
	-0.0012729	0.427243	sp|O65101|PSAH_MAIZE	sp|O65101|PSAH_MAIZE	Color [DarkGray]	1	4					0	6.6447	10693000	1	0.427243	-0.0012729	0	0	0	0	0.00381871	0
	-0.00262125	0.186834	sp|O65107|PSAN_MAIZE	sp|O65107|PSAN_MAIZE	Color [DarkGray]	1	4					0	1.6362	454090000	2	0.186834	-0.00262125	0.0226222	0.0379826	0.0281364	0.0263909	0.0356497	0.0345644
	0.0126534	0.224722	sp|O81395|DRTS_MAIZE	sp|O81395|DRTS_MAIZE	Color [DarkGray]	1	4					0	12.825	855720000	13	0.224722	0.0126534	0.106585	0.0562912	0.0500902	0.0836152	0.0493293	0.0420615
	0.0008232	0.0300496	sp|O81482|IF4E2_MAIZE	sp|O81482|IF4E2_MAIZE	Color [DarkGray]	1	4					0	54.014	609740000	16	0.0300496	0.0008232	0.0378696	0.036084	0.0546271	0.0282085	0.0515899	0.0463127
	-0.231518	1.39284	sp|O82106|ZM33_MAIZE	sp|O82106|ZM33_MAIZE	Color [DarkGray]	1	4				+	0	58.226	2176500000	35	1.39284	-0.231518	0.0774554	0.0289936	0.025545	0.426007	0.186168	0.214372
	0.0732807	0.385509	sp|P00056|CYC_MAIZE	sp|P00056|CYC_MAIZE	Color [DarkGray]	1	4					0	9.4479	2384000000	7	0.385509	0.0732807	0.272854	0.189578	0.16804	0.159537	0.251093	0
+	0.454469	3.03119	sp|P00333|ADH1_MAIZE	sp|P00333|ADH1_MAIZE	Color [DarkGray]	1	4				+	0	99.76	7119800000	47	3.03119	0.454469	0.651772	0.731881	0.824246	0.309796	0.26787	0.266825
	0.0511811	0.489347	sp|P00412|COX2_MAIZE	sp|P00412|COX2_MAIZE	Color [DarkGray]	1	4					0	28.024	2577500000	19	0.489347	0.0511811	0.293363	0.182835	0.17567	0.215785	0.136646	0.145894
	-0.0347215	0.0778167	sp|P00827|ATPB_MAIZE	sp|P00827|ATPB_MAIZE	Color [DarkGray]	1	4					0	309.65	6645500000	73	0.0778167	-0.0347215	0.616638	0.53695	0.248092	0.72151	0.373978	0.410356
	-0.199031	1.74646	sp|P00874|RBL_MAIZE	sp|P00874|RBL_MAIZE	Color [DarkGray]	1	4				+	0	128.67	4207600000	46	1.74646	-0.199031	0.159864	0.268702	0.126816	0.327572	0.414548	0.410356
	0.0133447	0.879376	sp|P02355|RR4_MAIZE	sp|P02355|RR4_MAIZE	Color [DarkGray]	1	4					0	2.1109	462280000	2	0.879376	0.0133447	0.0357994	0.0519971	0.0281474	0.0244089	0.0267238	0.0247772
	-0.329923	0.737361	sp|P02582|ACT1_MAIZE	sp|P02582|ACT1_MAIZE	Color [DarkGray]	1	4					0	104.9	23683000000	72	0.737361	-0.329923	1.38686	1.7532	1.29879	1.68698	1.63223	2.10941
	0.000329942	0.0133964	sp|P04707|ADH2_MAIZE	sp|P04707|ADH2_MAIZE	Color [DarkGray]	1	4					0.0068966	0.97395	59679000	1	0.0133964	0.000329942	0.0177635	0	0	0.0167737	0	0
	-0.0426234	0.0608007	sp|P04709|ADT1_MAIZE	sp|P04709|ADT1_MAIZE	Color [DarkGray]	1	4					0	32.681	31489000000	75	0.0608007	-0.0426234	1.99723	2.31808	2.17184	1.81969	2.59817	2.19715
	0.00395252	0.788422	sp|P04711|CAPP1_MAIZE	sp|P04711|CAPP1_MAIZE	Color [DarkGray]	1	4					0	4.1279	233340000	6	0.788422	0.00395252	0.0156772	0.0203806	0.018378	0.0109727	0.0141556	0.0174498
	0.136584	1.16791	sp|P04712|SUS1_MAIZE	sp|P04712|SUS1_MAIZE	Color [DarkGray]	1	4					0	297.45	20083000000	128	1.16791	0.136584	1.47642	1.46034	1.54975	1.45309	1.29964	1.32402
	0.0133153	1.15844	sp|P04713|SSG1_MAIZE	sp|P04713|SSG1_MAIZE	Color [DarkGray]	1	4					0	2.589	208820000	2	1.15844	0.0133153	0.0149462	0.0249146	0.0225778	0	0.00696746	0.0155251
+	-0.531769	3.29129	sp|P04907|GSTF3_MAIZE	sp|P04907|GSTF3_MAIZE	Color [DarkGray]	1	4				+	0	60.236	15712000000	61	3.29129	-0.531769	0.83292	0.7894	0.89923	1.4499	1.31107	1.35589
	-0.0131048	1.80237	sp|P04967|PSAB_MAIZE	sp|P04967|PSAB_MAIZE	Color [DarkGray]	1	4				+	0	5.673	182680000	3	1.80237	-0.0131048	0.00433414	0.00779199	0.00468383	0.0125863	0.0219352	0.0216028
	-0.0794611	1.10537	sp|P05022|ATPA_MAIZE	sp|P05022|ATPA_MAIZE	Color [DarkGray]	1	4					0	54.818	3291400000	28	1.10537	-0.0794611	0.186731	0.189864	0.186156	0.201522	0.314093	0.28552
	-0.0352525	0.697996	sp|P05348|RBS_MAIZE	sp|P05348|RBS_MAIZE	Color [DarkGray]	1	4					0	15.953	704760000	11	0.697996	-0.0352525	0.0144757	0.0357879	0.044418	0.0991539	0.0744743	0.0268111
	0.381394	0.489728	sp|P05494|ATPAM_MAIZE	sp|P05494|ATPAM_MAIZE	Color [DarkGray]	1	4					0	178.63	58423000000	173	0.489728	0.381394	5.01031	3.99932	4.10187	3.822	4.19369	3.95162
	-0.0582107	1.61277	sp|P05641|PSBB_MAIZE	sp|P05641|PSBB_MAIZE	Color [DarkGray]	1	4				+	0	13.261	650460000	8	1.61277	-0.0582107	0.0160078	0.0165876	0.0150108	0.0859789	0.0948195	0.0414398
	-0.000392114	0.0504138	sp|P06588|RR19_MAIZE	sp|P06588|RR19_MAIZE	Color [DarkGray]	1	4					0.0068259	0.93834	58683000	2	0.0504138	-0.000392114	0	0.00638561	0.00379648	0	0.00626357	0.00509487
+	-0.0574678	2.10248	sp|P06671|CB22_MAIZE	sp|P06671|CB22_MAIZE	Color [DarkGray]	1	4				+	0	7.6687	623790000	5	2.10248	-0.0574678	0	0.0186948	0.018055	0.0499945	0.0775848	0.0815738
	-0.761244	0.451957	sp|P08440|ALF_MAIZE	sp|P08440|ALF_MAIZE	Color [DarkGray]	1	4					0	323.31	127850000000	294	0.451957	-0.761244	7.47647	9.77881	8.27239	9.0929	8.92591	9.79259
	-0.000459797	0.067045	sp|P08529|RK14_MAIZE	sp|P08529|RK14_MAIZE	Color [DarkGray]	1	4					0	1.4921	17777000	2	0.067045	-0.000459797	0.00433803	0	0	0.00571742	0	0
	0.234709	0.272607	sp|P08735|G3PC1_MAIZE	sp|P08735|G3PC1_MAIZE	Color [DarkGray]	1	4					0	242.77	45971000000	61	0.272607	0.234709	3.00337	3.37741	3.57245	2.4874	3.46848	3.29323
	0.00300525	0.161479	sp|P09004|MI25_MAIZE	sp|P09004|MI25_MAIZE	Color [DarkGray]	1	4					0	23.565	589630000	9	0.161479	0.00300525	0.0341294	0.0466236	0.0461826	0.0380221	0.0497043	0.0301934
	-0.0235843	0.0993215	sp|P09233|SODM1_MAIZE;sp|P41979|SODM3_MAIZE	sp|P09233|SODM1_MAIZE;sp|P41979|SODM3_MAIZE	Color [DarkGray]	1	4					0	314.75	5975700000	53	0.0993215	-0.0235843	0.274775	0.479694	0.423305	0.298864	0.49015	0.459514
	0.0255996	0.578332	sp|P09315|G3PA_MAIZE	sp|P09315|G3PA_MAIZE	Color [DarkGray]	1	4					0	41.734	1359300000	14	0.578332	0.0255996	0.140527	0.0966299	0.0940902	0.0595227	0.0997585	0.0951669
	-0.0112761	0.831473	sp|P0C1M0|ATPG_MAIZE	sp|P0C1M0|ATPG_MAIZE	Color [DarkGray]	1	4					0	2.6249	274470000	3	0.831473	-0.0112761	0	0.0200841	0.0172048	0.0238005	0.024485	0.0228319
	-0.00137256	0.180313	sp|P25891|RIP3_MAIZE;sp|P28522|RIPX_MAIZE;sp|P10593|ALB3_MAIZE;sp|P25892|RIP9_MAIZE	sp|P25891|RIP3_MAIZE;sp|P28522|RIPX_MAIZE;sp|P10593|ALB3_MAIZE;sp|P25892|RIP9_MAIZE	Color [DarkGray]	1	4					0	1.1325	21072000	1	0.180313	-0.00137256	0.0037286	0	0	0.00784626	0	0
	0.00840521	0.0741422	sp|P10979|GRPA_MAIZE	sp|P10979|GRPA_MAIZE	Color [DarkGray]	1	4					0	51.693	2840600000	24	0.0741422	0.00840521	0.152843	0.261644	0.175965	0.146256	0.221037	0.197942
	-1.61416	1.38603	sp|P11143|HSP70_MAIZE	sp|P11143|HSP70_MAIZE	Color [DarkGray]	1	4				+	0	323.31	96848000000	260	1.38603	-1.61416	5.40481	6.46525	5.8297	6.62696	8.06061	7.85467
+	-0.0781003	2.46165	sp|P11428|SODC2_MAIZE	sp|P11428|SODC2_MAIZE	Color [DarkGray]	1	4				+	0	6.0438	1539300000	8	2.46165	-0.0781003	0.0516532	0.058996	0.0923872	0.144216	0.148506	0.144616
	-0.00813875	1.06193	sp|P11601|PSAC_MAIZE	sp|P11601|PSAC_MAIZE	Color [DarkGray]	1	4					0	1.4761	137240000	1	1.06193	-0.00813875	0	0.0061148	0.00994544	0.0177586	0.0110387	0.0116792
+	-0.21324	4.03917	sp|P12329|CB21_MAIZE	sp|P12329|CB21_MAIZE	Color [DarkGray]	1	4				+	0	17.514	1828600000	16	4.03917	-0.21324	0.0277968	0.0135146	0.0127859	0.206381	0.241975	0.24546
	-0.583361	1.69621	sp|P12653|GSTF1_MAIZE;sp|P46420|GSTF4_MAIZE	sp|P12653|GSTF1_MAIZE	Color [DarkGray]	1	4				+	0	199.99	16663000000	76	1.69621	-0.583361	1.17903	0.83471	0.667239	1.46357	1.41463	1.55286
	-0.000242938	0.0347073	sp|P12857|ADT2_MAIZE	sp|P12857|ADT2_MAIZE	Color [DarkGray]	1	4	+				1	-2	72255000	2	0.0347073	-0.000242938	0	0.00713915	0.00645413	0.00352702	0.00504114	0.00575393
	-0.371733	0.371741	sp|P12863|TPIS_MAIZE	sp|P12863|TPIS_MAIZE	Color [DarkGray]	1	4					0	323.31	48653000000	146	0.371741	-0.371733	2.67279	3.24868	3.62288	3.02989	4.11762	3.51204
	-0.0147852	0.223942	sp|P13689|ABP1_MAIZE	sp|P13689|ABP1_MAIZE	Color [DarkGray]	1	4					0	183.15	5424500000	38	0.223942	-0.0147852	0.399379	0.355016	0.384832	0.434926	0.390442	0.358215
	0.482031	0.276496	sp|P14641|TBA2_MAIZE;sp|P14640|TBA1_MAIZE;sp|P33626|TBA4_MAIZE	sp|P14641|TBA2_MAIZE;sp|P14640|TBA1_MAIZE	Color [DarkGray]	1	4					0	323.31	147650000000	309	0.276496	0.482031	10.2495	10.6771	10.8414	8.75226	10.8083	10.7614
	0.00113454	0.427243	sp|P15718|POLB_MAIZE	sp|P15718|POLB_MAIZE	Color [DarkGray]	1	4					0	1.3942	5085100	0	0.427243	0.00113454	0.00340363	0	0	0	0	0
	-0.000659217	0.0103242	sp|P15719|MDHP_MAIZE	sp|P15719|MDHP_MAIZE	Color [DarkGray]	1	4					0	38.069	680940000	10	0.0103242	-0.000659217	0.0903937	0.0185412	0.0459758	0.0524518	0.0558932	0.0485433
	-0.0200434	1.15271	sp|P16166|UFOG1_MAIZE;sp|P16165|UFOG2_MAIZE;sp|P16167|UFOG3_MAIZE	sp|P16166|UFOG1_MAIZE;sp|P16165|UFOG2_MAIZE;sp|P16167|UFOG3_MAIZE	Color [DarkGray]	1	4					0	39.437	486720000	10	1.15271	-0.0200434	0.0200372	0.0155359	0.0353769	0.0326449	0.0501293	0.0483062
+	-0.023933	2.02429	sp|P16243|MAOC_MAIZE	sp|P16243|MAOC_MAIZE	Color [DarkGray]	1	4				+	0	14.053	762900000	4	2.02429	-0.023933	0.0522503	0.0376404	0.0368638	0.0663961	0.0679032	0.0642542
	-0.00224895	0.164661	sp|P17788|RK2_MAIZE	sp|P17788|RK2_MAIZE	Color [DarkGray]	1	4					0.0068027	0.92829	37620000	1	0.164661	-0.00224895	0.00700057	0	0	0.0137474	0	0
	0.118326	1.34947	sp|P18025|TBB1_MAIZE	sp|P18025|TBB1_MAIZE	Color [DarkGray]	1	4				+	0	82.466	5677900000	33	1.34947	0.118326	0.431989	0.454752	0.485853	0.263423	0.3753	0.378892
	-0.0235079	0.691948	sp|P18026|TBB2_MAIZE	sp|P18026|TBB2_MAIZE	Color [DarkGray]	1	4					0	13.183	873810000	12	0.691948	-0.0235079	0.018736	0.07125	0.0499714	0.068613	0.0666283	0.0752397
+	0.365437	2.12808	sp|P18122|CATA1_MAIZE	sp|P18122|CATA1_MAIZE	Color [DarkGray]	1	4				+	0	323.31	12108000000	77	2.12808	0.365437	0.982316	1.08989	1.03181	0.557823	0.663605	0.786283
+	0.0328299	2.36428	sp|P18123|CATA3_MAIZE	sp|P18123|CATA3_MAIZE	Color [DarkGray]	1	4				+	0	57.529	1064300000	10	2.36428	0.0328299	0.0824286	0.0954946	0.0955864	0.0525581	0.0648177	0.0576442
	-0.0378157	0.0498896	sp|P19023|ATPBM_MAIZE	sp|P19023|ATPBM_MAIZE	Color [DarkGray]	1	4					0	323.31	110660000000	262	0.0498896	-0.0378157	7.99253	7.74197	7.77822	8.36203	7.54742	7.71672
+	-0.555921	3.92058	sp|P19656|NLTP_MAIZE	sp|P19656|NLTP_MAIZE	Color [DarkGray]	1	4				+	0	167.19	5943700000	27	3.92058	-0.555921	0.0926694	0.1448	0.137228	0.614713	0.725672	0.702074
	0.0610528	0.22675	sp|P19950|RS141_MAIZE;sp|P19951|RS142_MAIZE	sp|P19950|RS141_MAIZE;sp|P19951|RS142_MAIZE	Color [DarkGray]	1	4					0	175.05	14189000000	78	0.22675	0.0610528	1.01605	0.877355	1.22227	0.913744	0.998514	1.02026
	-0.845308	0.5144	sp|P21569|CYPH_MAIZE	sp|P21569|CYPH_MAIZE	Color [DarkGray]	1	4					0	107.62	62287000000	132	0.5144	-0.845308	2.59428	4.17766	4.75291	4.05286	5.08792	4.92
	0.00325981	0.678555	sp|P22198|PP1_MAIZE	sp|P22198|PP1_MAIZE	Color [DarkGray]	1	4					0	1.2637	51790000	2	0.678555	0.00325981	0.00235064	0.00664096	0.0059736	0	0.00518577	0
+	0.344193	1.93454	sp|P22275|TBA3_MAIZE	sp|P22275|TBA3_MAIZE	Color [DarkGray]	1	4				+	0	262.21	18012000000	66	1.93454	0.344193	1.42234	1.44168	1.4624	0.94553	1.19593	1.15238
	0.00677193	0.997723	sp|P23111|CDC2_MAIZE	sp|P23111|CDC2_MAIZE	Color [DarkGray]	1	4					0	10.698	405980000	6	0.997723	0.00677193	0.0261489	0.0349619	0.0336176	0.0217354	0.0254453	0.027232
+	0.0491171	3.10253	sp|P23225|GLTB_MAIZE	sp|P23225|GLTB_MAIZE	Color [DarkGray]	1	4				+	0	41.305	948370000	21	3.10253	0.0491171	0.081786	0.0976927	0.0959868	0.0463325	0.0404584	0.0413232
+	0.21064	3.43486	sp|P23345|SODC4_MAIZE	sp|P23345|SODC4_MAIZE	Color [DarkGray]	1	4				+	0	4.0129	1477000000	3	3.43486	0.21064	0.172882	0.229048	0.229989	0	0	0
+	-0.517418	2.96692	sp|P23346|SODC5_MAIZE	sp|P23346|SODC5_MAIZE	Color [DarkGray]	1	4				+	0	193.47	7039700000	32	2.96692	-0.517418	0.195185	0.236116	0.229443	0.626456	0.832202	0.75434
	0.0815124	0.23462	sp|P23444|H1_MAIZE	sp|P23444|H1_MAIZE	Color [DarkGray]	1	4					0	7.4718	5213000000	15	0.23462	0.0815124	0.668431	0.351923	0.284647	0.488015	0.267763	0.304686
	0.285773	0.114429	sp|P24067|BIP2_MAIZE	sp|P24067|BIP2_MAIZE	Color [DarkGray]	1	4					0	323.31	65512000000	250	0.114429	0.285773	5.5866	5.66466	2.99987	3.99657	4.65366	4.74358
	-0.0227146	0.744444	sp|P24631|HSP21_MAIZE	sp|P24631|HSP21_MAIZE	Color [DarkGray]	1	4					0	9.3579	795940000	12	0.744444	-0.0227146	0.0642997	0.0258574	0.0491969	0.0720903	0.0820846	0.053323
	-0.00135889	0.151935	sp|P24632|HSP22_MAIZE	sp|P24632|HSP22_MAIZE	Color [DarkGray]	1	4	+				1	-2	276320000	4	0.151935	-0.00135889	0.0246884	0.0172572	0.0162499	0.0245976	0.0199003	0.0177743
	-0.00712347	0.541601	sp|P24993|PSBH_MAIZE	sp|P24993|PSBH_MAIZE	Color [DarkGray]	1	4					0	4.4809	124870000	1	0.541601	-0.00712347	0	0.00921844	0.00622178	0.0224977	0.00633785	0.00797513
	0.833641	0.811723	sp|P25460|RS11_MAIZE	sp|P25460|RS11_MAIZE	Color [DarkGray]	1	4					0	105.09	36864000000	113	0.811723	0.833641	2.1074	3.17625	3.59982	1.79074	2.32704	2.26477
	0.000518779	0.0140682	sp|P25462|GLNAC_MAIZE	sp|P25462|GLNAC_MAIZE	Color [DarkGray]	1	4					0	17.773	374630000	7	0.0140682	0.000518779	0.0459954	0.018429	0.0229201	0.0460268	0.0201171	0.0196442
	0.00495394	0.622166	sp|P26259|DAPA_MAIZE	sp|P26259|DAPA_MAIZE	Color [DarkGray]	1	4					0	14.868	120210000	2	0.622166	0.00495394	0.0137602	0.0103803	0.0105276	0.0113594	0	0.00844689
	0.109861	0.0602358	sp|P26301|ENO1_MAIZE	sp|P26301|ENO1_MAIZE	Color [DarkGray]	1	4					0	323.31	72628000000	281	0.0602358	0.109861	6.26551	4.48566	5.21716	5.87938	4.62331	5.13606
	0.431882	0.474881	sp|P27347|MNB1B_MAIZE	sp|P27347|MNB1B_MAIZE	Color [DarkGray]	1	4					0	197.76	30868000000	78	0.474881	0.431882	1.79977	2.87906	2.2906	1.41437	2.06506	2.19436
+	-0.0243296	2.23212	sp|P27497|CB29_MAIZE	sp|P27497|CB29_MAIZE	Color [DarkGray]	1	4				+	0	4.3166	261360000	1	2.23212	-0.0243296	0.00526874	0.0053639	0.00606469	0.0230529	0.0281605	0.0384728
	-0.00300086	0.276141	sp|P27788|FER3_MAIZE	sp|P27788|FER3_MAIZE	Color [DarkGray]	1	4					0	72.48	553850000	10	0.276141	-0.00300086	0.0356789	0.0319972	0.0451529	0.0370483	0.0411441	0.0436392
	-0.136552	0.700025	sp|P27923|RS27A_MAIZE	sp|P27923|RS27A_MAIZE	Color [DarkGray]	1	4					0	109.2	29899000000	132	0.700025	-0.136552	1.99756	2.03138	2.09201	2.14636	2.0481	2.33616
	-0.00738326	0.0302283	sp|P28516|PDC1_MAIZE;sp|Q05326|PDC2_MAIZE	sp|P28516|PDC1_MAIZE;sp|Q05326|PDC2_MAIZE	Color [DarkGray]	1	4					0	35.826	829350000	17	0.0302283	-0.00738326	0.164964	0.0229107	0.0202935	0.210065	0	0.0202528
	0.0243004	1.23081	sp|P28523|CSK2A_MAIZE	sp|P28523|CSK2A_MAIZE	Color [DarkGray]	1	4					0	6.8122	301270000	6	1.23081	0.0243004	0.0488648	0.0251759	0.0312022	0.0117826	0.0205592	0
	-0.084714	1.41176	sp|P29022|CHIA_MAIZE;sp|P29023|CHIB_MAIZE	sp|P29022|CHIA_MAIZE	Color [DarkGray]	1	4				+	0	62.299	582560000	11	1.41176	-0.084714	0	0	0	0.133405	0.0365872	0.0841502
	0.124452	0.775168	sp|P29036|FRI1_MAIZE	sp|P29036|FRI1_MAIZE	Color [DarkGray]	1	4					0	161.3	5040100000	42	0.775168	0.124452	0.308952	0.543794	0.364374	0.239042	0.306075	0.298647
	0.0751519	0.913136	sp|P29038|LDH_MAIZE	sp|P29038|LDH_MAIZE	Color [DarkGray]	1	4					0	8.5857	3578300000	22	0.913136	0.0751519	0.229528	0.339024	0.282205	0.165069	0.234629	0.225603
	0.00479653	0.108795	sp|P29185|CH61_MAIZE	sp|P29185|CH61_MAIZE	Color [DarkGray]	1	4					0	125	1727100000	22	0.108795	0.00479653	0.108245	0.129601	0.132044	0.11035	0.0993264	0.145824
	-0.00892916	0.816585	sp|P29306|1433X_MAIZE	sp|P29306|1433X_MAIZE	Color [DarkGray]	1	4					0	18.515	360530000	6	0.816585	-0.00892916	0.0156162	0.0225425	0.0218139	0.0198141	0.0339388	0.0330073
	0.00668409	0.38921	sp|P29390|FRI2_MAIZE	sp|P29390|FRI2_MAIZE	Color [DarkGray]	1	4					0	11.085	252400000	5	0.38921	0.00668409	0.00934325	0.0300795	0.0198235	0.00501129	0.0181368	0.0160459
	2.80763	0.117	sp|P30756|H2B2_MAIZE;sp|P49120|H2B4_MAIZE;sp|P30755|H2B1_MAIZE;sp|P54348|H2B5_MAIZE;sp|Q43261|H2B3_MAIZE	sp|P30756|H2B2_MAIZE;sp|P49120|H2B4_MAIZE;sp|P30755|H2B1_MAIZE;sp|P54348|H2B5_MAIZE;sp|Q43261|H2B3_MAIZE	Color [DarkGray]	1	4					0	192.69	140260000000	54	0.117	2.80763	27.1308	5.98318	6.00176	20.5343	5.27041	4.88814
	-0.281132	0.636041	sp|P30792|PMGI_MAIZE	sp|P30792|PMGI_MAIZE	Color [DarkGray]	1	4					0	323.31	46957000000	195	0.636041	-0.281132	3.528	2.90709	3.19789	3.6326	3.51048	3.33329
	0.00183146	0.220117	sp|P33521|MVP_MSTV	sp|P33521|MVP_MSTV	Color [DarkGray]	1	4					0	1.3923	144950000	3	0.220117	0.00183146	0.00434954	0.0148834	0.0124616	0.00760281	0.00891127	0.00968612
	-0.00483627	0.0315459	sp|Q02245|TBA5_MAIZE;sp|P33627|TBA6_MAIZE	sp|Q02245|TBA5_MAIZE;sp|P33627|TBA6_MAIZE	Color [DarkGray]	1	4					0	91.29	2585800000	26	0.0315459	-0.00483627	0.208317	0.195833	0.126689	0.0960816	0.200763	0.248503
+	-0.0284772	2.80404	sp|P33679|ZEAM_MAIZE;sp|P13867|IAAT_MAIZE	sp|P33679|ZEAM_MAIZE;sp|P13867|IAAT_MAIZE	Color [DarkGray]	1	4				+	0	28.612	221160000	5	2.80404	-0.0284772	0.00172642	0.00183576	0	0.0369587	0.0268095	0.0252256
	-0.0321571	0.603842	sp|P38560|GLNA2_MAIZE	sp|P38560|GLNA2_MAIZE	Color [DarkGray]	1	4					0	8.735	952900000	15	0.603842	-0.0321571	0.0235077	0.0501313	0.067714	0.039121	0.101073	0.0976306
	0.00469673	0.0334139	sp|P38561|GLNA3_MAIZE	sp|P38561|GLNA3_MAIZE	Color [DarkGray]	1	4					0	8.335	2376400000	11	0.0334139	0.00469673	0.115875	0.20712	0.1607	0.079895	0.211398	0.178311
	-0.485814	1.4442	sp|P38562|GLNA4_MAIZE;sp|P38559|GLNA1_MAIZE;sp|P38563|GLNA5_MAIZE	sp|P38562|GLNA4_MAIZE	Color [DarkGray]	1	4				+	0	323.31	11385000000	82	1.4442	-0.485814	0.430081	0.498253	0.674323	0.743629	1.17004	1.14643
	2.17237	0.750992	sp|P40280|H2A_MAIZE	sp|P40280|H2A_MAIZE	Color [DarkGray]	1	4					0	37.47	123180000000	41	0.750992	2.17237	7.60565	9.7515	11.5837	6.14511	8.05561	8.22306
	-0.150402	0.709022	sp|P41040|CALM_MAIZE	sp|P41040|CALM_MAIZE	Color [DarkGray]	1	4					0	193.2	15057000000	46	0.709022	-0.150402	1.01505	0.927701	1.05606	1.32651	1.0398	1.08371
	0.0108942	0.0407084	sp|P41376|IF4A1_ARATH	sp|P41376|IF4A1_ARATH	Color [DarkGray]	1	4	+				1	-2	659860000	1	0.0407084	0.0108942	0.208786	0	0	0.176103	0	0
	0.0686079	1.31987	sp|P41980|SODM4_MAIZE;sp|P41978|SODM2_MAIZE	sp|P41980|SODM4_MAIZE;sp|P41978|SODM2_MAIZE	Color [DarkGray]	1	4				+	0	24.967	1282200000	18	1.31987	0.0686079	0.0824085	0.143852	0.138033	0.0240181	0.0651927	0.0692593
	0.00720384	0.162019	sp|P42057|VDAC_MAIZE	sp|P42057|VDAC_MAIZE	Color [DarkGray]	1	4					0	36.656	579550000	9	0.162019	0.00720384	0.0106886	0.0614541	0.0517404	0.0218908	0.0403477	0.0400331
	0.0156518	0.354355	sp|P42390|TRPA_MAIZE	sp|P42390|TRPA_MAIZE	Color [DarkGray]	1	4	+				1	-2	1673300000	1	0.354355	0.0156518	0.100045	0.152901	0.114658	0.0880743	0.114811	0.117764
	0.0893976	1.61319	sp|P42856|ZB14_MAIZE	sp|P42856|ZB14_MAIZE	Color [DarkGray]	1	4				+	0	7.0444	1972000000	13	1.61319	0.0893976	0.17139	0.201776	0.173593	0.0673376	0.139606	0.0716219
	0.0240483	0.0238777	sp|P42895|ENO2_MAIZE	sp|P42895|ENO2_MAIZE	Color [DarkGray]	1	4					0	323.31	43224000000	180	0.0238777	0.0240483	2.66436	3.43005	2.94033	2.63287	2.85573	3.474
	0.0272358	0.538399	sp|P43188|KADC_MAIZE	sp|P43188|KADC_MAIZE	Color [DarkGray]	1	4					0	1.2627	263310000	3	0.538399	0.0272358	0.00775224	0.0735204	0.00581914	0	0.00538433	0
	0.00135611	0.158337	sp|P43283|TRPB1_MAIZE;sp|Q59992|TRPB_SYNY3;sp|P43284|TRPB2_MAIZE	sp|P43283|TRPB1_MAIZE;sp|Q59992|TRPB_SYNY3;sp|P43284|TRPB2_MAIZE	Color [DarkGray]	1	4					0	32.081	271960000	5	0.158337	0.00135611	0.0167802	0.0212032	0.0201514	0.0121885	0.021197	0.020681
	0.408022	0.663268	sp|P45633|RL10_MAIZE	sp|P45633|RL10_MAIZE	Color [DarkGray]	1	4					0	96.776	23433000000	95	0.663268	0.408022	1.36437	2.07603	2.00422	1.10395	1.45424	1.66237
	0.0417577	0.118951	sp|P46252|RLA2A_MAIZE	sp|P46252|RLA2A_MAIZE	Color [DarkGray]	1	4					0	63.423	3246100000	36	0.118951	0.0417577	0.46745	0.179469	0.178279	0.401515	0.15873	0.13968
	-0.0162501	0.407496	sp|P46617|CYF_MAIZE	sp|P46617|CYF_MAIZE	Color [DarkGray]	1	4					0	8.3207	676780000	5	0.407496	-0.0162501	0.00355872	0.057252	0.0473795	0.044803	0.0560789	0.0560587
	-0.0230223	0.828122	sp|P48183|PSBA_MAIZE	sp|P48183|PSBA_MAIZE	Color [DarkGray]	1	4					0	2.9504	643440000	7	0.828122	-0.0230223	0.0147588	0.041599	0.0367076	0.0343374	0.0655069	0.0622879
	-0.0249675	0.889277	sp|P48184|PSBD_MAIZE	sp|P48184|PSBD_MAIZE	Color [DarkGray]	1	4					0	14.356	762600000	5	0.889277	-0.0249675	0.022993	0.049029	0.0493289	0.0848856	0.056611	0.0547569
+	-0.0451332	2.06154	sp|P48187|PSBC_MAIZE	sp|P48187|PSBC_MAIZE	Color [DarkGray]	1	4				+	0	31.752	1124100000	10	2.06154	-0.0451332	0.0464753	0.060615	0.055978	0.082608	0.108215	0.107645
	-2.89261	1.79774	sp|P49036|SUS2_MAIZE	sp|P49036|SUS2_MAIZE	Color [DarkGray]	1	4				+	0	323.31	262510000000	521	1.79774	-2.89261	18.0747	16.3444	16.9747	20.1623	20.8356	19.0738
	-0.151789	0.805051	sp|P49076|ARF_MAIZE	sp|P49076|ARF_MAIZE	Color [DarkGray]	1	4					0	126.95	11275000000	77	0.805051	-0.151789	0.689415	0.730565	0.69989	0.686586	0.958588	0.930063
	0.0238866	1.00886	sp|P49079|AKH1_MAIZE	sp|P49079|AKH1_MAIZE	Color [DarkGray]	1	4					0	19.214	1401300000	31	1.00886	0.0238866	0.111678	0.118377	0.101434	0.0811401	0.10593	0.0727605
	0.0235441	0.386031	sp|P49080|AKH2_MAIZE	sp|P49080|AKH2_MAIZE	Color [DarkGray]	1	4					0	12.702	547870000	8	0.386031	0.0235441	0.0899452	0.0354983	0.0420326	0.0704858	0.0132785	0.0130793
	-0.718462	1.1659	sp|P49087|VATA_MAIZE	sp|P49087|VATA_MAIZE	Color [DarkGray]	1	4					0	323.31	34056000000	175	1.1659	-0.718462	2.31449	1.87508	1.97254	2.85461	3.17142	2.29147
	0.000815709	0.0926564	sp|P49094|ASNS_MAIZE	sp|P49094|ASNS_MAIZE	Color [DarkGray]	1	4					0	5.1064	179630000	6	0.0926564	0.000815709	0.0137455	0.00946029	0.016103	0.0073634	0.0145031	0.0149951
	-0.0138675	1.36184	sp|P49101|CDPK2_MAIZE	sp|P49101|CDPK2_MAIZE	Color [DarkGray]	1	4				+	0	2.3602	265230000	5	1.36184	-0.0138675	0.00535455	0.0116942	0.0153646	0.0171973	0.0290062	0.0278125
	-0.0177975	0.41751	sp|P49104|RAB2B_MAIZE;sp|P49103|RAB2A_MAIZE	sp|P49104|RAB2B_MAIZE;sp|P49103|RAB2A_MAIZE	Color [DarkGray]	1	4					0	22.243	1917400000	27	0.41751	-0.0177975	0.0964645	0.142717	0.128216	0.116479	0.154309	0.150002
	-0.0535774	1.48362	sp|P49105|G6PI_MAIZE	sp|P49105|G6PI_MAIZE	Color [DarkGray]	1	4				+	0	104.1	2742500000	41	1.48362	-0.0535774	0.171343	0.144737	0.187947	0.238192	0.225855	0.200713
+	-0.670184	2.15796	sp|P49106|14331_MAIZE	sp|P49106|14331_MAIZE	Color [DarkGray]	1	4				+	0	323.31	32632000000	143	2.15796	-0.670184	2.0995	1.72296	2.10244	2.57881	2.65117	2.70548
+	-0.0172778	3.65961	sp|P49175|INV1_MAIZE	sp|P49175|INV1_MAIZE	Color [DarkGray]	1	4				+	0	8.1013	168020000	1	3.65961	-0.0172778	0.00302151	0.00204355	0.00361509	0.0184632	0.019381	0.0226695
	0.0106805	0.498323	sp|P49178|GBB_MAIZE	sp|P49178|GBB_MAIZE	Color [DarkGray]	1	4					0	3.6286	183940000	4	0.498323	0.0106805	0.0120186	0.0354753	0.0045857	0.00860548	0.00588895	0.0055437
+	-3.62864	2.25384	sp|P49235|HGGL1_MAIZE	sp|P49235|HGGL1_MAIZE	Color [DarkGray]	1	4				+	0	323.31	30217000000	117	2.25384	-3.62864	0.363208	0.334713	0.264387	5.27859	3.1786	3.39104
	0.0144643	0.879476	sp|P49249|IN22_MAIZE	sp|P49249|IN22_MAIZE	Color [DarkGray]	1	4					0	18.338	1522200000	17	0.879476	0.0144643	0.119804	0.122592	0.103626	0.110299	0.0982943	0.0940361
+	-0.0166818	2.92044	sp|P49353|FPPS_MAIZE	sp|P49353|FPPS_MAIZE	Color [DarkGray]	1	4				+	0	6.5103	226130000	8	2.92044	-0.0166818	0.0046822	0.00593086	0.0112194	0.0246391	0.0236801	0.0235586
	0.0117334	0.173487	sp|P49727|UCRI_MAIZE	sp|P49727|UCRI_MAIZE	Color [DarkGray]	1	4					0	42.473	3139600000	16	0.173487	0.0117334	0.195138	0.247277	0.232607	0.201714	0.185214	0.252894
+	0.206991	1.99019	sp|P51059|CAPP2_MAIZE	sp|P51059|CAPP2_MAIZE	Color [DarkGray]	1	4				+	0	68.675	6215200000	71	1.99019	0.206991	0.542663	0.585814	0.509219	0.389084	0.36655	0.261089
	0.0141713	0.0567825	sp|P51421|RL32_MAIZE	sp|P51421|RL32_MAIZE	Color [DarkGray]	1	4					0	36.17	5566500000	28	0.0567825	0.0141713	0.299581	0.399965	0.46429	0.230418	0.44301	0.447894
	0.0618615	0.876593	sp|P51425|RL39_MAIZE	sp|P51425|RL39_MAIZE	Color [DarkGray]	1	4					0	2.4851	3546400000	5	0.876593	0.0618615	0.218879	0.308833	0.300572	0.184859	0.23985	0.21799
+	-0.0728579	3.43027	sp|P52580|IFRH_MAIZE	sp|P52580|IFRH_MAIZE	Color [DarkGray]	1	4				+	0	6.7065	544210000	9	3.43027	-0.0728579	0	0.00138824	0.00172084	0.0854069	0.0734672	0.0628086
	-0.765573	0.516283	sp|P52588|PDI_MAIZE	sp|P52588|PDI_MAIZE	Color [DarkGray]	1	4					0	323.31	42271000000	192	0.516283	-0.765573	3.00384	2.70495	2.29382	4.66752	2.80284	2.82897
	0.00650063	0.0694691	sp|P52855|RLA1_MAIZE	sp|P52855|RLA1_MAIZE	Color [DarkGray]	1	4					0	17.695	3894900000	7	0.0694691	0.00650063	0.283323	0.273954	0.269743	0.207798	0.318221	0.281498
	0.00765828	0.465361	sp|P55005|AMYB_MAIZE	sp|P55005|AMYB_MAIZE	Color [DarkGray]	1	4					0	1.2527	176250000	3	0.465361	0.00765828	0.00292807	0.0188202	0.0239098	0.00105572	0.0114747	0.0101528
+	0.164218	3.28063	sp|P55234|GLGL2_MAIZE;sp|P55241|GLGL1_MAIZE	sp|P55234|GLGL2_MAIZE	Color [DarkGray]	1	4				+	0	76.05	3457500000	45	3.28063	0.164218	0.316455	0.317843	0.356766	0.181382	0.149438	0.167589
	0.0154434	1.12056	sp|P55240|GLGS_MAIZE	sp|P55240|GLGS_MAIZE	Color [DarkGray]	1	4					0	20.918	797040000	11	1.12056	0.0154434	0.0689884	0.0584662	0.0657162	0.0379685	0.0518613	0.0570108
	0.0263488	0.669885	sp|P55876|IF5_MAIZE	sp|P55876|IF5_MAIZE	Color [DarkGray]	1	4					0	15.442	855890000	12	0.669885	0.0263488	0.0505455	0.08714	0.0743058	0.0172595	0.0656926	0.0499927
	-0.00325017	1.24078	sp|P56330|SUI1_MAIZE	sp|P56330|SUI1_MAIZE	Color [DarkGray]	1	4					0	11.156	207600000	6	1.24078	-0.00325017	0.0124583	0.0150697	0.0110433	0.0166269	0.016253	0.015442
	-0.0054429	0.194542	sp|P56521|HDA19_MAIZE	sp|P56521|HDA19_MAIZE	Color [DarkGray]	1	4					0	1.1468	333880000	4	0.194542	-0.0054429	0.0119249	0.0241673	0.0210403	0.00548662	0.0398834	0.0280911
	1.30131	0.937156	sp|Q41811|H43_MAIZE;sp|P62787|H4_MAIZE	sp|Q41811|H43_MAIZE;sp|P62787|H4_MAIZE	Color [DarkGray]	1	4					0	169.61	133060000000	124	0.937156	1.30131	10.2053	9.51755	10.7014	9.61322	9.13412	7.77306
	1.8457	0.755018	sp|P69246|H32_MAIZE	sp|P69246|H32_MAIZE	Color [DarkGray]	1	4					0	34.089	75071000000	32	0.755018	1.8457	4.79572	5.45341	8.44268	4.49472	4.32832	4.33167
	0.0048052	0.44961	sp|P69388|PSBE_MAIZE	sp|P69388|PSBE_MAIZE	Color [DarkGray]	1	4					0	1.7341	91604000	2	0.44961	0.0048052	0.0127723	0.00665511	0.00754323	0	0.012555	0
	-0.744723	0.778646	sp|P80607|RGP1_MAIZE	sp|P80607|RGP1_MAIZE	Color [DarkGray]	1	4					0	262.98	31930000000	104	0.778646	-0.744723	2.24241	1.7399	1.83322	3.5085	2.23948	2.30172
	0.0115252	0.0648158	sp|P80608|CYSK_MAIZE	sp|P80608|CYSK_MAIZE	Color [DarkGray]	1	4					0	205.83	11244000000	87	0.0648158	0.0115252	0.876561	0.793151	0.732937	0.70177	0.809917	0.856386
	0.0355395	0.126134	sp|P80609|UC03_MAIZE	sp|P80609|UC03_MAIZE	Color [DarkGray]	1	4					0	2.2586	956190000	5	0.126134	0.0355395	0.257051	0.0261657	0.0338315	0.21043	0	0
	-0.0469735	0.268132	sp|P80610|UC04_MAIZE	sp|P80610|UC04_MAIZE	Color [DarkGray]	1	4					0	6.0937	3291300000	18	0.268132	-0.0469735	0.111779	0.227185	0.249809	0.13219	0.297197	0.300306
	-0.03512	0.135608	sp|P80639|IF5A_MAIZE	sp|P80639|IF5A_MAIZE	Color [DarkGray]	1	4					0	199.59	15248000000	83	0.135608	-0.03512	1.2117	1.08216	0.912915	1.17168	1.10901	1.03145
	0.00541804	0.470695	sp|P93008|RH21_ARATH	sp|P93008|RH21_ARATH	Color [DarkGray]	1	4					0	1.5574	239160000	2	0.470695	0.00541804	0.0135929	0.0286247	0.0142169	0.0117066	0.0138781	0.0145956
	0.097023	0.969818	sp|P93629|ADHX_MAIZE	sp|P93629|ADHX_MAIZE	Color [DarkGray]	1	4					0	117.16	7662000000	58	0.969818	0.097023	0.641625	0.546064	0.61461	0.576044	0.452045	0.48314
	0.0082802	0.467516	sp|P93647|LONP2_MAIZE	sp|P93647|LONP2_MAIZE	Color [DarkGray]	1	4					0	1.5558	281030000	1	0.467516	0.0082802	0.0221557	0.0240268	0.0238121	0	0.0202785	0.0248755
	0.0522327	0.334141	sp|P93648|LONM_MAIZE	sp|P93648|LONM_MAIZE	Color [DarkGray]	1	4					0	115.22	2607500000	24	0.334141	0.0522327	0.139282	0.240051	0.221245	0.0348805	0.201513	0.207486
	0.0266672	1.39148	sp|P93703|C71C3_MAIZE	sp|P93703|C71C3_MAIZE	Color [DarkGray]	1	4				+	0	9.8931	241300000	7	1.39148	0.0266672	0.0116391	0.0386079	0.0376409	0	0.00327974	0.0046064
	-0.486143	1.81159	sp|P93804|PGMC1_MAIZE	sp|P93804|PGMC1_MAIZE	Color [DarkGray]	1	4				+	0	323.31	30008000000	210	1.81159	-0.486143	1.73485	1.96155	1.89892	2.51888	2.17595	2.35893
	-0.0499793	1.01972	sp|P93805|PGMC2_MAIZE	sp|P93805|PGMC2_MAIZE	Color [DarkGray]	1	4					0	114.99	4765400000	45	1.01972	-0.0499793	0.282968	0.300242	0.341373	0.328235	0.377085	0.3692
	-0.047225	1.20667	sp|Q01526|14332_MAIZE	sp|Q01526|14332_MAIZE	Color [DarkGray]	1	4					0	35.495	2326400000	14	1.20667	-0.047225	0.104885	0.164691	0.138222	0.171943	0.193496	0.184035
	0.0385558	0.30415	sp|Q05327|PDC3_MAIZE	sp|Q05327|PDC3_MAIZE	Color [DarkGray]	1	4					0	174.93	2888600000	23	0.30415	0.0385558	0.144436	0.287955	0.207349	0.113609	0.20176	0.208703
	0.00677257	0.0717691	sp|Q05737|YPTM2_MAIZE;sp|P16976|YPTM1_MAIZE	sp|Q05737|YPTM2_MAIZE	Color [DarkGray]	1	4					0	15.787	5873700000	26	0.0717691	0.00677257	0.416708	0.369527	0.47956	0.432526	0.404227	0.408724
+	0.370536	1.98829	sp|Q05761|RS13_MAIZE	sp|Q05761|RS13_MAIZE	Color [DarkGray]	1	4				+	0	44.115	12931000000	69	1.98829	0.370536	1.11491	1.22102	0.966117	0.756788	0.769813	0.663837
+	-0.665782	3.43959	sp|Q06509|COMT1_MAIZE	sp|Q06509|COMT1_MAIZE	Color [DarkGray]	1	4				+	0	127.42	7197700000	60	3.43959	-0.665782	0.244655	0.105936	0.172092	0.923766	0.82156	0.774703
	0.00214534	0.103664	sp|Q08047|GLGB_MAIZE	sp|Q08047|GLGB_MAIZE	Color [DarkGray]	1	4					0	1.1894	91785000	2	0.103664	0.00214534	0.0201202	0	0.00739802	0.0156267	0	0.00545548
	-0.0429858	0.0238843	sp|Q08062|MDHC_MAIZE	sp|Q08062|MDHC_MAIZE	Color [DarkGray]	1	4					0	323.31	89349000000	156	0.0238843	-0.0429858	5.43701	6.66597	6.43916	5.31807	6.46713	6.8859
	0.000463645	0.00555691	sp|Q08066|RL19_MAIZE	sp|Q08066|RL19_MAIZE	Color [DarkGray]	1	4					0	17.063	2509700000	17	0.00555691	0.000463645	0.218357	0.146794	0.184673	0.218564	0.163066	0.166804
	0.0269768	0.273774	sp|Q08068|RS20_MAIZE	sp|Q08068|RS20_MAIZE	Color [DarkGray]	1	4					0	27.843	3243700000	28	0.273774	0.0269768	0.292386	0.263756	0.18536	0.265615	0.189164	0.205792
	0.945338	0.669089	sp|Q08069|RS8_MAIZE	sp|Q08069|RS8_MAIZE	Color [DarkGray]	1	4					0	153.57	53841000000	92	0.669089	0.945338	3.18938	4.14311	5.34917	3.00402	3.47516	3.36647
	-0.171626	0.89144	sp|Q08275|HSP23_MAIZE	sp|Q08275|HSP23_MAIZE	Color [DarkGray]	1	4					0	121.03	5192200000	33	0.89144	-0.171626	0.417196	0.132382	0.319943	0.397208	0.503935	0.483257
	-0.289323	0.169597	sp|Q08277|HSP82_MAIZE	sp|Q08277|HSP82_MAIZE	Color [DarkGray]	1	4					0	213.6	32948000000	104	0.169597	-0.289323	2.65057	2.95303	0.914632	2.66111	2.28405	2.44104
	0.0400088	1.50789	sp|Q08704|CFI_MAIZE	sp|Q08704|CFI_MAIZE	Color [DarkGray]	1	4				+	0	43.202	2448500000	33	1.50789	0.0400088	0.184208	0.195471	0.196084	0.129386	0.168305	0.158045
	0.0539773	0.0160095	sp|Q09054|G3PC2_MAIZE	sp|Q09054|G3PC2_MAIZE	Color [DarkGray]	1	4					0	323.31	185710000000	246	0.0160095	0.0539773	12.4249	14.7531	11.6999	11.6408	13.4603	13.6148
	0.00459398	0.0960184	sp|Q10716|CYSP1_MAIZE	sp|Q10716|CYSP1_MAIZE	Color [DarkGray]	1	4					0	85.121	1163000000	17	0.0960184	0.00459398	0.0530093	0.0930827	0.0980286	0.0591026	0.0915197	0.0797164
	-0.0352408	0.635401	sp|Q10717|CYSP2_MAIZE	sp|Q10717|CYSP2_MAIZE	Color [DarkGray]	1	4					0	5.6342	1255900000	18	0.635401	-0.0352408	0.0270632	0.0915855	0.0773773	0.0694634	0.116161	0.116124
	0.0111687	0.332051	sp|Q10724|PPIM_MAIZE	sp|Q10724|PPIM_MAIZE	Color [DarkGray]	1	4					0	5.182	638140000	14	0.332051	0.0111687	0.0251744	0.0673079	0.0514103	0.0240601	0.0417583	0.044568
	0.00216729	0.153981	sp|Q39189|RH7_ARATH	sp|Q39189|RH7_ARATH	Color [DarkGray]	1	4					0	1.194	61392000	2	0.153981	0.00216729	0.0118686	0.00659193	0	0.0119587	0	0
+	-0.0123049	1.96217	sp|Q41048|PSBQ1_MAIZE	sp|Q41048|PSBQ1_MAIZE	Color [DarkGray]	1	4				+	0	5.488	220930000	6	1.96217	-0.0123049	0.0104262	0.0128219	0.00397069	0.0206735	0.0206324	0.0228276
	0.0259676	0.269526	sp|Q41739|THI42_MAIZE;sp|Q41738|THI41_MAIZE	sp|Q41739|THI42_MAIZE;sp|Q41738|THI41_MAIZE	Color [DarkGray]	1	4					0	15.213	2184500000	34	0.269526	0.0259676	0.116879	0.193829	0.170411	0.0732797	0.175133	0.154805
	0.944981	0.741952	sp|Q41741|IF4A_MAIZE;sp|Q9CAI7|IF4A3_ARATH	sp|Q41741|IF4A_MAIZE;sp|Q9CAI7|IF4A3_ARATH	Color [DarkGray]	1	4					0	323.31	71261000000	224	0.741952	0.944981	4.53709	5.88414	5.81254	3.74821	5.07685	4.57376
	-0.00382484	0.145157	sp|Q41745|LPAT_MAIZE	sp|Q41745|LPAT_MAIZE	Color [DarkGray]	1	4					0	12.823	366390000	5	0.145157	-0.00382484	0.00870872	0.0262809	0.0316823	0.0123282	0.0342969	0.0315213
+	-0.369052	6.05263	sp|Q41761|HGGL2_MAIZE	sp|Q41761|HGGL2_MAIZE	Color [DarkGray]	1	4				+	0	159.22	2927600000	37	6.05263	-0.369052	0.00800324	0.0114422	0.0255432	0.386078	0.391263	0.374804
	-0.0362634	0.132122	sp|Q41764|ADF3_MAIZE	sp|Q41764|ADF3_MAIZE	Color [DarkGray]	1	4					0	89.383	9325300000	45	0.132122	-0.0362634	0.523768	0.681536	0.669087	0.572096	0.835809	0.575276
	0.0309282	0.634043	sp|Q41768|ILVB1_MAIZE	sp|Q41768|ILVB1_MAIZE	Color [DarkGray]	1	4					0	84.299	3249000000	47	0.634043	0.0309282	0.265378	0.20965	0.267415	0.194243	0.22928	0.226135
	0.0266226	1.38235	sp|Q41769|ILVB2_MAIZE	sp|Q41769|ILVB2_MAIZE	Color [DarkGray]	1	4				+	0	22.869	669540000	12	1.38235	0.0266226	0.0578874	0.0518029	0.0736546	0.0254753	0.0316425	0.0463594
	-0.00992757	0.262365	sp|Q41782|TBB4_MAIZE	sp|Q41782|TBB4_MAIZE	Color [DarkGray]	1	4					0	79.198	3921600000	32	0.262365	-0.00992757	0.242902	0.28269	0.282737	0.277823	0.292515	0.267773
+	2.34291	1.89352	sp|Q41783|TBB6_MAIZE	sp|Q41783|TBB6_MAIZE	Color [DarkGray]	1	4				+	0	323.31	137400000000	380	1.89352	2.34291	11.1752	10.0111	11.8143	8.88639	8.39809	8.68743
	0.422671	0.720782	sp|Q41784|TBB7_MAIZE	sp|Q41784|TBB7_MAIZE	Color [DarkGray]	1	4					0	153.07	29273000000	107	0.720782	0.422671	2.04314	2.40528	2.28088	1.40273	2.25541	1.80316
	4.12576	0.886991	sp|Q41803|EF1A_MAIZE	sp|Q41803|EF1A_MAIZE	Color [DarkGray]	1	4					0	323.31	245670000000	347	0.886991	4.12576	14.981	21.5277	20.815	14.0961	14.647	16.2032
	0.108285	0.606382	sp|Q41874|TBG3_MAIZE;sp|Q41808|TBG2_MAIZE;sp|Q41807|TBG1_MAIZE	sp|Q41874|TBG3_MAIZE;sp|Q41808|TBG2_MAIZE;sp|Q41807|TBG1_MAIZE	Color [DarkGray]	1	4					0	60.388	1535000000	17	0.606382	0.108285	0.0969331	0.311219	0.0523784	0.0537729	0.0369407	0.0449604
	0.0547363	0.771427	sp|Q41852|RS21_MAIZE	sp|Q41852|RS21_MAIZE	Color [DarkGray]	1	4					0	7.2131	3973900000	6	0.771427	0.0547363	0.271931	0.287675	0.360216	0.216397	0.263056	0.276159
	-0.00206123	1.56256	sp|Q41870|PIP11_MAIZE	sp|Q41870|PIP11_MAIZE	Color [DarkGray]	1	4				+	0	2.576	115320000	1	1.56256	-0.00206123	0.00819132	0.00682326	0.00652673	0.00986376	0.00909376	0.00876748
	0.00850421	0.40483	sp|Q41898|ATP5E_MAIZE	sp|Q41898|ATP5E_MAIZE	Color [DarkGray]	1	4					0.0069444	0.98459	253090000	3	0.40483	0.00850421	0.00850524	0.0313098	0.0215199	0	0.0182718	0.0175505
	0.0123522	1.07717	sp|Q42368|PPDK2_MAIZE;sp|P11155|PPDK1_MAIZE	sp|Q42368|PPDK2_MAIZE	Color [DarkGray]	1	4					0	4.9661	192740000	3	1.07717	0.0123522	0.00896842	0.0253092	0.022543	0.00289707	0.0091159	0.00775091
	-0.538581	1.72394	sp|Q43247|G3PC3_MAIZE	sp|Q43247|G3PC3_MAIZE	Color [DarkGray]	1	4				+	0	314.45	26141000000	92	1.72394	-0.538581	1.73291	1.49051	1.55274	2.37099	2.03617	1.98475
+	0.00928649	4.7035	sp|Q43255|C71C2_MAIZE	sp|Q43255|C71C2_MAIZE	Color [DarkGray]	1	4				+	0	6.8604	64240000	3	4.7035	0.00928649	0.00853067	0.0098749	0.00945391	0	0	0
	0.063142	0.724338	sp|Q43260|DHE3_MAIZE	sp|Q43260|DHE3_MAIZE	Color [DarkGray]	1	4					0	66.761	2322100000	22	0.724338	0.063142	0.276	0.162697	0.174746	0.173674	0.136039	0.114305
+	0.494375	2.05044	sp|Q43266|PCNA_MAIZE	sp|Q43266|PCNA_MAIZE	Color [DarkGray]	1	4				+	0	184.76	15178000000	81	2.05044	0.494375	1.53445	1.18041	1.33395	0.87386	0.821881	0.869947
+	-0.153153	2.29966	sp|Q43270|PLDA1_MAIZE;sp|Q43007|PLDA1_ORYSJ	sp|Q43270|PLDA1_MAIZE	Color [DarkGray]	1	4				+	0	208.66	6541800000	75	2.29966	-0.153153	0.355805	0.374924	0.415736	0.556659	0.555789	0.493477
	-0.0943496	1.70083	sp|Q43272|GAPN_MAIZE	sp|Q43272|GAPN_MAIZE	Color [DarkGray]	1	4				+	0	78.774	1477000000	19	1.70083	-0.0943496	0.0281562	0.0632474	0.0624642	0.10133	0.162976	0.17261
	0.89465	1.86628	sp|Q43298|CH62_MAIZE;sp|P29197|CH60A_ARATH	sp|Q43298|CH62_MAIZE	Color [DarkGray]	1	4				+	0	323.31	43830000000	200	1.86628	0.89465	3.11408	3.7953	3.65993	2.59455	2.57707	2.71375
	0.235958	0.4914	sp|Q43697|TBB5_MAIZE;sp|Q41785|TBB8_MAIZE	sp|Q43697|TBB5_MAIZE;sp|Q41785|TBB8_MAIZE	Color [DarkGray]	1	4					0	81.919	9961700000	25	0.4914	0.235958	0.651136	0.883377	0.847173	0.165089	0.75135	0.757371
	0.128213	0.742724	sp|Q9LFN6|RH56_ARATH;sp|Q56XG6|RH15_ARATH	sp|Q9LFN6|RH56_ARATH;sp|Q56XG6|RH15_ARATH	Color [DarkGray]	1	4					0	53.213	9134800000	53	0.742724	0.128213	0.863576	0.662911	0.654433	0.678741	0.555361	0.56218
	-0.00457284	0.67966	sp|Q56YU0|AL2C4_ARATH	sp|Q56YU0|AL2C4_ARATH	Color [DarkGray]	1	4					0.0069204	0.98302	154100000	2	0.67966	-0.00457284	0.00713377	0.00961626	0.00746139	0.0068112	0.0164065	0.0147122
	0.0628065	0.663366	sp|Q6JB11|MEG5_MAIZE	sp|Q6JB11|MEG5_MAIZE	Color [DarkGray]	1	4					0	10.452	2012400000	16	0.663366	0.0628065	0.11293	0.163313	0.238438	0.112329	0.146006	0.0679264
	-1.53586	0.952286	sp|Q6XZ78|SCRK2_MAIZE	sp|Q6XZ78|SCRK2_MAIZE	Color [DarkGray]	1	4					0	323.31	146190000000	207	0.952286	-1.53586	8.91755	9.26187	10.1699	9.6942	11.4315	11.8312
	0.0758099	0.581289	sp|Q6XZ79|SCRK1_MAIZE	sp|Q6XZ79|SCRK1_MAIZE	Color [DarkGray]	1	4					0	191.26	14312000000	74	0.581289	0.0758099	1.06163	0.98772	1.10139	0.909037	1.06719	0.947083
	-0.735349	1.58031	sp|Q7SIC9|TKTC_MAIZE	sp|Q7SIC9|TKTC_MAIZE	Color [DarkGray]	1	4				+	0	323.31	37952000000	182	1.58031	-0.735349	2.0724	2.6575	2.10328	3.19585	2.8618	2.98157
	0.0262675	0.0196139	sp|Q84RL7|PIP21_MAIZE	sp|Q84RL7|PIP21_MAIZE	Color [DarkGray]	1	4					0	97.663	27629000000	41	0.0196139	0.0262675	1.21478	2.21522	2.211	1.26395	2.20248	2.09577
	-0.183833	1.00495	sp|Q84TC2|BX6_MAIZE	sp|Q84TC2|BX6_MAIZE	Color [DarkGray]	1	4					0	88.912	4951500000	37	1.00495	-0.183833	0.342351	0.143168	0.32712	0.568958	0.401727	0.393452
	0.0765076	0.599753	sp|Q84W89|RH37_ARATH;sp|Q9M2F9|RH52_ARATH	sp|Q84W89|RH37_ARATH;sp|Q9M2F9|RH52_ARATH	Color [DarkGray]	1	4					0	19.784	3576600000	33	0.599753	0.0765076	0.208538	0.343631	0.292616	0.128338	0.216823	0.270101
+	-0.141622	2.00404	sp|Q84Y01|ITPK1_MAIZE	sp|Q84Y01|ITPK1_MAIZE	Color [DarkGray]	1	4				+	0	100.75	5651400000	49	2.00404	-0.141622	0.348436	0.318481	0.323164	0.528517	0.454974	0.431457
	0.00787486	1.03799	sp|Q8H136|RH14_ARATH;sp|Q9LYJ9|RH46_ARATH	sp|Q8H136|RH14_ARATH	Color [DarkGray]	1	4					0	4.8551	641490000	8	1.03799	0.00787486	0.0528065	0.049493	0.0473399	0.0481931	0.0402477	0.037574
	-0.105116	0.207477	sp|Q8H6A5|TCTP_MAIZE	sp|Q8H6A5|TCTP_MAIZE	Color [DarkGray]	1	4					0	155.13	8578600000	40	0.207477	-0.105116	0.675961	0.215912	0.815137	0.524063	0.745314	0.75298
	0.13839	0.328462	sp|Q8H6B1|SPT16_MAIZE	sp|Q8H6B1|SPT16_MAIZE	Color [DarkGray]	1	4					0	323.31	5098900000	26	0.328462	0.13839	0.114932	0.57025	0.506623	0.0610512	0.356112	0.35947
	0.0258864	0.393325	sp|Q8LA13|RH11_ARATH	sp|Q8LA13|RH11_ARATH	Color [DarkGray]	1	4					0	2.8988	705860000	9	0.393325	0.0258864	0.0236623	0.11069	0.0391573	0.0173011	0.0388549	0.039695
	0.0008794	0.0559905	sp|Q8LPU4|HAT1_MAIZE	sp|Q8LPU4|HAT1_MAIZE	Color [DarkGray]	1	4					0	2.8353	121340000	1	0.0559905	0.0008794	0.0187367	0.00688117	0.00438381	0.0153478	0.00541612	0.00659951
	0.00592889	1.52433	sp|Q8LPU5|CMT3_MAIZE	sp|Q8LPU5|CMT3_MAIZE	Color [DarkGray]	1	4				+	0	8.768	84381000	4	1.52433	0.00592889	0.00699254	0.0107936	0.00827195	0	0.00462009	0.00365135
	0.0368319	0.713042	sp|Q8RXK6|RH8_ARATH;sp|Q94BV4|RH6_ARATH;sp|Q9M2E0|RH12_ARATH	sp|Q8RXK6|RH8_ARATH;sp|Q94BV4|RH6_ARATH	Color [DarkGray]	1	4					0	12.809	875500000	16	0.713042	0.0368319	0.0861635	0.0534548	0.113188	0.0791662	0.0361693	0.0269751
	-0.0162391	0.664362	sp|Q8S528|AL2B7_ARATH	sp|Q8S528|AL2B7_ARATH	Color [DarkGray]	1	4					0.0034843	1.0039	362930000	5	0.664362	-0.0162391	0.00851729	0.0335569	0.00357479	0.0197118	0.0398584	0.0347959
+	-1.23737	5.07799	sp|Q8VXG7|PALY_MAIZE	sp|Q8VXG7|PALY_MAIZE	Color [DarkGray]	1	4				+	0	246.16	10143000000	68	5.07799	-1.23737	0.0441032	0.095419	0.0734961	1.28116	1.257	1.38697
	0.0507385	0.638841	sp|Q8W2B7|BX8_MAIZE	sp|Q8W2B7|BX8_MAIZE	Color [DarkGray]	1	4					0	32.475	2816600000	30	0.638841	0.0507385	0.160125	0.240913	0.255432	0.128237	0.192889	0.183129
	0.00479926	0.114538	sp|Q8W4R3|RH30_ARATH	sp|Q8W4R3|RH30_ARATH	Color [DarkGray]	1	4					0	4.3425	641000000	11	0.114538	0.00479926	0.0228752	0.0499635	0.0630979	0.0214793	0.0514113	0.0486482
	0.0234266	0.777499	sp|Q8W519|MMT1_MAIZE	sp|Q8W519|MMT1_MAIZE	Color [DarkGray]	1	4					0	103.77	2373500000	37	0.777499	0.0234266	0.189556	0.166235	0.183886	0.13257	0.16998	0.166847
	0.075239	1.11531	sp|Q94A52|RH2_ARATH;sp|Q9C8J1|RH34_ARATH	sp|Q94A52|RH2_ARATH	Color [DarkGray]	1	4					0	21.526	2295600000	21	1.11531	0.075239	0.148532	0.245629	0.191798	0.115594	0.147581	0.0970671
+	-0.0082087	3.53971	sp|Q9AQU5|PIP13_MAIZE;sp|Q9AR14|PIP15_MAIZE	sp|Q9AQU5|PIP13_MAIZE	Color [DarkGray]	1	4				+	0	1.111	269590000	2	3.53971	-0.0082087	0.0155547	0.0152997	0.0135344	0.0231101	0.0234176	0.0224872
+	-0.0237491	2.01601	sp|Q9ATM2|SIP12_MAIZE	sp|Q9ATM2|SIP12_MAIZE	Color [DarkGray]	1	4				+	0	2.6622	329780000	2	2.01601	-0.0237491	0.0061052	0.00610954	0.0200299	0.0302513	0.0367265	0.0365143
	0.00144319	0.0161761	sp|Q9ATM8|PIP22_MAIZE	sp|Q9ATM8|PIP22_MAIZE	Color [DarkGray]	1	4					0	22.271	842800000	11	0.0161761	0.00144319	0.0332679	0.0977454	0.0330213	0.0154552	0.0849737	0.0592763
	0.0790568	1.3195	sp|Q9AXT8|CMT1_MAIZE	sp|Q9AXT8|CMT1_MAIZE	Color [DarkGray]	1	4				+	0	40.768	1751100000	27	1.3195	0.0790568	0.111069	0.193085	0.173619	0.0566528	0.0815524	0.102399
	0.00133714	0.148529	sp|Q9C551|RH5_ARATH	sp|Q9C551|RH5_ARATH	Color [DarkGray]	1	4					0	1.4322	73860000	1	0.148529	0.00133714	0	0.00759554	0.00825127	0	0.00691889	0.0049165
	-0.00221255	0.0330978	sp|Q9C718|RH20_ARATH	sp|Q9C718|RH20_ARATH	Color [DarkGray]	1	4					0	1.25	608310000	9	0.0330978	-0.00221255	0.00628459	0.0594797	0.046033	0.00800924	0.059718	0.0507078
	0.00603535	0.358882	sp|Q9FJR0|RENT1_ARATH	sp|Q9FJR0|RENT1_ARATH	Color [DarkGray]	1	4					0	20.405	434670000	11	0.358882	0.00603535	0.0198779	0.0391245	0.0384568	0.0213416	0.031901	0.0261105
	0.0468135	1.25781	sp|Q9FPK7|INO1_MAIZE	sp|Q9FPK7|INO1_MAIZE	Color [DarkGray]	1	4					0	89.051	1977800000	41	1.25781	0.0468135	0.131745	0.177712	0.172585	0.0954944	0.11779	0.128318
	0.0171719	0.375715	sp|Q9FQ11|SPP1_MAIZE	sp|Q9FQ11|SPP1_MAIZE	Color [DarkGray]	1	4					0	35.145	1652700000	16	0.375715	0.0171719	0.0956546	0.155162	0.114601	0.0957526	0.119986	0.098163
	-0.00101381	0.126657	sp|Q9FQA3|GST23_MAIZE	sp|Q9FQA3|GST23_MAIZE	Color [DarkGray]	1	4	+				1	-2	49227000	0	0.126657	-0.00101381	0	0.00716679	0	0	0.00519184	0.00501637
	-0.00115395	0.0389535	sp|Q9FT73|MED34_ARATH	sp|Q9FT73|MED34_ARATH	Color [DarkGray]	1	4					0	1.7326	211370000	4	0.0389535	-0.00115395	0.0214348	0.00331686	0.0225201	0.0285668	0.0203245	0.00184225
	0.00826202	0.316534	sp|Q9FUM8|HMT3_MAIZE;sp|Q9FUM9|HMT2_MAIZE	sp|Q9FUM8|HMT3_MAIZE;sp|Q9FUM9|HMT2_MAIZE	Color [DarkGray]	1	4					0	21.749	581890000	8	0.316534	0.00826202	0.0273256	0.0573014	0.0466359	0.0321043	0.0270417	0.0473309
	-0.135609	0.754086	sp|Q9FYS5|HMGYA_MAIZE	sp|Q9FYS5|HMGYA_MAIZE	Color [DarkGray]	1	4					0	79.12	6232400000	92	0.754086	-0.135609	0.446413	0.323746	0.375485	0.644374	0.522041	0.386057
	0.00499664	0.0782178	sp|Q9LEF5|SSRP1_MAIZE	sp|Q9LEF5|SSRP1_MAIZE	Color [DarkGray]	1	4					0	10.431	768580000	14	0.0782178	0.00499664	0.0253872	0.0849781	0.0461386	0.0205414	0.0690174	0.0519551
	0.00258257	0.15465	sp|Q9LIH9|RH51_ARATH	sp|Q9LIH9|RH51_ARATH	Color [DarkGray]	1	4					0	2.5728	143250000	4	0.15465	0.00258257	0.0013977	0.0170545	0.0123454	0	0.00866379	0.0143862
	0.156207	0.311525	sp|Q9M4U5|HDT2_MAIZE	sp|Q9M4U5|HDT2_MAIZE	Color [DarkGray]	1	4					0	77.701	7016800000	31	0.311525	0.156207	0.406568	0.344025	0.980154	0.359044	0.454759	0.448322
	-0.650444	1.86691	sp|Q9SE94|MTHR1_MAIZE	sp|Q9SE94|MTHR1_MAIZE	Color [DarkGray]	1	4				+	0	323.31	29637000000	166	1.86691	-0.650444	1.89308	1.80002	1.63212	2.69158	2.26044	2.32454
+	-1.79651	2.26226	sp|Q9SP22|CALR_MAIZE	sp|Q9SP22|CALR_MAIZE	Color [DarkGray]	1	4				+	0	323.31	60099000000	149	2.26226	-1.79651	3.38041	3.23736	3.26574	4.49376	5.16292	5.61636
	0.00940862	0.298491	sp|Q9SQV1|RH40_ARATH	sp|Q9SQV1|RH40_ARATH	Color [DarkGray]	1	4					0	1.9366	138390000	2	0.298491	0.00940862	0.0347365	0	0.0173329	0.0238435	0	0
+	-0.123192	3.65633	sp|Q9SU63|AL2B4_ARATH	sp|Q9SU63|AL2B4_ARATH	Color [DarkGray]	1	4				+	0	60.199	2566200000	23	3.65633	-0.123192	0.105179	0.110957	0.134504	0.239569	0.246671	0.233977
+	0.304235	2.53714	sp|Q9SX04|MCM32_MAIZE;sp|Q9SX03|MCM33_MAIZE;sp|Q43704|MCM31_MAIZE	sp|Q9SX04|MCM32_MAIZE;sp|Q9SX03|MCM33_MAIZE;sp|Q43704|MCM31_MAIZE	Color [DarkGray]	1	4				+	0	167.7	5960200000	70	2.53714	0.304235	0.496968	0.635896	0.575534	0.220654	0.271863	0.303174
	0.0153625	0.523322	sp|Q9SYP1|DEXHC_ARATH;sp|O48534|DEXHD_ARATH	sp|Q9SYP1|DEXHC_ARATH	Color [DarkGray]	1	4					0	12.674	444660000	7	0.523322	0.0153625	0.0155212	0.0525696	0.0419547	0.00789232	0.0286676	0.0273979
+	-0.0168209	1.9469	sp|Q9TJN6|RR17_MAIZE	sp|Q9TJN6|RR17_MAIZE	Color [DarkGray]	1	4				+	0	3.9608	418150000	4	1.9469	-0.0168209	0.0146993	0.0257939	0.0196616	0.0333469	0.0369693	0.0403012
	-0.0621025	0.171118	sp|Q9XF59|PIP12_MAIZE	sp|Q9XF59|PIP12_MAIZE	Color [DarkGray]	1	4					0	66.922	4457300000	20	0.171118	-0.0621025	0.099182	0.396345	0.271582	0.10416	0.42394	0.425317
	0.000526091	0.0220472	sp|Q9XFH3|MAD2_MAIZE	sp|Q9XFH3|MAD2_MAIZE	Color [DarkGray]	1	4					0	1.8745	58175000	4	0.0220472	0.000526091	0.0176651	0	0	0.0160868	0	0
+	-0.0110852	3.75092	sp|Q9XGD5|CAMT2_MAIZE	sp|Q9XGD5|CAMT2_MAIZE	Color [DarkGray]	1	4				+	0	36.498	80277000	2	3.75092	-0.0110852	0	0	0	0.0127321	0.0101751	0.0103483
+	-0.0805531	2.52043	sp|Q9XGD6|CAMT1_MAIZE	sp|Q9XGD6|CAMT1_MAIZE	Color [DarkGray]	1	4				+	0	134.12	1913300000	26	2.52043	-0.0805531	0.0910898	0.0974591	0.0896106	0.174529	0.193928	0.151362
	0.126995	0.864713	sp|Q9XHR2|EIF3A_MAIZE	sp|Q9XHR2|EIF3A_MAIZE	Color [DarkGray]	1	4					0	64.281	7241400000	64	0.864713	0.126995	0.457544	0.654981	0.580858	0.379705	0.426975	0.505718
	0.00999169	0.481794	sp|Q9ZSV1|PARP1_MAIZE;sp|O50017|PARP2_MAIZE	sp|Q9ZSV1|PARP1_MAIZE	Color [DarkGray]	1	4					0	4.728	248580000	9	0.481794	0.00999169	0.00469565	0.0326181	0.0254345	0.0044061	0.0129185	0.0154486
	0.0604571	0.11135	sp|Q9ZT66|E134_MAIZE	sp|Q9ZT66|E134_MAIZE	Color [DarkGray]	1	4					0	84.994	13798000000	38	0.11135	0.0604571	0.656551	1.16235	1.0826	0.671908	0.997728	1.05049
	0.0102579	0.920208	sp|Q9ZTP4|ZDS_MAIZE	sp|Q9ZTP4|ZDS_MAIZE	Color [DarkGray]	1	4					0	12.437	80535000	2	0.920208	0.0102579	0	0.0138308	0.016943	0	0	0
