# Supplementary material for: Physiological Mechanisms Underlying Tassel Symptom Formation in Maize Infected with Sporisorium reilianum
Source: Plants (Basel). 2024 Jan 15;13(2):238. doi: 10.3390/plants13020238 (PMC10820020; doi:10.3390/plants13020238)
Supplement: Supplementary file 1 [file plants-13-00238-s001.zip › AB_report.xlsx]

## Sheet: Dataset(AB)
Name of datase: AB
No. of identified items: 44 of 44
No. of unidentified items: 0
ID type: ProteinAccesion
Number of mapped protein: 44
Is dataset quantitative :NO
Mapped items:
UniProt accession			UniProt ID	UniProt accession	Protein name	Gene	Alt Accessions
B4F9A4			DMAS1_MAIZE	B4F9A4	Deoxymugineic acid synthase 1 {ECO:0000303|PubMed:16926158}	Name=DMAS1 {ECO:0000303|PubMed:16926158};ORFNames=ZEAMMB73_Zm00001d028360 {ECO:0000312|EMBL:ONL95785.1};	B4F9A4; Q0PCF2;
C0PF72			ARGJ_MAIZE	C0PF72	Arginine biosynthesis bifunctional protein ArgJ, chloroplastic {ECO:0000255|HAMAP-Rule:MF_03124}		C0PF72;
O64411			PAO_MAIZE	O64411	Polyamine oxidase	Name=PAO;	O64411;
P00333			ADH1_MAIZE	P00333	Alcohol dehydrogenase 1	Name=ADH1;	P00333;
P04907			GSTF3_MAIZE	P04907	Glutathione S-transferase 3	Name=GST3;	P04907; P15542;
P06671			CB22_MAIZE	P06671	Chlorophyll a-b binding protein, chloroplastic		P06671;
P11428			SODC2_MAIZE	P11428	Superoxide dismutase [Cu-Zn] 2	Name=SODCC.1; Synonyms=SOD2;	P11428;
P12329			CB21_MAIZE	P12329	Chlorophyll a-b binding protein 1, chloroplastic	Name=CAB1;	P12329;
P16243			MAOC_MAIZE	P16243	NADP-dependent malic enzyme, chloroplastic	Name=MOD1; Synonyms=ME1;	P16243;
P18122			CATA1_MAIZE	P18122	Catalase isozyme 1	Name=CAT1;	P18122;
P18123			CATA3_MAIZE	P18123	Catalase isozyme 3	Name=CAT3;	P18123;
P19656			NLTP_MAIZE	P19656	Non-specific lipid-transfer protein		P19656;
P22275			TBA3_MAIZE	P22275	Tubulin alpha-3 chain	Name=TUBA3; Synonyms=TUA3;	P22275;
P23225			GLTB_MAIZE	P23225	Ferredoxin-dependent glutamate synthase, chloroplastic	Name=GLSF;	P23225;
P23345			SODC4_MAIZE	P23345	Superoxide dismutase [Cu-Zn] 4A	Name=SODCC.3; Synonyms=SOD4A;	P23345;
P23346			SODC5_MAIZE	P23346	Superoxide dismutase [Cu-Zn] 4AP	Name=SODCC.2; Synonyms=SOD4AP;	P23346;
P27497			CB29_MAIZE	P27497	Chlorophyll a-b binding protein M9, chloroplastic	Name=CAB-M9;	P27497;
P33679			ZEAM_MAIZE	P33679	Zeamatin	Name=Zlp;	P33679;
P48187			PSBC_MAIZE	P48187	Photosystem II CP43 reaction center protein {ECO:0000255|HAMAP-Rule:MF_01496}	Name=psbC {ECO:0000255|HAMAP-Rule:MF_01496};	P48187;
P49106			14331_MAIZE	P49106	14-3-3-like protein GF14-6	Name=GRF1;	P49106;
P49175			INV1_MAIZE	P49175	Beta-fructofuranosidase 1	Name=IVR1;	P49175;
P49235			HGGL1_MAIZE	P49235	4-hydroxy-7-methoxy-3-oxo-3,4-dihydro-2H-1,4-benzoxazin-2-yl glucoside beta-D-glucosidase 1, chloroplastic	Name=GLU1;	P49235;
P49353			FPPS_MAIZE	P49353	Farnesyl pyrophosphate synthase	Name=FPS;	P49353;
P51059			CAPP2_MAIZE	P51059	Phosphoenolpyruvate carboxylase 2	Name=PEP4; Synonyms=PEP;	P51059;
P52580			IFRH_MAIZE	P52580	Isoflavone reductase homolog IRL	Name=IRL;	P52580;
P55234			GLGL2_MAIZE	P55234	Glucose-1-phosphate adenylyltransferase large subunit 2, chloroplastic/amyloplastic	Name=AGP2;	P55234;
Q05761			RS13_MAIZE	Q05761	40S ribosomal protein S13	Name=RPS13;	Q05761;
Q06509			COMT1_MAIZE	Q06509	Caffeic acid 3-O-methyltransferase		Q06509;
Q41048			PSBQ1_MAIZE	Q41048	Oxygen-evolving enhancer protein 3-1, chloroplastic	Name=PSBQ1; Synonyms=PSBQ;	Q41048;
Q41761			HGGL2_MAIZE	Q41761	4-hydroxy-7-methoxy-3-oxo-3,4-dihydro-2H-1,4-benzoxazin-2-yl glucoside beta-D-glucosidase 2, chloroplastic	Name=GLU2;	Q41761;
Q41783			TBB6_MAIZE	Q41783	Tubulin beta-6 chain	Name=TUBB6; Synonyms=TUB6;	Q41783;
Q43255			C71C2_MAIZE	Q43255	indolin-2-one monooxygenase	Name=CYP71C2; Synonyms=BX3;	Q43255; O04991;
Q43266			PCNA_MAIZE	Q43266	Proliferating cell nuclear antigen	Name=PCNA;	Q43266;
Q43270			PLDA1_MAIZE	Q43270	Phospholipase D alpha 1	Name=PLD1;	Q43270;
Q84Y01			ITPK1_MAIZE	Q84Y01	Inositol-tetrakisphosphate 1-kinase 1	Name=ITPK1; Synonyms=LPA2;	Q84Y01;
Q8VXG7			PALY_MAIZE	Q8VXG7	Phenylalanine/tyrosine ammonia-lyase	Name=PAL1;	Q8VXG7;
Q9AQU5			PIP13_MAIZE	Q9AQU5	Aquaporin PIP1-3/PIP1-4	Name=PIP1-3;andName=PIP1-4;	Q9AQU5;
Q9ATM2			SIP12_MAIZE	Q9ATM2	Aquaporin SIP1-2	Name=SIP1-2; Synonyms=SIP1B;	Q9ATM2;
Q9SP22			CALR_MAIZE	Q9SP22	Calreticulin	Name=CRT;	Q9SP22;
Q9SU63			AL2B4_ARATH	Q9SU63	Aldehyde dehydrogenase family 2 member B4, mitochondrial	Name=ALDH2B4; Synonyms=ALDH2; OrderedLocusNames=At3g48000;ORFNames=T17F15.130;	Q9SU63; Q42090;
Q9SX04			MCM32_MAIZE	Q9SX04	DNA replication licensing factor MCM3 homolog 2	Name=ROA2;	Q9SX04;
Q9TJN6			RR17_MAIZE	Q9TJN6	30S ribosomal protein S17, chloroplastic	Name=RPS17; Synonyms=HCF60;	Q9TJN6;
Q9XGD5			CAMT2_MAIZE	Q9XGD5	Caffeoyl-CoA O-methyltransferase 2	Name=CCOAOMT2;	Q9XGD5;
Q9XGD6			CAMT1_MAIZE	Q9XGD6	Caffeoyl-CoA O-methyltransferase 1	Name=CCOAOMT1;	Q9XGD6;

## Sheet: Cellular component
Analysis: Cellular component
Dataset name: AB
Number of proteins in the dataset: 44
Number of proteins in the dataset (which are available in Cellular component database) :37
Number of proteins in background: 41689
Is analysis quantitative: No
						Corrected p-values
Cellular component	No. of genes in the dataset	No.of genes in the background dataset	Percentage of proteins	Fold enrichment	P-value (Hypergeometric test)	Bonferroni method	BH method	Q-value (Storey-Tibshirani method)
cytosol	1	1795	2.27273	0.532997	0.85594	1	1	1	Q9AQU5;
mitochondrion	2	1392	4.54545	1.3678	0.434569	1	1	1	P18123; Q9SU63;
nucleus	3	5364	6.81818	0.531554	0.934454	1	1	1	P49106; Q43266; Q9SX04;
plasma membrane	1	2958	2.27273	0.323439	0.960836	1	1	1	Q9AQU5;
cytoplasm	10	3544	22.7273	2.67553	0.00327744	1	1	1	P00333; P11428; P22275; P23345; P23346; P49353; P51059; P52580; Q41783; Q8VXG7;
chloroplast	6	8175	13.6364	0.696396	0.88689	1	1	1	P16243; P49235; P55234; Q41761; Q9SU63; Q9TJN6;
integral component of membrane	8	9869	18.1818	0.768828	0.850498	1	1	1	P06671; P12329; P27497; P48187; P49175; Q43255; Q9AQU5; Q9ATM2;
peroxisome	1	224	2.27273	4.27095	0.211149	1	1	1	P18122;
chloroplast stroma	2	1093	4.54545	1.74198	0.321291	1	1	1	C0PF72; P23225;
membrane	1	1114	2.27273	0.858821	0.696499	1	1	1	Q43270;
mitochondrial matrix	1	171	2.27273	5.59461	0.165518	1	1	1	Q9SU63;
amyloplast	1	82	2.27273	11.6661	0.0830255	1	1	1	P55234;
vacuolar lumen	1	16	2.27273	59.7586	0.0167569	1	1	1	P49175;
intracellular	1	289	2.27273	3.31039	0.263791	1	1	1	Q84Y01;
chloroplast thylakoid membrane	5	6485	11.3636	0.731808	0.835418	1	1	1	P06671; P12329; P27497; P48187; Q41048;
endoplasmic reticulum lumen	1	98	2.27273	9.7616	0.0984212	1	1	1	Q9SP22;
protein complex	1	48	2.27273	19.9278	0.0494516	1	1	1	P04907;
extrinsic component of membrane	1	78	2.27273	12.2643	0.0791366	1	1	1	Q41048;
microtubule	2	358	4.54545	5.31828	0.0549269	1	1	1	P22275; Q41783;
photosystem II	4	968	9.09091	3.92405	0.0188053	1	1	1	P06671; P12329; P27497; P48187;
photosystem I	3	844	6.81818	3.37823	0.0593933	1	1	1	P06671; P12329; P27497;
ribosome	2	1891	4.54545	1.00687	0.599272	1	1	1	Q05761; Q9TJN6;
MCM complex	1	21	2.27273	45.5371	0.021937	1	1	1	Q9SX04;
photosystem II oxygen evolving complex	1	83	2.27273	11.5255	0.0839952	1	1	1	Q41048;

## Sheet: Molecular function
Analysis: Molecular function
Dataset name: AB
Number of proteins in the dataset: 44
Number of proteins in the dataset (which are available in Molecular function database) :43
Number of proteins in background: 41689
Is analysis quantitative: No
						Corrected p-values
Molecular function	No. of genes in the dataset	No.of genes in the background dataset	Percentage of proteins	Fold enrichment	P-value (Hypergeometric test)	Bonferroni method	BH method	Q-value (Storey-Tibshirani method)
zinc ion binding	1	683	2.27273	1.40076	0.516745	1	1	1	P00333;
metal ion binding	14	5156	31.8182	2.57392	0.000585778	1	0.160661	1	P06671; P11428; P12329; P16243; P18122; P18123; P23225; P23345; P23346; P27497; P48187; P49353; Q9XGD5; Q9XGD6;
ATP binding	4	4173	9.09091	0.910259	0.654363	1	1	1	P55234; Q84Y01; Q9SU63; Q9SX04;
protein domain specific binding	1	122	2.27273	7.84145	0.121042	1	1	1	P49106;
DNA binding	3	2568	6.81818	1.1103	0.514516	1	1	1	P49106; Q43266; Q9SX04;
protein complex binding	1	13	2.27273	73.5384	0.013636	1	1	1	P49106;
oxidoreductase activity	1	588	2.27273	1.62707	0.46492	1	1	1	P52580;
protein homodimerization activity	1	281	2.27273	3.40463	0.257502	1	1	1	P04907;
protein dimerization activity	1	600	2.27273	1.59453	0.471754	1	1	1	Q06509;
calcium ion binding	3	488	6.81818	5.84262	0.0148028	1	1	1	Q41048; Q43270; Q9SP22;
magnesium ion binding	1	1006	2.27273	0.951019	0.658821	1	1	1	Q84Y01;
NAD binding	1	262	2.27273	3.65152	0.242355	1	1	1	P16243;
carbohydrate binding	1	403	2.27273	2.37397	0.347948	1	1	1	Q9SP22;
heme binding	3	1333	6.81818	2.13896	0.165707	1	1	1	P18122; P18123; Q43255;
iron ion binding	1	729	2.27273	1.31238	0.540043	1	1	1	Q43255;
transporter activity	2	175	4.54545	10.8794	0.0147657	1	1	1	Q9AQU5; Q9ATM2;
alcohol dehydrogenase (NAD) activity	1	36	2.27273	26.5686	0.0373176	1	1	1	P00333;
lipid binding	1	395	2.27273	2.42205	0.342362	1	1	1	P19656;
structural constituent of cytoskeleton	2	134	4.54545	14.2079	0.00888108	1	0.973366	1	P22275; Q41783;
aldehyde dehydrogenase (NAD) activity	1	14	2.27273	68.2894	0.0146774	1	1	1	Q9SU63;
glucose-1-phosphate adenylyltransferase activity	1	34	2.27273	28.131	0.0352805	1	1	1	P55234;
GTPase activity	2	455	4.54545	4.18452	0.0833283	1	1	1	P22275; Q41783;
GTP binding	2	597	4.54545	3.18922	0.130931	1	1	1	P22275; Q41783;
acetyl-CoA:L-glutamate N-acetyltransferase activity	1	15	2.27273	63.7398	0.0157177	1	1	1	C0PF72;
glutamate N-acetyltransferase activity	1	13	2.27273	73.5384	0.013636	1	1	1	C0PF72;
methione N-acyltransferase activity	1	15	2.27273	63.7398	0.0157177	1	1	1	C0PF72;
acetylserotonin O-methyltransferase activity	1	6	2.27273	159.19	0.0063163	1	0.721111	1	Q06509;
structural constituent of ribosome	2	3667	4.54545	0.519223	0.908869	1	1	1	Q05761; Q9TJN6;
beta-glucosidase activity	2	108	4.54545	17.628	0.00585927	1	0.721111	1	P49235; Q41761;
scopolin beta-glucosidase activity	2	87	4.54545	21.8825	0.00384718	1	0.501965	1	P49235; Q41761;
fucosidase activity	1	2	2.27273	475.987	0.00210978	1	0.304252	1	P49235;
unfolded protein binding	1	117	2.27273	8.17652	0.116376	1	1	1	Q9SP22;
rRNA binding	1	2319	2.27273	0.412562	0.919508	1	1	1	Q9TJN6;
helicase activity	1	89	2.27273	10.7486	0.0897925	1	1	1	Q9SX04;
indolin-2-one monooxygenase activity	1	1	2.27273	947.262	0.00105543	1	0.160661	1	Q43255;
chlorophyll binding	4	911	9.09091	4.16957	0.0153961	1	1	1	P06671; P12329; P27497; P48187;
caffeoyl-CoA O-methyltransferase activity	2	29	4.54545	65.6324	0.000434053	1	0.160661	1	Q9XGD5; Q9XGD6;
phosphoenolpyruvate carboxylase activity	1	27	2.27273	35.4215	0.0281178	1	1	1	P51059;
catalase activity	2	41	4.54545	46.4276	0.000869634	1	0.160661	1	P18122; P18123;
dimethylallyltranstransferase activity	1	27	2.27273	35.4215	0.0281178	1	1	1	P49353;
sucrose alpha-glucosidase activity	1	44	2.27273	21.739	0.0454236	1	1	1	P49175;
caffeate O-methyltransferase activity	1	22	2.27273	43.4682	0.0229698	1	1	1	Q06509;
luteolin O-methyltransferase activity	1	3	2.27273	317.852	0.00316304	1	0.433336	1	Q06509;
NADPH binding	1	13	2.27273	73.5384	0.013636	1	1	1	P52580;
glutathione transferase activity	1	97	2.27273	9.86223	0.0974664	1	1	1	P04907;
3''-deamino-3''-oxonicotianamine reductase activity	1	6	2.27273	159.19	0.0063163	1	0.721111	1	B4F9A4;
electron transporter, transferring electrons within the cyclic electron transport pathway of photosynthesis activity	1	632	2.27273	1.5138	0.489565	1	1	1	P48187;
geranyltranstransferase activity	1	27	2.27273	35.4215	0.0281178	1	1	1	P49353;
3 iron, 4 sulfur cluster binding	1	25	2.27273	38.2541	0.0260618	1	1	1	P23225;
glutamate synthase (ferredoxin) activity	1	10	2.27273	95.5779	0.0105055	1	1	1	P23225;
cellulose 1,4-beta-cellobiosidase activity	1	1	2.27273	947.262	0.00105543	1	0.160661	1	P49235;
DIMBOA glucoside beta-D-glucosidase activity	2	7	4.54545	271.612	2.2785e-05	0.0624309	0.0624309	0.421165	P49235; Q41761;
galactosidase activity	1	1	2.27273	947.262	0.00105543	1	0.160661	1	P49235;
mannosidase activity	1	1	2.27273	947.262	0.00105543	1	0.160661	1	P49235;
xylanase activity	1	1	2.27273	947.262	0.00105543	1	0.160661	1	P49235;
inositol-1,3,4-trisphosphate 6-kinase activity	1	18	2.27273	53.1224	0.0188321	1	1	1	Q84Y01;
inositol tetrakisphosphate 1-kinase activity	1	17	2.27273	56.2454	0.0177951	1	1	1	Q84Y01;
inositol-1,3,4-trisphosphate 5-kinase activity	1	17	2.27273	56.2454	0.0177951	1	1	1	Q84Y01;
inositol tetrakisphosphate 6-kinase activity	1	1	2.27273	947.262	0.00105543	1	0.160661	1	Q84Y01;
inositol-1,3,4,5-tetrakisphosphate 3-phosphatase activity	1	1	2.27273	947.262	0.00105543	1	0.160661	1	Q84Y01;
malate dehydrogenase (decarboxylating) (NAD+) activity	1	18	2.27273	53.1224	0.0188321	1	1	1	P16243;
malate dehydrogenase (decarboxylating) (NADP+) activity	1	14	2.27273	68.2894	0.0146774	1	1	1	P16243;
oxaloacetate decarboxylase activity	1	17	2.27273	56.2454	0.0177951	1	1	1	P16243;
superoxide dismutase activity	3	72	6.81818	39.5953	6.21705e-05	0.170347	0.0851736	0.574589	P11428; P23345; P23346;
phenylalanine ammonia-lyase activity	1	51	2.27273	18.7558	0.0524617	1	1	1	Q8VXG7;
tyrosine ammonia-lyase activity	1	1	2.27273	947.262	0.00105543	1	0.160661	1	Q8VXG7;
N1-acetylspermidine:oxygen oxidoreductase (propane-1,3-diamine-forming) activity	1	1	2.27273	947.262	0.00105543	1	0.160661	1	O64411;
N1-acetylspermine:oxygen oxidoreductase (propane-1,3-diamine-forming) activity	1	1	2.27273	947.262	0.00105543	1	0.160661	1	O64411;
N8-acetylspermidine:oxygen oxidoreductase (propane-1,3-diamine-forming) activity	1	1	2.27273	947.262	0.00105543	1	0.160661	1	O64411;
spermidine oxidase (propane-1,3-diamine-forming) activity	1	1	2.27273	947.262	0.00105543	1	0.160661	1	O64411;
spermine oxidase (propane-1,3-diamine-forming) activity	1	1	2.27273	947.262	0.00105543	1	0.160661	1	O64411;
DNA polymerase processivity factor activity	1	12	2.27273	79.6615	0.0125936	1	1	1	Q43266;
N-acylphosphatidylethanolamine-specific phospholipase D activity	1	24	2.27273	39.8473	0.0250322	1	1	1	Q43270;
phospholipase D activity	1	24	2.27273	39.8473	0.0250322	1	1	1	Q43270;

## Sheet: Biological process
Analysis: Biological process
Dataset name: AB
Number of proteins in the dataset: 44
Number of proteins in the dataset (which are available in Biological process database) :35
Number of proteins in background: 41689
Is analysis quantitative: No
						Corrected p-values
Biological process	No. of genes in the dataset	No.of genes in the background dataset	Percentage of proteins	Fold enrichment	P-value (Hypergeometric test)	Bonferroni method	BH method	Q-value (Storey-Tibshirani method)
response to abscisic acid	1	389	2.27273	2.45941	0.338143	1	1	1	P18122;
negative regulation of protein serine/threonine kinase activity	1	3	2.27273	317.852	0.00316304	1	1	1	P49106;
regulation of gene expression	1	113	2.27273	8.46593	0.112625	1	1	1	P49106;
cold acclimation	2	53	4.54545	35.9177	0.00144971	1	0.656174	1	P18122; P18123;
response to cadmium ion	1	309	2.27273	3.09613	0.279286	1	1	1	Q9SU63;
response to auxin	2	233	4.54545	8.17131	0.0252243	1	1	1	P18122; P18123;
response to oxidative stress	2	334	4.54545	5.70042	0.0485581	1	1	1	P18122; P18123;
carbohydrate metabolic process	2	454	4.54545	4.19373	0.083016	1	1	1	P49235; Q41761;
defense response to fungus	1	670	2.27273	1.42794	0.509954	1	1	1	P33679;
killing of cells of other organism	1	482	2.27273	1.98489	0.400673	1	1	1	P33679;
phenylpropanoid biosynthetic process	1	15	2.27273	63.7398	0.0157177	1	1	1	Q8VXG7;
protein homotetramerization	2	20	4.54545	95.1523	0.000204359	0.739982	0.246661	1	P18122; P18123;
tricarboxylic acid cycle	1	159	2.27273	6.01682	0.154834	1	1	1	P51059;
lipid transport	1	159	2.27273	6.01682	0.154834	1	1	1	P19656;
lipid catabolic process	1	225	2.27273	4.25197	0.211986	1	1	1	Q43270;
response to iron ion starvation	1	17	2.27273	56.2454	0.0177951	1	1	1	B4F9A4;
circadian rhythm	1	91	2.27273	10.5124	0.0917169	1	1	1	P18123;
response to reactive oxygen species	2	43	4.54545	44.2687	0.000956375	1	0.545961	1	P18122; P18123;
response to gibberellin	1	92	2.27273	10.3982	0.0926776	1	1	1	Q8VXG7;
seed development	1	81	2.27273	11.8101	0.0820548	1	1	1	Q84Y01;
photosynthesis	2	2977	4.54545	0.639567	0.831844	1	1	1	P51059; Q41048;
glutamine metabolic process	1	53	2.27273	18.0482	0.0544632	1	1	1	P23225;
protein-chromophore linkage	4	1046	9.09091	3.63144	0.0241832	1	1	1	P06671; P12329; P27497; P48187;
cytokinin-activated signaling pathway	1	133	2.27273	7.19295	0.131224	1	1	1	P49235;
cell cycle	1	296	2.27273	3.2321	0.269251	1	1	1	Q9SX04;
protein folding	1	167	2.27273	5.72861	0.161971	1	1	1	Q9SP22;
glycogen biosynthetic process	1	34	2.27273	28.131	0.0352805	1	1	1	P55234;
hydrogen peroxide catabolic process	2	225	4.54545	8.46183	0.0236431	1	1	1	P18122; P18123;
arginine biosynthetic process	1	37	2.27273	25.8507	0.0383345	1	1	1	C0PF72;
response to herbicide	1	180	2.27273	5.3149	0.173444	1	1	1	P04907;
sucrose metabolic process	1	66	2.27273	14.4938	0.0673729	1	1	1	P49175;
melatonin biosynthetic process	1	10	2.27273	95.5779	0.0105055	1	1	1	Q06509;
lignin biosynthetic process	3	120	6.81818	23.7585	0.000282596	1	0.25582	1	Q06509; Q9XGD5; Q9XGD6;
translation	2	3603	4.54545	0.528446	0.903383	1	1	1	Q05761; Q9TJN6;
protein arginylation	1	3	2.27273	317.852	0.00316304	1	1	1	Q8VXG7;
photosynthetic electron transport in photosystem II	1	545	2.27273	1.75544	0.439713	1	1	1	P48187;
regulation of DNA replication	1	18	2.27273	53.1224	0.0188321	1	1	1	Q43266;
DNA replication	1	103	2.27273	9.28779	0.10318	1	1	1	Q43266;
carbon fixation	1	36	2.27273	26.5686	0.0373176	1	1	1	P51059;
protein heterotetramerization	1	8	2.27273	119.443	0.00841305	1	1	1	P18122;
response to xenobiotic stimulus	2	7	4.54545	271.612	2.2785e-05	0.0825045	0.0825045	0.562407	P18122; P18123;
photosynthesis, light harvesting	3	75	6.81818	38.0117	7.02348e-05	0.25432	0.12716	0.866809	P06671; P12329; P27497;
starch biosynthetic process	1	111	2.27273	8.61846	0.110744	1	1	1	P55234;
DNA replication initiation	1	39	2.27273	24.5254	0.0403652	1	1	1	Q9SX04;
flavonol biosynthetic process	1	12	2.27273	79.6615	0.0125936	1	1	1	Q06509;
cellular response to zinc ion starvation	1	5	2.27273	190.965	0.0052663	1	1	1	B4F9A4;
siderophore biosynthetic process	1	6	2.27273	159.19	0.0063163	1	1	1	B4F9A4;
microtubule-based process	2	120	4.54545	15.8653	0.00718272	1	1	1	P22275; Q41783;
L-phenylalanine catabolic process	1	60	2.27273	15.9429	0.0614362	1	1	1	Q8VXG7;
cholesterol biosynthetic process	1	10	2.27273	95.5779	0.0105055	1	1	1	P49353;
farnesyl diphosphate biosynthetic process	1	26	2.27273	36.7833	0.0270903	1	1	1	P49353;
geranyl diphosphate biosynthetic process	1	26	2.27273	36.7833	0.0270903	1	1	1	P49353;
L-glutamate biosynthetic process	1	14	2.27273	68.2894	0.0146774	1	1	1	P23225;
cellular response to sulfur starvation	1	8	2.27273	119.443	0.00841305	1	1	1	P52580;
myo-inositol hexakisphosphate biosynthetic process	1	16	2.27273	59.7586	0.0167569	1	1	1	Q84Y01;
inositol trisphosphate metabolic process	1	20	2.27273	47.8128	0.0209031	1	1	1	Q84Y01;
response to cycloheximide	1	7	2.27273	136.481	0.00736522	1	1	1	Q8VXG7;
cinnamic acid biosynthetic process	1	52	2.27273	18.3952	0.053463	1	1	1	Q8VXG7;
phosphatidylcholine metabolic process	1	21	2.27273	45.5371	0.021937	1	1	1	Q43270;
negative regulation of growth of symbiont in host	1	1	2.27273	947.262	0.00105543	1	0.545961	1	P33679;
positive regulation by host of cytolysis of symbiont cells	1	1	2.27273	947.262	0.00105543	1	0.545961	1	P33679;

## Sheet: Protein domain
Analysis: Protein domain
Dataset name: AB
Number of proteins in the dataset: 44
Number of proteins in the dataset (which are available in Protein domain database) :12
Number of proteins in background: 41689
Is analysis quantitative: No
						Corrected p-values
Protein domain	No. of genes in the dataset	No.of genes in the background dataset	Percentage of proteins	Fold enrichment	P-value (Hypergeometric test)	Bonferroni method	BH method	Q-value (Storey-Tibshirani method)
AAI	1	229	2.27273	4.1777	0.215325	1	1	1	P19656;
14_3_3	1	59	2.27273	16.2131	0.0604431	1	1	1	P49106;
Glyco_32	1	47	2.27273	20.3517	0.0484462	1	1	1	P49175;
AAA	1	714	2.27273	1.33995	0.532569	1	1	1	Q9SX04;
C2	1	73	2.27273	13.1042	0.0742528	1	1	1	Q43270;
THN	1	40	2.27273	23.9124	0.041379	1	1	1	P33679;
Catalase	2	41	4.54545	46.4276	0.000869634	0.543521	0.543521	1	P18122; P18123;
Tubulin	2	124	4.54545	15.3536	0.0076512	1	1	1	P22275; Q41783;
Tubulin_C	2	124	4.54545	15.3536	0.0076512	1	1	1	P22275; Q41783;
malic	1	18	2.27273	53.1224	0.0188321	1	1	1	P16243;
Malic_M	1	18	2.27273	53.1224	0.0188321	1	1	1	P16243;
MCM	1	26	2.27273	36.7833	0.0270903	1	1	1	Q9SX04;
PLDc	1	24	2.27273	39.8473	0.0250322	1	1	1	Q43270;
Ribosomal_S15	1	108	2.27273	8.85784	0.107915	1	1	1	Q05761;
Ribosomal_S13_N	1	7	2.27273	136.481	0.00736522	1	1	1	Q05761;
