# Supplementary material for: Physiological Mechanisms Underlying Tassel Symptom Formation in Maize Infected with Sporisorium reilianum
Source: Plants (Basel). 2024 Jan 15;13(2):238. doi: 10.3390/plants13020238 (PMC10820020; doi:10.3390/plants13020238)
Supplement: Supplementary file 1 [file plants-13-00238-s001.zip › AC.xls]

## Sheet: perseus-result
Significant	Difference	-Log(P-value)	Protein IDs	Majority protein IDs	Symbol color	Symbol type	Symbol size	Only identified by site	Reverse	Potential contaminant	t-test Significant	Q-value	Score	Intensity	MS/MS Count	-Log t-test p-value	t-test Difference	A1	A2	A3	C1	C2	C3
	0.0202708	0.150166	sp|A0A1D6LAB7|RH3B_MAIZE	sp|A0A1D6LAB7|RH3B_MAIZE	Color [DarkGray]	1	4					0	2.5868	37881000	2	0.150166	0.0202708	0.14446	0	0	0	0.0342565	0.0493913
+	2.22626	2.17462	sp|A1Y2B7|SGS3_MAIZE	sp|A1Y2B7|SGS3_MAIZE	Color [DarkGray]	1	4				+	0	37.427	1815500000	31	2.17462	2.22626	1.86963	3.18284	3.14197	0.48487	0.529723	0.501064
+	-0.0643819	0.91394	sp|A4KA61|PRO12_MAIZE;sp|A4KA60|PRO11_MAIZE;sp|A4KA56|PROF7_MAIZE	sp|A4KA61|PRO12_MAIZE;sp|A4KA60|PRO11_MAIZE;sp|A4KA56|PROF7_MAIZE	Color [DarkGray]	1	4					0	28.453	57718000	2	0.91394	-0.0643819	0	0	0	0	0.108267	0.0848792
+	-0.732592	1.49194	sp|A4KA58|PROF9_MAIZE;sp|A4KA59|PRO10_MAIZE	sp|A4KA58|PROF9_MAIZE;sp|A4KA59|PRO10_MAIZE	Color [DarkGray]	1	4				+	0	86.316	673340000	12	1.49194	-0.732592	0	0.0329569	0	0.290961	1.00263	0.937145
+	-0.264691	1.20539	sp|A5H453|PER42_MAIZE	sp|A5H453|PER42_MAIZE	Color [DarkGray]	1	4					0	4.5967	238990000	7	1.20539	-0.264691	0	0	0	0.471091	0.161167	0.161816
	-0.0526119	0.160644	sp|A5H8G4|PER1_MAIZE	sp|A5H8G4|PER1_MAIZE	Color [DarkGray]	1	4					0	28.992	811270000	22	0.160644	-0.0526119	0.352284	0.718976	0.560255	0.522482	0.547138	0.719732
+	2.90879	2.03077	sp|B1P123|BX7_MAIZE	sp|B1P123|BX7_MAIZE	Color [DarkGray]	1	4				+	0	152.62	4305500000	56	2.03077	2.90879	4.74917	5.4834	4.87533	3.09942	1.10576	2.17636
+	0.267465	2.15094	sp|B2LXS7|WHY1_MAIZE	sp|B2LXS7|WHY1_MAIZE	Color [DarkGray]	1	4				+	0	1.5242	159110000	2	2.15094	0.267465	0.391822	0.220037	0.288452	0.0541502	0.0437652	0
+	0.205368	1.20266	sp|B4FBQ7|CSPL6_MAIZE	sp|B4FBQ7|CSPL6_MAIZE	Color [DarkGray]	1	4					0	45.434	114110000	2	1.20266	0.205368	0.308914	0.2879	0.0621928	0.0429028	0	0
	0.252321	0.628281	sp|B4FHF0|EFTS_MAIZE	sp|B4FHF0|EFTS_MAIZE	Color [DarkGray]	1	4					0	3.4906	381000000	5	0.628281	0.252321	0.817407	0.296853	0.297868	0.261574	0.115985	0.277606
	0.00191255	0.0462721	sp|B4FR29|RAF1_MAIZE	sp|B4FR29|RAF1_MAIZE	Color [DarkGray]	1	4					0	1.0333	14923000	1	0.0462721	0.00191255	0	0.0327246	0	0	0	0.026987
+	22.1121	4.74941	sp|B4G072|BX9_MAIZE;sp|P80623|UC17_MAIZE	sp|B4G072|BX9_MAIZE	Color [DarkGray]	1	4				+	0	180.34	21651000000	116	4.74941	22.1121	29.687	29.8356	31.6521	6.98444	9.22101	8.63302
+	1.91914	2.13774	sp|B4G0F3|MTBC_MAIZE	sp|B4G0F3|MTBC_MAIZE	Color [DarkGray]	1	4				+	0	28.796	2524200000	37	2.13774	1.91914	3.12702	3.60244	2.53521	0.75956	1.52658	1.22111
+	-0.00892935	2.12063	sp|B6SGC5|CNR6_MAIZE	sp|B6SGC5|CNR6_MAIZE	Color [DarkGray]	1	4				+	0	1.074	10459000	1	2.12063	-0.00892935	0	0	0.00535525	0.0105676	0.0105575	0.0110182
+	0.0274462	0.985044	sp|B6SHG7|TRMB_MAIZE	sp|B6SHG7|TRMB_MAIZE	Color [DarkGray]	1	4					0.002994	0.86819	43523000	2	0.985044	0.0274462	0.0663505	0.0424268	0.0441794	0.0445906	0.0117383	0.0142893
+	-0.0481696	2.73119	sp|B6SXH2|URM1_MAIZE	sp|B6SXH2|URM1_MAIZE	Color [DarkGray]	1	4				+	0.0086705	0.63308	43096000	1	2.73119	-0.0481696	0	0	0	0.0364023	0.0489347	0.0591719
+	1.14993	1.95555	sp|B6TB21|DRE2_MAIZE	sp|B6TB21|DRE2_MAIZE	Color [DarkGray]	1	4				+	0	23.659	1031100000	16	1.95555	1.14993	1.07652	1.79585	1.56591	0.0425402	0.430031	0.515923
	1.39513	0.531598	sp|B6TNW8|ITPA_MAIZE	sp|B6TNW8|ITPA_MAIZE	Color [DarkGray]	1	4					0	16.562	517300000	9	0.531598	1.39513	3.77121	0.334155	0.272493	0.0897086	0.0504783	0.0522899
+	0.360157	1.32989	sp|B6TTW1|CYNS_MAIZE	sp|B6TTW1|CYNS_MAIZE	Color [DarkGray]	1	4				+	0	17.95	337530000	8	1.32989	0.360157	0.269629	0.658181	0.47421	0.11843	0	0.203118
+	-0.223422	1.06324	sp|B6TVL4|CAS_MAIZE	sp|B6TVL4|CAS_MAIZE	Color [DarkGray]	1	4					0	3.6357	268260000	6	1.06324	-0.223422	0	0	0.147169	0.116268	0.411707	0.289459
+	1.73556	2.10015	sp|B6TZD1|MTNA_MAIZE	sp|B6TZD1|MTNA_MAIZE	Color [DarkGray]	1	4				+	0	177.67	3578600000	43	2.10015	1.73556	3.66196	4.1843	3.37753	2.37807	1.49985	2.13917
	-0.012724	0.0830803	sp|B6U151|GATA_MAIZE	sp|B6U151|GATA_MAIZE	Color [DarkGray]	1	4					0	1.0585	82156000	3	0.0830803	-0.012724	0	0.136955	0	0	0.0865542	0.088573
+	0.411078	1.92454	sp|C0PF72|ARGJ_MAIZE	sp|C0PF72|ARGJ_MAIZE	Color [DarkGray]	1	4				+	0	20.982	507640000	14	1.92454	0.411078	0.812225	0.591785	0.552352	0.336465	0.196835	0.189829
+	-0.0862902	0.929748	sp|D9HP23|CNR7_MAIZE	sp|D9HP23|CNR7_MAIZE	Color [DarkGray]	1	4					0	3.8007	79138000	1	0.929748	-0.0862902	0	0	0	0.137233	0.121638	0
+	0.386497	1.72648	sp|F4IHS2|SYD_ARATH	sp|F4IHS2|SYD_ARATH	Color [DarkGray]	1	4				+	0	1.0965	253300000	4	1.72648	0.386497	0.643137	0.361282	0.354855	0	0.116637	0.0831456
	0.19204	0.733244	sp|F4JRJ6|DEAH9_ARATH	sp|F4JRJ6|DEAH9_ARATH	Color [DarkGray]	1	4					0.0085714	0.55461	160670000	1	0.733244	0.19204	0	0.295915	0.393744	0	0.0672126	0.0463253
	0.0404426	0.427243	sp|K7U9N8|OP1_MAIZE	sp|K7U9N8|OP1_MAIZE	Color [DarkGray]	1	4					0	2.1377	19006000	2	0.427243	0.0404426	0	0	0.121328	0	0	0
+	27.8241	4.4945	sp|O22424|RS4_MAIZE	sp|O22424|RS4_MAIZE	Color [DarkGray]	1	4				+	0	174.43	26822000000	111	4.4945	27.8241	38.8869	38.7108	36.3422	10.4796	8.1748	11.8131
+	7.63973	1.91402	sp|Q9FR39|PROF5_MAIZE;sp|O22655|PROF4_MAIZE	sp|Q9FR39|PROF5_MAIZE;sp|O22655|PROF4_MAIZE	Color [DarkGray]	1	4				+	0	35.42	6979700000	35	1.91402	7.63973	13.661	8.11831	9.38781	3.74967	2.54072	1.95751
+	0.169017	2.83927	sp|Q9LZQ9|DEAH2_ARATH;sp|O22899|PRP43_ARATH	sp|Q9LZQ9|DEAH2_ARATH;sp|O22899|PRP43_ARATH	Color [DarkGray]	1	4				+	0.0030303	0.89616	110930000	3	2.83927	0.169017	0.156604	0.229719	0.180447	0.019316	0.0238177	0.0165838
+	2.33924	1.26815	sp|O23813|SIR_MAIZE	sp|O23813|SIR_MAIZE	Color [DarkGray]	1	4					0	126	3041600000	44	1.26815	2.33924	5.599	2.97099	3.09588	1.80113	1.46331	1.38373
	-0.0849281	0.167474	sp|O23888|ALDO2_MAIZE	sp|O23888|ALDO2_MAIZE	Color [DarkGray]	1	4					0	18.153	372410000	10	0.167474	-0.0849281	0	0.558086	0.015467	0.168048	0.330598	0.329691
+	3.59391	2.17422	sp|O24413|RLA3_MAIZE	sp|O24413|RLA3_MAIZE	Color [DarkGray]	1	4				+	0	154.31	5635900000	19	2.17422	3.59391	7.79758	6.34865	5.54491	2.54203	3.0635	3.30388
+	-0.586044	2.46831	sp|O24415|RLA2B_MAIZE	sp|O24415|RLA2B_MAIZE	Color [DarkGray]	1	4				+	0	85.419	684770000	8	2.46831	-0.586044	0.260823	0	0.123058	0.61099	0.806129	0.724894
+	-0.562604	1.01022	sp|O24562|CADH_MAIZE	sp|O24562|CADH_MAIZE	Color [DarkGray]	1	4					0	291.69	5036100000	60	1.01022	-0.562604	3.02107	3.44251	3.44156	4.08327	3.42338	4.0863
+	21.9475	3.83105	sp|O24573|RLA0_MAIZE	sp|O24573|RLA0_MAIZE	Color [DarkGray]	1	4				+	0	129.02	20509000000	56	3.83105	21.9475	28.0576	28.8064	31.421	5.12394	8.61521	8.70348
+	4.62933	2.06278	sp|O24578|PURA_MAIZE	sp|O24578|PURA_MAIZE	Color [DarkGray]	1	4				+	0	124.18	4162900000	59	2.06278	4.62933	8.1273	5.15916	5.41647	1.92039	1.334	1.56054
+	6.25366	1.74746	sp|O48556|IPYR_MAIZE	sp|O48556|IPYR_MAIZE	Color [DarkGray]	1	4				+	0	75.261	6360200000	49	1.74746	6.25366	5.62348	11.184	8.71816	2.03649	2.44732	2.2809
+	10.6991	2.41669	sp|O48557|RL17_MAIZE	sp|O48557|RL17_MAIZE	Color [DarkGray]	1	4				+	0	147.43	11350000000	67	2.41669	10.6991	15.0554	12.6964	18.6109	3.96295	5.51808	4.78426
+	2.92747	2.05874	sp|O48558|RL30_MAIZE	sp|O48558|RL30_MAIZE	Color [DarkGray]	1	4				+	0	54.878	2722300000	27	2.05874	2.92747	2.63206	4.46446	4.40236	0.676622	1.03992	0.99993
+	-0.00360441	0.908871	sp|O48950|TATB_MAIZE	sp|O48950|TATB_MAIZE	Color [DarkGray]	1	4					0	1.3171	3233100	2	0.908871	-0.00360441	0	0	0	0	0.00613815	0.00467508
+	-0.679092	1.62329	sp|O64411|PAO_MAIZE	sp|O64411|PAO_MAIZE	Color [DarkGray]	1	4				+	0	77.416	1229500000	22	1.62329	-0.679092	0.453254	0.28703	0.639898	1.46226	0.959072	0.996128
+	2.2973	1.77106	sp|O64964|TIP11_MAIZE	sp|O64964|TIP11_MAIZE	Color [DarkGray]	1	4				+	0	48.694	3820200000	10	1.77106	2.2973	3.14789	4.92235	4.61666	1.59708	1.91091	2.287
	-0.135052	0.870459	sp|O65101|PSAH_MAIZE	sp|O65101|PSAH_MAIZE	Color [DarkGray]	1	4					0	113.93	121760000	6	0.870459	-0.135052	0	0	0	0.277835	0.0449846	0.0823363
+	-0.684	4.03483	sp|O65107|PSAN_MAIZE	sp|O65107|PSAN_MAIZE	Color [DarkGray]	1	4				+	0	9.6797	613390000	7	4.03483	-0.684	0	0	0	0.605419	0.692525	0.754055
	0.0285712	0.63217	sp|O81220|DCUP_MAIZE	sp|O81220|DCUP_MAIZE	Color [DarkGray]	1	4					0	3.7332	58335000	3	0.63217	0.0285712	0.103844	0.0489412	0.0395104	0.0424875	0.0312333	0.0328613
+	0.712521	1.41729	sp|O81395|DRTS_MAIZE	sp|O81395|DRTS_MAIZE	Color [DarkGray]	1	4				+	0	7.0218	426520000	8	1.41729	0.712521	1.2574	0.688283	0.47894	0.143872	0.0526642	0.0905229
+	0.578236	2.0061	sp|O81482|IF4E2_MAIZE	sp|O81482|IF4E2_MAIZE	Color [DarkGray]	1	4				+	0	36.423	659330000	20	2.0061	0.578236	0.603665	0.93752	1	0.313904	0.24887	0.243702
+	0.670426	1.49448	sp|O82106|ZM33_MAIZE	sp|O82106|ZM33_MAIZE	Color [DarkGray]	1	4				+	0	4.3121	301370000	3	1.49448	0.670426	1.10083	0.518375	0.448286	0.0562104	0	0
	0.733463	0.353122	sp|P00056|CYC_MAIZE	sp|P00056|CYC_MAIZE	Color [DarkGray]	1	4					0	11.118	344080000	4	0.353122	0.733463	2.56464	0	0	0.364254	0	0
+	6.68637	2.45761	sp|P00333|ADH1_MAIZE	sp|P00333|ADH1_MAIZE	Color [DarkGray]	1	4				+	0	201.36	11237000000	68	2.45761	6.68637	11.0555	12.3649	14.2579	6.97818	5.24664	5.39433
+	1.66041	1.07747	sp|P00412|COX2_MAIZE	sp|P00412|COX2_MAIZE	Color [DarkGray]	1	4					0	29.456	3026100000	23	1.07747	1.66041	4.8123	2.68664	2.72416	2.09988	1.53923	1.60278
+	-19.8303	2.53433	sp|P00827|ATPB_MAIZE	sp|P00827|ATPB_MAIZE	Color [DarkGray]	1	4				+	0	323.31	32699000000	162	2.53433	-19.8303	16.9735	9.85109	6.90265	29.7663	31.7493	31.7025
+	-0.143559	3.99453	sp|P00835|ATPE_MAIZE	sp|P00835|ATPE_MAIZE	Color [DarkGray]	1	4				+	0	44.588	129080000	2	3.99453	-0.143559	0	0	0	0.162088	0.134146	0.134441
+	-61.1583	4.64701	sp|P00874|RBL_MAIZE	sp|P00874|RBL_MAIZE	Color [DarkGray]	1	4				+	0	323.31	59022000000	188	4.64701	-61.1583	2.34538	4.3691	2.18047	61.8473	61.1967	69.3258
	0.024699	0.043494	sp|P02355|RR4_MAIZE	sp|P02355|RR4_MAIZE	Color [DarkGray]	1	4					0	1.1132	202750000	4	0.043494	0.024699	0.57548	0	0	0.220876	0.134464	0.146043
+	9.3018	2.17602	sp|P02582|ACT1_MAIZE	sp|P02582|ACT1_MAIZE	Color [DarkGray]	1	4				+	0	244.79	21494000000	87	2.17602	9.3018	22.2746	24.2037	18.8414	14.0552	10.9972	12.3618
+	-0.40355	1.97526	sp|P04707|ADH2_MAIZE	sp|P04707|ADH2_MAIZE	Color [DarkGray]	1	4				+	0	7.6095	696690000	15	1.97526	-0.40355	0.353437	0.197627	0.201219	0.790875	0.629869	0.542188
+	17.9842	3.4663	sp|P04709|ADT1_MAIZE	sp|P04709|ADT1_MAIZE	Color [DarkGray]	1	4				+	0	50.306	28183000000	84	3.4663	17.9842	34.013	32.0853	31.5557	17.3296	12.8458	13.5261
+	-25.2829	4.59408	sp|P04711|CAPP1_MAIZE	sp|P04711|CAPP1_MAIZE	Color [DarkGray]	1	4				+	0	323.31	25841000000	205	4.59408	-25.2829	1.9892	2.57106	2.3031	25.6863	27.4039	29.6219
+	11.0641	2.40042	sp|P04712|SUS1_MAIZE	sp|P04712|SUS1_MAIZE	Color [DarkGray]	1	4				+	0	274.98	22349000000	150	2.40042	11.0641	27.2725	21.8248	22.6007	14.2708	11.7915	12.4434
+	-1.98568	3.79729	sp|P04713|SSG1_MAIZE	sp|P04713|SSG1_MAIZE	Color [DarkGray]	1	4				+	0	70.442	2267500000	35	3.79729	-1.98568	0.376736	0.366173	0.327533	2.06688	2.41391	2.54669
+	8.439	3.40092	sp|P04907|GSTF3_MAIZE	sp|P04907|GSTF3_MAIZE	Color [DarkGray]	1	4				+	0	68.656	9688900000	49	3.40092	8.439	13.6632	11.2765	13.3399	3.94119	4.46279	4.55858
+	-1.03238	2.16002	sp|P04966|PSAA_MAIZE	sp|P04966|PSAA_MAIZE	Color [DarkGray]	1	4				+	0	4.2339	996140000	9	2.16002	-1.03238	0.0363714	0.0674621	0.0353463	1.4787	0.923464	0.834141
+	-2.04758	3.77328	sp|P04967|PSAB_MAIZE	sp|P04967|PSAB_MAIZE	Color [DarkGray]	1	4				+	0	40.272	2015200000	30	3.77328	-2.04758	0.204508	0.107837	0.0887137	2.44858	1.94555	2.14967
+	-18.5562	3.4031	sp|P05022|ATPA_MAIZE	sp|P05022|ATPA_MAIZE	Color [DarkGray]	1	4				+	0	215.62	22515000000	109	3.4031	-18.5562	7.62882	2.96284	2.88254	24.3064	22.6291	22.2073
+	-9.95907	4.72063	sp|P05348|RBS_MAIZE	sp|P05348|RBS_MAIZE	Color [DarkGray]	1	4				+	0	100.89	9558200000	48	4.72063	-9.95907	0.449433	0.41715	0.466556	11.2434	10.0405	9.9264
+	35.2171	1.82186	sp|P05494|ATPAM_MAIZE	sp|P05494|ATPAM_MAIZE	Color [DarkGray]	1	4				+	0	144.58	53377000000	181	1.82186	35.2171	79.2077	57.9535	52.699	22.1535	30.9158	31.1396
+	-3.55553	2.38664	sp|P05641|PSBB_MAIZE	sp|P05641|PSBB_MAIZE	Color [DarkGray]	1	4				+	0	61.35	3897600000	29	2.38664	-3.55553	0.455076	0.563596	0.478615	5.17603	3.86768	3.12017
+	-0.743415	1.30598	sp|P05642|CYB6_MAIZE	sp|P05642|CYB6_MAIZE	Color [DarkGray]	1	4				+	0	10.351	669730000	6	1.30598	-0.743415	0	0	0	1.27265	0.421339	0.536259
+	-0.0284122	2.9922	sp|P05643|PETD_MAIZE	sp|P05643|PETD_MAIZE	Color [DarkGray]	1	4				+	0	1.8085	25494000	5	2.9922	-0.0284122	0	0	0	0.0340585	0.0225786	0.0285995
+	-1.87878	2.85496	sp|P06671|CB22_MAIZE;sp|Q00827|CB48_MAIZE	sp|P06671|CB22_MAIZE	Color [DarkGray]	1	4				+	0	30.254	1935700000	13	2.85496	-1.87878	0	0.258728	0.261921	1.65243	2.08604	2.41854
+	66.0797	3.23723	sp|P08440|ALF_MAIZE	sp|P08440|ALF_MAIZE	Color [DarkGray]	1	4				+	0	323.31	115490000000	312	3.23723	66.0797	119.481	140.307	121.411	60.1398	61.1124	61.7078
	0.00197792	0.020612	sp|P08528|RK16_MAIZE	sp|P08528|RK16_MAIZE	Color [DarkGray]	1	4					0.0030211	0.8855	26101000	0	0.020612	0.00197792	0.0707379	0	0	0.0648042	0	0
+	-0.0715438	0.960137	sp|P08529|RK14_MAIZE	sp|P08529|RK14_MAIZE	Color [DarkGray]	1	4					0	2.2602	92261000	3	0.960137	-0.0715438	0.0711607	0	0	0.146137	0.0650592	0.0745963
	0.0173424	0.0784961	sp|P08530|RR8_MAIZE	sp|P08530|RR8_MAIZE	Color [DarkGray]	1	4					0.0086455	0.62711	158320000	2	0.0784961	0.0173424	0	0.175932	0.176655	0.133014	0.167547	0
+	35.0519	4.35242	sp|P08735|G3PC1_MAIZE	sp|P08735|G3PC1_MAIZE	Color [DarkGray]	1	4				+	0	308.64	35318000000	74	4.35242	35.0519	49.2111	46.4229	51.548	11.8526	14.8627	15.311
	0.0313898	0.2132	sp|P09004|MI25_MAIZE	sp|P09004|MI25_MAIZE	Color [DarkGray]	1	4					0	60.296	584420000	15	0.2132	0.0313898	0.559856	0.384412	0.425356	0.466871	0.412616	0.395968
+	2.22963	1.68566	sp|P09233|SODM1_MAIZE;sp|P41979|SODM3_MAIZE	sp|P09233|SODM1_MAIZE;sp|P41979|SODM3_MAIZE	Color [DarkGray]	1	4				+	0	323.31	3641900000	51	1.68566	2.22963	2.91006	4.86361	4.3587	1.58917	1.80023	2.0541
+	-11.9501	3.09562	sp|P09315|G3PA_MAIZE	sp|P09315|G3PA_MAIZE	Color [DarkGray]	1	4				+	0	323.31	13235000000	77	3.09562	-11.9501	2.61976	1.32479	1.68643	16.3219	12.7738	12.3855
+	-1.81647	2.36848	sp|P0C1M0|ATPG_MAIZE	sp|P0C1M0|ATPG_MAIZE	Color [DarkGray]	1	4				+	0	49.816	1637600000	23	2.36848	-1.81647	0.0430416	0	0	1.42257	1.62945	2.44044
+	-4.42937	3.10972	sp|P0C1Y5|EXB11_MAIZE	sp|P0C1Y5|EXB11_MAIZE	Color [DarkGray]	1	4				+	0	123.53	4018700000	39	3.10972	-4.42937	0	0.0351806	0.0732653	3.58221	4.57629	5.23806
+	-0.123271	1.51327	sp|P10581|RPOP_MAIZE	sp|P10581|RPOP_MAIZE	Color [DarkGray]	1	4				+	0	4.4584	151150000	6	1.51327	-0.123271	0	0.0773578	0	0.101823	0.196854	0.148495
	-0.0434984	0.427243	sp|P10582|DPOM_MAIZE	sp|P10582|DPOM_MAIZE	Color [DarkGray]	1	4					0	2.678	39587000	2	0.427243	-0.0434984	0	0	0	0.130495	0	0
+	2.14877	2.18706	sp|P10979|GRPA_MAIZE	sp|P10979|GRPA_MAIZE	Color [DarkGray]	1	4				+	0	32.657	2024200000	23	2.18706	2.14877	2.33176	3.62102	2.5527	0.898108	0.529852	0.631204
+	62.1489	6.05117	sp|P11143|HSP70_MAIZE	sp|P11143|HSP70_MAIZE	Color [DarkGray]	1	4				+	0	323.31	64284000000	234	6.05117	62.1489	87.8883	89.3165	86.4794	23.9372	26.6337	26.6664
+	-27.3302	4.40395	sp|P11155|PPDK1_MAIZE	sp|P11155|PPDK1_MAIZE	Color [DarkGray]	1	4				+	0	323.31	25318000000	135	4.40395	-27.3302	0.56965	0.435275	0.647431	30.6481	26.7002	26.2946
	0.188116	0.220148	sp|P11428|SODC2_MAIZE	sp|P11428|SODC2_MAIZE	Color [DarkGray]	1	4					0	3.3123	582850000	4	0.220148	0.188116	0.847316	0.816476	0	0	0.516621	0.582825
+	-1.04437	3.72396	sp|P11601|PSAC_MAIZE	sp|P11601|PSAC_MAIZE	Color [DarkGray]	1	4				+	0	21.62	1131500000	9	3.72396	-1.04437	0	0.190951	0.206122	1.09655	1.24303	1.19059
+	-6.7284	2.38831	sp|P12329|CB21_MAIZE	sp|P12329|CB21_MAIZE	Color [DarkGray]	1	4				+	0	26.126	6535200000	36	2.38831	-6.7284	0.693336	0.236682	0.191478	9.34599	5.8119	6.1488
	4.68728	0.751481	sp|P12653|GSTF1_MAIZE	sp|P12653|GSTF1_MAIZE	Color [DarkGray]	1	4					0	179.15	13641000000	73	0.751481	4.68728	18.7599	11.6781	9.84232	9.57905	6.93076	9.70875
	-0.0271261	0.199452	sp|P12857|ADT2_MAIZE	sp|P12857|ADT2_MAIZE	Color [DarkGray]	1	4					0	1.2244	118880000	7	0.199452	-0.0271261	0	0.0988023	0.0936291	0.173968	0.0517302	0.0481112
+	29.803	2.34134	sp|P12863|TPIS_MAIZE	sp|P12863|TPIS_MAIZE	Color [DarkGray]	1	4				+	0	323.31	31203000000	136	2.34134	29.803	43.8442	33.6104	51.3776	12.5013	12.4761	14.4459
+	4.33786	1.90465	sp|P13689|ABP1_MAIZE	sp|P13689|ABP1_MAIZE	Color [DarkGray]	1	4				+	0	190.85	3023300000	27	1.90465	4.33786	7.18809	3.98934	4.48592	1.04249	0.594908	1.01238
+	115.973	5.96878	sp|P14641|TBA2_MAIZE;sp|P14640|TBA1_MAIZE	sp|P14641|TBA2_MAIZE;sp|P14640|TBA1_MAIZE	Color [DarkGray]	1	4				+	0	323.31	120560000000	301	5.96878	115.973	162.017	163.195	168.382	46.0344	48.8957	50.7447
+	0.0380446	1.79611	sp|P15718|POLB_MAIZE	sp|P15718|POLB_MAIZE	Color [DarkGray]	1	4				+	0	1.0295	16412000	0	1.79611	0.0380446	0.055833	0.0348659	0.023435	0	0	0
+	-3.90074	3.68367	sp|P15719|MDHP_MAIZE	sp|P15719|MDHP_MAIZE	Color [DarkGray]	1	4				+	0	238.99	4859900000	48	3.68367	-3.90074	1.57888	0.631996	0.893904	5.12164	4.9353	4.75008
	-0.00962135	0.427243	sp|P16024|RPOC1_MAIZE	sp|P16024|RPOC1_MAIZE	Color [DarkGray]	1	4					0.0058824	0.71358	8756200	1	0.427243	-0.00962135	0	0	0	0.0288641	0	0
+	0.159468	1.91197	sp|P16166|UFOG1_MAIZE;sp|P16165|UFOG2_MAIZE;sp|P16167|UFOG3_MAIZE	sp|P16166|UFOG1_MAIZE;sp|P16165|UFOG2_MAIZE;sp|P16167|UFOG3_MAIZE	Color [DarkGray]	1	4				+	0	5.308	206760000	4	1.91197	0.159468	0.180111	0.295505	0.276566	0.078926	0.107692	0.0871603
+	-3.12829	2.97817	sp|P16243|MAOC_MAIZE	sp|P16243|MAOC_MAIZE	Color [DarkGray]	1	4				+	0	220.02	4442200000	47	2.97817	-3.12829	0.85711	1.53559	1.10137	4.83683	3.76293	4.27919
	-0.106353	0.445009	sp|P17788|RK2_MAIZE	sp|P17788|RK2_MAIZE	Color [DarkGray]	1	4					0	61.478	213490000	6	0.445009	-0.106353	0.247571	0.041598	0	0.327373	0.0912372	0.189616
+	4.71473	4.16717	sp|P18025|TBB1_MAIZE	sp|P18025|TBB1_MAIZE	Color [DarkGray]	1	4				+	0	83.298	5016700000	33	4.16717	4.71473	7.08631	6.29355	7.0482	2.06184	2.27355	1.94848
	0.240814	0.494809	sp|P18026|TBB2_MAIZE	sp|P18026|TBB2_MAIZE	Color [DarkGray]	1	4					0	12.575	649420000	12	0.494809	0.240814	0.210316	0.929368	0.659496	0.305973	0.419621	0.351146
+	8.9066	2.75239	sp|P18122|CATA1_MAIZE	sp|P18122|CATA1_MAIZE	Color [DarkGray]	1	4				+	0	323.31	12050000000	102	2.75239	8.9066	17.1745	14.0785	13.2442	5.95926	5.70002	6.11811
+	-12.8159	3.79441	sp|P18123|CATA3_MAIZE	sp|P18123|CATA3_MAIZE	Color [DarkGray]	1	4				+	0	320.31	17347000000	132	3.79441	-12.8159	3.1615	4.90915	4.45094	16.2276	18.527	16.2147
+	70.732	3.37372	sp|P19023|ATPBM_MAIZE	sp|P19023|ATPBM_MAIZE	Color [DarkGray]	1	4				+	0	323.31	92322000000	257	3.37372	70.732	126.442	104.44	114.753	42.8567	42.7469	47.8356
+	-0.360396	5.58713	sp|P19124|NDHJ_MAIZE	sp|P19124|NDHJ_MAIZE	Color [DarkGray]	1	4				+	0	14.129	324050000	7	5.58713	-0.360396	0	0	0	0.376582	0.360045	0.34456
	0.153104	0.372385	sp|P19656|NLTP_MAIZE	sp|P19656|NLTP_MAIZE	Color [DarkGray]	1	4					0	136.13	2578200000	28	0.372385	0.153104	1.70779	2.09149	2.11235	1.60146	1.97136	1.87949
+	-0.078578	2.34492	sp|P19862|PHYA1_MAIZE	sp|P19862|PHYA1_MAIZE	Color [DarkGray]	1	4				+	0	5.7393	75818000	5	2.34492	-0.078578	0.0143406	0	0	0.0937961	0.057918	0.0983606
+	10.1483	2.42015	sp|P19950|RS141_MAIZE	sp|P19950|RS141_MAIZE	Color [DarkGray]	1	4				+	0	145.89	10952000000	85	2.42015	10.1483	15.8437	11.6267	17.2084	4.75343	4.61391	4.86658
+	0.0310163	2.31069	sp|P19951|RS142_MAIZE	sp|P19951|RS142_MAIZE	Color [DarkGray]	1	4				+	0	2.8443	76695000	0	2.31069	0.0310163	0.0794525	0.0839337	0.0657006	0.0443928	0.0459964	0.0456486
+	40.9511	2.16647	sp|P21569|CYPH_MAIZE	sp|P21569|CYPH_MAIZE	Color [DarkGray]	1	4				+	0	121.36	41264000000	119	2.16647	40.9511	42.5618	57.8214	68.9499	10.9771	17.6368	17.866
	0.136352	0.702088	sp|P21641|OLEO3_MAIZE	sp|P21641|OLEO3_MAIZE	Color [DarkGray]	1	4					0.0086207	0.59597	126140000	3	0.702088	0.136352	0	0.290327	0.215448	0	0.0419394	0.0547804
+	0.140306	1.90631	sp|P22198|PP1_MAIZE	sp|P22198|PP1_MAIZE	Color [DarkGray]	1	4				+	0.0030488	0.89866	199620000	2	1.90631	0.140306	0.190597	0.256332	0.260236	0.0507911	0.106149	0.129307
+	15.5544	4.1307	sp|P22275|TBA3_MAIZE	sp|P22275|TBA3_MAIZE	Color [DarkGray]	1	4				+	0	219.87	15593000000	65	4.1307	15.5544	23.2056	20.2582	21.9125	5.51358	6.54192	6.65771
+	0.417193	3.91379	sp|P23111|CDC2_MAIZE	sp|P23111|CDC2_MAIZE	Color [DarkGray]	1	4				+	0.008596	0.57179	266240000	4	3.91379	0.417193	0.428945	0.483856	0.487686	0.00895603	0.0782682	0.0616833
+	0.534962	1.30267	sp|P23225|GLTB_MAIZE	sp|P23225|GLTB_MAIZE	Color [DarkGray]	1	4				+	0	96.659	1832500000	44	1.30267	0.534962	1.79068	1.93055	1.34229	1.28329	1.02539	1.14995
+	4.75948	2.60178	sp|P23345|SODC4_MAIZE;sp|P23346|SODC5_MAIZE	sp|P23345|SODC4_MAIZE;sp|P23346|SODC5_MAIZE	Color [DarkGray]	1	4				+	0	172.8	5731000000	30	2.60178	4.75948	6.03775	7.79179	7.93297	2.26193	2.03399	3.18815
+	4.89516	0.95301	sp|P23444|H1_MAIZE	sp|P23444|H1_MAIZE	Color [DarkGray]	1	4					0	5.5428	2860500000	15	0.95301	4.89516	10.3624	3.65067	2.87928	1.46259	0.321609	0.422721
+	41.8072	1.3549	sp|P24067|BIP2_MAIZE	sp|P24067|BIP2_MAIZE	Color [DarkGray]	1	4				+	0	323.31	58025000000	237	1.3549	41.8072	90.1633	78.8879	42.5873	26.0664	30.815	29.3355
+	0.661129	1.13798	sp|P24631|HSP21_MAIZE	sp|P24631|HSP21_MAIZE	Color [DarkGray]	1	4					0	17.964	507170000	12	1.13798	0.661129	1.37675	0.515142	0.653814	0.188014	0.087605	0.286696
+	-1.09387	3.13822	sp|P24993|PSBH_MAIZE	sp|P24993|PSBH_MAIZE	Color [DarkGray]	1	4				+	0	47.822	1352200000	9	3.13822	-1.09387	0.0352317	0.391789	0.337095	1.32522	1.29907	1.42143
+	31.4246	3.31554	sp|P25460|RS11_MAIZE	sp|P25460|RS11_MAIZE	Color [DarkGray]	1	4				+	0	102.53	28739000000	117	3.31554	31.4246	35.5743	43.2201	45.2921	10.6909	8.67131	10.4503
	0.193728	0.534595	sp|P25462|GLNAC_MAIZE	sp|P25462|GLNAC_MAIZE	Color [DarkGray]	1	4					0	35.586	447030000	8	0.534595	0.193728	0.781064	0.255048	0.40383	0.223095	0.309891	0.325773
	0.603735	0.298606	sp|P25709|NDHH_MAIZE	sp|P25709|NDHH_MAIZE	Color [DarkGray]	1	4					0	3.1805	416530000	2	0.298606	0.603735	2.45452	0	0	0.34319	0.130342	0.169779
+	-8.71348	4.11763	sp|P26216|PGLR1_MAIZE	sp|P26216|PGLR1_MAIZE	Color [DarkGray]	1	4				+	0	70.71	7860200000	60	4.11763	-8.71348	0.0572625	0	0.0222087	9.73134	7.9546	8.53396
	0.165764	0.626715	sp|P26259|DAPA_MAIZE	sp|P26259|DAPA_MAIZE	Color [DarkGray]	1	4					0	23.217	186400000	4	0.626715	0.165764	0.49019	0.143659	0.152723	0.154341	0.0359721	0.098964
+	51.7852	3.6051	sp|P26301|ENO1_MAIZE	sp|P26301|ENO1_MAIZE	Color [DarkGray]	1	4				+	0	323.31	63965000000	279	3.6051	51.7852	79.615	74.7894	88.9371	28.3732	30.4936	29.1193
+	22.8652	3.10682	sp|P27347|MNB1B_MAIZE	sp|P27347|MNB1B_MAIZE	Color [DarkGray]	1	4				+	0	182.62	21264000000	83	3.10682	22.8652	26.1252	34.6382	29.8736	8.01919	6.74882	7.27336
+	-1.44017	4.71267	sp|P27497|CB29_MAIZE	sp|P27497|CB29_MAIZE	Color [DarkGray]	1	4				+	0	47.556	1446500000	14	4.71267	-1.44017	0.192881	0.0742338	0.0879796	1.47307	1.56176	1.64076
+	-0.0220703	0.882266	sp|P27787|FER1_MAIZE	sp|P27787|FER1_MAIZE	Color [DarkGray]	1	4					0	1.2206	19840000	1	0.882266	-0.0220703	0	0	0	0	0.0395881	0.0266228
	0.105392	0.502442	sp|P27788|FER3_MAIZE	sp|P27788|FER3_MAIZE	Color [DarkGray]	1	4					0	97.975	520420000	13	0.502442	0.105392	0.585274	0.31434	0.491561	0.422732	0.269729	0.382539
+	20.2812	3.93419	sp|P27923|RS27A_MAIZE	sp|P27923|RS27A_MAIZE	Color [DarkGray]	1	4				+	0	81.911	22294000000	129	3.93419	20.2812	31.6216	28.0108	29.9355	8.20115	9.34749	11.1758
+	2.62969	1.65916	sp|P28516|PDC1_MAIZE;sp|Q05326|PDC2_MAIZE	sp|P28516|PDC1_MAIZE;sp|Q05326|PDC2_MAIZE	Color [DarkGray]	1	4				+	0	83.466	2435200000	34	1.65916	2.62969	4.61071	3.56906	2.49952	1.70418	0.539647	0.546409
+	0.730262	3.32782	sp|P28523|CSK2A_MAIZE	sp|P28523|CSK2A_MAIZE	Color [DarkGray]	1	4				+	0	5.4932	446470000	5	3.32782	0.730262	0.88759	0.696662	0.86639	0.123971	0.0170268	0.118857
+	-7.41487	7.74864	sp|P29022|CHIA_MAIZE;sp|P29023|CHIB_MAIZE	sp|P29022|CHIA_MAIZE	Color [DarkGray]	1	4				+	0	323.31	6662000000	35	7.74864	-7.41487	0	0	0	7.52406	7.35301	7.36754
+	3.74022	1.54004	sp|P29036|FRI1_MAIZE	sp|P29036|FRI1_MAIZE	Color [DarkGray]	1	4				+	0	156.43	5814900000	50	1.54004	3.74022	5.24699	8.77317	5.64718	2.65998	2.76546	3.02124
+	1.39331	0.989863	sp|P29038|LDH_MAIZE	sp|P29038|LDH_MAIZE	Color [DarkGray]	1	4					0	18.217	3398500000	31	0.989863	1.39331	2.22252	4.01653	3.75155	1.79994	1.40963	2.6011
+	40.0364	5.09181	sp|P29185|CH61_MAIZE	sp|P29185|CH61_MAIZE	Color [DarkGray]	1	4				+	0	323.31	33089000000	186	5.09181	40.0364	47.6893	52.1062	51.2582	10.539	10.4771	9.92849
	-0.0163725	0.0667265	sp|P29306|1433X_MAIZE	sp|P29306|1433X_MAIZE	Color [DarkGray]	1	4					0	48.139	789010000	7	0.0667265	-0.0163725	0.516475	0.571064	0.607807	0.418875	0.658213	0.667376
+	0.174796	1.07638	sp|P29390|FRI2_MAIZE	sp|P29390|FRI2_MAIZE	Color [DarkGray]	1	4					0	22.712	249770000	5	1.07638	0.174796	0.153266	0.416285	0.287577	0.101853	0.104378	0.126509
+	153.291	2.26629	sp|P30756|H2B2_MAIZE;sp|P49120|H2B4_MAIZE;sp|P30755|H2B1_MAIZE;sp|P54348|H2B5_MAIZE;sp|Q43261|H2B3_MAIZE	sp|P30756|H2B2_MAIZE;sp|P49120|H2B4_MAIZE;sp|P30755|H2B1_MAIZE;sp|P54348|H2B5_MAIZE;sp|Q43261|H2B3_MAIZE	Color [DarkGray]	1	4				+	0	82.012	115640000000	50	2.26629	153.291	243.344	148.755	177.951	36.221	34.6165	39.3387
+	32.5581	3.26241	sp|P30792|PMGI_MAIZE	sp|P30792|PMGI_MAIZE	Color [DarkGray]	1	4				+	0	323.31	35037000000	167	3.26241	32.5581	54.0005	44.0271	44.6135	14.9014	14.8996	15.1655
+	-0.411446	2.49128	sp|P31726|CYT1_MAIZE	sp|P31726|CYT1_MAIZE	Color [DarkGray]	1	4				+	0	12.011	441180000	10	2.49128	-0.411446	0.0664482	0.0834555	0	0.463772	0.564196	0.356273
	-0.0124793	0.108465	sp|P31927|SPSA_MAIZE	sp|P31927|SPSA_MAIZE	Color [DarkGray]	1	4					0.0058309	0.68157	82698000	3	0.108465	-0.0124793	0.131526	0.0139779	0.0279706	0.107473	0.0466256	0.056814
+	1.19234	1.0841	sp|Q02245|TBA5_MAIZE;sp|P33627|TBA6_MAIZE	sp|Q02245|TBA5_MAIZE;sp|P33627|TBA6_MAIZE	Color [DarkGray]	1	4					0	123.58	2729000000	29	1.0841	1.19234	3.41722	3.14427	1.83786	1.29964	1.62569	1.897
+	-0.250914	1.33705	sp|P33679|ZEAM_MAIZE	sp|P33679|ZEAM_MAIZE	Color [DarkGray]	1	4				+	0	29.401	223160000	10	1.33705	-0.250914	0	0	0	0.090035	0.270436	0.39227
+	-1.96717	3.68644	sp|P35081|PROF1_MAIZE	sp|P35081|PROF1_MAIZE	Color [DarkGray]	1	4				+	0	91.534	1780600000	14	3.68644	-1.96717	0	0.0283925	0	1.67362	2.14302	2.11326
+	-7.20213	3.15165	sp|P35082|PROF2_MAIZE;sp|A4KA57|PROF8_MAIZE	sp|P35082|PROF2_MAIZE;sp|A4KA57|PROF8_MAIZE	Color [DarkGray]	1	4				+	0	190.51	6518300000	32	3.15165	-7.20213	0	0	0.0749122	8.73055	6.70569	6.24507
+	-0.268537	3.34774	sp|P35083|PROF3_MAIZE;sp|A4KA55|PROF6_MAIZE	sp|P35083|PROF3_MAIZE;sp|A4KA55|PROF6_MAIZE	Color [DarkGray]	1	4				+	0	1.3277	240280000	2	3.34774	-0.268537	0	0	0	0.264817	0.226619	0.314176
	-0.0157173	0.427243	sp|P35338|PGLR2_MAIZE	sp|P35338|PGLR2_MAIZE	Color [DarkGray]	1	4					0	4.1252	14304000	1	0.427243	-0.0157173	0	0	0	0.0471519	0	0
+	-0.128427	4.38171	sp|P35339|PGLR3_MAIZE	sp|P35339|PGLR3_MAIZE	Color [DarkGray]	1	4				+	0	1.8684	115290000	2	4.38171	-0.128427	0	0	0	0.115206	0.134555	0.135519
+	-0.163866	3.34253	sp|P38559|GLNA1_MAIZE	sp|P38559|GLNA1_MAIZE	Color [DarkGray]	1	4				+	0	35.978	146690000	4	3.34253	-0.163866	0	0	0	0.17024	0.134383	0.186975
+	0.485323	1.51946	sp|P38560|GLNA2_MAIZE	sp|P38560|GLNA2_MAIZE	Color [DarkGray]	1	4				+	0	20.453	784580000	16	1.51946	0.485323	0.71075	1	0.923013	0.614913	0.357613	0.205267
+	0.757686	1.26996	sp|P38561|GLNA3_MAIZE	sp|P38561|GLNA3_MAIZE	Color [DarkGray]	1	4					0	2.7736	2613400000	19	1.26996	0.757686	1.90081	2.86643	2.33125	1.59339	1.64521	1.58684
	-0.358222	0.0799309	sp|P38562|GLNA4_MAIZE	sp|P38562|GLNA4_MAIZE	Color [DarkGray]	1	4					0	323.31	11128000000	97	0.0799309	-0.358222	6.97926	6.58955	10.2343	6.14485	9.55959	9.17332
+	-0.124481	1.52696	sp|P38563|GLNA5_MAIZE	sp|P38563|GLNA5_MAIZE	Color [DarkGray]	1	4				+	0	2.8882	112900000	6	1.52696	-0.124481	0	0	0	0.19022	0.123357	0.0598661
+	114.236	3.01448	sp|P40280|H2A_MAIZE	sp|P40280|H2A_MAIZE	Color [DarkGray]	1	4				+	0	35.08	92791000000	42	3.01448	114.236	124.894	134.956	168.043	25.4358	28.217	31.5323
+	5.04802	2.00533	sp|P41040|CALM_MAIZE	sp|P41040|CALM_MAIZE	Color [DarkGray]	1	4				+	0	323.31	16335000000	64	2.00533	5.04802	16.8253	13.8818	15.5921	9.15711	10.4842	11.5138
	0.854057	0.29498	sp|P41376|IF4A1_ARATH	sp|P41376|IF4A1_ARATH	Color [DarkGray]	1	4	+				1	-2	600900000	2	0.29498	0.854057	3.4249	0.0521199	0	0.914854	0	0
	0	0	sp|P41377|IF4A2_ARATH	sp|P41377|IF4A2_ARATH	Color [DarkGray]	1	4					0	1.6852	0	1	0	0	0	0	0	0	0	0
+	1.38844	2.52666	sp|P41980|SODM4_MAIZE;sp|P41978|SODM2_MAIZE	sp|P41980|SODM4_MAIZE;sp|P41978|SODM2_MAIZE	Color [DarkGray]	1	4				+	0	49.028	1226800000	15	2.52666	1.38844	1.35182	1.99085	2.00243	0.391581	0.374509	0.413687
+	0.411371	1.12483	sp|P42057|VDAC_MAIZE	sp|P42057|VDAC_MAIZE	Color [DarkGray]	1	4					0	26.921	521620000	6	1.12483	0.411371	0.295256	0.747211	0.851005	0.176767	0.247488	0.235104
+	2.25991	3.86759	sp|P42856|ZB14_MAIZE	sp|P42856|ZB14_MAIZE	Color [DarkGray]	1	4				+	0	6.1193	1910300000	14	3.86759	2.25991	3.09979	2.98657	2.58883	0.632944	0.586476	0.676026
+	30.6996	2.63866	sp|P42895|ENO2_MAIZE	sp|P42895|ENO2_MAIZE	Color [DarkGray]	1	4				+	0	323.31	31754000000	164	2.63866	30.6996	42.7078	50.8265	35.6872	10.862	13.3715	12.8892
+	-0.53674	1.3624	sp|P43188|KADC_MAIZE	sp|P43188|KADC_MAIZE	Color [DarkGray]	1	4				+	0	5.6658	1164700000	18	1.3624	-0.53674	0.189993	0.677991	0.564156	0.794205	1.13741	1.11075
	0.0141527	0.0957372	sp|P43283|TRPB1_MAIZE;sp|Q59992|TRPB_SYNY3	sp|P43283|TRPB1_MAIZE	Color [DarkGray]	1	4					0	19.19	105500000	4	0.0957372	0.0141527	0	0.123307	0.120134	0	0.0916977	0.109285
	-0.346127	0.814903	sp|P43284|TRPB2_MAIZE	sp|P43284|TRPB2_MAIZE	Color [DarkGray]	1	4					0	9.13	1276900000	12	0.814903	-0.346127	0.393843	0.87545	0.793361	0.832345	0.995816	1.27287
+	17.3127	2.39044	sp|P45633|RL10_MAIZE	sp|P45633|RL10_MAIZE	Color [DarkGray]	1	4				+	0	95.957	18808000000	95	2.39044	17.3127	19.8052	25.3609	29.5161	9.09975	6.42192	7.22243
	-0.140967	0.758758	sp|P46251|ADF1_MAIZE;sp|Q43694|ADF2_MAIZE	sp|P46251|ADF1_MAIZE;sp|Q43694|ADF2_MAIZE	Color [DarkGray]	1	4					0	3.64	127650000	5	0.758758	-0.140967	0	0	0	0.311831	0.0560045	0.0550665
+	5.57417	5.32744	sp|P46252|RLA2A_MAIZE	sp|P46252|RLA2A_MAIZE	Color [DarkGray]	1	4				+	0	70.4	5359100000	33	5.32744	5.57417	7.60016	7.53723	7.63613	1.8062	2.33909	1.90572
	-0.0224389	0.296082	sp|P46420|GSTF4_MAIZE	sp|P46420|GSTF4_MAIZE	Color [DarkGray]	1	4					0.0087209	0.67547	44755000	2	0.296082	-0.0224389	0.064362	0	0	0.0685094	0	0.0631693
+	-1.92221	2.99484	sp|P46617|CYF_MAIZE	sp|P46617|CYF_MAIZE	Color [DarkGray]	1	4				+	0	84.957	2099400000	35	2.99484	-1.92221	0.279719	0.253154	0.27029	2.41654	2.41093	1.74233
+	-3.21349	2.77309	sp|P48183|PSBA_MAIZE	sp|P48183|PSBA_MAIZE	Color [DarkGray]	1	4				+	0	49.571	3596200000	30	2.77309	-3.21349	0.307322	0.678947	0.532512	2.89438	4.0694	4.19547
+	-4.51049	3.07079	sp|P48184|PSBD_MAIZE	sp|P48184|PSBD_MAIZE	Color [DarkGray]	1	4				+	0	61.925	5441000000	30	3.07079	-4.51049	0.878806	1.05979	1.10093	4.52993	5.98086	6.0602
+	-0.300675	4.55446	sp|P48186|ATPF_MAIZE	sp|P48186|ATPF_MAIZE	Color [DarkGray]	1	4				+	0	11.35	270470000	5	4.55446	-0.300675	0	0	0	0.284553	0.328588	0.288884
+	-2.41728	1.12833	sp|P48187|PSBC_MAIZE	sp|P48187|PSBC_MAIZE	Color [DarkGray]	1	4					0	62.551	3423200000	22	1.12833	-2.41728	0.86955	0.965071	0.877881	5.33459	2.26103	2.36873
+	198.636	3.09881	sp|P49036|SUS2_MAIZE	sp|P49036|SUS2_MAIZE	Color [DarkGray]	1	4				+	0	323.31	162060000000	448	3.09881	198.636	294.509	221.9	241.781	57.6015	53.3258	51.3551
+	4.6706	1.75865	sp|P49076|ARF_MAIZE	sp|P49076|ARF_MAIZE	Color [DarkGray]	1	4				+	0	112.37	8507900000	72	1.75865	4.6706	11.3091	9.15616	7.7421	3.66264	5.71656	4.81635
+	1.91129	2.05722	sp|P49079|AKH1_MAIZE	sp|P49079|AKH1_MAIZE	Color [DarkGray]	1	4				+	0	20.371	1817400000	28	2.05722	1.91129	2.04574	3.3052	2.23651	0.465388	0.727355	0.660853
+	0.640729	1.38331	sp|P49080|AKH2_MAIZE	sp|P49080|AKH2_MAIZE	Color [DarkGray]	1	4				+	0	10.236	422280000	6	1.38331	0.640729	1.18932	0.491279	0.609761	0.150016	0.116277	0.101884
+	-0.126455	1.44063	sp|P49081|MASY_MAIZE	sp|P49081|MASY_MAIZE	Color [DarkGray]	1	4				+	0	13.48	162960000	6	1.44063	-0.126455	0	0.0767977	0.0228771	0.099944	0.161907	0.217189
+	18.4949	2.38651	sp|P49087|VATA_MAIZE	sp|P49087|VATA_MAIZE	Color [DarkGray]	1	4				+	0	323.31	25397000000	166	2.38651	18.4949	36.8853	26.1232	30.8069	12.1717	13.0994	13.0597
	0.184952	0.630042	sp|P49094|ASNS_MAIZE	sp|P49094|ASNS_MAIZE	Color [DarkGray]	1	4					0	16.875	352310000	13	0.630042	0.184952	0.225479	0.623526	0.233604	0.206006	0.162328	0.15942
+	-0.0520403	1.02213	sp|P49101|CDPK2_MAIZE	sp|P49101|CDPK2_MAIZE	Color [DarkGray]	1	4					0	1.109	66557000	2	1.02213	-0.0520403	0.0501938	0	0	0.0407041	0.0996335	0.0659772
+	0.854302	1.72153	sp|P49104|RAB2B_MAIZE;sp|P49103|RAB2A_MAIZE	sp|P49104|RAB2B_MAIZE;sp|P49103|RAB2A_MAIZE	Color [DarkGray]	1	4				+	0	17.457	1567200000	26	1.72153	0.854302	1.43428	1.77371	1.86001	0.697521	1.19744	0.610136
	0.332642	0.636979	sp|P49105|G6PI_MAIZE	sp|P49105|G6PI_MAIZE	Color [DarkGray]	1	4					0	90.564	2386000000	38	0.636979	0.332642	2.40599	1.5978	2.00964	1.61181	1.68231	1.72137
+	17.6451	2.42121	sp|P49106|14331_MAIZE	sp|P49106|14331_MAIZE	Color [DarkGray]	1	4				+	0	323.31	24476000000	145	2.42121	17.6451	33.8856	24.4788	31.5053	13.7005	12.1103	11.1235
+	-0.349518	3.02345	sp|P49133|TPT_MAIZE	sp|P49133|TPT_MAIZE	Color [DarkGray]	1	4				+	0.0029762	0.80563	347940000	4	3.02345	-0.349518	0.0556386	0.0258067	0	0.319465	0.365559	0.444975
+	-0.0706358	1.50642	sp|P49174|INVA_MAIZE	sp|P49174|INVA_MAIZE	Color [DarkGray]	1	4				+	0	1.6854	74897000	4	1.50642	-0.0706358	0.0297858	0	0	0.0420425	0.101252	0.098399
	0.0619863	0.398308	sp|P49178|GBB_MAIZE	sp|P49178|GBB_MAIZE	Color [DarkGray]	1	4					0	3.3095	21351000	2	0.398308	0.0619863	0.197152	0	0	0.011193	0	0
+	1.95056	2.74657	sp|P49235|HGGL1_MAIZE	sp|P49235|HGGL1_MAIZE	Color [DarkGray]	1	4				+	0	52.733	1064800000	9	2.74657	1.95056	1.59755	2.50326	1.9601	0.0257035	0.0976098	0.0859011
+	1.0199	2.06994	sp|P49249|IN22_MAIZE	sp|P49249|IN22_MAIZE	Color [DarkGray]	1	4				+	0	65.631	1221300000	19	2.06994	1.0199	1.96526	1.25598	1.57006	0.595893	0.655294	0.480414
	-0.053794	0.334104	sp|P49353|FPPS_MAIZE	sp|P49353|FPPS_MAIZE	Color [DarkGray]	1	4					0	1.995	210880000	3	0.334104	-0.053794	0.110291	0.0820802	0.165643	0.291874	0.142873	0.0846489
+	1.32772	3.77938	sp|P49727|UCRI_MAIZE	sp|P49727|UCRI_MAIZE	Color [DarkGray]	1	4				+	0	36.593	3435800000	23	3.77938	1.32772	3.22968	3.51856	3.3744	2.04506	2.13361	1.96079
+	6.93929	2.89542	sp|P51059|CAPP2_MAIZE	sp|P51059|CAPP2_MAIZE	Color [DarkGray]	1	4				+	0	60.79	6593000000	70	2.89542	6.93929	7.62102	10.5205	9.62719	2.23283	2.34334	2.37469
+	4.50955	2.57667	sp|P51421|RL32_MAIZE	sp|P51421|RL32_MAIZE	Color [DarkGray]	1	4				+	0	33.754	4243000000	23	2.57667	4.50955	4.9143	6.02213	7.13629	1.1132	1.56345	1.86742
+	3.74923	3.9028	sp|P51425|RL39_MAIZE	sp|P51425|RL39_MAIZE	Color [DarkGray]	1	4				+	0.005848	0.70028	2240800000	4	3.9028	3.74923	3.59048	4.2741	4.36036	0.173978	0.419653	0.38362
+	-2.34865	2.17037	sp|P52580|IFRH_MAIZE	sp|P52580|IFRH_MAIZE	Color [DarkGray]	1	4				+	0	19.048	2136600000	24	2.17037	-2.34865	0.0397169	0.0192126	0.0249639	1.50765	2.57016	3.05204
+	29.3216	2.40879	sp|P52588|PDI_MAIZE	sp|P52588|PDI_MAIZE	Color [DarkGray]	1	4				+	0	269.46	24367000000	161	2.40879	29.3216	47.2534	32.9323	33.2435	10.9072	6.54711	8.01004
+	3.54464	3.18586	sp|P52855|RLA1_MAIZE	sp|P52855|RLA1_MAIZE	Color [DarkGray]	1	4				+	0	9.9848	2386200000	6	3.18586	3.54464	4.64761	3.79138	3.91312	1.07915	0.311069	0.327981
+	-0.372079	1.39245	sp|P55005|AMYB_MAIZE	sp|P55005|AMYB_MAIZE	Color [DarkGray]	1	4				+	0	47.51	1286000000	27	1.39245	-0.372079	0.934539	0.523521	0.693074	1.11323	1.018	1.13614
+	3.08748	2.65971	sp|P55234|GLGL2_MAIZE;sp|P55241|GLGL1_MAIZE	sp|P55234|GLGL2_MAIZE	Color [DarkGray]	1	4				+	0	97.352	4057700000	49	2.65971	3.08748	4.95789	4.37875	5.74248	1.64745	2.31056	1.8587
	0.639104	0.379011	sp|P55240|GLGS_MAIZE	sp|P55240|GLGS_MAIZE	Color [DarkGray]	1	4					0	15.951	1957100000	14	0.379011	0.639104	0.386387	2.22291	2.69544	1.11359	1.00947	1.26436
+	0.84916	2.10237	sp|P55876|IF5_MAIZE	sp|P55876|IF5_MAIZE	Color [DarkGray]	1	4				+	0	19.396	810810000	18	2.10237	0.84916	0.829145	1.36035	1.19004	0.162948	0.410637	0.258474
+	0.309431	1.08102	sp|P56330|SUI1_MAIZE	sp|P56330|SUI1_MAIZE	Color [DarkGray]	1	4					0	4.9663	367880000	7	1.08102	0.309431	0.204366	0.666606	0.483051	0.136096	0.133637	0.155998
+	-2.63823	4.32754	sp|P58738|EXPB1_MAIZE	sp|P58738|EXPB1_MAIZE	Color [DarkGray]	1	4				+	0	67.297	2541600000	30	4.32754	-2.63823	0.341217	0	0.0826684	2.60568	2.93475	2.79814
	-0.0037244	0.427243	sp|P60138|PSBL_MAIZE	sp|P60138|PSBL_MAIZE	Color [DarkGray]	1	4					0	1.6528	3389500	1	0.427243	-0.0037244	0	0	0	0.0111732	0	0
+	106.84	2.07845	sp|Q41811|H43_MAIZE;sp|P62787|H4_MAIZE	sp|Q41811|H43_MAIZE;sp|P62787|H4_MAIZE	Color [DarkGray]	1	4				+	0	196.33	92492000000	116	2.07845	106.84	182.406	110.392	131.357	45.0026	27.6916	30.9414
+	87.7017	1.89328	sp|P69246|H32_MAIZE	sp|P69246|H32_MAIZE	Color [DarkGray]	1	4				+	0	25.976	71152000000	36	1.89328	87.7017	78.696	99.8907	147.775	19.9591	19.9844	23.3133
+	-1.0353	4.60961	sp|P69388|PSBE_MAIZE	sp|P69388|PSBE_MAIZE	Color [DarkGray]	1	4				+	0	23.836	1123600000	11	4.60961	-1.0353	0.209515	0.0921035	0.141213	1.11999	1.20415	1.2246
+	18.3358	1.93321	sp|P80607|RGP1_MAIZE	sp|P80607|RGP1_MAIZE	Color [DarkGray]	1	4				+	0	251.38	22122000000	107	1.93321	18.3358	36.9709	24.5635	24.9722	12.2393	9.90076	9.35924
+	7.54935	2.47041	sp|P80608|CYSK_MAIZE	sp|P80608|CYSK_MAIZE	Color [DarkGray]	1	4				+	0	185.7	9417700000	74	2.47041	7.54935	12.9769	9.79644	13.2748	3.51431	4.83995	5.04587
+	1.52541	1.18233	sp|P80609|UC03_MAIZE	sp|P80609|UC03_MAIZE	Color [DarkGray]	1	4					0	2.4742	2777800000	8	1.18233	1.52541	4.21665	2.45835	2.68069	2.09237	1.33261	1.35449
+	1.97148	1.63006	sp|P80610|UC04_MAIZE	sp|P80610|UC04_MAIZE	Color [DarkGray]	1	4				+	0	4.0397	2226500000	14	1.63006	1.97148	1.83361	3.14413	3.62394	0.636406	0.940717	1.11012
+	8.58105	2.94152	sp|P80639|IF5A_MAIZE	sp|P80639|IF5A_MAIZE	Color [DarkGray]	1	4				+	0	185.39	18365000000	98	2.94152	8.58105	19.3529	19.4645	18.5292	9.75178	9.35204	12.4996
+	-0.028827	1.11358	sp|P84187|SGAT_MAIZE	sp|P84187|SGAT_MAIZE	Color [DarkGray]	1	4					0.0085227	0.52341	25974000	1	1.11358	-0.028827	0	0	0	0.0529239	0.0137652	0.0197918
+	0.162515	0.901503	sp|P93008|RH21_ARATH	sp|P93008|RH21_ARATH	Color [DarkGray]	1	4					0	0.98286	94079000	2	0.901503	0.162515	0	0.281301	0.206243	0	0	0
+	6.16271	2.43252	sp|P93629|ADHX_MAIZE	sp|P93629|ADHX_MAIZE	Color [DarkGray]	1	4				+	0	125.7	5787400000	58	2.43252	6.16271	10.3435	6.88693	8.13342	2.43015	2.18352	2.26199
+	3.2122	1.67498	sp|P93648|LONM_MAIZE	sp|P93648|LONM_MAIZE	Color [DarkGray]	1	4				+	0	105.5	2643800000	24	1.67498	3.2122	2.28477	5.2639	4.1804	0.628791	0.669402	0.794273
+	0.58547	1.06376	sp|P93703|C71C3_MAIZE	sp|P93703|C71C3_MAIZE	Color [DarkGray]	1	4					0	14.394	736490000	17	1.06376	0.58547	0.396456	1.06234	1.22266	0.210872	0.316747	0.397433
+	15.7503	4.05323	sp|P93804|PGMC1_MAIZE	sp|P93804|PGMC1_MAIZE	Color [DarkGray]	1	4				+	0	323.31	25726000000	208	4.05323	15.7503	27.1616	29.7641	30.286	13.6267	13.3189	13.0151
+	2.58075	2.47445	sp|P93805|PGMC2_MAIZE	sp|P93805|PGMC2_MAIZE	Color [DarkGray]	1	4				+	0	150.46	2962200000	36	2.47445	2.58075	4.49444	3.93329	3.25611	1.68282	0.96825	1.29052
	-2.22361	0.614317	sp|Q00008|PRMS_MAIZE	sp|Q00008|PRMS_MAIZE	Color [DarkGray]	1	4					0	14.592	2456400000	15	0.614317	-2.22361	0.69674	0.330293	0	5.78521	0.786833	1.12582
+	0.945946	2.30797	sp|Q01526|14332_MAIZE	sp|Q01526|14332_MAIZE	Color [DarkGray]	1	4				+	0	29.497	1921400000	18	2.30797	0.945946	1.72052	2.27925	2.00517	1.03178	1.14792	0.987408
+	0.554509	2.48171	sp|Q05327|PDC3_MAIZE	sp|Q05327|PDC3_MAIZE	Color [DarkGray]	1	4				+	0	61.19	640630000	7	2.48171	0.554509	1	0.733185	0.802873	0.314198	0.341527	0.216806
+	5.66276	2.58062	sp|Q05737|YPTM2_MAIZE;sp|P16976|YPTM1_MAIZE	sp|Q05737|YPTM2_MAIZE	Color [DarkGray]	1	4				+	0	14.449	6125200000	27	2.58062	5.66276	7.00517	7.75536	9.77274	2.20191	2.47008	2.873
+	14.5712	4.67935	sp|Q05761|RS13_MAIZE	sp|Q05761|RS13_MAIZE	Color [DarkGray]	1	4				+	0	42.236	11552000000	69	4.67935	14.5712	18.9312	18.4343	16.8433	3.42728	3.47495	3.59308
+	-33.9849	6.29024	sp|Q06509|COMT1_MAIZE	sp|Q06509|COMT1_MAIZE	Color [DarkGray]	1	4				+	0	312.42	35416000000	126	6.29024	-33.9849	4.30306	2.65959	3.97683	37.4176	38.2098	37.2667
+	-0.348362	1.31463	sp|Q07154|EXPB9_MAIZE	sp|Q07154|EXPB9_MAIZE	Color [DarkGray]	1	4				+	0	6.7177	408270000	6	1.31463	-0.348362	0.0850456	0	0.138793	0.188446	0.54743	0.53305
+	-0.154077	1.17067	sp|Q08047|GLGB_MAIZE	sp|Q08047|GLGB_MAIZE	Color [DarkGray]	1	4					0	9.8764	425370000	15	1.17067	-0.154077	0.304215	0.19066	0.153074	0.286485	0.404183	0.419512
+	55.3289	2.88253	sp|Q08062|MDHC_MAIZE	sp|Q08062|MDHC_MAIZE	Color [DarkGray]	1	4				+	0	323.31	64904000000	151	2.88253	55.3289	89.0302	72.2027	92.9844	33.1323	24.298	30.8002
+	1.54059	1.90341	sp|Q08066|RL19_MAIZE	sp|Q08066|RL19_MAIZE	Color [DarkGray]	1	4				+	0	10.898	2160800000	14	1.90341	1.54059	3.2433	2.03156	2.67903	1.23998	1.09214	1
+	4.63419	1.06583	sp|Q08068|RS20_MAIZE	sp|Q08068|RS20_MAIZE	Color [DarkGray]	1	4					0	25.39	4326400000	27	1.06583	4.63419	2.01851	8.95214	6.70092	1.34289	1.1115	1.31463
+	44.7135	2.12984	sp|Q08069|RS8_MAIZE	sp|Q08069|RS8_MAIZE	Color [DarkGray]	1	4				+	0	146.7	42219000000	92	2.12984	44.7135	53.177	50.2755	77.8487	12.8102	18.802	15.5485
+	3.28801	1.79769	sp|Q08275|HSP23_MAIZE	sp|Q08275|HSP23_MAIZE	Color [DarkGray]	1	4				+	0	38.103	2249200000	15	1.79769	3.28801	4.95284	2.35835	4.48918	0.286831	0.789395	0.860128
+	23.6557	1.21003	sp|Q08277|HSP82_MAIZE	sp|Q08277|HSP82_MAIZE	Color [DarkGray]	1	4					0	124.69	25894000000	92	1.21003	23.6557	43.3919	43.971	16.1577	10.1691	11.6864	10.698
+	2.38398	4.94274	sp|Q08704|CFI_MAIZE	sp|Q08704|CFI_MAIZE	Color [DarkGray]	1	4				+	0	34.414	1639100000	26	4.94274	2.38398	2.89909	2.66151	2.77325	0.424842	0.472223	0.284844
+	126.88	3.26541	sp|Q09054|G3PC2_MAIZE	sp|Q09054|G3PC2_MAIZE	Color [DarkGray]	1	4				+	0	323.31	144980000000	240	3.26541	126.88	202.323	201.211	165.815	56.5104	62.5588	69.6397
+	0.868828	1.34658	sp|Q10716|CYSP1_MAIZE	sp|Q10716|CYSP1_MAIZE	Color [DarkGray]	1	4				+	0	72.174	1627400000	20	1.34658	0.868828	1.24005	1.89357	2.05809	0.586102	1.16942	0.829712
+	-1.80912	1.71528	sp|Q10717|CYSP2_MAIZE	sp|Q10717|CYSP2_MAIZE	Color [DarkGray]	1	4				+	0	94.405	3252100000	26	1.71528	-1.80912	0.263085	1.61455	1.49678	2.62912	3.31733	2.85531
+	0.39225	1.59048	sp|Q10724|PPIM_MAIZE	sp|Q10724|PPIM_MAIZE	Color [DarkGray]	1	4				+	0	2.7166	509610000	13	1.59048	0.39225	0.412958	0.776083	0.65407	0.146628	0.26072	0.259012
+	-0.323748	3.13513	sp|Q195N6|PDRP1_MAIZE	sp|Q195N6|PDRP1_MAIZE	Color [DarkGray]	1	4				+	0	6.5284	295200000	8	3.13513	-0.323748	0.0121919	0	0	0.258943	0.361732	0.362761
+	-4.30811	3.20396	sp|Q1ZYQ8|EXB10_MAIZE	sp|Q1ZYQ8|EXB10_MAIZE	Color [DarkGray]	1	4				+	0	45.609	3857100000	42	3.20396	-4.30811	0	0	0	3.55782	4.27566	5.09086
+	-3.37984	4.2045	sp|Q41048|PSBQ1_MAIZE	sp|Q41048|PSBQ1_MAIZE	Color [DarkGray]	1	4				+	0	72.949	3525000000	36	4.2045	-3.37984	0.496141	0.306376	0.298213	4.09118	3.47332	3.67575
	0.291095	0.634698	sp|Q41739|THI42_MAIZE;sp|Q41738|THI41_MAIZE	sp|Q41739|THI42_MAIZE;sp|Q41738|THI41_MAIZE	Color [DarkGray]	1	4					0	96.05	3159200000	59	0.634698	0.291095	2.08571	2.76793	2.56125	2.137	2.26885	2.13576
+	63.6947	4.05801	sp|Q41741|IF4A_MAIZE;sp|Q9CAI7|IF4A3_ARATH	sp|Q41741|IF4A_MAIZE;sp|Q9CAI7|IF4A3_ARATH	Color [DarkGray]	1	4				+	0	323.31	58541000000	215	4.05801	63.6947	76.6308	86.4839	89.7734	19.9829	21.0436	20.7775
+	0.290949	1.42394	sp|Q41745|LPAT_MAIZE	sp|Q41745|LPAT_MAIZE	Color [DarkGray]	1	4				+	0	8.5607	192740000	3	1.42394	0.290949	0.142857	0.363714	0.459611	0	0.0510459	0.0422896
	-0.117023	0.224498	sp|Q41761|HGGL2_MAIZE	sp|Q41761|HGGL2_MAIZE	Color [DarkGray]	1	4					0	120.88	2288400000	37	0.224498	-0.117023	1.57647	1.59529	1.63115	1.32931	1.81051	2.01416
+	6.3594	3.719	sp|Q41764|ADF3_MAIZE	sp|Q41764|ADF3_MAIZE	Color [DarkGray]	1	4				+	0	43.604	6687900000	46	3.719	6.3594	8.12225	9.26818	9.69358	2.47135	2.67842	2.85605
+	2.60729	2.64139	sp|Q41768|ILVB1_MAIZE	sp|Q41768|ILVB1_MAIZE	Color [DarkGray]	1	4				+	0	92.753	2946200000	56	2.64139	2.60729	4.19777	3.26035	4.30156	1	1.31675	1.62105
+	0.718971	2.17216	sp|Q41769|ILVB2_MAIZE	sp|Q41769|ILVB2_MAIZE	Color [DarkGray]	1	4				+	0	14.409	630580000	11	2.17216	0.718971	0.949581	0.716927	1.16783	0.152716	0.3218	0.202906
+	1.70298	3.82853	sp|Q41782|TBB4_MAIZE	sp|Q41782|TBB4_MAIZE	Color [DarkGray]	1	4				+	0	68.943	3860500000	36	3.82853	1.70298	3.83653	3.91329	4.0865	2.0893	2.219	2.41909
+	124.488	3.24916	sp|Q41783|TBB6_MAIZE	sp|Q41783|TBB6_MAIZE	Color [DarkGray]	1	4				+	0	323.31	103480000000	346	3.24916	124.488	174.94	135.27	168.509	33.9465	32.3032	39.0073
+	21.4014	3.65718	sp|Q41784|TBB7_MAIZE	sp|Q41784|TBB7_MAIZE	Color [DarkGray]	1	4				+	0	150.61	28738000000	109	3.65718	21.4014	35.0407	34.9319	35.3265	11.5506	17.007	12.5372
+	223.261	2.48854	sp|Q41803|EF1A_MAIZE	sp|Q41803|EF1A_MAIZE	Color [DarkGray]	1	4				+	0	323.31	221170000000	327	2.48854	223.261	234.637	333.021	345.235	75.9263	75.0608	92.1204
	3.18817	0.727535	sp|Q41806|PSBQ2_MAIZE	sp|Q41806|PSBQ2_MAIZE	Color [DarkGray]	1	4					0	3.4826	2895900000	5	0.727535	3.18817	0	6.08634	5.71765	0	1	1.23949
+	0.71705	1.31412	sp|Q41874|TBG3_MAIZE;sp|Q41808|TBG2_MAIZE;sp|Q41807|TBG1_MAIZE	sp|Q41874|TBG3_MAIZE;sp|Q41808|TBG2_MAIZE;sp|Q41807|TBG1_MAIZE	Color [DarkGray]	1	4				+	0	63.047	611620000	17	1.31412	0.71705	1.41847	0.539141	0.925184	0.199189	0.278378	0.254076
	0.0127828	0.453155	sp|Q41822|IOJAP_MAIZE	sp|Q41822|IOJAP_MAIZE	Color [DarkGray]	1	4					0.0030395	0.89782	19169000	2	0.453155	0.0127828	0	0.0397491	0.0221015	0	0.0110796	0.0124225
	2.43464	0.707363	sp|Q41852|RS21_MAIZE	sp|Q41852|RS21_MAIZE	Color [DarkGray]	1	4					0	4.8792	2264500000	4	0.707363	2.43464	0.0893782	3.95259	5.19611	0	0.918631	1.01552
+	-1.27908	7.44261	sp|Q41864|TRXM_MAIZE	sp|Q41864|TRXM_MAIZE	Color [DarkGray]	1	4				+	0	29.769	1199500000	9	7.44261	-1.27908	0.050342	0.0277381	0.0354797	1.30129	1.33284	1.31668
	0.0231215	0.707029	sp|Q41870|PIP11_MAIZE	sp|Q41870|PIP11_MAIZE	Color [DarkGray]	1	4					0	7.183	124130000	3	0.707029	0.0231215	0.13437	0.0944305	0.0946824	0.0950455	0.0872774	0.0717953
	0.2699	0.786482	sp|Q41898|ATP5E_MAIZE	sp|Q41898|ATP5E_MAIZE	Color [DarkGray]	1	4					0	39.749	389270000	5	0.786482	0.2699	0.139519	0.675258	0.498315	0.145032	0.161129	0.197231
	0.149921	0.810908	sp|Q42368|PPDK2_MAIZE	sp|Q42368|PPDK2_MAIZE	Color [DarkGray]	1	4					0	2.8522	244630000	6	0.810908	0.149921	0.147117	0.281661	0.387431	0.025889	0.147962	0.192595
+	17.5655	2.61391	sp|Q43247|G3PC3_MAIZE	sp|Q43247|G3PC3_MAIZE	Color [DarkGray]	1	4				+	0	264.76	22126000000	92	2.61391	17.5655	30.225	24.7129	29.174	6.60272	11.9825	12.8302
+	-0.0736732	1.75502	sp|Q43250|C71C1_MAIZE	sp|Q43250|C71C1_MAIZE	Color [DarkGray]	1	4				+	0	2.8607	65978000	4	1.75502	-0.0736732	0	0	0	0.0358716	0.0930242	0.0921239
	0.0433012	0.458372	sp|Q43255|C71C2_MAIZE	sp|Q43255|C71C2_MAIZE	Color [DarkGray]	1	4					0	8.8348	193390000	6	0.458372	0.0433012	0.139937	0.136664	0.234204	0.0772745	0.159903	0.143723
	0.173457	0.804743	sp|Q43257|C71C4_MAIZE	sp|Q43257|C71C4_MAIZE	Color [DarkGray]	1	4					0	0.96576	396330000	4	0.804743	0.173457	0.19982	0.535771	0.429499	0.23539	0.205244	0.204085
	1.35339	0.853318	sp|Q43260|DHE3_MAIZE	sp|Q43260|DHE3_MAIZE	Color [DarkGray]	1	4					0	111.1	3861400000	36	0.853318	1.35339	5.17255	3.11148	3.1444	2.94627	2.44641	1.97558
+	16.1329	2.46443	sp|Q43266|PCNA_MAIZE	sp|Q43266|PCNA_MAIZE	Color [DarkGray]	1	4				+	0	184.97	12205000000	72	2.46443	16.1329	25.0305	16.5226	18.2943	4.23391	3.6384	3.57634
+	2.96396	2.69556	sp|Q43270|PLDA1_MAIZE	sp|Q43270|PLDA1_MAIZE	Color [DarkGray]	1	4				+	0	133.9	4953000000	75	2.69556	2.96396	4.91277	5.49615	6.24226	2.28494	2.69155	2.7828
	-0.436284	0.687926	sp|Q43272|GAPN_MAIZE	sp|Q43272|GAPN_MAIZE	Color [DarkGray]	1	4					0	72.281	1423100000	26	0.687926	-0.436284	0.372641	0.875313	0.948995	0.722673	1.44021	1.34291
+	2.5867	4.7974	sp|Q43298|CH62_MAIZE;sp|P29197|CH60A_ARATH	sp|Q43298|CH62_MAIZE	Color [DarkGray]	1	4				+	0	71.681	2418200000	14	4.7974	2.5867	3.3991	3.42866	3.58257	0.734012	1.03846	0.877777
+	-0.10491	2.57288	sp|Q43695|TBB3_MAIZE;CON__ENSEMBL:ENSBTAP00000025008	sp|Q43695|TBB3_MAIZE	Color [DarkGray]	1	4				+	0	42.139	94867000	3	2.57288	-0.10491	0	0	0	0.110314	0.129181	0.0752346
+	8.0039	3.62059	sp|Q43697|TBB5_MAIZE;sp|Q41785|TBB8_MAIZE	sp|Q43697|TBB5_MAIZE;sp|Q41785|TBB8_MAIZE	Color [DarkGray]	1	4				+	0	82.956	8495500000	20	3.62059	8.0039	10.5071	11.8753	11.8908	2.51952	3.89298	3.84911
+	8.70745	2.42633	sp|Q9LFN6|RH56_ARATH;sp|Q56XG6|RH15_ARATH	sp|Q9LFN6|RH56_ARATH;sp|Q56XG6|RH15_ARATH	Color [DarkGray]	1	4				+	0	71.276	6571600000	57	2.42633	8.70745	12.227	7.93023	12.0804	2.35644	1.46742	2.29147
+	-0.177405	2.31377	sp|Q56YU0|AL2C4_ARATH	sp|Q56YU0|AL2C4_ARATH	Color [DarkGray]	1	4				+	0	2.0668	343580000	6	2.31377	-0.177405	0.170295	0.133084	0.108241	0.336168	0.263324	0.344344
	1.10655	0.261644	sp|Q6E0W6|L_MMVR	sp|Q6E0W6|L_MMVR	Color [DarkGray]	1	4					0.003003	0.86833	3848800000	5	0.261644	1.10655	0	5.55854	4.30093	2.1341	2.02877	2.37696
+	1.80881	1.89975	sp|Q6JB11|MEG5_MAIZE	sp|Q6JB11|MEG5_MAIZE	Color [DarkGray]	1	4				+	0	14.055	1358900000	8	1.89975	1.80881	1.34853	2.29163	2.77874	0.305917	0.36478	0.321794
+	105.575	4.06698	sp|Q6XZ78|SCRK2_MAIZE	sp|Q6XZ78|SCRK2_MAIZE	Color [DarkGray]	1	4				+	0	323.31	86618000000	180	4.06698	105.575	134.37	121.768	144.207	29.2741	27.2424	27.1028
+	10.7657	2.55675	sp|Q6XZ79|SCRK1_MAIZE	sp|Q6XZ79|SCRK1_MAIZE	Color [DarkGray]	1	4				+	0	163.2	7820600000	71	2.55675	10.7657	16.1742	10.6621	12.3696	2.62516	2.03522	2.24849
+	15.2685	2.76862	sp|Q7SIC9|TKTC_MAIZE	sp|Q7SIC9|TKTC_MAIZE	Color [DarkGray]	1	4				+	0	323.31	36047000000	199	2.76862	15.2685	33.5815	39.0956	35.8755	18.4111	22.4926	21.8435
+	19.3483	3.68413	sp|Q84RL7|PIP21_MAIZE	sp|Q84RL7|PIP21_MAIZE	Color [DarkGray]	1	4				+	0	78.726	12797000000	34	3.68413	19.3483	19.9271	22.2551	23.7396	4.61762	1.87122	1.38812
+	3.51388	2.04285	sp|Q84TC2|BX6_MAIZE	sp|Q84TC2|BX6_MAIZE	Color [DarkGray]	1	4				+	0	61.697	3351800000	27	2.04285	3.51388	5.18869	3.43618	5.91931	1.16077	1.41294	1.42883
+	2.81468	2.59961	sp|Q84W89|RH37_ARATH;sp|Q9M2F9|RH52_ARATH	sp|Q84W89|RH37_ARATH;sp|Q9M2F9|RH52_ARATH	Color [DarkGray]	1	4				+	0	15.704	3029100000	33	2.59961	2.81468	3.47739	4.53322	4.04111	1.77146	0.927226	0.908996
+	3.61489	5.39881	sp|Q84Y01|ITPK1_MAIZE	sp|Q84Y01|ITPK1_MAIZE	Color [DarkGray]	1	4				+	0	46.772	2165700000	23	5.39881	3.61489	4.06381	3.7723	4.09531	0.347706	0.383233	0.35582
+	0.652614	2.4849	sp|Q8H136|RH14_ARATH;sp|Q9LYJ9|RH46_ARATH	sp|Q8H136|RH14_ARATH	Color [DarkGray]	1	4				+	0	1.2825	487500000	9	2.4849	0.652614	0.990931	0.684958	0.724928	0.2262	0.1163	0.100474
	2.07909	0.313961	sp|Q8H6A5|TCTP_MAIZE	sp|Q8H6A5|TCTP_MAIZE	Color [DarkGray]	1	4					0	142.89	5488400000	32	0.313961	2.07909	11.0884	3.01507	3.24641	3.07153	3.26836	4.77275
+	2.35284	2.90335	sp|Q8H6B1|SPT16_MAIZE	sp|Q8H6B1|SPT16_MAIZE	Color [DarkGray]	1	4				+	0	323.31	1638300000	22	2.90335	2.35284	2.16652	3.10929	2.83039	0.230373	0.489573	0.327737
	0.61726	0.695786	sp|Q8LA13|RH11_ARATH	sp|Q8LA13|RH11_ARATH	Color [DarkGray]	1	4					0	2.3278	566840000	9	0.695786	0.61726	0.171844	1.5319	0.56805	0.173882	0.115479	0.130653
	0.129506	0.764744	sp|Q8LPU4|HAT1_MAIZE	sp|Q8LPU4|HAT1_MAIZE	Color [DarkGray]	1	4					0	1.1396	81983000	1	0.764744	0.129506	0.307355	0.095232	0.0635953	0.0510021	0	0.0266636
	0.150251	0.770813	sp|Q8LPU5|CMT3_MAIZE	sp|Q8LPU5|CMT3_MAIZE	Color [DarkGray]	1	4					0	8.1418	127210000	2	0.770813	0.150251	0	0.283433	0.252429	0.0270342	0.0264495	0.0316254
+	1.08438	1.99086	sp|Q8RXK6|RH8_ARATH;sp|Q94BV4|RH6_ARATH;sp|Q9M2E0|RH12_ARATH	sp|Q8RXK6|RH8_ARATH;sp|Q94BV4|RH6_ARATH	Color [DarkGray]	1	4				+	0	9.9936	955190000	16	1.99086	1.08438	1.43516	1.02792	1.83122	0.255716	0.422053	0.363389
	0.0657603	0.195238	sp|Q8S528|AL2B7_ARATH	sp|Q8S528|AL2B7_ARATH	Color [DarkGray]	1	4					0.0086957	0.66602	293600000	6	0.195238	0.0657603	0.228005	0.464411	0.0518589	0.0874176	0.205731	0.253846
+	-6.11653	3.16365	sp|Q8VXG7|PALY_MAIZE	sp|Q8VXG7|PALY_MAIZE	Color [DarkGray]	1	4				+	0	323.31	7239400000	68	3.16365	-6.11653	0.976723	1.60139	1.21807	6.84929	6.68267	8.61383
+	1.91226	2.31453	sp|Q8W2B7|BX8_MAIZE	sp|Q8W2B7|BX8_MAIZE	Color [DarkGray]	1	4				+	0	61.332	2774800000	34	2.31453	1.91226	2.62668	3.39027	3.74548	1.1906	1.40467	1.4304
+	0.493257	1.30941	sp|Q8W4R3|RH30_ARATH	sp|Q8W4R3|RH30_ARATH	Color [DarkGray]	1	4				+	0	5.3468	454570000	9	1.30941	0.493257	0.311001	0.69147	0.915353	0.145369	0.13879	0.153894
+	2.53274	2.43292	sp|Q8W519|MMT1_MAIZE	sp|Q8W519|MMT1_MAIZE	Color [DarkGray]	1	4				+	0	92.629	2432300000	29	2.43292	2.53274	4.17449	2.7826	3.57166	1.08126	1.0814	0.767868
+	2.3082	2.99177	sp|Q94A52|RH2_ARATH;sp|Q9C8J1|RH34_ARATH	sp|Q94A52|RH2_ARATH	Color [DarkGray]	1	4				+	0	28.975	1566900000	20	2.99177	2.3082	2.2582	3.13958	2.47788	0.224539	0.334393	0.392131
+	0.134267	1.32399	sp|Q9AQU5|PIP13_MAIZE	sp|Q9AQU5|PIP13_MAIZE	Color [DarkGray]	1	4				+	0.0058997	0.71789	180080000	1	1.32399	0.134267	0.255158	0.21174	0.196342	0.143569	0.11687	0
	-0.351899	0.70635	sp|Q9ATM0|TIP12_MAIZE	sp|Q9ATM0|TIP12_MAIZE	Color [DarkGray]	1	4					0	7.7213	318790000	4	0.70635	-0.351899	0	0	0	0.806665	0.123723	0.12531
	0.0371425	0.21149	sp|Q9ATM2|SIP12_MAIZE	sp|Q9ATM2|SIP12_MAIZE	Color [DarkGray]	1	4					0	1.9529	57935000	1	0.21149	0.0371425	0	0	0.199043	0.0521229	0.0354921	0
+	0.22081	1.94229	sp|Q9ATM8|PIP22_MAIZE	sp|Q9ATM8|PIP22_MAIZE	Color [DarkGray]	1	4				+	0	16.695	414480000	9	1.94229	0.22081	0.545725	0.417965	0.401781	0.196259	0.241245	0.265538
+	1.77518	2.77722	sp|Q9AXT8|CMT1_MAIZE	sp|Q9AXT8|CMT1_MAIZE	Color [DarkGray]	1	4				+	0	35.498	1652000000	28	2.77722	1.77518	1.876	2.58313	2.57402	0.51635	0.577623	0.613625
+	0.192615	0.961582	sp|Q9FJR0|RENT1_ARATH	sp|Q9FJR0|RENT1_ARATH	Color [DarkGray]	1	4					0	16.737	211760000	8	0.961582	0.192615	0.0926315	0.326923	0.394025	0.052713	0.0623123	0.120709
+	1.77292	4.23755	sp|Q9FPK7|INO1_MAIZE	sp|Q9FPK7|INO1_MAIZE	Color [DarkGray]	1	4				+	0	83.801	2258300000	39	4.23755	1.77292	2.69278	2.86206	2.8796	0.894284	1.16844	1.05295
+	0.861459	1.49087	sp|Q9FQ11|SPP1_MAIZE	sp|Q9FQ11|SPP1_MAIZE	Color [DarkGray]	1	4				+	0	52.961	2373500000	25	1.49087	0.861459	2.05694	2.67963	2.08318	1.75527	1.28766	1.19244
+	0.467956	2.78785	sp|Q9FUM8|HMT3_MAIZE;sp|Q9FUM9|HMT2_MAIZE	sp|Q9FUM8|HMT3_MAIZE;sp|Q9FUM9|HMT2_MAIZE	Color [DarkGray]	1	4				+	0	14.22	362910000	3	2.78785	0.467956	0.448247	0.656177	0.587022	0.0779404	0.105607	0.104032
+	2.63039	1.33986	sp|Q9FYS5|HMGYA_MAIZE	sp|Q9FYS5|HMGYA_MAIZE	Color [DarkGray]	1	4				+	0	143.4	5167300000	96	1.33986	2.63039	7.22773	4.29172	5.44711	3.56342	2.40266	3.10932
+	0.465478	1.57705	sp|Q9LEF5|SSRP1_MAIZE	sp|Q9LEF5|SSRP1_MAIZE	Color [DarkGray]	1	4				+	0	1.9522	314210000	11	1.57705	0.465478	0.36053	0.786511	0.402145	0.0529635	0.0453932	0.0543967
	0.125301	0.814859	sp|Q9LIH9|RH51_ARATH	sp|Q9LIH9|RH51_ARATH	Color [DarkGray]	1	4					0	2.2173	91637000	3	0.814859	0.125301	0	0.236026	0.179093	0.00726497	0.0179932	0.0139579
+	5.49068	1.09127	sp|Q9M4U4|HDT3_MAIZE;sp|O24591|HDT1_MAIZE	sp|Q9M4U4|HDT3_MAIZE;sp|O24591|HDT1_MAIZE	Color [DarkGray]	1	4					0	120.84	3181000000	41	1.09127	5.49068	10.9142	4.15114	3.7144	1.57236	0.264453	0.470857
+	3.66241	1.88289	sp|Q9M4U5|HDT2_MAIZE	sp|Q9M4U5|HDT2_MAIZE	Color [DarkGray]	1	4				+	0	67.462	3576500000	31	1.88289	3.66241	6.86463	4.18912	4.4157	1.36046	1.47735	1.64442
+	9.91109	1.72553	sp|Q9SE94|MTHR1_MAIZE	sp|Q9SE94|MTHR1_MAIZE	Color [DarkGray]	1	4				+	0	323.31	25217000000	167	1.72553	9.91109	30.3655	21.684	24.113	15.7743	15.6293	15.0256
+	-0.710885	1.19041	sp|Q9SLZ0|PCKA_MAIZE	sp|Q9SLZ0|PCKA_MAIZE	Color [DarkGray]	1	4					0	15.365	802930000	15	1.19041	-0.710885	0.0661385	0.154219	0.145898	0.352453	0.826496	1.31996
+	34.6023	3.27545	sp|Q9SP22|CALR_MAIZE	sp|Q9SP22|CALR_MAIZE	Color [DarkGray]	1	4				+	0	293.16	34870000000	125	3.27545	34.6023	55.4157	44.5275	46.5203	14.8916	12.9278	14.8373
	0.225501	0.606632	sp|Q9SQV1|RH40_ARATH	sp|Q9SQV1|RH40_ARATH	Color [DarkGray]	1	4					0	1.5878	133960000	4	0.606632	0.225501	0.569815	0	0.251446	0.0703191	0	0.0744393
+	0.30918	1.68348	sp|Q9SU63|AL2B4_ARATH	sp|Q9SU63|AL2B4_ARATH	Color [DarkGray]	1	4				+	0	63.457	2348100000	22	1.68348	0.30918	1.91563	1.94057	1.91286	1.45817	1.64196	1.74139
+	7.46653	4.32522	sp|Q9SX04|MCM32_MAIZE;sp|Q9SX03|MCM33_MAIZE;sp|Q43704|MCM31_MAIZE	sp|Q9SX04|MCM32_MAIZE;sp|Q9SX03|MCM33_MAIZE;sp|Q43704|MCM31_MAIZE	Color [DarkGray]	1	4				+	0	156.84	5350300000	72	4.32522	7.46653	8.05022	9.32237	8.93967	1.0531	1.4036	1.45596
+	0.345996	2.55254	sp|Q9SYP1|DEXHC_ARATH	sp|Q9SYP1|DEXHC_ARATH	Color [DarkGray]	1	4				+	0	11.913	227960000	6	2.55254	0.345996	0.311132	0.450481	0.404877	0	0.0202494	0.108253
	0.0966878	0.39025	sp|Q9TJN6|RR17_MAIZE	sp|Q9TJN6|RR17_MAIZE	Color [DarkGray]	1	4					0	4.1954	320080000	3	0.39025	0.0966878	0.241126	0.356974	0.285228	0.298137	0	0.295127
+	2.85164	1.19427	sp|Q9XF59|PIP12_MAIZE	sp|Q9XF59|PIP12_MAIZE	Color [DarkGray]	1	4					0	60.787	2994200000	22	1.19427	2.85164	1.70768	5.31491	4.6676	0.762526	1.33024	1.04249
	0.0558871	0.2061	sp|Q9XFH3|MAD2_MAIZE	sp|Q9XFH3|MAD2_MAIZE	Color [DarkGray]	1	4					0.0059347	0.75098	63437000	2	0.2061	0.0558871	0.289777	0	0	0.122116	0	0
	-0.0255131	0.427243	sp|Q9XGD5|CAMT2_MAIZE	sp|Q9XGD5|CAMT2_MAIZE	Color [DarkGray]	1	4					0	46.232	23219000	1	0.427243	-0.0255131	0	0	0	0.0765394	0	0
+	-0.634637	1.43642	sp|Q9XGD6|CAMT1_MAIZE	sp|Q9XGD6|CAMT1_MAIZE	Color [DarkGray]	1	4				+	0	172.79	2804300000	30	1.43642	-0.634637	1.97844	1.49629	1.49058	2.38261	2.44761	2.039
+	5.50232	4.26073	sp|Q9XHR2|EIF3A_MAIZE	sp|Q9XHR2|EIF3A_MAIZE	Color [DarkGray]	1	4				+	0	72.606	5444600000	63	4.26073	5.50232	7.06984	7.65836	8.00766	2.31534	1.85708	2.05651
+	0.0470687	1.38767	sp|Q9XIK4|NT101_ARATH	sp|Q9XIK4|NT101_ARATH	Color [DarkGray]	1	4				+	0	1.9228	57657000	2	1.38767	0.0470687	0.0551643	0.10138	0.056473	0.0326226	0.0181093	0.0210792
+	0.14466	1.05582	sp|Q9ZSV1|PARP1_MAIZE;sp|O50017|PARP2_MAIZE	sp|Q9ZSV1|PARP1_MAIZE;sp|O50017|PARP2_MAIZE	Color [DarkGray]	1	4					0	4.6786	156790000	6	1.05582	0.14466	0.0770271	0.274507	0.251025	0.0242263	0.066658	0.0776937
+	-4.19301	1.38102	sp|Q9ZT00|RCA_MAIZE	sp|Q9ZT00|RCA_MAIZE	Color [DarkGray]	1	4				+	0	250.09	5494000000	53	1.38102	-4.19301	4.28967	0.0750626	0.0211784	5.61643	5.83104	5.51746
+	12.7541	2.9946	sp|Q9ZT66|E134_MAIZE	sp|Q9ZT66|E134_MAIZE	Color [DarkGray]	1	4				+	0	63.722	8194700000	31	2.9946	12.7541	11.2312	15.8199	15.4753	1.07364	1.53828	1.6522
	0.089234	0.526061	sp|Q9ZTP4|ZDS_MAIZE	sp|Q9ZTP4|ZDS_MAIZE	Color [DarkGray]	1	4					0.003012	0.86932	131350000	4	0.526061	0.089234	0	0.191411	0.24579	0.0513647	0.0632496	0.0548851
