# Supplementary material for: Physiological Mechanisms Underlying Tassel Symptom Formation in Maize Infected with Sporisorium reilianum
Source: Plants (Basel). 2024 Jan 15;13(2):238. doi: 10.3390/plants13020238 (PMC10820020; doi:10.3390/plants13020238)
Supplement: Supplementary file 1 [file plants-13-00238-s001.zip › AC_report.xlsx]

## Sheet: Dataset(AC)
Name of datase: AC
No. of identified items: 259 of 259
No. of unidentified items: 0
ID type: ProteinAccesion
Number of mapped protein: 259
Is dataset quantitative :NO
Mapped items:
UniProt accession			UniProt ID	UniProt accession	Protein name	Gene	Alt Accessions
A1Y2B7			SGS3_MAIZE	A1Y2B7	Protein SUPPRESSOR OF GENE SILENCING 3 homolog	Name=SGS3; Synonyms=LBL1;	A1Y2B7;
A4KA61			PRO12_MAIZE	A4KA61	Profilin-12		A4KA61;
A4KA58			PROF9_MAIZE	A4KA58	Profilin-9		A4KA58;
A5H453			PER42_MAIZE	A5H453	Peroxidase 42	Name=PER42; Synonyms=POX3-1, PRX42;	A5H453;
B1P123			BX7_MAIZE	B1P123	TRIBOA-glucoside O-methyltransferase BX7	Name=BX7; Synonyms=ZRP4;	B1P123;
B2LXS7			WHY1_MAIZE	B2LXS7	Single-stranded DNA-binding protein WHY1, chloroplastic	Name=WHY1;	B2LXS7;
B4FBQ7			CSPL6_MAIZE	B4FBQ7	CASP-like protein 2A1		B4FBQ7;
B4G072			BX9_MAIZE	B4G072	DIMBOA UDP-glucosyltransferase BX9	Name=BX9;	B4G072; Q8W2B6;
B4G0F3			MTBC_MAIZE	B4G0F3	Probable bifunctional methylthioribulose-1-phosphate dehydratase/enolase-phosphatase E1 {ECO:0000255|HAMAP-Rule:MF_03118}		B4G0F3; B6T6D3;
B6SGC5			CNR6_MAIZE	B6SGC5	Cell number regulator 6	Name=CNR6;	B6SGC5;
B6SHG7			TRMB_MAIZE	B6SHG7	tRNA (guanine-N(7)-)-methyltransferase {ECO:0000255|HAMAP-Rule:MF_03055}		B6SHG7;
B6SXH2			URM1_MAIZE	B6SXH2	Ubiquitin-related modifier 1 homolog {ECO:0000255|HAMAP-Rule:MF_03048}	Name=URM1 {ECO:0000255|HAMAP-Rule:MF_03048};	B6SXH2;
B6TB21			DRE2_MAIZE	B6TB21	Anamorsin homolog {ECO:0000255|HAMAP-Rule:MF_03115}		B6TB21;
B6TTW1			CYNS_MAIZE	B6TTW1	Cyanate hydratase {ECO:0000255|HAMAP-Rule:MF_03139}	Name=CYN {ECO:0000255|HAMAP-Rule:MF_03139};	B6TTW1; C4J2E0;
B6TVL4			CAS_MAIZE	B6TVL4	Calcium sensing receptor, chloroplastic		B6TVL4;
B6TZD1			MTNA_MAIZE	B6TZD1	Methylthioribose-1-phosphate isomerase {ECO:0000255|HAMAP-Rule:MF_03119}	Name=IDI2;	B6TZD1; B6TL88; B8A2A0; Q5XTZ5;
C0PF72			ARGJ_MAIZE	C0PF72	Arginine biosynthesis bifunctional protein ArgJ, chloroplastic {ECO:0000255|HAMAP-Rule:MF_03124}		C0PF72;
D9HP23			CNR7_MAIZE	D9HP23	Cell number regulator 7	Name=CNR7;	D9HP23; B6TSN2;
F4IHS2			SYD_ARATH	F4IHS2	Chromatin structure-remodeling complex protein SYD	Name=SYD; Synonyms=CHR3; OrderedLocusNames=At2g28290; ORFNames=T3B23;	F4IHS2; F4IHS3; F4IHS4; Q5BN47; Q8L9D7; Q9AUB4; Q9SL27;
O22424			RS4_MAIZE	O22424	40S ribosomal protein S4	Name=RPS4;	O22424;
Q9FR39			PROF5_MAIZE	Q9FR39	Profilin-5	Name=PRO5;	Q9FR39;
Q9LZQ9			DEAH2_ARATH	Q9LZQ9	Probable pre-mRNA-splicing factor ATP-dependent RNA helicase DEAH2 {ECO:0000305}	OrderedLocusNames=At3g62310 {ECO:0000312|Araport:AT3G62310};ORFNames=T12C14_10 {ECO:0000312|EMBL:CAB82945.1};	Q9LZQ9;
O23813			SIR_MAIZE	O23813	Sulfite reductase [ferredoxin], chloroplastic	Name=SIR;	O23813;
O24413			RLA3_MAIZE	O24413	60S acidic ribosomal protein P3	Name=RPP3A;	O24413;
O24415			RLA2B_MAIZE	O24415	60S acidic ribosomal protein P2B	Name=RPP2B;	O24415;
O24562			CADH_MAIZE	O24562	Probable cinnamyl alcohol dehydrogenase	Name=CAD; Synonyms=BM1;	O24562; O64408;
O24573			RLA0_MAIZE	O24573	60S acidic ribosomal protein P0	Name=RP-P0;	O24573;
O24578			PURA_MAIZE	O24578	Adenylosuccinate synthetase, chloroplastic {ECO:0000255|HAMAP-Rule:MF_03125}	Name=PURA {ECO:0000255|HAMAP-Rule:MF_03125};	O24578;
O48556			IPYR_MAIZE	O48556	Soluble inorganic pyrophosphatase	Name=IPP;	O48556;
O48557			RL17_MAIZE	O48557	60S ribosomal protein L17	Name=RPL17;	O48557;
O48558			RL30_MAIZE	O48558	60S ribosomal protein L30	Name=RPL30;	O48558;
O48950			TATB_MAIZE	O48950	Sec-independent protein translocase protein TATB, chloroplastic {ECO:0000305}	Name=TATB {ECO:0000305|PubMed:10402459};Synonyms=HCF106 {ECO:0000303|PubMed:9367960};ORFNames=ZEAMMB73_Zm00001d003913 {ECO:0000312|EMBL:ONM17954.1};	O48950; A0A1D6ECA8;
O64411			PAO_MAIZE	O64411	Polyamine oxidase	Name=PAO;	O64411;
O64964			TIP11_MAIZE	O64964	Aquaporin TIP1-1	Name=TIP1-1; Synonyms=TIP1;	O64964;
O65107			PSAN_MAIZE	O65107	Photosystem I reaction center subunit N, chloroplastic	Name=PSAN;	O65107;
O81395			DRTS_MAIZE	O81395	Bifunctional dihydrofolate reductase-thymidylate synthase	Name=DRTS;	O81395;
O81482			IF4E2_MAIZE	O81482	Eukaryotic translation initiation factor isoform 4E-2		O81482;
O82106			ZM33_MAIZE	O82106	Anther-specific protein MZm3-3		O82106;
P00333			ADH1_MAIZE	P00333	Alcohol dehydrogenase 1	Name=ADH1;	P00333;
P00412			COX2_MAIZE	P00412	Cytochrome c oxidase subunit 2	Name=COX2; Synonyms=COXII, MOX1;	P00412;
P00827			ATPB_MAIZE	P00827	ATP synthase subunit beta, chloroplastic {ECO:0000255|HAMAP-Rule:MF_01347}	Name=atpB {ECO:0000255|HAMAP-Rule:MF_01347};	P00827;
P00835			ATPE_MAIZE	P00835	ATP synthase epsilon chain, chloroplastic {ECO:0000255|HAMAP-Rule:MF_00530}	Name=atpE {ECO:0000255|HAMAP-Rule:MF_00530};	P00835;
P00874			RBL_MAIZE	P00874	Ribulose bisphosphate carboxylase large chain {ECO:0000255|HAMAP-Rule:MF_01338}	Name=rbcL {ECO:0000255|HAMAP-Rule:MF_01338};	P00874;
P02582			ACT1_MAIZE	P02582	Actin-1	Name=ACT1; Synonyms=ACT-1;	P02582;
P04707			ADH2_MAIZE	P04707	Alcohol dehydrogenase 2	Name=ADH2;	P04707;
P04709			ADT1_MAIZE	P04709	ADP,ATP carrier protein 1, mitochondrial	Name=ANT1; Synonyms=ANT-G1;	P04709;
P04711			CAPP1_MAIZE	P04711	Phosphoenolpyruvate carboxylase 1	Name=PEP1; Synonyms=PPC;	P04711;
P04712			SUS1_MAIZE	P04712	Sucrose synthase 1	Name=SH-1;	P04712;
P04713			SSG1_MAIZE	P04713	Granule-bound starch synthase 1, chloroplastic/amyloplastic	Name=WAXY;	P04713;
P04907			GSTF3_MAIZE	P04907	Glutathione S-transferase 3	Name=GST3;	P04907; P15542;
P04966			PSAA_MAIZE	P04966	Photosystem I P700 chlorophyll a apoprotein A1 {ECO:0000255|HAMAP-Rule:MF_00458}	Name=psaA {ECO:0000255|HAMAP-Rule:MF_00458}; Synonyms=ps1a1;	P04966;
P04967			PSAB_MAIZE	P04967	Photosystem I P700 chlorophyll a apoprotein A2 {ECO:0000255|HAMAP-Rule:MF_00482}	Name=psaB {ECO:0000255|HAMAP-Rule:MF_00482}; Synonyms=ps1a2;	P04967;
P05022			ATPA_MAIZE	P05022	ATP synthase subunit alpha, chloroplastic {ECO:0000255|HAMAP-Rule:MF_01346}	Name=atpA {ECO:0000255|HAMAP-Rule:MF_01346};	P05022;
P05348			RBS_MAIZE	P05348	Ribulose bisphosphate carboxylase small chain, chloroplastic	Name=RBCS;	P05348; Q43355;
P05494			ATPAM_MAIZE	P05494	ATP synthase subunit alpha, mitochondrial	Name=ATPA;	P05494;
P05641			PSBB_MAIZE	P05641	Photosystem II CP47 reaction center protein {ECO:0000255|HAMAP-Rule:MF_01495}	Name=psbB {ECO:0000255|HAMAP-Rule:MF_01495};	P05641;
P05642			CYB6_MAIZE	P05642	Cytochrome b6 {ECO:0000255|HAMAP-Rule:MF_00633}	Name=petB {ECO:0000255|HAMAP-Rule:MF_00633};	P05642; Q33298; Q36712;
P05643			PETD_MAIZE	P05643	Cytochrome b6-f complex subunit 4 {ECO:0000255|HAMAP-Rule:MF_01344}	Name=petD {ECO:0000255|HAMAP-Rule:MF_01344};	P05643; Q33299;
P06671			CB22_MAIZE	P06671	Chlorophyll a-b binding protein, chloroplastic		P06671;
P08440			ALF_MAIZE	P08440	Fructose-bisphosphate aldolase, cytoplasmic isozyme		P08440;
P08529			RK14_MAIZE	P08529	50S ribosomal protein L14, chloroplastic {ECO:0000255|HAMAP-Rule:MF_01367}	Name=rpl14 {ECO:0000255|HAMAP-Rule:MF_01367};	P08529;
P08735			G3PC1_MAIZE	P08735	Glyceraldehyde-3-phosphate dehydrogenase 1, cytosolic	Name=GAPC1; Synonyms=GAPC, GPC1;	P08735;
P09233			SODM1_MAIZE	P09233	Superoxide dismutase [Mn] 3.1, mitochondrial	Name=SODA.4; Synonyms=SOD3, SOD3.1;	P09233;
P09315			G3PA_MAIZE	P09315	Glyceraldehyde-3-phosphate dehydrogenase A, chloroplastic	Name=GAPA; Synonyms=GPA1;	P09315; P15985;
P0C1M0			ATPG_MAIZE	P0C1M0	ATP synthase subunit gamma, chloroplastic		P0C1M0;
P0C1Y5			EXB11_MAIZE	P0C1Y5	Expansin-B11	Name=EXPB11;	P0C1Y5;
P10581			RPOP_MAIZE	P10581	Probable DNA-directed RNA polymerase		P10581;
P10979			GRPA_MAIZE	P10979	Glycine-rich RNA-binding, abscisic acid-inducible protein	Name=RAB15;	P10979;
P11143			HSP70_MAIZE	P11143	Heat shock 70 kDa protein	Name=HSP70;	P11143;
P11155			PPDK1_MAIZE	P11155	Pyruvate, phosphate dikinase 1, chloroplastic {ECO:0000303|PubMed:1668653}	Name=PPDK1 {ECO:0000303|PubMed:1668653};Synonyms=C4PPDKZM1 {ECO:0000303|PubMed:1668653},CYPPDKZM1 {ECO:0000303|PubMed:1668653},PPDK2 {ECO:0000303|PubMed:2158100};	P11155; C5IHE0; Q41846; Q41847; Q42367; Q7DMU6; Q9XGW9;
P11601			PSAC_MAIZE	P11601	Photosystem I iron-sulfur center {ECO:0000255|HAMAP-Rule:MF_01303}	Name=psaC {ECO:0000255|HAMAP-Rule:MF_01303}; Synonyms=frxA;	P11601;
P12329			CB21_MAIZE	P12329	Chlorophyll a-b binding protein 1, chloroplastic	Name=CAB1;	P12329;
P12863			TPIS_MAIZE	P12863	Triosephosphate isomerase, cytosolic		P12863;
P13689			ABP1_MAIZE	P13689	Auxin-binding protein 1 {ECO:0000303|PubMed:2555179}	Name=ABP1 {ECO:0000303|PubMed:2555179};Synonyms=AUX311 {ECO:0000303|PubMed:1650260};	P13689; Q41193;
P14641			TBA2_MAIZE	P14641	Tubulin alpha-2 chain	Name=TUBA2; Synonyms=TUA2;	P14641;
P15718			POLB_MAIZE	P15718	Putative Pol polyprotein from transposon element Bs1		P15718;
P15719			MDHP_MAIZE	P15719	Malate dehydrogenase [NADP], chloroplastic		P15719;
P16166			UFOG1_MAIZE	P16166	Anthocyanidin 3-O-glucosyltransferase	Name=BZ1; Synonyms=UGT71A1;	P16166; Q9ATX0;
P16243			MAOC_MAIZE	P16243	NADP-dependent malic enzyme, chloroplastic	Name=MOD1; Synonyms=ME1;	P16243;
P18025			TBB1_MAIZE	P18025	Tubulin beta-1 chain	Name=TUBB1; Synonyms=TUB1;	P18025;
P18122			CATA1_MAIZE	P18122	Catalase isozyme 1	Name=CAT1;	P18122;
P18123			CATA3_MAIZE	P18123	Catalase isozyme 3	Name=CAT3;	P18123;
P19023			ATPBM_MAIZE	P19023	ATP synthase subunit beta, mitochondrial	Name=ATPB; Synonyms=ATP2;	P19023;
P19124			NDHJ_MAIZE	P19124	NAD(P)H-quinone oxidoreductase subunit J, chloroplastic {ECO:0000255|HAMAP-Rule:MF_01357}	Name=ndhJ {ECO:0000255|HAMAP-Rule:MF_01357};	P19124;
P19862			PHYA1_MAIZE	P19862	Phytochrome A	Name=PHYA1;	P19862;
P19950			RS141_MAIZE	P19950	40S ribosomal protein S14		P19950;
P19951			RS142_MAIZE	P19951	40S ribosomal protein S14		P19951;
P21569			CYPH_MAIZE	P21569	Peptidyl-prolyl cis-trans isomerase	Name=CYP; Synonyms=ROT1;	P21569;
P22198			PP1_MAIZE	P22198	Serine/threonine-protein phosphatase PP1	Name=PP1;	P22198;
P22275			TBA3_MAIZE	P22275	Tubulin alpha-3 chain	Name=TUBA3; Synonyms=TUA3;	P22275;
P23111			CDC2_MAIZE	P23111	Cell division control protein 2 homolog	Name=CDC2;	P23111;
P23225			GLTB_MAIZE	P23225	Ferredoxin-dependent glutamate synthase, chloroplastic	Name=GLSF;	P23225;
P23345			SODC4_MAIZE	P23345	Superoxide dismutase [Cu-Zn] 4A	Name=SODCC.3; Synonyms=SOD4A;	P23345;
P23444			H1_MAIZE	P23444	Histone H1		P23444;
P24067			BIP2_MAIZE	P24067	Luminal-binding protein 2	Name=BIPE2;	P24067;
P24631			HSP21_MAIZE	P24631	17.5 kDa class II heat shock protein		P24631;
P24993			PSBH_MAIZE	P24993	Photosystem II reaction center protein H {ECO:0000255|HAMAP-Rule:MF_00752}	Name=psbH {ECO:0000255|HAMAP-Rule:MF_00752};	P24993;
P25460			RS11_MAIZE	P25460	40S ribosomal protein S11	Name=RPS11;	P25460;
P26216			PGLR1_MAIZE	P26216	Exopolygalacturonase	Name=PG1;andName=PG2;andName=PG3;andName=PG6;andName=PG14;	P26216;
P26301			ENO1_MAIZE	P26301	Enolase 1	Name=ENO1; Synonyms=PGH1;	P26301;
P27347			MNB1B_MAIZE	P27347	DNA-binding protein MNB1B	Name=MNB1B;	P27347;
P27497			CB29_MAIZE	P27497	Chlorophyll a-b binding protein M9, chloroplastic	Name=CAB-M9;	P27497;
P27787			FER1_MAIZE	P27787	Ferredoxin-1, chloroplastic {ECO:0000305}	Name=FDX1 {ECO:0000305}; Synonyms=pFD1 {ECO:0000303|PubMed:16668188};	P27787;
P27923			RS27A_MAIZE	P27923	Ubiquitin-40S ribosomal protein S27a	Name=UBF9; Synonyms=RPS27A;	P27923; O82079; P03993; P69319;
P28516			PDC1_MAIZE	P28516	Pyruvate decarboxylase 1	Name=PDC1; Synonyms=PDC;	P28516;
P28523			CSK2A_MAIZE	P28523	Casein kinase II subunit alpha	Name=ACK2;	P28523;
P29022			CHIA_MAIZE	P29022	Endochitinase A {ECO:0000303|PubMed:1551872}		P29022;
P29036			FRI1_MAIZE	P29036	Ferritin-1, chloroplastic	Name=FER1;	P29036; Q43258;
P29038			LDH_MAIZE	P29038	L-lactate dehydrogenase		P29038;
P29185			CH61_MAIZE	P29185	Chaperonin CPN60-1, mitochondrial	Name=CPN60I; Synonyms=CPNA;	P29185; Q43251; Q43252;
P29390			FRI2_MAIZE	P29390	Ferritin-2, chloroplastic	Name=FER2;	P29390; Q43259;
P30756			H2B2_MAIZE	P30756	Histone H2B.2		P30756;
P30792			PMGI_MAIZE	P30792	2,3-bisphosphoglycerate-independent phosphoglycerate mutase		P30792;
P31726			CYT1_MAIZE	P31726	Cystatin-1	Name=RAMDAZC7;	P31726;
Q02245			TBA5_MAIZE	Q02245	Tubulin alpha-5 chain	Name=TUBA5; Synonyms=TUA5;	Q02245;
P33679			ZEAM_MAIZE	P33679	Zeamatin	Name=Zlp;	P33679;
P35081			PROF1_MAIZE	P35081	Profilin-1	Name=PRO1; Synonyms=PRF1;	P35081;
P35082			PROF2_MAIZE	P35082	Profilin-2	Name=PRO2; Synonyms=PRF2;	P35082;
P35083			PROF3_MAIZE	P35083	Profilin-3	Name=PRO3; Synonyms=PRF3;	P35083;
P35339			PGLR3_MAIZE	P35339	Exopolygalacturonase	Name=PG2C;	P35339;
P38559			GLNA1_MAIZE	P38559	Glutamine synthetase root isozyme 1	Name=GLN6; Synonyms=GS1-1;	P38559;
P38560			GLNA2_MAIZE	P38560	Glutamine synthetase root isozyme 2	Name=GLN2; Synonyms=GS1-2;	P38560;
P38561			GLNA3_MAIZE	P38561	Glutamine synthetase root isozyme 3	Name=GLN4; Synonyms=GS1-3;	P38561;
P38563			GLNA5_MAIZE	P38563	Glutamine synthetase root isozyme 5	Name=GS1-5;	P38563;
P40280			H2A_MAIZE	P40280	Histone H2A		P40280;
P41040			CALM_MAIZE	P41040	Calmodulin	Name=CALM1;	P41040;
P41980			SODM4_MAIZE	P41980	Superoxide dismutase [Mn] 3.4, mitochondrial	Name=SODA.3; Synonyms=SOD3.4;	P41980;
P42057			VDAC_MAIZE	P42057	Outer plastidial membrane protein porin	Name=POR1;	P42057;
P42856			ZB14_MAIZE	P42856	14 kDa zinc-binding protein	Name=ZBP14; Synonyms=PKCI;	P42856;
P42895			ENO2_MAIZE	P42895	Enolase 2	Name=ENO2;	P42895;
P43188			KADC_MAIZE	P43188	Adenylate kinase, chloroplastic	Name=ADK1;	P43188;
P45633			RL10_MAIZE	P45633	60S ribosomal protein L10	Name=RPL10;	P45633;
P46252			RLA2A_MAIZE	P46252	60S acidic ribosomal protein P2A	Name=RPP2A; Synonyms=RPP2;	P46252;
P46617			CYF_MAIZE	P46617	Cytochrome f	Name=petA;	P46617;
P48183			PSBA_MAIZE	P48183	Photosystem II protein D1 {ECO:0000255|HAMAP-Rule:MF_01379}	Name=psbA {ECO:0000255|HAMAP-Rule:MF_01379};	P48183; Q546V9;
P48184			PSBD_MAIZE	P48184	Photosystem II D2 protein {ECO:0000255|HAMAP-Rule:MF_01383}	Name=psbD {ECO:0000255|HAMAP-Rule:MF_01383};	P48184;
P48186			ATPF_MAIZE	P48186	ATP synthase subunit b, chloroplastic {ECO:0000255|HAMAP-Rule:MF_01398}	Name=atpF {ECO:0000255|HAMAP-Rule:MF_01398};	P48186;
P48187			PSBC_MAIZE	P48187	Photosystem II CP43 reaction center protein {ECO:0000255|HAMAP-Rule:MF_01496}	Name=psbC {ECO:0000255|HAMAP-Rule:MF_01496};	P48187;
P49036			SUS2_MAIZE	P49036	Sucrose synthase 2	Name=SUS1;	P49036;
P49076			ARF_MAIZE	P49076	ADP-ribosylation factor	Name=ARF1;	P49076;
P49079			AKH1_MAIZE	P49079	Bifunctional aspartokinase/homoserine dehydrogenase 1, chloroplastic	Name=AKHSDH1;	P49079;
P49080			AKH2_MAIZE	P49080	Bifunctional aspartokinase/homoserine dehydrogenase 2, chloroplastic	Name=AKHSDH2;	P49080;
P49081			MASY_MAIZE	P49081	Malate synthase, glyoxysomal	Name=LIP;	P49081;
P49087			VATA_MAIZE	P49087	V-type proton ATPase catalytic subunit A		P49087; Q41775;
P49101			CDPK2_MAIZE	P49101	Calcium-dependent protein kinase 2	Name=CPK2; Synonyms=CDPK2;	P49101;
P49104			RAB2B_MAIZE	P49104	Ras-related protein Rab-2-B	Name=RAB2B;	P49104;
P49106			14331_MAIZE	P49106	14-3-3-like protein GF14-6	Name=GRF1;	P49106;
P49133			TPT_MAIZE	P49133	Triose phosphate/phosphate translocator, chloroplastic	Name=TPT;	P49133;
P49174			INVA_MAIZE	P49174	Beta-fructofuranosidase, cell wall isozyme		P49174;
P49235			HGGL1_MAIZE	P49235	4-hydroxy-7-methoxy-3-oxo-3,4-dihydro-2H-1,4-benzoxazin-2-yl glucoside beta-D-glucosidase 1, chloroplastic	Name=GLU1;	P49235;
P49249			IN22_MAIZE	P49249	IN2-2 protein	Name=IN2-2; Synonyms=SAF2;	P49249;
P49727			UCRI_MAIZE	P49727	Cytochrome b-c1 complex subunit Rieske, mitochondrial		P49727;
P51059			CAPP2_MAIZE	P51059	Phosphoenolpyruvate carboxylase 2	Name=PEP4; Synonyms=PEP;	P51059;
P51421			RL32_MAIZE	P51421	60S ribosomal protein L32	Name=RPL32;	P51421;
P51425			RL39_MAIZE	P51425	60S ribosomal protein L39	Name=RPL39; Synonyms=EC2E;	P51425;
P52580			IFRH_MAIZE	P52580	Isoflavone reductase homolog IRL	Name=IRL;	P52580;
P52588			PDI_MAIZE	P52588	Protein disulfide-isomerase	Name=PDI;	P52588;
P52855			RLA1_MAIZE	P52855	60S acidic ribosomal protein P1	Name=RPP1A;	P52855; O24414;
P55005			AMYB_MAIZE	P55005	Beta-amylase	Name=BMY1;	P55005;
P55234			GLGL2_MAIZE	P55234	Glucose-1-phosphate adenylyltransferase large subunit 2, chloroplastic/amyloplastic	Name=AGP2;	P55234;
P55876			IF5_MAIZE	P55876	Eukaryotic translation initiation factor 5	Name=EIF5;	P55876; Q9SBX1;
P56330			SUI1_MAIZE	P56330	Protein translation factor SUI1 homolog	Name=TIF;	P56330;
P58738			EXPB1_MAIZE	P58738	Expansin-B1	Name=EXPB1; Synonyms=EXPB1A;	P58738; Q84UA7;
Q41811			H43_MAIZE	Q41811	Histone H4.3	Name=H4;	Q41811;
P69246			H32_MAIZE	P69246	Histone H3.2	Name=H3C2;andName=H3C3;andName=H3C4;	P69246; P05203; P05329; P05330; Q53X03;
P69388			PSBE_MAIZE	P69388	Cytochrome b559 subunit alpha {ECO:0000255|HAMAP-Rule:MF_00642}	Name=psbE {ECO:0000255|HAMAP-Rule:MF_00642};	P69388; P05169; P10879; Q95H57;
P80607			RGP1_MAIZE	P80607	Probable UDP-arabinopyranose mutase 1 {ECO:0000305}	Name=UPTG {ECO:0000303|Ref.4};	P80607; Q9SAQ2;
P80608			CYSK_MAIZE	P80608	Cysteine synthase		P80608;
P80609			UC03_MAIZE	P80609	Unknown protein from spot 146 of 2D-PAGE of etiolated coleoptile		P80609;
P80610			UC04_MAIZE	P80610	Unknown protein from spot 128 of 2D-PAGE of etiolated coleoptile		P80610;
P80639			IF5A_MAIZE	P80639	Eukaryotic translation initiation factor 5A	Name=TIF5A;	P80639; P56332;
P84187			SGAT_MAIZE	P84187	Serine--glyoxylate aminotransferase		P84187;
P93008			RH21_ARATH	P93008	DEAD-box ATP-dependent RNA helicase 21	Name=RH21; OrderedLocusNames=At2g33730; ORFNames=T1B8.4;	P93008;
P93629			ADHX_MAIZE	P93629	Alcohol dehydrogenase class-3	Name=FDH;	P93629;
P93648			LONM_MAIZE	P93648	Lon protease homolog, mitochondrial {ECO:0000255|HAMAP-Rule:MF_03120}	Name=LON2;	P93648;
P93703			C71C3_MAIZE	P93703	Cytochrome P450 71C3	Name=CYP71C3; Synonyms=BX5;	P93703; Q43256;
P93804			PGMC1_MAIZE	P93804	Phosphoglucomutase, cytoplasmic 1		P93804;
P93805			PGMC2_MAIZE	P93805	Phosphoglucomutase, cytoplasmic 2		P93805;
Q01526			14332_MAIZE	Q01526	14-3-3-like protein GF14-12	Name=GRF2;	Q01526;
Q05327			PDC3_MAIZE	Q05327	Pyruvate decarboxylase 3	Name=PDC3;	Q05327;
Q05737			YPTM2_MAIZE	Q05737	GTP-binding protein YPTM2	Name=YPTM2;	Q05737;
Q05761			RS13_MAIZE	Q05761	40S ribosomal protein S13	Name=RPS13;	Q05761;
Q06509			COMT1_MAIZE	Q06509	Caffeic acid 3-O-methyltransferase		Q06509;
Q07154			EXPB9_MAIZE	Q07154	Expansin-B9	Name=EXPB9; Synonyms=EXPB1B;	Q07154; Q84UA8;
Q08047			GLGB_MAIZE	Q08047	1,4-alpha-glucan-branching enzyme 2, chloroplastic/amyloplastic	Name=SBE1;	Q08047;
Q08062			MDHC_MAIZE	Q08062	Malate dehydrogenase, cytoplasmic {ECO:0000303|Ref.1}		Q08062; B2ZAF9; C4IZW9;
Q08066			RL19_MAIZE	Q08066	60S ribosomal protein L19	Name=RPL19;	Q08066;
Q08068			RS20_MAIZE	Q08068	40S ribosomal protein S20	Name=RPS20;	Q08068;
Q08069			RS8_MAIZE	Q08069	40S ribosomal protein S8	Name=RPS8;	Q08069;
Q08275			HSP23_MAIZE	Q08275	17.0 kDa class II heat shock protein	Name=HSP18;	Q08275;
Q08277			HSP82_MAIZE	Q08277	Heat shock protein 82	Name=HSP82;	Q08277;
Q08704			CFI_MAIZE	Q08704	Chalcone--flavonone isomerase	Name=CHI; Synonyms=CHI1;	Q08704;
Q09054			G3PC2_MAIZE	Q09054	Glyceraldehyde-3-phosphate dehydrogenase 2, cytosolic	Name=GAPC2; Synonyms=GPC2;	Q09054;
Q10716			CYSP1_MAIZE	Q10716	Cysteine proteinase 1	Name=CCP1;	Q10716;
Q10717			CYSP2_MAIZE	Q10717	Cysteine proteinase 2	Name=CCP2;	Q10717;
Q10724			PPIM_MAIZE	Q10724	Peptidyl-prolyl cis-trans isomerase, microsomal		Q10724;
Q195N6			PDRP1_MAIZE	Q195N6	Pyruvate, phosphate dikinase regulatory protein, chloroplastic	Name=PDRP1;	Q195N6;
Q1ZYQ8			EXB10_MAIZE	Q1ZYQ8	Expansin-B10	Name=EXPB10;	Q1ZYQ8;
Q41048			PSBQ1_MAIZE	Q41048	Oxygen-evolving enhancer protein 3-1, chloroplastic	Name=PSBQ1; Synonyms=PSBQ;	Q41048;
Q41741			IF4A_MAIZE	Q41741	Eukaryotic initiation factor 4A		Q41741;
Q41745			LPAT_MAIZE	Q41745	1-acyl-sn-glycerol-3-phosphate acyltransferase PLS1	Name=PLS1;	Q41745;
Q41764			ADF3_MAIZE	Q41764	Actin-depolymerizing factor 3	Name=ADF3; Synonyms=ABP3;	Q41764;
Q41768			ILVB1_MAIZE	Q41768	Acetolactate synthase 1, chloroplastic	Name=ALS1; Synonyms=AHAS108;	Q41768;
Q41769			ILVB2_MAIZE	Q41769	Acetolactate synthase 2, chloroplastic	Name=ALS2; Synonyms=AHAS109;	Q41769;
Q41782			TBB4_MAIZE	Q41782	Tubulin beta-4 chain	Name=TUBB4; Synonyms=TUB4;	Q41782; Q43696;
Q41783			TBB6_MAIZE	Q41783	Tubulin beta-6 chain	Name=TUBB6; Synonyms=TUB6;	Q41783;
Q41784			TBB7_MAIZE	Q41784	Tubulin beta-7 chain	Name=TUBB7; Synonyms=TUB7;	Q41784;
Q41803			EF1A_MAIZE	Q41803	Elongation factor 1-alpha	Name=EF1A;	Q41803;
Q41874			TBG3_MAIZE	Q41874	Tubulin gamma-3 chain	Name=TUBG3; Synonyms=TUBC, TUBG;	Q41874;
Q41864			TRXM_MAIZE	Q41864	Thioredoxin M-type, chloroplastic	Name=TRM1;	Q41864;
Q43247			G3PC3_MAIZE	Q43247	Glyceraldehyde-3-phosphate dehydrogenase 3, cytosolic	Name=GAPC3; Synonyms=GPC3;	Q43247; Q06476;
Q43250			C71C1_MAIZE	Q43250	3-hydroxyindolin-2-one monooxygenase	Name=CYP71C1; Synonyms=BX4;	Q43250; Q43254;
Q43266			PCNA_MAIZE	Q43266	Proliferating cell nuclear antigen	Name=PCNA;	Q43266;
Q43270			PLDA1_MAIZE	Q43270	Phospholipase D alpha 1	Name=PLD1;	Q43270;
Q43298			CH62_MAIZE	Q43298	Chaperonin CPN60-2, mitochondrial	Name=CPN60II; Synonyms=CPNB;	Q43298; Q43253;
Q43695			TBB3_MAIZE	Q43695	Tubulin beta-3 chain	Name=TUBB3; Synonyms=TUB3;	Q43695;
Q43697			TBB5_MAIZE	Q43697	Tubulin beta-5 chain	Name=TUBB5; Synonyms=TUB5;	Q43697;
Q9LFN6			RH56_ARATH	Q9LFN6	DEAD-box ATP-dependent RNA helicase 56	Name=RH56; Synonyms=UAP56B; OrderedLocusNames=At5g11200;ORFNames=F2I11.90;	Q9LFN6; Q93VJ8;
Q56YU0			AL2C4_ARATH	Q56YU0	Aldehyde dehydrogenase family 2 member C4	Name=ALDH2C4; Synonyms=REF1; OrderedLocusNames=At3g24503;ORFNames=MOB24.3;	Q56YU0; Q9LV57;
Q6JB11			MEG5_MAIZE	Q6JB11	Protein MATERNALLY EXPRESSED GENE 5	Name=MEG5;	Q6JB11;
Q6XZ78			SCRK2_MAIZE	Q6XZ78	Fructokinase-2	Name=FRK2;	Q6XZ78;
Q6XZ79			SCRK1_MAIZE	Q6XZ79	Fructokinase-1	Name=FRK1;	Q6XZ79;
Q7SIC9			TKTC_MAIZE	Q7SIC9	Transketolase, chloroplastic		Q7SIC9;
Q84RL7			PIP21_MAIZE	Q84RL7	Aquaporin PIP2-1	Name=PIP2-1;	Q84RL7; Q9ATM9;
Q84TC2			BX6_MAIZE	Q84TC2	DIBOA-glucoside dioxygenase BX6	Name=BX6;	Q84TC2;
Q84W89			RH37_ARATH	Q84W89	DEAD-box ATP-dependent RNA helicase 37	Name=RH37; OrderedLocusNames=At2g42520; ORFNames=F14N22.21;	Q84W89; Q9SIN6;
Q84Y01			ITPK1_MAIZE	Q84Y01	Inositol-tetrakisphosphate 1-kinase 1	Name=ITPK1; Synonyms=LPA2;	Q84Y01;
Q8H136			RH14_ARATH	Q8H136	DEAD-box ATP-dependent RNA helicase 14	Name=RH14; Synonyms=DRH1; OrderedLocusNames=At3g01540;ORFNames=F4P13.9;	Q8H136; O64430; Q8W4F5; Q93WJ3;
Q8H6B1			SPT16_MAIZE	Q8H6B1	FACT complex subunit SPT16	Name=SPT16; Synonyms=GTC102;	Q8H6B1;
Q8RXK6			RH8_ARATH	Q8RXK6	DEAD-box ATP-dependent RNA helicase 8	Name=RH8; OrderedLocusNames=At4g00660; ORFNames=F6N23.6;	Q8RXK6; O65275; Q9ZS12;
Q8VXG7			PALY_MAIZE	Q8VXG7	Phenylalanine/tyrosine ammonia-lyase	Name=PAL1;	Q8VXG7;
Q8W2B7			BX8_MAIZE	Q8W2B7	DIMBOA UDP-glucosyltransferase BX8	Name=Bx8;	Q8W2B7;
Q8W4R3			RH30_ARATH	Q8W4R3	DEAD-box ATP-dependent RNA helicase 30	Name=RH30; OrderedLocusNames=At5g63120; ORFNames=MDC12.8;	Q8W4R3; Q0WVX4; Q9FML1; Q9ZRZ7;
Q8W519			MMT1_MAIZE	Q8W519	Methionine S-methyltransferase	Name=MMT1; Synonyms=MMT;	Q8W519; Q9XFH6;
Q94A52			RH2_ARATH	Q94A52	Eukaryotic initiation factor 4A-III homolog {ECO:0000305}	Name=EIF4A3 {ECO:0000303|PubMed:19435936};Synonyms=RH2 {ECO:0000303|PubMed:24743583};OrderedLocusNames=At3g19760 {ECO:0000312|Araport:AT3G19760};ORFNames=MMB12.25 {ECO:0000312|EMBL:BAB02563.1}, MMB12.4;	Q94A52; Q9ZS14;
Q9AQU5			PIP13_MAIZE	Q9AQU5	Aquaporin PIP1-3/PIP1-4	Name=PIP1-3;andName=PIP1-4;	Q9AQU5;
Q9ATM8			PIP22_MAIZE	Q9ATM8	Aquaporin PIP2-2	Name=PIP2-2;	Q9ATM8;
Q9AXT8			CMT1_MAIZE	Q9AXT8	DNA (cytosine-5)-methyltransferase 1	Name=MET2A;	Q9AXT8;
Q9FJR0			RENT1_ARATH	Q9FJR0	Regulator of nonsense transcripts 1 homolog	Name=UPF1; Synonyms=LBA1; OrderedLocusNames=At5g47010;ORFNames=MQD22.15;	Q9FJR0; Q8S3K7;
Q9FPK7			INO1_MAIZE	Q9FPK7	Inositol-3-phosphate synthase		Q9FPK7; O65196;
Q9FQ11			SPP1_MAIZE	Q9FQ11	Sucrose-phosphatase 1	Name=SPP1;	Q9FQ11;
Q9FUM8			HMT3_MAIZE	Q9FUM8	Homocysteine S-methyltransferase 3	Name=HMT-3;	Q9FUM8;
Q9FYS5			HMGYA_MAIZE	Q9FYS5	HMG-Y-related protein A	Name=HMGIY2 {ECO:0000303|PubMed:11278346};ORFNames=GRMZM2G106133 {ECO:0000305}, Zm.66288;	Q9FYS5;
Q9LEF5			SSRP1_MAIZE	Q9LEF5	FACT complex subunit SSRP1	Name=SSRP1;	Q9LEF5;
Q9M4U4			HDT3_MAIZE	Q9M4U4	Histone deacetylase HDT3	Name=HDT3; Synonyms=HD2C;	Q9M4U4;
Q9M4U5			HDT2_MAIZE	Q9M4U5	Histone deacetylase HDT2	Name=HDT2; Synonyms=HD2B;	Q9M4U5;
Q9SE94			MTHR1_MAIZE	Q9SE94	Methylenetetrahydrofolate reductase 1		Q9SE94;
Q9SLZ0			PCKA_MAIZE	Q9SLZ0	Phosphoenolpyruvate carboxykinase (ATP)		Q9SLZ0;
Q9SP22			CALR_MAIZE	Q9SP22	Calreticulin	Name=CRT;	Q9SP22;
Q9SU63			AL2B4_ARATH	Q9SU63	Aldehyde dehydrogenase family 2 member B4, mitochondrial	Name=ALDH2B4; Synonyms=ALDH2; OrderedLocusNames=At3g48000;ORFNames=T17F15.130;	Q9SU63; Q42090;
Q9SX04			MCM32_MAIZE	Q9SX04	DNA replication licensing factor MCM3 homolog 2	Name=ROA2;	Q9SX04;
Q9SYP1			DEXHC_ARATH	Q9SYP1	DExH-box ATP-dependent RNA helicase DExH12 {ECO:0000305}	Name=BRR2A {ECO:0000303|PubMed:19261069};Synonyms=EMB1507 {ECO:0000303|PubMed:15266054};OrderedLocusNames=At1g20960 {ECO:0000312|Araport:AT1G20960};ORFNames=F9H16.5 {ECO:0000312|EMBL:AAD30595.1};	Q9SYP1; Q56Z02; Q8W577;
Q9XF59			PIP12_MAIZE	Q9XF59	Aquaporin PIP1-2	Name=PIP1-2;	Q9XF59;
Q9XGD6			CAMT1_MAIZE	Q9XGD6	Caffeoyl-CoA O-methyltransferase 1	Name=CCOAOMT1;	Q9XGD6;
Q9XHR2			EIF3A_MAIZE	Q9XHR2	Eukaryotic translation initiation factor 3 subunit A {ECO:0000255|HAMAP-Rule:MF_03000}	Name=TIF3A1; Synonyms=IF3A;	Q9XHR2;
Q9XIK4			NT101_ARATH	Q9XIK4	RNA cytidine acetyltransferase 1 {ECO:0000255|HAMAP-Rule:MF_03211}	OrderedLocusNames=At1g10490; ORFNames=T10O24.10;	Q9XIK4; Q0WVY1;
Q9ZSV1			PARP1_MAIZE	Q9ZSV1	Poly [ADP-ribose] polymerase 1	Name=PARP1;	Q9ZSV1; O24570;
Q9ZT00			RCA_MAIZE	Q9ZT00	Ribulose bisphosphate carboxylase/oxygenase activase, chloroplastic	Name=RCA1; Synonyms=RCA;	Q9ZT00;
Q9ZT66			E134_MAIZE	Q9ZT66	Endo-1,3		Q9ZT66;

## Sheet: Cellular component
Analysis: Cellular component
Dataset name: AC
Number of proteins in the dataset: 259
Number of proteins in the dataset (which are available in Cellular component database) :219
Number of proteins in background: 41689
Is analysis quantitative: No
						Corrected p-values
Cellular component	No. of genes in the dataset	No.of genes in the background dataset	Percentage of proteins	Fold enrichment	P-value (Hypergeometric test)	Bonferroni method	BH method	Q-value (Storey-Tibshirani method)
extracellular region	11	1810	4.2471	0.979065	0.572681	1	1	1	A5H453; O82106; P0C1Y5; P26216; P35339; P49174; P58738; P80607; Q07154; Q1ZYQ8; Q9ZT66;
cytosol	11	1795	4.2471	0.987246	0.561504	1	1	1	B6TTW1; F4IHS2; Q9LZQ9; P08440; P21569; Q56YU0; Q6XZ78; Q9AQU5; Q9FJR0; Q9SYP1; Q9XF59;
mitochondrion	8	1392	3.0888	0.92618	0.637484	1	1	1	B6TVL4; P09233; P10581; P15719; P18123; P49727; Q43298; Q9SU63;
nucleus	21	5364	8.10811	0.630437	0.994134	1	1	1	B2LXS7; B6SHG7; B6TZD1; F4IHS2; P23444; P27347; P27923; P30756; P40280; P49106; Q41811; P69246; P93008; Q01526; Q43266; Q8H6B1; Q94A52; Q9AXT8; Q9LEF5; Q9SX04; Q9ZSV1;
plasma membrane	9	2958	3.4749	0.490264	0.995622	1	1	1	B4FBQ7; O48950; Q05737; Q08062; Q84RL7; Q9AQU5; Q9ATM8; Q9FJR0; Q9XF59;
plasmodesma	3	765	1.1583	0.633293	0.856216	1	1	1	B6TZD1; P80607; Q9FJR0;
cytoplasm	60	3544	23.166	2.72542	6.32838e-13	4.61972e-10	4.61972e-10	2.93706e-09	A4KA61; A4KA58; B4G0F3; B6SXH2; B6TZD1; Q9FR39; Q9LZQ9; O48556; O81482; P00333; P02582; P04707; P04711; P08735; P12863; P14641; P18025; P22275; P23345; P24631; P29038; P30792; Q02245; P35081; P35082; P35083; P38559; P38560; P38561; P38563; P51059; P52580; P80608; P93008; P93629; P93804; P93805; Q08275; Q08277; Q09054; Q41764; Q41782; Q41783; Q41784; Q41803; Q43247; Q43695; Q43697; Q9LFN6; Q84TC2;…
Golgi apparatus	2	710	0.772201	0.455656	0.936411	1	1	1	P49076; P80607;
vacuole	1	684	0.3861	0.237664	0.986406	1	1	1	Q10717;
cell wall	8	914	3.0888	1.41054	0.210602	1	1	1	P0C1Y5; P26216; P35339; P49174; P58738; P80607; Q07154; Q1ZYQ8;
chloroplast	20	8175	7.72201	0.393971	1	1	1	1	O24578; P00874; P04713; P05348; P09315; P11155; P16243; P27787; P29036; P29390; P43188; P49079; P49080; P49235; P55234; Q08047; Q41768; Q41769; Q41864; Q9SU63;
integral component of membrane	31	9869	11.9691	0.505747	0.999999	1	1	1	B4FBQ7; B6SGC5; B6TVL4; D9HP23; O48950; O64964; P00412; P04709; P04966; P04967; P05641; P05642; P05643; P06671; P12329; P24993; P27497; P48183; P48184; P48186; P48187; P49133; P49727; P69388; P93703; Q41745; Q43250; Q84RL7; Q9AQU5; Q9ATM8; Q9XF59;
nucleolus	13	496	5.01931	4.22174	1.61571e-05	0.0117946	0.00393155	0.0249955	Q9LZQ9; P93008; Q9LFN6; Q84W89; Q8H136; Q8RXK6; Q8W4R3; Q94A52; Q9FYS5; Q9M4U4; Q9M4U5; Q9SYP1; Q9XIK4;
peroxisome	3	224	1.1583	2.16274	0.163627	1	1	1	P18122; P84187; Q84W89;
endoplasmic reticulum	2	639	0.772201	0.506283	0.908586	1	1	1	Q10724; Q9XF59;
apoplast	1	635	0.3861	0.256003	0.98146	1	1	1	P15719;
chloroplast stroma	8	1093	3.0888	1.17954	0.369559	1	1	1	B2LXS7; C0PF72; O23813; P15719; P23225; P27787; Q195N6; Q9ZT00;
membrane	7	1114	2.7027	1.01282	0.540747	1	1	1	P0C1Y5; P58738; Q07154; Q1ZYQ8; Q43270; Q94A52; Q9SYP1;
intracellular membrane-bounded organelle	1	525	0.3861	0.309641	0.962844	1	1	1	Q10724;
chloroplast envelope	3	573	1.1583	0.845492	0.6929	1	1	1	P04966; P04967; P15719;
mitochondrial matrix	5	171	1.9305	4.71543	0.00443485	1	0.350801	1	P09233; P29185; P41980; P93648; Q9SU63;
amyloplast	3	82	1.1583	5.90751	0.0146391	1	0.788389	1	P04713; P55234; Q08047;
intracellular	2	289	0.772201	1.11941	0.537372	1	1	1	P19862; Q84Y01;
plastoglobule	2	125	0.772201	2.58795	0.182442	1	1	1	P04966; P04967;
chloroplast thylakoid membrane	26	6485	10.0386	0.645557	0.996257	1	1	1	B6TVL4; O48950; O65107; P00827; P00835; P04966; P04967; P05022; P05641; P05642; P05643; P06671; P0C1M0; P11601; P12329; P19124; P24993; P27497; P46617; P48183; P48184; P48186; P48187; P69388; Q41048; Q7SIC9;
chloroplast membrane	1	294	0.3861	0.552923	0.840978	1	1	1	P49133;
mitochondrial inner membrane	4	348	1.5444	1.85463	0.172033	1	1	1	P00412; P04709; P05494; P49727;
cytoskeleton	7	330	2.7027	3.41898	0.0048055	1	0.350801	1	A4KA61; A4KA58; Q9FR39; P02582; P35081; P35082; P35083;
endoplasmic reticulum lumen	4	98	1.5444	6.58535	0.00332943	1	0.303811	1	P13689; P24067; P52588; Q9SP22;
plant-type vacuole membrane	1	156	0.3861	1.04202	0.622437	1	1	1	O64964;
glyoxysome	1	61	0.3861	2.66456	0.316432	1	1	1	P49081;
respiratory chain	2	174	0.772201	1.8592	0.294158	1	1	1	P00412; P49727;
actin cytoskeleton	1	41	0.3861	3.96403	0.225577	1	1	1	Q41764;
thylakoid	1	223	0.3861	0.728957	0.751788	1	1	1	P15719;
nucleoplasm	1	125	0.3861	1.30041	0.541672	1	1	1	Q94A52;
protein complex	6	48	2.3166	20.1487	5.35086e-07	0.000390612	0.000195306	0.00124169	P04907; P08735; Q09054; Q43247; Q84RL7; Q9XF59;
mitochondrial outer membrane	1	38	0.3861	4.27689	0.210948	1	1	1	P42057;
chloroplast nucleoid	1	34	0.3861	4.77991	0.191014	1	1	1	O23813;
mitochondrial membrane	1	137	0.3861	1.18652	0.574798	1	1	1	P05494;
chromosome	2	71	0.772201	4.55598	0.0722661	1	1	1	Q8H6B1; Q9LEF5;
extrinsic component of membrane	1	78	0.3861	2.0839	0.385257	1	1	1	Q41048;
microtubule	10	358	3.861	4.50033	9.15902e-05	0.0668609	0.0133722	0.0850157	P14641; P18025; P22275; Q02245; Q41782; Q41783; Q41784; Q41874; Q43695; Q43697;
spliceosomal complex	3	83	1.1583	5.83635	0.0151198	1	0.788389	1	Q9LZQ9; Q9LFN6; Q9SYP1;
mitochondrial proton-transporting ATP synthase complex, catalytic core F(1)	1	13	0.3861	12.4954	0.0778324	1	1	1	P19023;
proton-transporting ATP synthase complex, catalytic core F(1)	5	504	1.9305	1.59994	0.205829	1	1	1	P00827; P00835; P05022; P05494; P0C1M0;
proton-transporting ATP synthase complex, coupling factor F(o)	1	455	0.3861	0.357277	0.942224	1	1	1	P48186;
nuclear speck	1	81	0.3861	2.00672	0.396665	1	1	1	Q94A52;
P-body	2	58	0.772201	5.57697	0.0506284	1	1	1	Q8RXK6; Q9FJR0;
pore complex	1	36	0.3861	4.51443	0.201043	1	1	1	P42057;
catalytic step 2 spliceosome	2	34	0.772201	9.5125	0.0189261	1	0.921069	1	P93008; Q94A52;
cytoplasmic stress granule	1	23	0.3861	7.06496	0.133571	1	1	1	Q8RXK6;
photosystem II	8	968	3.0888	1.33186	0.255878	1	1	1	P05641; P06671; P12329; P24993; P27497; P48183; P48184; P48187;
photosystem I	7	844	2.7027	1.33683	0.272652	1	1	1	O65107; P04966; P04967; P06671; P11601; P12329; P27497;
ribosome	12	1891	4.6332	1.02224	0.511607	1	1	1	O22424; O48558; P19950; P19951; P25460; P27923; P45633; P51421; P51425; Q05761; Q08066; Q08068;
integral component of mitochondrial membrane	1	2	0.3861	80.878	0.0123869	1	0.753536	1	P42057;
mitochondrial intermembrane space	1	81	0.3861	2.00672	0.396665	1	1	1	B6TB21;
integral component of thylakoid membrane	1	128	0.3861	1.26994	0.550187	1	1	1	P46617;
nucleosome	6	219	2.3166	4.41688	0.00258386	1	0.298938	1	P23444; P30756; P40280; Q41811; P69246; Q9FYS5;
eukaryotic translation initiation factor 3 complex	1	13	0.3861	12.4954	0.0778324	1	1	1	Q9XHR2;
phosphopyruvate hydratase complex	2	13	0.772201	24.867	0.00286653	1	0.298938	1	P26301; P42895;
gamma-tubulin complex	1	14	0.3861	11.6035	0.0835633	1	1	1	Q41874;
90S preribosome	1	11	0.3861	14.7652	0.0662633	1	1	1	Q9XIK4;
MCM complex	1	21	0.3861	7.73749	0.122698	1	1	1	Q9SX04;
exon-exon junction complex	1	6	0.3861	27.049	0.036704	1	1	1	Q94A52;
plastid outer membrane	1	8	0.3861	20.2952	0.048638	1	1	1	P42057;
endoplasmic reticulum-Golgi intermediate compartment membrane	1	10	0.3861	16.2402	0.0604246	1	1	1	P49104;
photosystem II oxygen evolving complex	1	83	0.3861	1.95838	0.404153	1	1	1	Q41048;
U5 snRNP	1	9	0.3861	18.0427	0.0545496	1	1	1	P93008;
photosystem II reaction center	1	1228	0.3861	0.132381	0.999577	1	1	1	P69388;
cytosolic large ribosomal subunit	5	180	1.9305	4.47967	0.00549703	1	0.364803	1	O24413; O24415; O24573; P46252; P52855;
large ribosomal subunit	2	474	0.772201	0.682517	0.795109	1	1	1	O48557; P08529;
chloroplast ribosome	2	2	0.772201	160.955	3.84492e-05	0.0280679	0.00701697	0.0446115	P08529; Q08069;
proton-transporting V-type ATPase, V1 domain	1	24	0.3861	6.77071	0.138957	1	1	1	P49087;

## Sheet: Molecular function
Analysis: Molecular function
Dataset name: AC
Number of proteins in the dataset: 259
Number of proteins in the dataset (which are available in Molecular function database) :241
Number of proteins in background: 41689
Is analysis quantitative: No
						Corrected p-values
Molecular function	No. of genes in the dataset	No.of genes in the background dataset	Percentage of proteins	Fold enrichment	P-value (Hypergeometric test)	Bonferroni method	BH method	Q-value (Storey-Tibshirani method)
zinc ion binding	8	683	3.0888	1.8876	0.0647452	1	1	1	O24562; P00333; P04707; P13689; P93629; Q9FJR0; Q9FUM8; Q9ZSV1;
metal ion binding	30	5156	11.583	0.936822	0.67763	1	1	1	A5H453; B6TB21; O23813; O24578; P04966; P04967; P06671; P11155; P11601; P12329; P16243; P18122; P18123; P22198; P23225; P23345; P27497; P27787; P27923; P41980; P48183; P48184; P48187; P49727; P69388; Q05327; Q84TC2; Q9M4U4; Q9M4U5; Q9XGD6;
ATP binding	46	4173	17.7606	1.77463	9.0872e-05	0.248989	0.0207491	0.133481	F4IHS2; Q9LZQ9; P00827; P02582; P05022; P05494; P11143; P11155; P19023; P23111; P24067; P28523; P29185; P38559; P38560; P38561; P38563; P43188; P48186; P49079; P49080; P49087; P49101; P55234; P93008; P93648; Q08277; Q195N6; Q41741; Q43298; Q9LFN6; Q6XZ78; Q6XZ79; Q84W89; Q84Y01; Q8H136; Q8RXK6; Q8W4R3; Q94A52; Q9FJR0; Q9SLZ0; Q9SU63; Q9SX04; Q9SYP1; Q9XIK4; Q9ZT00;
protein domain specific binding	2	122	0.772201	2.65159	0.175777	1	1	1	P49106; Q01526;
ATPase binding	1	10	0.3861	16.2402	0.0604246	1	1	1	P29185;
DNA binding	19	2568	7.33591	1.19149	0.247837	1	1	1	B2LXS7; B6TTW1; F4IHS2; O23813; P10581; P23444; P30756; P40280; P49106; Q41811; P69246; P93648; Q01526; Q43266; Q9AXT8; Q9FJR0; Q9LEF5; Q9SX04; Q9ZSV1;
protein complex binding	7	13	2.7027	86.7253	5.47462e-13	1.50004e-09	1.50004e-09	9.64993e-09	O24413; O24415; O24573; P46252; P49106; P52855; Q01526;
pyridoxal phosphate binding	1	180	0.3861	0.903087	0.675085	1	1	1	Q8W519;
catalytic activity	1	29	0.3861	5.60375	0.16539	1	1	1	P42856;
identical protein binding	1	188	0.3861	0.86466	0.690955	1	1	1	B6TTW1;
oxidoreductase activity	4	588	1.5444	1.09765	0.497403	1	1	1	P04966; P04967; P49249; P52580;
protein homodimerization activity	2	281	0.772201	1.15128	0.522304	1	1	1	P04907; P19862;
protein dimerization activity	2	600	0.772201	0.539191	0.888818	1	1	1	B1P123; Q06509;
hydrolase activity	3	237	1.1583	2.04411	0.183468	1	1	1	Q9M4U4; Q9M4U5; Q9ZT66;
calcium ion binding	6	488	2.3166	1.98222	0.0853294	1	1	1	P41040; P49101; Q41048; Q43270; Q7SIC9; Q9SP22;
magnesium ion binding	12	1006	4.6332	1.92152	0.0243672	1	1	1	B4G0F3; O48556; P00874; P26301; P28516; P42895; P93804; P93805; Q41768; Q41769; Q84Y01; Q9FQ11;
NAD binding	3	262	1.1583	1.84907	0.223213	1	1	1	P09315; P16243; Q9ZSV1;
carbohydrate binding	1	403	0.3861	0.403377	0.919841	1	1	1	Q9SP22;
O-methyltransferase activity	1	49	0.3861	3.31697	0.26328	1	1	1	B1P123;
nucleotide binding	1	81	0.3861	2.00672	0.396665	1	1	1	P15718;
heme binding	9	1333	3.4749	1.08792	0.447419	1	1	1	A5H453; O23813; P05642; P18122; P18123; P46617; P69388; P93703; Q43250;
iron ion binding	4	729	1.5444	0.885352	0.665626	1	1	1	P05642; P46617; P93703; Q43250;
hydrolase activity, hydrolyzing O-glycosyl compounds	1	82	0.3861	1.98226	0.40042	1	1	1	Q08047;
protein serine/threonine kinase activity	3	678	1.1583	0.714555	0.794649	1	1	1	P28523; P49101; Q195N6;
methyltransferase activity	1	79	0.3861	2.05752	0.389083	1	1	1	B6TB21;
serine-type endopeptidase activity	1	216	0.3861	0.75258	0.74066	1	1	1	P93648;
copper ion binding	1	282	0.3861	0.57645	0.82854	1	1	1	P00412;
ATPase activity	2	179	0.772201	1.80727	0.305597	1	1	1	F4IHS2; Q8H136;
transporter activity	4	175	1.5444	3.68796	0.024091	1	1	1	P04709; P49133; Q9AQU5; Q9XF59;
manganese ion binding	3	150	1.1583	3.22962	0.0673107	1	1	1	P09233; P30792; Q7SIC9;
4 iron, 4 sulfur cluster binding	4	880	1.5444	0.733435	0.79845	1	1	1	O23813; P04966; P04967; P11601;
kinase activity	1	145	0.3861	1.12106	0.595546	1	1	1	P11155;
alcohol dehydrogenase (NAD) activity	3	36	1.1583	13.4539	0.00145434	1	0.199245	1	P00333; P04707; P93629;
transferase activity	1	246	0.3861	0.660806	0.785108	1	1	1	P80608;
transcription regulatory region DNA binding	1	249	0.3861	0.652844	0.789112	1	1	1	P27347;
sequence-specific DNA binding	1	722	0.3861	0.225156	0.989316	1	1	1	Q9FYS5;
auxin binding	1	16	0.3861	10.154	0.094919	1	1	1	P13689;
receptor activity	1	35	0.3861	4.64338	0.196044	1	1	1	P13689;
actin binding	3	270	1.1583	1.79429	0.23628	1	1	1	A4KA61; A4KA58; Q41764;
flavin adenine dinucleotide binding	2	207	0.772201	1.56282	0.368781	1	1	1	Q41768; Q41769;
cobalt ion binding	1	45	0.3861	3.61175	0.244663	1	1	1	Q7SIC9;
structural constituent of cytoskeleton	9	134	3.4749	10.8216	1.7807e-07	0.000487913	0.000162638	0.00104626	P14641; P18025; P22275; Q02245; Q41782; Q41783; Q41784; Q43695; Q43697;
mRNA binding	4	282	1.5444	2.28868	0.0998494	1	1	1	Q8RXK6; Q8W4R3; Q94A52; Q9FJR0;
cysteine-type peptidase activity	2	60	0.772201	5.3911	0.0537799	1	1	1	Q10716; Q10717;
S-(hydroxymethyl)glutathione dehydrogenase activity	1	5	0.3861	32.4481	0.0306812	1	1	1	P93629;
photoreceptor activity	1	48	0.3861	3.38606	0.258669	1	1	1	P19862;
polygalacturonase activity	2	31	0.772201	10.4328	0.0158794	1	0.805734	1	P26216; P35339;
chitin binding	1	112	0.3861	1.45134	0.50288	1	1	1	P29022;
chitinase activity	1	104	0.3861	1.56297	0.477399	1	1	1	P29022;
peroxidase activity	1	232	0.3861	0.70068	0.765399	1	1	1	A5H453;
protein heterodimerization activity	4	272	1.5444	2.37282	0.0904304	1	1	1	P30756; P40280; Q41811; P69246;
nucleic acid binding	2	134	0.772201	2.41415	0.202641	1	1	1	Q9M4U4; Q9M4U5;
RNA binding	9	1973	3.4749	0.735022	0.868062	1	1	1	B2LXS7; Q9LZQ9; P10979; P93008; Q9LFN6; Q6JB11; Q84W89; Q8H136; Q9SYP1;
chromatin binding	1	105	0.3861	1.54809	0.480654	1	1	1	Q9AXT8;
alanine-glyoxylate transaminase activity	1	8	0.3861	20.2952	0.048638	1	1	1	P84187;
phosphorelay sensor kinase activity	1	83	0.3861	1.95838	0.404153	1	1	1	P19862;
phosphoprotein phosphatase activity	1	80	0.3861	2.03181	0.392886	1	1	1	P22198;
double-stranded DNA binding	1	59	0.3861	2.75487	0.307847	1	1	1	O23813;
histone binding	1	70	0.3861	2.32202	0.353774	1	1	1	F4IHS2;
aspartate kinase activity	2	8	0.772201	40.3895	0.00105033	1	0.159884	1	P49079; P49080;
homoserine dehydrogenase activity	2	5	0.772201	64.5748	0.000379773	1	0.0650361	0.418383	P49079; P49080;
NADP binding	6	141	2.3166	6.86009	0.000264095	0.72362	0.0489139	0.314667	P08735; P09315; P49079; P49080; Q09054; Q43247;
aldehyde dehydrogenase (NAD) activity	2	14	0.772201	23.0921	0.00333061	1	0.365035	1	Q56YU0; Q9SU63;
coniferyl-aldehyde dehydrogenase activity	1	1	0.3861	160.955	0.00621267	1	0.395877	1	Q56YU0;
2 iron, 2 sulfur cluster binding	3	212	1.1583	2.28515	0.145934	1	1	1	B6TB21; P27787; P49727;
electron transfer activity	3	716	1.1583	0.676632	0.823844	1	1	1	P11601; P27787; P46617;
fructose-bisphosphate aldolase activity	1	22	0.3861	7.38595	0.128152	1	1	1	P08440;
quinone binding	1	1279	0.3861	0.127102	0.999695	1	1	1	P19124;
monooxygenase activity	3	855	1.1583	0.566631	0.902353	1	1	1	P00874; P05348; P93703;
oxidoreductase activity, acting on paired donors, with incorporation or reduction of molecular oxygen	1	164	0.3861	0.991188	0.640868	1	1	1	P93703;
amylopectin maltohydrolase activity	1	19	0.3861	8.55154	0.11169	1	1	1	P55005;
beta-amylase activity	1	20	0.3861	8.12418	0.117211	1	1	1	P55005;
oxidoreductase activity, acting on paired donors, with incorporation or reduction of molecular oxygen, 2-oxoglutarate as one donor, and incorporation of one atom each of oxygen into both donors	1	4	0.3861	40.5398	0.0246209	1	1	1	Q84TC2;
protein disulfide isomerase activity	1	51	0.3861	3.18692	0.272416	1	1	1	P52588;
glucose-1-phosphate adenylyltransferase activity	1	34	0.3861	4.77991	0.191014	1	1	1	P55234;
GTPase activity	13	455	5.01931	4.60216	6.49132e-06	0.0177862	0.00296437	0.0190701	P14641; P18025; P22275; Q02245; P49104; Q05737; Q41782; Q41783; Q41784; Q41803; Q41874; Q43695; Q43697;
GTP binding	16	597	6.17761	4.31633	1.27732e-06	0.00349985	0.000874962	0.00562871	O24578; P14641; P18025; P22275; Q02245; P49076; P49104; P55876; Q05737; Q41782; Q41783; Q41784; Q41803; Q41874; Q43695; Q43697;
acetyl-CoA:L-glutamate N-acetyltransferase activity	1	15	0.3861	10.8304	0.0892588	1	1	1	C0PF72;
glutamate N-acetyltransferase activity	1	13	0.3861	12.4954	0.0778324	1	1	1	C0PF72;
methione N-acyltransferase activity	1	15	0.3861	10.8304	0.0892588	1	1	1	C0PF72;
acetylserotonin O-methyltransferase activity	1	6	0.3861	27.049	0.036704	1	1	1	Q06509;
proton-transporting ATP synthase activity, rotational mechanism	6	533	2.3166	1.81486	0.116534	1	1	1	P00827; P00835; P05022; P05494; P0C1M0; P19023;
hydrogen ion transmembrane transporter activity	1	440	0.3861	0.369457	0.936498	1	1	1	P48186;
structural constituent of ribosome	20	3667	7.72201	0.878294	0.76048	1	1	1	O22424; O24413; O24415; O24573; O48557; O48558; P08529; P19950; P19951; P25460; P27923; P45633; P46252; P51421; P51425; P52855; Q05761; Q08066; Q08068; Q08069;
chaperone binding	1	21	0.3861	7.73749	0.122698	1	1	1	P05494;
beta-glucosidase activity	1	108	0.3861	1.50509	0.490298	1	1	1	P49235;
inorganic diphosphatase activity	1	24	0.3861	6.77071	0.138957	1	1	1	O48556;
cysteine-type endopeptidase inhibitor activity	1	44	0.3861	3.69381	0.239936	1	1	1	P31726;
cinnamyl-alcohol dehydrogenase activity	1	42	0.3861	3.86967	0.230393	1	1	1	O24562;
sinapyl alcohol dehydrogenase activity	1	42	0.3861	3.86967	0.230393	1	1	1	O24562;
scopolin beta-glucosidase activity	1	87	0.3861	1.86835	0.418852	1	1	1	P49235;
fucosidase activity	1	2	0.3861	80.878	0.0123869	1	0.665492	1	P49235;
unfolded protein binding	2	117	0.772201	2.76489	0.164762	1	1	1	Q08277; Q9SP22;
rRNA binding	3	2319	1.1583	0.208915	0.999953	1	1	1	O22424; P08529; P25460;
single-stranded DNA binding	1	62	0.3861	2.62159	0.320685	1	1	1	B2LXS7;
helicase activity	6	89	2.3166	10.8678	2.04848e-05	0.0561285	0.00801835	0.0515828	F4IHS2; Q41741; Q9LFN6; Q9FJR0; Q9SX04; Q9SYP1;
DIMBOA-glucoside oxygenase activity	1	1	0.3861	160.955	0.00621267	1	0.395877	1	Q84TC2;
TRIBOA-glucoside methyltransferase activity	1	1	0.3861	160.955	0.00621267	1	0.395877	1	B1P123;
2,4-dihydroxy-7-methoxy-2H-1,4-benzoxazin-3(4H)-one 2-D-glucosyltransferase activity	2	2	0.772201	160.955	3.84492e-05	0.105351	0.0117056	0.0753034	B4G072; Q8W2B7;
ATP-dependent RNA helicase activity	7	143	2.7027	7.88963	3.357e-05	0.0919819	0.0114977	0.073966	Q9LZQ9; P93008; Q84W89; Q8H136; Q8RXK6; Q8W4R3; Q94A52;
3-hydroxyindolin-2-one monooxygenase activity	1	1	0.3861	160.955	0.00621267	1	0.395877	1	Q43250;
ferric iron binding	2	21	0.772201	15.3984	0.00746923	1	0.454793	1	P29036; P29390;
chlorophyll binding	9	911	3.4749	1.59187	0.116663	1	1	1	P04966; P04967; P05641; P06671; P12329; P27497; P48183; P48184; P48187;
caffeoyl-CoA O-methyltransferase activity	1	29	0.3861	5.60375	0.16539	1	1	1	Q9XGD6;
phosphoenolpyruvate carboxylase activity	2	27	0.772201	11.9778	0.0121828	1	0.665492	1	P04711; P51059;
cysteine synthase activity	1	27	0.3861	6.01869	0.154915	1	1	1	P80608;
catalase activity	2	41	0.772201	7.88881	0.0268914	1	1	1	P18122; P18123;
cyclin-dependent protein serine/threonine kinase activity	1	52	0.3861	3.12564	0.276942	1	1	1	P23111;
RNA polymerase II carboxy-terminal domain kinase activity	1	43	0.3861	3.7797	0.235179	1	1	1	P23111;
protein disulfide oxidoreductase activity	1	153	0.3861	1.06245	0.615285	1	1	1	Q41864;
chalcone isomerase activity	1	50	0.3861	3.25065	0.267862	1	1	1	Q08704;
sucrose alpha-glucosidase activity	1	44	0.3861	3.69381	0.239936	1	1	1	P49174;
ATP-dependent peptidase activity	1	42	0.3861	3.86967	0.230393	1	1	1	P93648;
DNA (cytosine-5-)-methyltransferase activity	1	19	0.3861	8.55154	0.11169	1	1	1	Q9AXT8;
caffeate O-methyltransferase activity	1	22	0.3861	7.38595	0.128152	1	1	1	Q06509;
luteolin O-methyltransferase activity	1	3	0.3861	54.0082	0.0185229	1	0.890399	1	Q06509;
cytochrome-c oxidase activity	1	52	0.3861	3.12564	0.276942	1	1	1	P00412;
peptidyl-prolyl cis-trans isomerase activity	2	74	0.772201	4.3713	0.0776176	1	1	1	P21569; Q10724;
cyclosporin A binding	2	4	0.772201	80.6783	0.000228803	0.62692	0.0482246	0.310234	P21569; Q10724;
tRNA binding	2	35	0.772201	9.24079	0.0199919	1	0.944447	1	B6SHG7; Q9XIK4;
electron transporter, transferring electrons within cytochrome b6/f complex of photosystem II activity	1	226	0.3861	0.719281	0.75641	1	1	1	P05642;
ubiquinol-cytochrome-c reductase activity	1	27	0.3861	6.01869	0.154915	1	1	1	P49727;
cyanate hydratase activity	1	13	0.3861	12.4954	0.0778324	1	1	1	B6TTW1;
NADPH binding	1	13	0.3861	12.4954	0.0778324	1	1	1	P52580;
glutathione transferase activity	1	97	0.3861	1.67575	0.454039	1	1	1	P04907;
dihydrofolate reductase activity	1	6	0.3861	27.049	0.036704	1	1	1	O81395;
thymidylate synthase activity	1	6	0.3861	27.049	0.036704	1	1	1	O81395;
translation elongation factor activity	2	147	0.772201	2.20067	0.232213	1	1	1	P80639; Q41803;
translation initiation factor activity	6	210	2.3166	4.60617	0.00209692	1	0.261162	1	O81482; P55876; P56330; P80639; Q41741; Q9XHR2;
ribosome binding	1	44	0.3861	3.69381	0.239936	1	1	1	P80639;
phosphopyruvate hydratase activity	2	15	0.772201	21.5536	0.00382731	1	0.395877	1	P26301; P42895;
electron transporter, transferring electrons within the cyclic electron transport pathway of photosynthesis activity	5	632	1.9305	1.27591	0.35662	1	1	1	P05641; P05643; P48183; P48184; P48187;
ferroxidase activity	2	20	0.772201	16.1679	0.00678551	1	0.422552	1	P29036; P29390;
glyceraldehyde-3-phosphate dehydrogenase (NAD+) (phosphorylating) activity	3	37	1.1583	13.0904	0.00157545	1	0.205558	1	P08735; Q09054; Q43247;
glyceraldehyde-3-phosphate dehydrogenase (NADP+) (phosphorylating) activity	1	16	0.3861	10.154	0.094919	1	1	1	P09315;
NAD+ binding	3	14	1.1583	34.5807	8.2016e-05	0.224724	0.0204294	0.131425	P08735; Q09054; Q43247;
phosphate ion binding	4	90	1.5444	7.17065	0.0024477	1	0.291595	1	P08735; P24993; Q09054; Q43247;
1,4-alpha-glucan branching enzyme activity	1	8	0.3861	20.2952	0.048638	1	1	1	Q08047;
1,4-alpha-glucan branching enzyme activity (using a glucosylated glycogenin as primer for glycogen synthesis)	1	8	0.3861	20.2952	0.048638	1	1	1	Q08047;
cation binding	1	11	0.3861	14.7652	0.0662633	1	1	1	Q08047;
glutamate-ammonia ligase activity	4	50	1.5444	12.906	0.000267777	0.733708	0.0489139	0.314667	P38559; P38560; P38561; P38563;
3 iron, 4 sulfur cluster binding	1	25	0.3861	6.49999	0.144309	1	1	1	P23225;
glutamate synthase (ferredoxin) activity	1	10	0.3861	16.2402	0.0604246	1	1	1	P23225;
phosphoglycerate mutase activity	1	9	0.3861	18.0427	0.0545496	1	1	1	P30792;
thiamine pyrophosphate binding	4	35	1.5444	18.4356	6.54948e-05	0.179456	0.0179456	0.115445	P28516; Q05327; Q41768; Q41769;
cellulose 1,4-beta-cellobiosidase activity	1	1	0.3861	160.955	0.00621267	1	0.395877	1	P49235;
DIMBOA glucoside beta-D-glucosidase activity	1	7	0.3861	23.1904	0.0426895	1	1	1	P49235;
galactosidase activity	1	1	0.3861	160.955	0.00621267	1	0.395877	1	P49235;
mannosidase activity	1	1	0.3861	160.955	0.00621267	1	0.395877	1	P49235;
xylanase activity	1	1	0.3861	160.955	0.00621267	1	0.395877	1	P49235;
betaine-homocysteine S-methyltransferase activity	1	9	0.3861	18.0427	0.0545496	1	1	1	Q9FUM8;
fructokinase activity	2	30	0.772201	10.7804	0.0149154	1	0.771098	1	Q6XZ78; Q6XZ79;
acetolactate synthase activity	2	23	0.772201	14.06	0.00892555	1	0.531652	1	Q41768; Q41769;
inositol-3-phosphate synthase activity	1	16	0.3861	10.154	0.094919	1	1	1	Q9FPK7;
inositol-1,3,4-trisphosphate 6-kinase activity	1	18	0.3861	9.02636	0.106134	1	1	1	Q84Y01;
inositol tetrakisphosphate 1-kinase activity	1	17	0.3861	9.55701	0.100544	1	1	1	Q84Y01;
inositol-1,3,4-trisphosphate 5-kinase activity	1	17	0.3861	9.55701	0.100544	1	1	1	Q84Y01;
inositol tetrakisphosphate 6-kinase activity	1	1	0.3861	160.955	0.00621267	1	0.395877	1	Q84Y01;
inositol-1,3,4,5-tetrakisphosphate 3-phosphatase activity	1	1	0.3861	160.955	0.00621267	1	0.395877	1	Q84Y01;
adenylate kinase activity	1	18	0.3861	9.02636	0.106134	1	1	1	P43188;
L-lactate dehydrogenase activity	1	4	0.3861	40.5398	0.0246209	1	1	1	P29038;
1-acylglycerol-3-phosphate O-acyltransferase activity	1	15	0.3861	10.8304	0.0892588	1	1	1	Q41745;
malate dehydrogenase (decarboxylating) (NAD+) activity	1	18	0.3861	9.02636	0.106134	1	1	1	P16243;
malate dehydrogenase (decarboxylating) (NADP+) activity	1	14	0.3861	11.6035	0.0835633	1	1	1	P16243;
oxaloacetate decarboxylase activity	1	17	0.3861	9.55701	0.100544	1	1	1	P16243;
malate synthase activity	1	10	0.3861	16.2402	0.0604246	1	1	1	P49081;
L-malate dehydrogenase activity	1	31	0.3861	5.24233	0.175735	1	1	1	Q08062;
malate dehydrogenase (NADP+) activity	1	9	0.3861	18.0427	0.0545496	1	1	1	P15719;
NAD(P)+ transhydrogenase activity	1	3	0.3861	54.0082	0.0185229	1	0.890399	1	P15719;
methionine S-methyltransferase activity	1	4	0.3861	40.5398	0.0246209	1	1	1	Q8W519;
acireductone synthase activity	1	10	0.3861	16.2402	0.0604246	1	1	1	B4G0F3;
methylthioribulose 1-phosphate dehydratase activity	1	10	0.3861	16.2402	0.0604246	1	1	1	B4G0F3;
methylenetetrahydrofolate reductase (NAD(P)H) activity	1	4	0.3861	40.5398	0.0246209	1	1	1	Q9SE94;
S-methyl-5-thioribose-1-phosphate isomerase activity	1	11	0.3861	14.7652	0.0662633	1	1	1	B6TZD1;
NADH dehydrogenase (ubiquinone) activity	1	1077	0.3861	0.150941	0.998887	1	1	1	P19124;
superoxide dismutase activity	3	72	1.1583	6.72789	0.0103138	1	0.601271	1	P09233; P23345; P41980;
water channel activity	3	78	1.1583	6.21042	0.0128044	1	0.674692	1	O64964; Q84RL7; Q9ATM8;
DNA-directed 5'-3' RNA polymerase activity	1	592	0.3861	0.274598	0.975665	1	1	1	P10581;
rRNA cytidine N-acetyltransferase activity	1	2	0.3861	80.878	0.0123869	1	0.665492	1	Q9XIK4;
tRNA N-acetyltransferase activity	1	2	0.3861	80.878	0.0123869	1	0.665492	1	Q9XIK4;
porin activity	1	36	0.3861	4.51443	0.201043	1	1	1	P42057;
voltage-gated anion channel activity	1	22	0.3861	7.38595	0.128152	1	1	1	P42057;
phosphatidylinositol-4,5-bisphosphate binding	2	9	0.772201	35.9068	0.00134489	1	0.193948	1	Q9FR39; P35081;
phenylalanine ammonia-lyase activity	1	51	0.3861	3.18692	0.272416	1	1	1	Q8VXG7;
tyrosine ammonia-lyase activity	1	1	0.3861	160.955	0.00621267	1	0.395877	1	Q8VXG7;
N1-acetylspermidine:oxygen oxidoreductase (propane-1,3-diamine-forming) activity	1	1	0.3861	160.955	0.00621267	1	0.395877	1	O64411;
N1-acetylspermine:oxygen oxidoreductase (propane-1,3-diamine-forming) activity	1	1	0.3861	160.955	0.00621267	1	0.395877	1	O64411;
N8-acetylspermidine:oxygen oxidoreductase (propane-1,3-diamine-forming) activity	1	1	0.3861	160.955	0.00621267	1	0.395877	1	O64411;
spermidine oxidase (propane-1,3-diamine-forming) activity	1	1	0.3861	160.955	0.00621267	1	0.395877	1	O64411;
spermine oxidase (propane-1,3-diamine-forming) activity	1	1	0.3861	160.955	0.00621267	1	0.395877	1	O64411;
NAD+ ADP-ribosyltransferase activity	1	17	0.3861	9.55701	0.100544	1	1	1	Q9ZSV1;
phosphoenolpyruvate carboxykinase (ATP) activity	1	5	0.3861	32.4481	0.0306812	1	1	1	Q9SLZ0;
DNA polymerase processivity factor activity	1	12	0.3861	13.5358	0.0720658	1	1	1	Q43266;
pyruvate decarboxylase activity	2	17	0.772201	19.0194	0.00491689	1	0.395877	1	P28516; Q05327;
phosphotransferase activity, phosphate group as acceptor	1	5	0.3861	32.4481	0.0306812	1	1	1	Q195N6;
galacturan 1,4-alpha-galacturonidase activity	2	8	0.772201	40.3895	0.00105033	1	0.159884	1	P26216; P35339;
phosphoglucomutase activity	2	13	0.772201	24.867	0.00286653	1	0.327262	1	P93804; P93805;
actin monomer binding	4	18	1.5444	35.8373	4.15909e-06	0.0113959	0.00227918	0.0146622	Q9FR39; P35081; P35082; P35083;
N-acylphosphatidylethanolamine-specific phospholipase D activity	1	24	0.3861	6.77071	0.138957	1	1	1	Q43270;
phospholipase D activity	1	24	0.3861	6.77071	0.138957	1	1	1	Q43270;
pyruvate, phosphate dikinase activity	1	10	0.3861	16.2402	0.0604246	1	1	1	P11155;
proline-rich region binding	4	5	1.5444	128.828	7.24283e-09	1.98454e-05	9.92268e-06	6.38335e-05	Q9FR39; P35081; P35082; P35083;
adenylosuccinate synthase activity	1	22	0.3861	7.38595	0.128152	1	1	1	O24578;
ribulose-bisphosphate carboxylase activity	2	680	0.772201	0.475758	0.925799	1	1	1	P00874; P05348;
UDP-arabinopyranose mutase activity	1	11	0.3861	14.7652	0.0662633	1	1	1	P80607;
serine-glyoxylate transaminase activity	1	3	0.3861	54.0082	0.0185229	1	0.890399	1	P84187;
sulfite reductase (ferredoxin) activity	1	5	0.3861	32.4481	0.0306812	1	1	1	O23813;
sucrose-phosphate phosphatase activity	1	11	0.3861	14.7652	0.0662633	1	1	1	Q9FQ11;
sucrose synthase activity	2	49	0.772201	6.6011	0.0373428	1	1	1	P04712; P49036;
ADP-glucose-starch glucosyltransferase activity	1	17	0.3861	9.55701	0.100544	1	1	1	P04713;
glycogen (starch) synthase activity	1	30	0.3861	5.41702	0.170578	1	1	1	P04713;
proton motive force dependent protein transmembrane transporter activity	1	9	0.3861	18.0427	0.0545496	1	1	1	O48950;
transketolase activity	1	9	0.3861	18.0427	0.0545496	1	1	1	Q7SIC9;
triose-phosphate isomerase activity	1	17	0.3861	9.55701	0.100544	1	1	1	P12863;
tRNA (guanine-N7-)-methyltransferase activity	1	4	0.3861	40.5398	0.0246209	1	1	1	B6SHG7;
anthocyanidin 3-O-glucosyltransferase activity	1	18	0.3861	9.02636	0.106134	1	1	1	P16166;
proton-transporting ATPase activity, rotational mechanism	1	40	0.3861	4.0631	0.220731	1	1	1	P49087;

## Sheet: Biological process
Analysis: Biological process
Dataset name: AC
Number of proteins in the dataset: 259
Number of proteins in the dataset (which are available in Biological process database) :204
Number of proteins in background: 41689
Is analysis quantitative: No
						Corrected p-values
Biological process	No. of genes in the dataset	No.of genes in the background dataset	Percentage of proteins	Fold enrichment	P-value (Hypergeometric test)	Bonferroni method	BH method	Q-value (Storey-Tibshirani method)
auxin-activated signaling pathway	1	328	0.3861	0.495609	0.871548	1	1	1	P13689;
response to abscisic acid	3	389	1.1583	1.24541	0.435496	1	1	1	P18122; P41980; Q9ZSV1;
negative regulation of protein serine/threonine kinase activity	2	3	0.772201	107.482	0.000114873	0.415957	0.0277304	0.181731	P49106; Q01526;
regulation of gene expression	4	113	1.5444	5.71127	0.00552165	1	0.793143	1	P49106; Q01526; Q9LFN6; Q94A52;
cold acclimation	2	53	0.772201	6.103	0.0430597	1	1	1	P18122; P18123;
ethylene-activated signaling pathway	1	195	0.3861	0.833623	0.704207	1	1	1	F4IHS2;
response to cadmium ion	1	309	0.3861	0.526083	0.855268	1	1	1	Q9SU63;
defense response to bacterium	1	377	0.3861	0.431195	0.905596	1	1	1	Q9FJR0;
biosynthetic process	1	81	0.3861	2.00672	0.396665	1	1	1	Q8W519;
cellular response to iron ion	1	53	0.3861	3.06668	0.28144	1	1	1	B6TZD1;
cell division	1	328	0.3861	0.495609	0.871548	1	1	1	P23111;
response to cytokinin	1	193	0.3861	0.842261	0.70048	1	1	1	P04711;
defense response	3	1188	1.1583	0.407804	0.979366	1	1	1	B2LXS7; F4IHS2; P29022;
response to auxin	2	233	0.772201	1.38844	0.425367	1	1	1	P18122; P18123;
response to oxidative stress	5	334	1.9305	2.41426	0.0583451	1	1	1	A5H453; P09233; P18122; P18123; Q9ZSV1;
response to wounding	2	234	0.772201	1.3825	0.427492	1	1	1	F4IHS2; Q9FJR0;
regulation of translation	4	114	1.5444	5.66117	0.00569503	1	0.793143	1	O81482; P56330; Q8RXK6; Q94A52;
flower development	1	270	0.3861	0.602069	0.815134	1	1	1	F4IHS2;
transcription, DNA-templated	8	3302	3.0888	0.390444	0.999638	1	1	1	F4IHS2; P10581; P19862; Q8H6B1; Q9AXT8; Q9LEF5; Q9M4U4; Q9M4U5;
carbohydrate metabolic process	7	454	2.7027	2.48518	0.0241307	1	1	1	P15719; P26216; P29038; P35339; P49174; P49235; Q08062;
methionine metabolic process	1	23	0.3861	7.06496	0.133571	1	1	1	Q9SE94;
multicellular organism development	1	469	0.3861	0.346613	0.947103	1	1	1	A1Y2B7;
response to salt stress	1	465	0.3861	0.349594	0.945753	1	1	1	B6TTW1;
defense response to fungus	1	670	0.3861	0.24263	0.985145	1	1	1	P33679;
killing of cells of other organism	1	482	0.3861	0.337264	0.951265	1	1	1	P33679;
anthocyanin-containing compound biosynthetic process	1	73	0.3861	2.22661	0.365764	1	1	1	P16166;
phenylpropanoid biosynthetic process	2	15	0.772201	21.5536	0.00382731	1	0.629941	1	Q56YU0; Q8VXG7;
metabolic process	2	331	0.772201	0.977372	0.611013	1	1	1	B4G072; Q8W2B7;
viral process	1	48	0.3861	3.38606	0.258669	1	1	1	Q8RXK6;
tetrahydrofolate interconversion	1	22	0.3861	7.38595	0.128152	1	1	1	Q9SE94;
transport	1	1057	0.3861	0.153797	0.998735	1	1	1	P19124;
flavonoid biosynthetic process	1	253	0.3861	0.642523	0.794335	1	1	1	Q08704;
pentose-phosphate shunt	1	33	0.3861	4.92471	0.185953	1	1	1	P12863;
mRNA transport	2	50	0.772201	6.46911	0.0387427	1	1	1	Q8RXK6; Q94A52;
protein transport	3	476	1.1583	1.01778	0.569083	1	1	1	P49076; P49104; Q05737;
protein homotetramerization	5	20	1.9305	40.2991	1.2792e-07	0.000463199	9.26398e-05	0.000607114	P09233; P18122; P18123; Q84RL7; Q9XF59;
tricarboxylic acid cycle	4	159	1.5444	4.05906	0.0176492	1	1	1	P04711; P49081; P51059; Q08062;
transmembrane transport	1	87	0.3861	1.86835	0.418852	1	1	1	P04709;
lipid catabolic process	1	225	0.3861	0.722478	0.754879	1	1	1	Q43270;
photosynthetic electron transport chain	2	354	0.772201	0.913872	0.647411	1	1	1	P05643; P69388;
protein stabilization	1	105	0.3861	1.54809	0.480654	1	1	1	P24993;
circadian rhythm	1	91	0.3861	1.78623	0.43319	1	1	1	P18123;
cellular iron ion homeostasis	2	22	0.772201	14.6988	0.00818271	1	1	1	P29036; P29390;
response to reactive oxygen species	3	43	1.1583	11.2642	0.00243463	1	0.440944	1	P09233; P18122; P18123;
response to gibberellin	1	92	0.3861	1.76682	0.436719	1	1	1	Q8VXG7;
response to heat	2	185	0.772201	1.74866	0.319277	1	1	1	P49727; Q43247;
iron-sulfur cluster assembly	1	58	0.3861	2.80236	0.303514	1	1	1	B6TB21;
seed development	1	81	0.3861	2.00672	0.396665	1	1	1	Q84Y01;
sugar mediated signaling pathway	1	30	0.3861	5.41702	0.170578	1	1	1	Q9FJR0;
response to osmotic stress	1	137	0.3861	1.18652	0.574798	1	1	1	P41980;
regulation of transcription, DNA-templated	10	1761	3.861	0.914908	0.658268	1	1	1	B2LXS7; F4IHS2; P19862; P27347; Q8H6B1; Q9AXT8; Q9FYS5; Q9LEF5; Q9M4U4; Q9M4U5;
unidimensional cell growth	1	86	0.3861	1.89007	0.415212	1	1	1	O64964;
actin filament depolymerization	1	35	0.3861	4.64338	0.196044	1	1	1	Q41764;
response to hypoxia	1	35	0.3861	4.64338	0.196044	1	1	1	Q94A52;
response to light stimulus	3	192	1.1583	2.52318	0.118012	1	1	1	P08735; P09315; P27787;
cellular response to nitric oxide	1	24	0.3861	6.77071	0.138957	1	1	1	B6TZD1;
regulation of defense response to fungus	1	24	0.3861	6.77071	0.138957	1	1	1	F4IHS2;
glyoxylate cycle	1	43	0.3861	3.7797	0.235179	1	1	1	P49081;
regulation of stomatal closure	1	18	0.3861	9.02636	0.106134	1	1	1	B6TVL4;
photosynthesis	10	2977	3.861	0.541201	0.990544	1	1	1	O65107; P04711; P04966; P04967; P05642; P11155; P24993; P46617; P51059; Q41048;
glutamine metabolic process	1	53	0.3861	3.06668	0.28144	1	1	1	P23225;
tetrahydrofolate biosynthetic process	1	21	0.3861	7.73749	0.122698	1	1	1	O81395;
ethanol oxidation	1	5	0.3861	32.4481	0.0306812	1	1	1	P93629;
protein-chromophore linkage	10	1046	3.861	1.54029	0.119076	1	1	1	P04966; P04967; P05641; P06671; P12329; P19862; P27497; P48183; P48184; P48187;
mRNA processing	5	932	1.9305	0.865211	0.689577	1	1	1	Q9LZQ9; P93008; Q8RXK6; Q94A52; Q9SYP1;
red, far-red light phototransduction	1	105	0.3861	1.54809	0.480654	1	1	1	P19862;
cell wall organization	7	543	2.7027	2.07786	0.0541973	1	1	1	P0C1Y5; P26216; P35339; P58738; P80607; Q07154; Q1ZYQ8;
vesicle-mediated transport	1	124	0.3861	1.3109	0.538798	1	1	1	P49076;
cell wall macromolecule catabolic process	1	76	0.3861	2.13873	0.377532	1	1	1	P29022;
chitin catabolic process	1	106	0.3861	1.53349	0.483889	1	1	1	P29022;
polysaccharide catabolic process	2	118	0.772201	2.74146	0.166955	1	1	1	P29022; P55005;
vegetative to reproductive phase transition of meristem	1	89	0.3861	1.82637	0.426066	1	1	1	Q9SYP1;
negative regulation of transcription, DNA-templated	1	137	0.3861	1.18652	0.574798	1	1	1	O23813;
glucose metabolic process	6	78	2.3166	12.4002	9.58516e-06	0.0347079	0.00385643	0.0252731	P08735; P09315; P93804; P93805; Q09054; Q43247;
DNA repair	4	195	1.5444	3.30973	0.0339135	1	1	1	B2LXS7; Q8H6B1; Q9LEF5; Q9ZSV1;
gene silencing by RNA	1	64	0.3861	2.53968	0.329112	1	1	1	A1Y2B7;
photorespiration	2	672	0.772201	0.481421	0.922699	1	1	1	P00874; P05348;
seed maturation	1	29	0.3861	5.60375	0.16539	1	1	1	P04712;
cytokinin-activated signaling pathway	1	133	0.3861	1.2222	0.56403	1	1	1	P49235;
cell cycle	2	296	0.772201	1.09294	0.550286	1	1	1	P23111; Q9SX04;
lysine biosynthetic process via diaminopimelate	2	29	0.772201	11.152	0.0139777	1	1	1	P49079; P49080;
threonine biosynthetic process	2	12	0.772201	26.9376	0.00243548	1	0.440944	1	P49079; P49080;
methionine biosynthetic process	3	26	1.1583	18.6265	0.000554406	1	0.118088	0.773892	P49079; P49080; Q9FUM8;
protein import into chloroplast thylakoid membrane	1	13	0.3861	12.4954	0.0778324	1	1	1	O48950;
glycolytic process	8	203	3.0888	6.35068	4.37099e-05	0.158273	0.0121749	0.079788	P08440; P08735; P12863; P26301; P30792; P42895; Q09054; Q43247;
gluconeogenesis	2	60	0.772201	5.3911	0.0537799	1	1	1	P12863; Q9SLZ0;
covalent chromatin modification	3	132	1.1583	3.66999	0.0495296	1	1	1	Q9AXT8; Q9M4U4; Q9M4U5;
response to anoxia	5	10	1.9305	80.558	2.18765e-09	7.92149e-06	7.92149e-06	5.19134e-05	O24413; O24573; P04712; P08440; Q43247;
sucrose biosynthetic process	2	39	0.772201	8.29326	0.0244978	1	1	1	P08440; Q9FQ11;
leaf development	1	123	0.3861	1.32156	0.535907	1	1	1	O64964;
vacuole organization	1	23	0.3861	7.06496	0.133571	1	1	1	O64964;
nucleosome assembly	2	90	0.772201	3.59427	0.108043	1	1	1	P23444; Q9FYS5;
response to nitrate	1	21	0.3861	7.73749	0.122698	1	1	1	P04711;
jasmonic acid mediated signaling pathway	1	48	0.3861	3.38606	0.258669	1	1	1	Q9FJR0;
cell redox homeostasis	2	288	0.772201	1.12329	0.535506	1	1	1	P52588; Q41864;
protein folding	4	167	1.5444	3.86462	0.020716	1	1	1	P21569; P29185; Q08277; Q9SP22;
glycogen biosynthetic process	1	34	0.3861	4.77991	0.191014	1	1	1	P55234;
hydrogen peroxide catabolic process	3	225	1.1583	2.15313	0.165129	1	1	1	A5H453; P18122; P18123;
small GTPase mediated signal transduction	1	51	0.3861	3.18692	0.272416	1	1	1	P49076;
protein ADP-ribosylation	1	12	0.3861	13.5358	0.0720658	1	1	1	Q9ZSV1;
response to stress	1	66	0.3861	2.46273	0.337435	1	1	1	Q08277;
arginine biosynthetic process	1	37	0.3861	4.39246	0.206011	1	1	1	C0PF72;
cellular response to ethylene stimulus	1	30	0.3861	5.41702	0.170578	1	1	1	B6TZD1;
response to herbicide	5	180	1.9305	4.47967	0.00549703	1	0.793143	1	P04907; P09233; P48183; Q41768; Q41769;
sucrose metabolic process	2	66	0.772201	4.90108	0.063632	1	1	1	P04712; P49036;
regulation of gene expression, epigenetic	1	11	0.3861	14.7652	0.0662633	1	1	1	F4IHS2;
melatonin biosynthetic process	1	10	0.3861	16.2402	0.0604246	1	1	1	Q06509;
lignin biosynthetic process	3	120	1.1583	4.03696	0.0391588	1	1	1	O24562; Q06509; Q9XGD6;
de-etiolation	1	15	0.3861	10.8304	0.0892588	1	1	1	B6TVL4;
translation	15	3603	5.79151	0.670533	0.966056	1	1	1	O22424; O48557; O48558; P08529; P19950; P19951; P25460; P27923; P45633; P51421; P51425; Q05761; Q08066; Q08068; Q08069;
one-carbon metabolic process	1	126	0.3861	1.29009	0.544528	1	1	1	O81395;
protein arginylation	1	3	0.3861	54.0082	0.0185229	1	1	1	Q8VXG7;
cellular response to DNA damage stimulus	1	48	0.3861	3.38606	0.258669	1	1	1	Q9LFN6;
mRNA splicing, via spliceosome	1	96	0.3861	1.69321	0.450618	1	1	1	Q9LFN6;
ATP synthesis coupled proton transport	7	964	2.7027	1.17042	0.391887	1	1	1	P00827; P00835; P05022; P05494; P0C1M0; P19023; P48186;
ATP hydrolysis coupled proton transport	1	224	0.3861	0.725703	0.753338	1	1	1	P49087;
photosynthetic electron transport in photosystem I	1	140	0.3861	1.16109	0.5827	1	1	1	P11601;
photosynthetic electron transport in photosystem II	4	545	1.5444	1.18425	0.43937	1	1	1	P05641; P48183; P48184; P48187;
regulation of DNA replication	2	18	0.772201	17.9634	0.00550894	1	0.793143	1	O23813; Q43266;
microtubule nucleation	1	14	0.3861	11.6035	0.0835633	1	1	1	Q41874;
isoleucine biosynthetic process	2	40	0.772201	8.08598	0.0256831	1	1	1	Q41768; Q41769;
valine biosynthetic process	2	35	0.772201	9.24079	0.0199919	1	1	1	Q41768; Q41769;
cytoplasmic mRNA processing body assembly	1	12	0.3861	13.5358	0.0720658	1	1	1	Q8RXK6;
DNA replication	3	103	1.1583	4.70319	0.0266027	1	1	1	Q43266; Q8H6B1; Q9LEF5;
ATP-dependent chromatin remodeling	1	6	0.3861	27.049	0.036704	1	1	1	F4IHS2;
organ boundary specification between lateral organs and the meristem	1	8	0.3861	20.2952	0.048638	1	1	1	F4IHS2;
rRNA processing	2	68	0.772201	4.75695	0.0670414	1	1	1	Q8H136; Q8W4R3;
RNA splicing	3	126	1.1583	3.84474	0.0441914	1	1	1	Q9LZQ9; Q94A52; Q9SYP1;
RNA processing	1	33	0.3861	4.92471	0.185953	1	1	1	Q9LZQ9;
mRNA export from nucleus	1	25	0.3861	6.49999	0.144309	1	1	1	Q9LFN6;
respiratory electron transport chain	1	116	0.3861	1.4013	0.515152	1	1	1	P05642;
iron ion transport	2	24	0.772201	13.4744	0.00969736	1	1	1	P29036; P29390;
electron transport chain	1	11	0.3861	14.7652	0.0662633	1	1	1	P27787;
salicylic acid mediated signaling pathway	1	20	0.3861	8.12418	0.117211	1	1	1	Q9FJR0;
carbon fixation	2	36	0.772201	8.98417	0.0210824	1	1	1	P04711; P51059;
protein tetramerization	1	7	0.3861	23.1904	0.0426895	1	1	1	P04712;
response to ammonium ion	1	11	0.3861	14.7652	0.0662633	1	1	1	P04711;
cysteine biosynthetic process from serine	1	36	0.3861	4.51443	0.201043	1	1	1	P80608;
cellular response to calcium ion	1	3	0.3861	54.0082	0.0185229	1	1	1	B6TVL4;
protein heterotetramerization	3	8	1.1583	60.4838	1.29715e-05	0.0469696	0.00469696	0.0307815	P18122; Q84RL7; Q9XF59;
response to xenobiotic stimulus	3	7	1.1583	69.112	8.14463e-06	0.0294917	0.00385643	0.0252731	P09233; P18122; P18123;
photosynthesis, light harvesting	3	75	1.1583	6.45881	0.0115201	1	1	1	P06671; P12329; P27497;
starch biosynthetic process	5	111	1.9305	7.26408	0.000667818	1	0.134343	0.880413	P04713; P55234; Q08047; Q6XZ78; Q6XZ79;
DNA replication initiation	1	39	0.3861	4.16726	0.215855	1	1	1	Q9SX04;
CDP-diacylglycerol biosynthetic process	1	31	0.3861	5.24233	0.175735	1	1	1	Q41745;
phospholipid biosynthetic process	1	37	0.3861	4.39246	0.206011	1	1	1	Q9FPK7;
glycerol ether metabolic process	1	83	0.3861	1.95838	0.404153	1	1	1	Q41864;
cellulose biosynthetic process	1	91	0.3861	1.78623	0.43319	1	1	1	P80607;
protein refolding	2	39	0.772201	8.29326	0.0244978	1	1	1	P29185; Q43298;
regulation of endosperm development	1	14	0.3861	11.6035	0.0835633	1	1	1	Q9FYS5;
regulation of jasmonic acid mediated signaling pathway	1	45	0.3861	3.61175	0.244663	1	1	1	F4IHS2;
flavonol biosynthetic process	1	12	0.3861	13.5358	0.0720658	1	1	1	Q06509;
aerobic respiration	1	35	0.3861	4.64338	0.196044	1	1	1	P49727;
reductive pentose-phosphate cycle	4	734	1.5444	0.879321	0.670834	1	1	1	P00874; P05348; P09315; Q7SIC9;
nuclear-transcribed mRNA catabolic process, nonsense-mediated decay	4	29	1.5444	22.2485	3.05919e-05	0.110773	0.0100703	0.0659955	Q8H136; Q8W4R3; Q94A52; Q9FJR0;
RNA secondary structure unwinding	7	117	2.7027	9.64273	9.13312e-06	0.033071	0.00385643	0.0252731	P93008; Q9LFN6; Q84W89; Q8H136; Q8RXK6; Q8W4R3; Q94A52;
tRNA thio-modification	1	11	0.3861	14.7652	0.0662633	1	1	1	B6SXH2;
cyanate catabolic process	1	5	0.3861	32.4481	0.0306812	1	1	1	B6TTW1;
carboxylic acid metabolic process	1	13	0.3861	12.4954	0.0778324	1	1	1	P29038;
ribosome biogenesis	1	56	0.3861	2.90242	0.294766	1	1	1	O24573;
dTMP biosynthetic process	1	6	0.3861	27.049	0.036704	1	1	1	O81395;
glycine biosynthetic process	1	20	0.3861	8.12418	0.117211	1	1	1	O81395;
microtubule-based process	9	120	3.4749	12.084	6.88331e-08	0.000249245	6.23112e-05	0.000408356	P14641; P18025; P22275; Q02245; Q41782; Q41783; Q41784; Q43695; Q43697;
translational elongation	4	18	1.5444	35.8373	4.15909e-06	0.0150601	0.00251001	0.0164493	O24413; O24415; P46252; P52855;
regulation of actin cytoskeleton organization	4	6	1.5444	107.393	2.16222e-08	7.82939e-05	3.9147e-05	0.000256549	Q9FR39; P35081; P35082; P35083;
regulation of ethylene-activated signaling pathway	1	6	0.3861	27.049	0.036704	1	1	1	F4IHS2;
protein secretion	1	25	0.3861	6.49999	0.144309	1	1	1	O48950;
water transport	1	12	0.3861	13.5358	0.0720658	1	1	1	O64964;
sexual reproduction	4	39	1.5444	16.5453	0.000100897	0.365348	0.0260963	0.171022	P0C1Y5; P58738; Q07154; Q1ZYQ8;
L-phenylalanine catabolic process	1	60	0.3861	2.70896	0.312153	1	1	1	Q8VXG7;
malate metabolic process	2	44	0.772201	7.35106	0.0306502	1	1	1	P15719; Q08062;
response to redox state	1	3	0.3861	54.0082	0.0185229	1	1	1	P15719;
cytoplasmic microtubule organization	1	13	0.3861	12.4954	0.0778324	1	1	1	Q41874;
carbohydrate phosphorylation	1	3	0.3861	54.0082	0.0185229	1	1	1	Q6XZ78;
glutamine biosynthetic process	4	46	1.5444	14.028	0.000193469	0.70055	0.0437844	0.28694	P38559; P38560; P38561; P38563;
L-glutamate biosynthetic process	1	14	0.3861	11.6035	0.0835633	1	1	1	P23225;
glucose catabolic process	1	11	0.3861	14.7652	0.0662633	1	1	1	P30792;
long-day photoperiodism	1	4	0.3861	40.5398	0.0246209	1	1	1	Q9FJR0;
inositol biosynthetic process	1	23	0.3861	7.06496	0.133571	1	1	1	Q9FPK7;
positive regulation of translational elongation	1	20	0.3861	8.12418	0.117211	1	1	1	P80639;
positive regulation of translational termination	1	20	0.3861	8.12418	0.117211	1	1	1	P80639;
translational frameshifting	1	20	0.3861	8.12418	0.117211	1	1	1	P80639;
cellular response to sulfur starvation	1	8	0.3861	20.2952	0.048638	1	1	1	P52580;
myo-inositol hexakisphosphate biosynthetic process	1	16	0.3861	10.154	0.094919	1	1	1	Q84Y01;
inositol trisphosphate metabolic process	1	20	0.3861	8.12418	0.117211	1	1	1	Q84Y01;
phosphate-containing compound metabolic process	1	15	0.3861	10.8304	0.0892588	1	1	1	O48556;
nuclear migration	4	7	1.5444	92.0728	5.0205e-08	0.000181792	6.05974e-05	0.000397124	Q9FR39; P35081; P35082; P35083;
response to cycloheximide	1	7	0.3861	23.1904	0.0426895	1	1	1	Q8VXG7;
protein quality control for misfolded or incompletely synthesized proteins	1	16	0.3861	10.154	0.094919	1	1	1	P93648;
pyruvate metabolic process	1	18	0.3861	9.02636	0.106134	1	1	1	P11155;
anion transport	1	9	0.3861	18.0427	0.0545496	1	1	1	P42057;
L-methionine salvage from methylthioadenosine	2	43	0.772201	7.52197	0.0293753	1	1	1	B4G0F3; B6TZD1;
ribosome assembly	1	10	0.3861	16.2402	0.0604246	1	1	1	Q08069;
cinnamic acid biosynthetic process	1	52	0.3861	3.12564	0.276942	1	1	1	Q8VXG7;
rRNA acetylation involved in maturation of SSU-rRNA	1	2	0.3861	80.878	0.0123869	1	1	1	Q9XIK4;
tRNA acetylation	1	2	0.3861	80.878	0.0123869	1	1	1	Q9XIK4;
tRNA wobble cytosine modification	1	2	0.3861	80.878	0.0123869	1	1	1	Q9XIK4;
negative regulation of DNA recombination	1	5	0.3861	32.4481	0.0306812	1	1	1	B2LXS7;
phosphatidylcholine metabolic process	1	21	0.3861	7.73749	0.122698	1	1	1	Q43270;
detection of visible light	1	39	0.3861	4.16726	0.215855	1	1	1	P19862;
protein-tetrapyrrole linkage	1	36	0.3861	4.51443	0.201043	1	1	1	P19862;
sequestering of actin monomers	2	14	0.772201	23.0921	0.00333061	1	0.574292	1	Q9FR39; P35081;
phospholipase C-inhibiting G-protein coupled receptor signaling pathway	2	2	0.772201	160.955	3.84492e-05	0.139224	0.011602	0.0760338	Q9FR39; P35081;
'de novo' AMP biosynthetic process	1	22	0.3861	7.38595	0.128152	1	1	1	O24578;
RNA splicing, via transesterification reactions	1	6	0.3861	27.049	0.036704	1	1	1	P93008;
DNA packaging	1	5	0.3861	32.4481	0.0306812	1	1	1	O23813;
sulfide oxidation, using siroheme sulfite reductase	1	5	0.3861	32.4481	0.0306812	1	1	1	O23813;
plastid DNA packaging	1	2	0.3861	80.878	0.0123869	1	1	1	O23813;
protein transport by the Tat complex	1	8	0.3861	20.2952	0.048638	1	1	1	O48950;
ATP metabolic process	1	24	0.3861	6.77071	0.138957	1	1	1	P49087;
negative regulation of growth of symbiont in host	1	1	0.3861	160.955	0.00621267	1	0.803431	1	P33679;
positive regulation by host of cytolysis of symbiont cells	1	1	0.3861	160.955	0.00621267	1	0.803431	1	P33679;

## Sheet: Protein domain
Analysis: Protein domain
Dataset name: AC
Number of proteins in the dataset: 259
Number of proteins in the dataset (which are available in Protein domain database) :99
Number of proteins in background: 41689
Is analysis quantitative: No
						Corrected p-values
Protein domain	No. of genes in the dataset	No.of genes in the background dataset	Percentage of proteins	Fold enrichment	P-value (Hypergeometric test)	Bonferroni method	BH method	Q-value (Storey-Tibshirani method)
AAI	1	229	0.3861	0.709859	0.760947	1	1	1	O82106;
PKS_ER	1	65	0.3861	2.50061	0.333287	1	1	1	O24562;
14_3_3	2	59	0.772201	5.48246	0.0521956	1	1	1	P49106; Q01526;
Glyco_32	1	47	0.3861	3.45809	0.254029	1	1	1	P49174;
S_TKc	3	857	1.1583	0.565309	0.903207	1	1	1	P23111; P28523; P49101;
AAA	5	714	1.9305	1.12938	0.456647	1	1	1	P00827; P19023; P93648; Q9SX04; Q9SYP1;
ACTIN	1	92	0.3861	1.76682	0.436719	1	1	1	P02582;
Inhibitor_I29	2	48	0.772201	6.7386	0.035963	1	1	1	Q10716; Q10717;
Pept_C1	2	60	0.772201	5.3911	0.0537799	1	1	1	Q10716; Q10717;
ADF	1	31	0.3861	5.24233	0.175735	1	1	1	Q41764;
PbH1	2	28	0.772201	11.5502	0.0130667	1	0.583336	1	P26216; P35339;
C2	1	73	0.3861	2.22661	0.365764	1	1	1	Q43270;
ChtBD1	1	76	0.3861	2.13873	0.377532	1	1	1	P29022;
HATPase_c	2	92	0.772201	3.51614	0.112042	1	1	1	P19862; Q08277;
HisKA	1	71	0.3861	2.28932	0.357796	1	1	1	P19862;
AT_hook	1	13	0.3861	12.4954	0.0778324	1	1	1	Q9FYS5;
THN	1	40	0.3861	4.0631	0.220731	1	1	1	P33679;
EFh	2	270	0.772201	1.19818	0.501057	1	1	1	P41040; P49101;
RRM	2	196	0.772201	1.65053	0.344178	1	1	1	P10979; Q6JB11;
Aamy	1	31	0.3861	5.24233	0.175735	1	1	1	Q08047;
BAH	1	22	0.3861	7.38595	0.128152	1	1	1	Q9AXT8;
BRCT	1	18	0.3861	9.02636	0.106134	1	1	1	Q9ZSV1;
DEXDc	11	221	4.2471	8.01827	1.63156e-07	0.000101973	2.66765e-05	0.000162607	F4IHS2; Q9LZQ9; P93008; Q41741; Q9LFN6; Q84W89; Q8H136; Q8RXK6; Q8W4R3; Q94A52; Q9SYP1;
HELICc	11	222	4.2471	7.98215	1.70729e-07	0.000106706	2.66765e-05	0.000162607	F4IHS2; Q9LZQ9; P93008; Q41741; Q9LFN6; Q84W89; Q8H136; Q8RXK6; Q8W4R3; Q94A52; Q9SYP1;
QLQ	1	24	0.3861	6.77071	0.138957	1	1	1	F4IHS2;
PP2Ac	1	56	0.3861	2.90242	0.294766	1	1	1	P22198;
Catalase	2	41	0.772201	7.88881	0.0268914	1	0.800339	1	P18122; P18123;
SnAC	1	3	0.3861	54.0082	0.0185229	1	0.680989	1	F4IHS2;
CHROMO	1	23	0.3861	7.06496	0.133571	1	1	1	Q9AXT8;
PINT	1	22	0.3861	7.38595	0.128152	1	1	1	Q9XHR2;
Cyanate_lyase	1	13	0.3861	12.4954	0.0778324	1	1	1	B6TTW1;
CY	1	25	0.3861	6.49999	0.144309	1	1	1	P31726;
WW	1	12	0.3861	13.5358	0.0720658	1	1	1	Q8H136;
HA2	1	20	0.3861	8.12418	0.117211	1	1	1	Q9LZQ9;
Sec63	1	8	0.3861	20.2952	0.048638	1	1	1	Q9SYP1;
UBQ	1	78	0.3861	2.0839	0.385257	1	1	1	P27923;
Transket_pyr	1	33	0.3861	4.92471	0.185953	1	1	1	Q7SIC9;
DPBB_1	4	98	1.5444	6.58535	0.00332943	1	0.189172	1	P0C1Y5; P58738; Q07154; Q1ZYQ8;
GAF	1	65	0.3861	2.50061	0.333287	1	1	1	P19862;
Enolase_C	2	13	0.772201	24.867	0.00286653	1	0.179158	1	P26301; P42895;
Enolase_N	2	13	0.772201	24.867	0.00286653	1	0.179158	1	P26301; P42895;
Tubulin	10	124	3.861	12.9922	6.31354e-09	3.94596e-06	1.97298e-06	1.20264e-05	P14641; P18025; P22275; Q02245; Q41782; Q41783; Q41784; Q41874; Q43695; Q43697;
Tubulin_C	10	124	3.861	12.9922	6.31354e-09	3.94596e-06	1.97298e-06	1.20264e-05	P14641; P18025; P22275; Q02245; Q41782; Q41783; Q41784; Q41874; Q43695; Q43697;
Gp_dh_N	4	50	1.5444	12.906	0.000267777	0.16736	0.0278934	0.170025	P08735; P09315; Q09054; Q43247;
Gln-synt_C	4	47	1.5444	13.7296	0.000210439	0.131524	0.0263049	0.160342	P38559; P38560; P38561; P38563;
PlsC	1	32	0.3861	5.07856	0.18086	1	1	1	Q41745;
H15	2	26	0.772201	12.4383	0.0113264	1	0.544538	1	P23444; Q9FYS5;
H2A	1	60	0.3861	2.70896	0.312153	1	1	1	P40280;
H2B	1	62	0.3861	2.62159	0.320685	1	1	1	P30756;
H3	1	46	0.3861	3.53325	0.24936	1	1	1	P69246;
H4	1	19	0.3861	8.55154	0.11169	1	1	1	Q41811;
Ribosomal_L14	1	136	0.3861	1.19524	0.572131	1	1	1	P08529;
HMG	2	25	0.772201	12.9356	0.0104978	1	0.544538	1	P27347; Q9LEF5;
eIF2B_5	1	7	0.3861	23.1904	0.0426895	1	1	1	P55876;
eIF-5a	1	20	0.3861	8.12418	0.117211	1	1	1	P80639;
eIF5C	1	4	0.3861	40.5398	0.0246209	1	0.769404	1	P55876;
LON	1	14	0.3861	11.6035	0.0835633	1	1	1	P93648;
malic	1	18	0.3861	9.02636	0.106134	1	1	1	P16243;
Malic_M	1	18	0.3861	9.02636	0.106134	1	1	1	P16243;
MCM	1	26	0.3861	6.25009	0.149629	1	1	1	Q9SX04;
KOW	1	32	0.3861	5.07856	0.18086	1	1	1	O22424;
Aldolase_II	1	10	0.3861	16.2402	0.0604246	1	1	1	B4G0F3;
PADR1	1	7	0.3861	23.1904	0.0426895	1	1	1	Q9ZSV1;
WGR	1	11	0.3861	14.7652	0.0662633	1	1	1	Q9ZSV1;
zf-PARP	1	4	0.3861	40.5398	0.0246209	1	0.769404	1	Q9ZSV1;
PAS	1	46	0.3861	3.53325	0.24936	1	1	1	P19862;
PLDc	1	24	0.3861	6.77071	0.138957	1	1	1	Q43270;
PROF	6	183	2.3166	5.28573	0.00104306	0.651912	0.0931303	0.567678	A4KA61; A4KA58; Q9FR39; P35081; P35082; P35083;
Adenylsucc_synt	1	22	0.3861	7.38595	0.128152	1	1	1	O24578;
S4	1	246	0.3861	0.660806	0.785108	1	1	1	O22424;
Ribosomal_S27	1	13	0.3861	12.4954	0.0778324	1	1	1	P27923;
RuBisCO_small	1	128	0.3861	1.26994	0.550187	1	1	1	P05348;
Ribosomal_L19e	1	4	0.3861	40.5398	0.0246209	1	0.769404	1	Q08066;
Ribosomal_S10	1	21	0.3861	7.73749	0.122698	1	1	1	Q08068;
Ribosomal_S15	1	108	0.3861	1.50509	0.490298	1	1	1	Q05761;
Ribosomal_S13_N	1	7	0.3861	23.1904	0.0426895	1	1	1	Q05761;
FACT-Spt16_Nlob	1	3	0.3861	54.0082	0.0185229	1	0.680989	1	Q8H6B1;
Rtt106	2	9	0.772201	35.9068	0.00134489	0.840558	0.10507	0.640455	Q8H6B1; Q9LEF5;
SPT16	1	3	0.3861	54.0082	0.0185229	1	0.680989	1	Q8H6B1;
