# Supplementary material for: Physiological Mechanisms Underlying Tassel Symptom Formation in Maize Infected with Sporisorium reilianum
Source: Plants (Basel). 2024 Jan 15;13(2):238. doi: 10.3390/plants13020238 (PMC10820020; doi:10.3390/plants13020238)
Supplement: Supplementary file 1 [file plants-13-00238-s001.zip › BC.xls]

## Sheet: perseus-result
Significant	Difference	-Log(P-value）	Protein IDs	Majority protein IDs	Symbol color	Symbol type	Symbol size	Only identified by site	Reverse	Potential contaminant	t-test Significant	Q-value	Score	Intensity	MS/MS Count	-Log t-test p-value	t-test Difference	B1	B2	B3	C1	C2	C3
	0.0977377	0.297562	sp|A0A1D6LAB7|RH3B_MAIZE;sp|A0A1D6GDY8|RH3A_MAIZE;sp|Q8L7S8|RH3_ARATH	sp|A0A1D6LAB7|RH3B_MAIZE;sp|A0A1D6GDY8|RH3A_MAIZE;sp|Q8L7S8|RH3_ARATH	Color [DarkGray]	1	4					0	3.9855	78520000	2	0.297562	0.0977377	0.396134	0	0	0	0.0416038	0.0613173
	0.0556397	0.465499	sp|A0A1D6LAG9|CPS1_MAIZE	sp|A0A1D6LAG9|CPS1_MAIZE	Color [DarkGray]	1	4					0.0030675	3.526	151820000	6	0.465499	0.0556397	0.200692	0.0956227	0.158896	0.178734	0.0449241	0.0646343
+	0.799943	1.30811	sp|A1Y2B7|SGS3_MAIZE	sp|A1Y2B7|SGS3_MAIZE	Color [DarkGray]	1	4				+	0	57.626	1282000000	27	1.30811	0.799943	1.0018	1.262	1.95909	0.643453	0.574529	0.605075
+	-0.126212	3.50814	sp|A4KA61|PRO12_MAIZE;sp|A4KA60|PRO11_MAIZE;sp|A4KA56|PROF7_MAIZE	sp|A4KA61|PRO12_MAIZE;sp|A4KA60|PRO11_MAIZE;sp|A4KA56|PROF7_MAIZE	Color [DarkGray]	1	4				+	0	30.14	91471000	2	3.50814	-0.126212	0	0	0	0.141775	0.131487	0.105374
+	-0.869934	1.45437	sp|A4KA58|PROF9_MAIZE;sp|A4KA59|PRO10_MAIZE	sp|A4KA58|PROF9_MAIZE;sp|A4KA59|PRO10_MAIZE	Color [DarkGray]	1	4				+	0	85.026	685390000	12	1.45437	-0.869934	0.142042	0	0	0.370749	1.21767	1.16343
+	-0.332298	1.16611	sp|A5H453|PER42_MAIZE	sp|A5H453|PER42_MAIZE	Color [DarkGray]	1	4					0	9.2994	238990000	7	1.16611	-0.332298	0	0	0	0.600273	0.195735	0.200888
+	0.779173	1.30616	sp|A5H8G4|PER1_MAIZE	sp|A5H8G4|PER1_MAIZE	Color [DarkGray]	1	4				+	0	48.785	1260500000	29	1.30616	0.779173	0.835463	1.56781	1.68541	0.60607	0.424743	0.720348
+	1.73273	1.02139	sp|B1P123|BX7_MAIZE	sp|B1P123|BX7_MAIZE	Color [DarkGray]	1	4					0	194.11	4428400000	55	1.02139	1.73273	4.86823	3.96963	4.35445	3.94934	1.34292	2.70186
+	0.153108	2.45616	sp|B2LXS7|WHY1_MAIZE	sp|B2LXS7|WHY1_MAIZE	Color [DarkGray]	1	4				+	0	13.775	141220000	2	2.45616	0.153108	0.207231	0.167004	0.20724	0.0689993	0.0531519	0
+	0.101298	3.85929	sp|B4F9A4|DMAS1_MAIZE	sp|B4F9A4|DMAS1_MAIZE	Color [DarkGray]	1	4				+	0	25.071	128420000	2	3.85929	0.101298	0.166827	0.145667	0.152415	0.049035	0.060139	0.0518426
+	0.372105	2.60059	sp|B4FBQ7|CSPL6_MAIZE;sp|B6SR79|CSPL7_MAIZE	sp|B4FBQ7|CSPL6_MAIZE	Color [DarkGray]	1	4				+	0	49.993	273850000	2	2.60059	0.372105	0.373742	0.511956	0.343938	0.0546676	0	0.0586541
	0.051794	0.0702053	sp|B4FHF0|EFTS_MAIZE	sp|B4FHF0|EFTS_MAIZE	Color [DarkGray]	1	4					0	11.315	360610000	5	0.0702053	0.051794	0.847391	0.086511	0.0812294	0.201306	0.335757	0.322687
	0.000431733	0.00882115	sp|B4FR29|RAF1_MAIZE	sp|B4FR29|RAF1_MAIZE	Color [DarkGray]	1	4					0.0084507	2.6717	12463000	1	0.00882115	0.000431733	0.0347984	0	0	0	0	0.0335032
+	10.2839	2.24951	sp|B4G072|BX9_MAIZE;sp|P80623|UC17_MAIZE	sp|B4G072|BX9_MAIZE	Color [DarkGray]	1	4				+	0	247.3	18277000000	91	2.24951	10.2839	18.9316	16.9515	23.2627	8.71742	9.67132	9.90517
+	2.53398	2.43499	sp|B4G0F3|MTBC_MAIZE	sp|B4G0F3|MTBC_MAIZE	Color [DarkGray]	1	4				+	0	56.965	3839900000	40	2.43499	2.53398	4.50757	4.08723	4.44282	1.07273	2.42262	1.94033
	0.133508	0.764775	sp|B5BT18|BTAF1_ARATH	sp|B5BT18|BTAF1_ARATH	Color [DarkGray]	1	4					0.002907	3.1133	170360000	2	0.764775	0.133508	0.0431273	0.228133	0.314654	0.0744303	0.0538963	0.0570649
	-0.00861936	0.850151	sp|B6SGC5|CNR6_MAIZE	sp|B6SGC5|CNR6_MAIZE	Color [DarkGray]	1	4					0.0056818	2.8854	12448000	1	0.850151	-0.00861936	0	0	0.0141079	0.0134655	0.0128218	0.0136786
	0.00668968	0.112575	sp|B6SHG7|TRMB_MAIZE	sp|B6SHG7|TRMB_MAIZE	Color [DarkGray]	1	4					0	4.0951	15642000	2	0.112575	0.00668968	0.0546165	0	0	0.0345475	0	0
	0.0594168	0.403325	sp|B6SJQ0|CNR13_MAIZE	sp|B6SJQ0|CNR13_MAIZE	Color [DarkGray]	1	4					0.0030303	3.4323	107070000	5	0.403325	0.0594168	0.161452	0	0.202615	0.0764927	0.0468068	0.0625168
+	0.466975	1.68377	sp|B6TB21|DRE2_MAIZE	sp|B6TB21|DRE2_MAIZE	Color [DarkGray]	1	4				+	0	45.253	874890000	14	1.68377	0.466975	0.73878	0.8883	1.13262	0.384975	0.418913	0.554887
	0.419408	0.895861	sp|B6TNW8|ITPA_MAIZE	sp|B6TNW8|ITPA_MAIZE	Color [DarkGray]	1	4					0	25.118	310420000	8	0.895861	0.419408	0.933986	0.258554	0.306212	0.114308	0.0613049	0.0649158
+	0.815691	0.963337	sp|B6TTW1|CYNS_MAIZE	sp|B6TTW1|CYNS_MAIZE	Color [DarkGray]	1	4					0	15.151	957470000	12	0.963337	0.815691	0.420198	1.52825	1.46073	0.150906	0.152165	0.659031
+	-0.295679	1.26305	sp|B6TVL4|CAS_MAIZE	sp|B6TVL4|CAS_MAIZE	Color [DarkGray]	1	4					0	10.167	275230000	6	1.26305	-0.295679	0	0.120474	0	0.148151	0.50001	0.359351
+	1.57045	2.11635	sp|B6TZD1|MTNA_MAIZE	sp|B6TZD1|MTNA_MAIZE	Color [DarkGray]	1	4				+	0	213.72	4485700000	51	2.11635	1.57045	4.49475	4.04028	4.43673	2.94895	2.19784	3.11363
	-0.0716927	0.934353	sp|B6U151|GATA_MAIZE	sp|B6U151|GATA_MAIZE	Color [DarkGray]	1	4					0	4.0622	52082000	3	0.934353	-0.0716927	0	0	0	0	0.105118	0.10996
+	0.7919	2.53008	sp|C0PF72|ARGJ_MAIZE	sp|C0PF72|ARGJ_MAIZE	Color [DarkGray]	1	4				+	0	51.219	838280000	19	2.53008	0.7919	1.30216	0.98367	0.993314	0.428731	0.239052	0.235664
	0.35043	0.922777	sp|C0PN26|LISC2_MAIZE	sp|C0PN26|LISC2_MAIZE	Color [DarkGray]	1	4					0	43.191	238380000	3	0.922777	0.35043	0	0.498355	0.560573	0.00763667	0	0
	0.197004	0.80608	sp|D8WUA4|SECA2_ARATH	sp|D8WUA4|SECA2_ARATH	Color [DarkGray]	1	4					0.0084746	2.6737	289600000	1	0.80608	0.197004	0.0993041	0.384019	0.467857	0.156631	0.10177	0.101767
	-0.0835859	0.634579	sp|D9HP23|CNR7_MAIZE	sp|D9HP23|CNR7_MAIZE	Color [DarkGray]	1	4					0	5.4777	88894000	1	0.634579	-0.0835859	0.0718339	0	0	0.174865	0.147726	0
	0	0	sp|F4IDQ6|NIH_ARATH	sp|F4IDQ6|NIH_ARATH	Color [DarkGray]	1	4					0.005698	2.8865	0	2	0	0	0	0	0	0	0	0
+	0.18292	1.89046	sp|F4IHS2|SYD_ARATH	sp|F4IHS2|SYD_ARATH	Color [DarkGray]	1	4				+	0	3.9383	215920000	3	1.89046	0.18292	0.253385	0.27516	0.265088	0	0.141653	0.103222
+	0.421052	2.66452	sp|F4JAA5|SKI2_ARATH	sp|F4JAA5|SKI2_ARATH	Color [DarkGray]	1	4				+	0.0029499	3.2313	395180000	3	2.66452	0.421052	0.556489	0.519499	0.529937	0.196442	0.146328	0
+	1.06923	1.15251	sp|F4KBP5|CHR4_ARATH	sp|F4KBP5|CHR4_ARATH	Color [DarkGray]	1	4					0.0029155	3.1165	1312500000	3	1.15251	1.06923	0.968668	1.53539	2.19319	0	0.641998	0.847573
	0.0482277	0.072873	sp|K7VLR4|APT1_MAIZE	sp|K7VLR4|APT1_MAIZE	Color [DarkGray]	1	4					0.0029762	3.2915	258920000	2	0.072873	0.0482277	0.68239	0	0.0838938	0.381464	0.137781	0.102356
+	15.4493	2.58605	sp|O22424|RS4_MAIZE	sp|O22424|RS4_MAIZE	Color [DarkGray]	1	4				+	0	224.18	25078000000	119	2.58605	15.4493	30.0932	24.0451	29.8363	13.1505	10.2341	14.242
+	7.56809	2.27933	sp|Q9FR39|PROF5_MAIZE;sp|O22655|PROF4_MAIZE	sp|Q9FR39|PROF5_MAIZE;sp|O22655|PROF4_MAIZE	Color [DarkGray]	1	4				+	0	76.2	8954400000	36	2.27933	7.56809	13.2609	8.96565	11.407	4.77791	3.25099	2.90045
+	0.115144	1.98705	sp|Q9LZQ9|DEAH2_ARATH;sp|O22899|PRP43_ARATH	sp|Q9LZQ9|DEAH2_ARATH;sp|O22899|PRP43_ARATH	Color [DarkGray]	1	4				+	0	6.4512	101490000	3	1.98705	0.115144	0.193748	0.116165	0.124	0.038968	0.0289261	0.0205881
	1.13225	0.882975	sp|O23813|SIR_MAIZE	sp|O23813|SIR_MAIZE	Color [DarkGray]	1	4					0	106.06	2973900000	38	0.882975	1.13225	4.13284	2.48315	2.31189	2.11786	1.65171	1.76157
+	-0.332743	2.17575	sp|O23888|ALDO2_MAIZE;sp|O23887|ALDO1_MAIZE	sp|O23888|ALDO2_MAIZE;sp|O23887|ALDO1_MAIZE	Color [DarkGray]	1	4				+	0	25.37	252790000	10	2.17575	-0.332743	0	0	0.0267029	0.21413	0.401504	0.409297
+	4.04758	3.02728	sp|O24413|RLA3_MAIZE	sp|O24413|RLA3_MAIZE	Color [DarkGray]	1	4				+	0	93.778	7206300000	22	3.02728	4.04758	7.27013	7.42577	8.50813	3.23911	3.72055	4.10163
+	-0.542425	1.59356	sp|O24415|RLA2B_MAIZE	sp|O24415|RLA2B_MAIZE	Color [DarkGray]	1	4				+	0	67.43	672350000	10	1.59356	-0.542425	0.402894	0.103085	0.165208	0.778536	0.979027	0.5409
+	-2.30082	2.56455	sp|O24562|CADH_MAIZE	sp|O24562|CADH_MAIZE	Color [DarkGray]	1	4				+	0	323.31	4961200000	58	2.56455	-2.30082	2.63503	2.5932	2.37172	5.20298	4.15762	5.14182
+	12.3902	2.65839	sp|O24573|RLA0_MAIZE	sp|O24573|RLA0_MAIZE	Color [DarkGray]	1	4				+	0	105.47	19039000000	63	2.65839	12.3902	22.6862	19.1851	22.7358	6.50089	10.335	10.6006
+	1.92252	1.67711	sp|O24578|PURA_MAIZE	sp|O24578|PURA_MAIZE	Color [DarkGray]	1	4				+	0	242.13	3192300000	47	1.67711	1.92252	4.57104	2.92373	3.23596	1.90847	1.50176	1.55294
	-0.00504773	0.0523756	sp|O24581|BIP3_MAIZE	sp|O24581|BIP3_MAIZE	Color [DarkGray]	1	4					0	6.249	85665000	4	0.0523756	-0.00504773	0.0831044	0.104141	0	0.0629592	0.053849	0.0855801
+	4.35044	1.2678	sp|O48556|IPYR_MAIZE	sp|O48556|IPYR_MAIZE	Color [DarkGray]	1	4					0	146.98	6435000000	56	1.2678	4.35044	4.08181	7.84144	9.50454	2.5274	3.00226	2.84679
+	6.6489	2.69249	sp|O48557|RL17_MAIZE	sp|O48557|RL17_MAIZE	Color [DarkGray]	1	4				+	0	206.91	10958000000	69	2.69249	6.6489	13.2646	10.3543	12.8765	5.34957	5.88275	5.31633
+	1.63534	3.04536	sp|O48558|RL30_MAIZE	sp|O48558|RL30_MAIZE	Color [DarkGray]	1	4				+	0	69.938	1862800000	21	3.04536	1.63534	2.13807	2.17874	2.65268	0.522272	0.762047	0.779154
	-0.00441953	0.912767	sp|O48950|TATB_MAIZE	sp|O48950|TATB_MAIZE	Color [DarkGray]	1	4					0.0083565	2.6276	3233100	2	0.912767	-0.00441953	0	0	0	0	0.00745466	0.00580392
	0.438313	0.667313	sp|O64411|PAO_MAIZE	sp|O64411|PAO_MAIZE	Color [DarkGray]	1	4					0	118.86	2740700000	38	0.667313	0.438313	2.89025	1.88433	2.36169	1.86324	2.07133	1.88676
+	3.11052	2.75845	sp|O64964|TIP11_MAIZE	sp|O64964|TIP11_MAIZE	Color [DarkGray]	1	4				+	0	67.233	5014300000	13	2.75845	3.11052	4.81897	5.81648	5.89113	2.03503	2.32076	2.83922
	-0.15599	0.76373	sp|O65101|PSAH_MAIZE	sp|O65101|PSAH_MAIZE	Color [DarkGray]	1	4					0	119.55	132450000	6	0.76373	-0.15599	0	0.0429024	0	0.354023	0.0546328	0.102217
+	-0.523688	2.384	sp|O65107|PSAN_MAIZE	sp|O65107|PSAN_MAIZE	Color [DarkGray]	1	4				+	0	12.155	914880000	9	2.384	-0.523688	0.38394	0.400518	0.443803	0.771438	0.958428	1.06946
+	0.0765189	1.74117	sp|O81220|DCUP_MAIZE	sp|O81220|DCUP_MAIZE	Color [DarkGray]	1	4				+	0	7.7026	129770000	5	1.74117	0.0765189	0.181282	0.126019	0.124519	0.0541384	0.0735737	0.0745507
+	0.537193	1.06082	sp|O81395|DRTS_MAIZE	sp|O81395|DRTS_MAIZE	Color [DarkGray]	1	4					0	22.27	501850000	8	1.06082	0.537193	1.18184	0.450249	0.509979	0.251828	0.114016	0.164647
	0.233072	0.81009	sp|O81482|IF4E2_MAIZE	sp|O81482|IF4E2_MAIZE	Color [DarkGray]	1	4					0	56.741	596230000	16	0.81009	0.233072	0.310975	0.675574	0.717443	0.399983	0.302247	0.302546
+	3.64329	1.33879	sp|O82106|ZM33_MAIZE	sp|O82106|ZM33_MAIZE	Color [DarkGray]	1	4				+	0	66.755	1941400000	33	1.33879	3.64329	6.19764	2.09156	2.75252	0.0163062	0.0347498	0.060802
	1.97332	0.83373	sp|P00056|CYC_MAIZE	sp|P00056|CYC_MAIZE	Color [DarkGray]	1	4					0	13.133	1299500000	5	0.83373	1.97332	3.56842	2.82098	0	0.469432	0	0
+	-2.26797	1.15294	sp|P00333|ADH1_MAIZE	sp|P00333|ADH1_MAIZE	Color [DarkGray]	1	4					0	253.86	7565800000	61	1.15294	-2.26797	4.96359	4.09766	4.67673	8.56243	5.58183	6.39761
	0.12786	0.0921769	sp|P00412|COX2_MAIZE	sp|P00412|COX2_MAIZE	Color [DarkGray]	1	4					0	34.848	2839600000	24	0.0921769	0.12786	3.13928	1.73439	2.04476	2.67571	1.86936	1.98978
+	-27.3009	2.76736	sp|P00827|ATPB_MAIZE	sp|P00827|ATPB_MAIZE	Color [DarkGray]	1	4				+	0	323.31	32512000000	179	2.76736	-27.3009	17.4677	6.09373	7.29568	36.8279	37.2638	38.668
+	-0.178786	3.67364	sp|P00835|ATPE_MAIZE	sp|P00835|ATPE_MAIZE	Color [DarkGray]	1	4				+	0	34.236	129080000	2	3.67364	-0.178786	0	0	0	0.206536	0.162918	0.166903
+	-72.7101	4.39339	sp|P00874|RBL_MAIZE	sp|P00874|RBL_MAIZE	Color [DarkGray]	1	4				+	0	323.31	60266000000	202	4.39339	-72.7101	5.48507	6.0865	6.34867	78.8533	72.1716	85.0258
	0.221385	0.714672	sp|P02355|RR4_MAIZE	sp|P02355|RR4_MAIZE	Color [DarkGray]	1	4					0	9.6779	415730000	4	0.714672	0.221385	0.204175	0.409605	0.67643	0.281445	0.163304	0.181306
+	5.91111	1.31239	sp|P02582|ACT1_MAIZE	sp|P02582|ACT1_MAIZE	Color [DarkGray]	1	4				+	0	283.45	23302000000	89	1.31239	5.91111	23.9844	18.3414	21.6984	17.9095	13.3634	15.018
+	-0.736369	2.36526	sp|P04707|ADH2_MAIZE	sp|P04707|ADH2_MAIZE	Color [DarkGray]	1	4				+	0	18.031	686870000	16	2.36526	-0.736369	0.256537	0.0250646	0.105094	1.07819	0.764962	0.752652
+	11.2848	2.28489	sp|P04709|ADT1_MAIZE	sp|P04709|ADT1_MAIZE	Color [DarkGray]	1	4				+	0	78.346	31052000000	89	2.28489	11.2848	29.1609	28.8826	31.899	22.2863	16.9015	16.9004
+	-31.8352	4.89591	sp|P04711|CAPP1_MAIZE	sp|P04711|CAPP1_MAIZE	Color [DarkGray]	1	4				+	0	323.31	24815000000	199	4.89591	-31.8352	0.902397	1.55027	1.65807	31.7093	32.3409	35.5662
	0.840037	0.145809	sp|P04712|SUS1_MAIZE	sp|P04712|SUS1_MAIZE	Color [DarkGray]	1	4					0	323.31	22626000000	154	0.145809	0.840037	19.743	14.0214	20.2774	18.0401	15.6624	17.8193
+	-2.66407	4.33827	sp|P04713|SSG1_MAIZE	sp|P04713|SSG1_MAIZE	Color [DarkGray]	1	4				+	0	97.711	2182500000	32	4.33827	-2.66407	0.446537	0.078278	0.120222	2.85238	2.75732	3.02754
+	11.3941	1.91049	sp|P04907|GSTF3_MAIZE	sp|P04907|GSTF3_MAIZE	Color [DarkGray]	1	4				+	0	99.575	12286000000	58	1.91049	11.3941	21.0935	12.2809	14.8718	5.02195	4.18126	4.86078
+	-1.25871	2.0197	sp|P04966|PSAA_MAIZE	sp|P04966|PSAA_MAIZE	Color [DarkGray]	1	4				+	0	13.499	1025800000	10	2.0197	-1.25871	0.0776407	0.105922	0.0815687	1.8842	1.12153	1.03555
+	-2.39735	3.38913	sp|P04967|PSAB_MAIZE	sp|P04967|PSAB_MAIZE	Color [DarkGray]	1	4				+	0	59.361	2142400000	31	3.38913	-2.39735	0.356128	0.289833	0.313561	3.12003	2.36283	2.66873
+	-23.3906	4.52666	sp|P05022|ATPA_MAIZE	sp|P05022|ATPA_MAIZE	Color [DarkGray]	1	4				+	0	305.48	22176000000	111	4.52666	-23.3906	5.58271	3.1576	3.712	28.9652	26.0903	27.5685
+	-12.596	2.8958	sp|P05348|RBS_MAIZE	sp|P05348|RBS_MAIZE	Color [DarkGray]	1	4				+	0	119.29	10570000000	56	2.8958	-12.596	1.89146	1.15916	0.449406	16.7641	12.2007	12.3232
+	15.2951	1.59789	sp|P05494|ATPAM_MAIZE	sp|P05494|ATPAM_MAIZE	Color [DarkGray]	1	4				+	0	227.83	55745000000	201	1.59789	15.2951	53.4597	48.2226	52.1056	27.8009	39.4336	40.6682
+	-4.5464	2.57911	sp|P05641|PSBB_MAIZE	sp|P05641|PSBB_MAIZE	Color [DarkGray]	1	4				+	0	87.844	5127500000	35	2.57911	-4.5464	1.8151	1.45085	1.06741	6.5954	4.69722	6.67995
+	-0.811806	1.08866	sp|P05642|CYB6_MAIZE	sp|P05642|CYB6_MAIZE	Color [DarkGray]	1	4					0	17.927	749040000	6	1.08866	-0.811806	0.0237311	0.162951	0.176983	1.62163	0.511707	0.665743
+	-0.0600367	1.17917	sp|P05643|PETD_MAIZE	sp|P05643|PETD_MAIZE	Color [DarkGray]	1	4					0.0030395	3.4732	43206000	5	1.17917	-0.0600367	0	0	0	0.107907	0.0366978	0.0355051
	0.0745661	0.156295	sp|P06586|RR3_MAIZE	sp|P06586|RR3_MAIZE	Color [DarkGray]	1	4					0.008427	2.6704	164730000	1	0.156295	0.0745661	0	0	0.489248	0	0.232962	0.0325869
+	-1.78139	2.50444	sp|P06671|CB22_MAIZE;sp|Q00827|CB48_MAIZE	sp|P06671|CB22_MAIZE;sp|Q00827|CB48_MAIZE	Color [DarkGray]	1	4				+	0	41.193	2449100000	18	2.50444	-1.78139	0.72733	0.874619	1.0474	2.22006	2.63889	3.13459
+	45.1303	1.92978	sp|P08440|ALF_MAIZE	sp|P08440|ALF_MAIZE	Color [DarkGray]	1	4				+	0	323.31	120530000000	330	1.92978	45.1303	132.403	98.7081	124.234	74.968	74.8656	70.1208
	0.0135408	0.0333721	sp|P08529|RK14_MAIZE	sp|P08529|RK14_MAIZE	Color [DarkGray]	1	4					0	5.7456	139890000	5	0.0333721	0.0135408	0.398454	0	0	0.18621	0.079013	0.0926082
+	21.2189	3.39168	sp|P08735|G3PC1_MAIZE	sp|P08735|G3PC1_MAIZE	Color [DarkGray]	1	4				+	0	310.98	36095000000	76	3.39168	21.2189	36.0127	39.0896	42.3885	16.7758	18.0504	19.0079
	0.0401439	0.490214	sp|P09004|MI25_MAIZE	sp|P09004|MI25_MAIZE	Color [DarkGray]	1	4					0	61.437	716230000	17	0.490214	0.0401439	0.553153	0.558418	0.596448	0.594897	0.501113	0.491578
+	2.6257	2.19956	sp|P09233|SODM1_MAIZE;sp|P41979|SODM3_MAIZE	sp|P09233|SODM1_MAIZE;sp|P41979|SODM3_MAIZE	Color [DarkGray]	1	4				+	0	323.31	4975900000	67	2.19956	2.6257	4.4667	5.05457	6.15208	2.74451	2.46306	2.58866
+	-15.9315	3.08382	sp|P09315|G3PA_MAIZE	sp|P09315|G3PA_MAIZE	Color [DarkGray]	1	4				+	0	323.31	13305000000	73	3.08382	-15.9315	1.70045	1.20514	1.32267	20.7977	15.1035	16.1218
+	-1.99046	2.08859	sp|P0C1M0|ATPG_MAIZE	sp|P0C1M0|ATPG_MAIZE	Color [DarkGray]	1	4				+	0	63.004	1866700000	26	2.08859	-1.99046	0.460719	0.275084	0.293159	1.81266	2.05999	3.1277
+	-5.30221	3.42747	sp|P0C1Y5|EXB11_MAIZE	sp|P0C1Y5|EXB11_MAIZE	Color [DarkGray]	1	4				+	0	146.72	3927000000	39	3.42747	-5.30221	0	0.120093	0.0949406	4.57377	5.3274	6.2205
+	-0.173706	2.18994	sp|P10581|RPOP_MAIZE	sp|P10581|RPOP_MAIZE	Color [DarkGray]	1	4				+	0	13.622	142150000	6	2.18994	-0.173706	0	0.0320526	0	0.129745	0.239075	0.18435
	-0.0554265	0.427243	sp|P10582|DPOM_MAIZE	sp|P10582|DPOM_MAIZE	Color [DarkGray]	1	4					0	5.0825	39587000	2	0.427243	-0.0554265	0	0	0	0.166279	0	0
+	1.46561	2.52777	sp|P10979|GRPA_MAIZE	sp|P10979|GRPA_MAIZE	Color [DarkGray]	1	4				+	0	71.828	1970000000	21	2.52777	1.46561	1.96672	2.435	2.48698	1.13124	0.611079	0.749534
+	61.7933	4.07191	sp|P11143|HSP70_MAIZE	sp|P11143|HSP70_MAIZE	Color [DarkGray]	1	4				+	0	323.31	79309000000	264	4.07191	61.7933	95.372	88.6455	100.988	30.5311	34.7285	34.3658
+	-32.0673	3.16788	sp|P11155|PPDK1_MAIZE	sp|P11155|PPDK1_MAIZE	Color [DarkGray]	1	4				+	0	323.31	23586000000	131	3.16788	-32.0673	0.481985	0.286017	0.279259	39.1268	28.5658	29.5566
+	1.26243	3.04941	sp|P11428|SODC2_MAIZE	sp|P11428|SODC2_MAIZE	Color [DarkGray]	1	4				+	0	9.8346	1514800000	8	3.04941	1.26243	2.09808	1.66843	1.85685	0.485099	0.627425	0.723553
+	-1.21333	3.91193	sp|P11601|PSAC_MAIZE	sp|P11601|PSAC_MAIZE	Color [DarkGray]	1	4				+	0	38.508	1187900000	11	3.91193	-1.21333	0.349111	0.291951	0.08334	1.46	1.42634	1.47807
+	-1.57019	2.21296	sp|P12329|CB21_MAIZE	sp|P12329|CB21_MAIZE	Color [DarkGray]	1	4				+	0	26.783	3423700000	17	2.21296	-1.57019	1.44553	1.77327	1.96502	2.87052	3.75289	3.27099
+	7.65782	2.4914	sp|P12653|GSTF1_MAIZE	sp|P12653|GSTF1_MAIZE	Color [DarkGray]	1	4				+	0	171.55	19637000000	88	2.4914	7.65782	20.7886	17.297	20.1267	12.2058	10.6107	12.4224
	-0.0145769	0.397283	sp|P12857|ADT2_MAIZE	sp|P12857|ADT2_MAIZE	Color [DarkGray]	1	4					0.0057143	2.9039	90159000	5	0.397283	-0.0145769	0.0513118	0.0566362	0.0738798	0.103005	0.0628252	0.0597281
+	29.3457	5.74522	sp|P12863|TPIS_MAIZE	sp|P12863|TPIS_MAIZE	Color [DarkGray]	1	4				+	0	323.31	37767000000	142	5.74522	29.3457	43.8636	45.9998	45.1198	16.0496	15.0692	15.8273
+	4.2476	2.65502	sp|P13689|ABP1_MAIZE	sp|P13689|ABP1_MAIZE	Color [DarkGray]	1	4				+	0	194.17	4079800000	32	2.65502	4.2476	6.69187	4.72196	5.25746	1.32836	1.03086	1.56926
+	75.2133	3.24556	sp|P14641|TBA2_MAIZE;sp|P14640|TBA1_MAIZE;sp|P33626|TBA4_MAIZE	sp|P14641|TBA2_MAIZE;sp|P14640|TBA1_MAIZE	Color [DarkGray]	1	4				+	0	323.31	126890000000	319	3.24556	75.2133	127.661	134.501	152.415	61.1194	61.7499	66.0676
+	-4.90672	4.45635	sp|P15719|MDHP_MAIZE	sp|P15719|MDHP_MAIZE	Color [DarkGray]	1	4				+	0	281.73	5053100000	48	4.45635	-4.90672	1.43964	0.991334	1.07948	6.44923	6.01469	5.76668
+	0.571638	2.48966	sp|P16166|UFOG1_MAIZE;sp|P16165|UFOG2_MAIZE;sp|P16167|UFOG3_MAIZE	sp|P16166|UFOG1_MAIZE;sp|P16165|UFOG2_MAIZE;sp|P16167|UFOG3_MAIZE	Color [DarkGray]	1	4				+	0	36.339	611090000	8	2.48966	0.571638	0.620095	0.784023	0.920816	0.153805	0.215294	0.240922
+	-3.93658	2.85552	sp|P16243|MAOC_MAIZE	sp|P16243|MAOC_MAIZE	Color [DarkGray]	1	4				+	0	262.28	4218000000	48	2.85552	-3.93658	1.08906	1.13264	0.948508	5.89604	4.18677	4.89715
+	-0.152176	2.02129	sp|P17788|RK2_MAIZE	sp|P17788|RK2_MAIZE	Color [DarkGray]	1	4				+	0	63.517	254450000	5	2.02129	-0.152176	0.0513545	0.114299	0.155558	0.268747	0.273593	0.2354
	0.0025842	0.0262596	sp|P17847|NIR_MAIZE	sp|P17847|NIR_MAIZE	Color [DarkGray]	1	4					0.002994	3.3674	25729000	1	0.0262596	0.0025842	0.0737528	0	0	0.0660002	0	0
+	1.42908	1.66059	sp|P18025|TBB1_MAIZE	sp|P18025|TBB1_MAIZE	Color [DarkGray]	1	4				+	0	86.877	4947200000	30	1.66059	1.42908	4.20176	4.3769	5.08382	2.62724	3.61259	3.13541
+	0.58513	2.24331	sp|P18026|TBB2_MAIZE	sp|P18026|TBB2_MAIZE	Color [DarkGray]	1	4				+	0	26.299	902370000	14	2.24331	0.58513	0.998196	1.19014	0.826564	0.389877	0.473975	0.395657
	1.39746	0.811082	sp|P18122|CATA1_MAIZE	sp|P18122|CATA1_MAIZE	Color [DarkGray]	1	4					0	287.41	10128000000	87	0.811082	1.39746	8.77066	7.19588	9.77697	7.59341	6.6815	7.27623
+	-16.7528	3.39059	sp|P18123|CATA3_MAIZE	sp|P18123|CATA3_MAIZE	Color [DarkGray]	1	4				+	0	323.31	15369000000	129	3.39059	-16.7528	1.26151	2.87887	3.22787	20.8556	16.3871	20.3841
+	41.2112	1.67783	sp|P19023|ATPBM_MAIZE	sp|P19023|ATPBM_MAIZE	Color [DarkGray]	1	4				+	0	323.31	94414000000	262	1.67783	41.2112	115.379	78.1536	96.3776	54.6467	50.6154	61.0142
+	-0.448291	5.01357	sp|P19124|NDHJ_MAIZE	sp|P19124|NDHJ_MAIZE	Color [DarkGray]	1	4				+	0	18.813	324050000	7	5.01357	-0.448291	0	0	0	0.479849	0.437267	0.427757
+	6.94617	4.36798	sp|P19656|NLTP_MAIZE	sp|P19656|NLTP_MAIZE	Color [DarkGray]	1	4				+	0	167.83	6896000000	35	4.36798	6.94617	8.96653	8.68079	9.69963	1.78095	2.39418	2.33331
+	-0.117454	1.71478	sp|P19862|PHYA1_MAIZE	sp|P19862|PHYA1_MAIZE	Color [DarkGray]	1	4				+	0	16.152	90174000	6	1.71478	-0.117454	0.0161673	0	0	0.176079	0.0703401	0.122111
+	6.73694	4.32392	sp|P19950|RS141_MAIZE	sp|P19950|RS141_MAIZE	Color [DarkGray]	1	4				+	0	187.61	11753000000	87	4.32392	6.73694	13.0702	12.0791	13.1	6.11866	5.75868	6.16118
	-0.00497973	0.262621	sp|P19951|RS142_MAIZE	sp|P19951|RS142_MAIZE	Color [DarkGray]	1	4					0	4.6198	69653000	0	0.262621	-0.00497973	0.0580685	0.0363016	0.0597894	0.0565662	0.0558617	0.0566709
+	39.1599	4.21094	sp|P21569|CYPH_MAIZE	sp|P21569|CYPH_MAIZE	Color [DarkGray]	1	4				+	0	143.39	49800000000	126	4.21094	39.1599	58.908	57.1658	63.1773	17.9439	21.6475	22.1799
+	6.44529	2.73435	sp|P22275|TBA3_MAIZE	sp|P22275|TBA3_MAIZE	Color [DarkGray]	1	4				+	0	257.6	13149000000	62	2.73435	6.44529	12.4554	13.4633	14.8114	7.07718	6.19941	8.11761
+	0.177072	2.10762	sp|P23111|CDC2_MAIZE	sp|P23111|CDC2_MAIZE	Color [DarkGray]	1	4				+	0	10.951	175120000	3	2.10762	0.177072	0.26337	0.193729	0.245749	0	0.095055	0.0765773
+	-0.443589	2.02573	sp|P23225|GLTB_MAIZE	sp|P23225|GLTB_MAIZE	Color [DarkGray]	1	4				+	0	130.6	1507100000	30	2.02573	-0.443589	0.89334	0.903306	0.930246	1.32475	1.2053	1.52761
+	-1.24632	3.76556	sp|P23345|SODC4_MAIZE	sp|P23345|SODC4_MAIZE	Color [DarkGray]	1	4				+	0	4.5597	897700000	3	3.76556	-1.24632	0	0	0	1.36927	1.06639	1.3033
+	7.73065	2.16737	sp|P23346|SODC5_MAIZE	sp|P23346|SODC5_MAIZE	Color [DarkGray]	1	4				+	0	201.92	7273200000	34	2.16737	7.73065	6.79688	10.7362	11.4425	1.51293	1.50562	2.76508
	3.00835	0.829115	sp|P23444|H1_MAIZE	sp|P23444|H1_MAIZE	Color [DarkGray]	1	4					0	14.362	2616200000	14	0.829115	3.00835	7.09974	2.04012	2.54032	1.85958	0.345544	0.450006
+	21.3031	3.63248	sp|P24067|BIP2_MAIZE	sp|P24067|BIP2_MAIZE	Color [DarkGray]	1	4				+	0	323.31	59300000000	281	3.63248	21.3031	56.3749	56.0544	58.8015	32.9426	37.8196	36.5596
+	0.528337	2.02728	sp|P24631|HSP21_MAIZE	sp|P24631|HSP21_MAIZE	Color [DarkGray]	1	4				+	0	23.276	816960000	11	2.02728	0.528337	0.799529	1.05633	0.868127	0.430285	0.218327	0.490365
	-0.233365	0.477958	sp|P24632|HSP22_MAIZE	sp|P24632|HSP22_MAIZE	Color [DarkGray]	1	4	+				1	-2	453490000	3	0.477958	-0.233365	0.197334	0.223576	0.228221	0.0349218	0.583391	0.730914
+	-1.15967	2.61454	sp|P24993|PSBH_MAIZE	sp|P24993|PSBH_MAIZE	Color [DarkGray]	1	4				+	0	53.644	1350800000	10	2.61454	-1.15967	0.42508	0.350233	0.424534	1.68863	1.22558	1.76465
	-0.635988	0.654809	sp|P25242|POLG_SUMVS	sp|P25242|POLG_SUMVS	Color [DarkGray]	1	4					0.0030211	3.4106	514760000	3	0.654809	-0.635988	0.13861	0	0	1.49655	0.55003	0
	-0.0124421	0.155549	sp|P25459|RR18_MAIZE	sp|P25459|RR18_MAIZE	Color [DarkGray]	1	4					0.0083102	2.5812	24597000	2	0.155549	-0.0124421	0.0420227	0	0	0.0793489	0	0
+	15.3647	3.41197	sp|P25460|RS11_MAIZE	sp|P25460|RS11_MAIZE	Color [DarkGray]	1	4				+	0	129.57	25331000000	106	3.41197	15.3647	26.3031	27.2785	29.8763	13.6743	10.6961	12.9936
	0.0564632	0.157754	sp|P25462|GLNAC_MAIZE	sp|P25462|GLNAC_MAIZE	Color [DarkGray]	1	4					0	42.781	474210000	9	0.157754	0.0564632	0.669607	0.275313	0.289532	0.284272	0.376356	0.404434
+	-0.26879	1.45777	sp|P25709|NDHH_MAIZE	sp|P25709|NDHH_MAIZE	Color [DarkGray]	1	4				+	0	7.3587	192980000	2	1.45777	-0.26879	0	0	0	0.437299	0.158298	0.210774
+	-10.8745	3.76206	sp|P26216|PGLR1_MAIZE	sp|P26216|PGLR1_MAIZE	Color [DarkGray]	1	4				+	0	118.19	7859300000	56	3.76206	-10.8745	0	0.0315078	0	12.3999	9.66069	10.5945
+	34.7603	2.84473	sp|P26301|ENO1_MAIZE	sp|P26301|ENO1_MAIZE	Color [DarkGray]	1	4				+	0	323.31	64767000000	299	2.84473	34.7603	74.1063	60.5802	73.1963	35.0146	33.0101	35.577
	-0.0501538	0.577459	sp|P26566|RK20_MAIZE	sp|P26566|RK20_MAIZE	Color [DarkGray]	1	4					0.0029586	3.235	158390000	3	0.577459	-0.0501538	0.0347366	0.104153	0.132976	0.184727	0.0966384	0.14096
+	8.7694	1.54172	sp|P27347|MNB1B_MAIZE	sp|P27347|MNB1B_MAIZE	Color [DarkGray]	1	4				+	0	188.63	15829000000	81	1.54172	8.7694	12.9671	16.3032	21.0982	10.2182	6.37271	7.46936
+	-5.13107	1.27017	sp|P27497|CB29_MAIZE	sp|P27497|CB29_MAIZE	Color [DarkGray]	1	4					0	63.036	6583400000	44	1.27017	-5.13107	3.65178	1.43998	1.86149	10.9155	5.09659	6.33439
	-0.0205582	0.587948	sp|P27787|FER1_MAIZE	sp|P27787|FER1_MAIZE	Color [DarkGray]	1	4					0	3.9454	24689000	1	0.587948	-0.0205582	0	0.0194555	0	0	0.0480789	0.0330511
	0.104112	0.700687	sp|P27788|FER3_MAIZE	sp|P27788|FER3_MAIZE	Color [DarkGray]	1	4					0	94.548	638340000	12	0.700687	0.104112	0.637649	0.462245	0.560323	0.538654	0.397093	0.412133
+	21.2006	2.92664	sp|P27923|RS27A_MAIZE	sp|P27923|RS27A_MAIZE	Color [DarkGray]	1	4				+	0	137.47	27947000000	154	2.92664	21.2006	31.2463	30.2672	37.8016	10.4501	11.4071	13.8561
	0.588145	0.210726	sp|P28516|PDC1_MAIZE;sp|Q05326|PDC2_MAIZE	sp|P28516|PDC1_MAIZE;sp|Q05326|PDC2_MAIZE	Color [DarkGray]	1	4					0	40.863	836910000	13	0.210726	0.588145	3.05607	0	0.260044	1.44123	0.0491857	0.0612697
	0.136197	0.876785	sp|P28523|CSK2A_MAIZE	sp|P28523|CSK2A_MAIZE	Color [DarkGray]	1	4					0	8.8153	166270000	4	0.876785	0.136197	0.0706314	0.230978	0.285161	0.113637	0	0.0645434
+	-7.34891	4.09256	sp|P29022|CHIA_MAIZE;sp|P29023|CHIB_MAIZE	sp|P29022|CHIA_MAIZE	Color [DarkGray]	1	4				+	0	323.31	7683400000	46	4.09256	-7.34891	2.44012	1.09051	2.08652	9.58732	8.93007	9.14649
+	1.24482	1.25024	sp|P29036|FRI1_MAIZE	sp|P29036|FRI1_MAIZE	Color [DarkGray]	1	4					0	100.94	5308700000	37	1.25024	1.24482	3.97379	4.65937	5.51192	3.43577	3.24095	3.7339
	0.806528	0.584146	sp|P29038|LDH_MAIZE	sp|P29038|LDH_MAIZE	Color [DarkGray]	1	4					0	34.481	3353400000	31	0.584146	0.806528	2.14432	3.29345	3.46986	2.05755	1.43315	2.99736
+	23.6692	3.52012	sp|P29185|CH61_MAIZE	sp|P29185|CH61_MAIZE	Color [DarkGray]	1	4				+	0	323.31	30313000000	195	3.52012	23.6692	39.1444	32.6071	37.8146	13.4458	12.6548	12.4579
	-0.0796566	0.250322	sp|P29306|1433X_MAIZE	sp|P29306|1433X_MAIZE	Color [DarkGray]	1	4					0	49.955	908240000	8	0.250322	-0.0796566	0.482434	0.670157	0.770083	0.533739	0.799385	0.828519
+	0.0550254	1.63207	sp|P29390|FRI2_MAIZE	sp|P29390|FRI2_MAIZE	Color [DarkGray]	1	4				+	0	24.099	214370000	4	1.63207	0.0550254	0.168889	0.203763	0.206027	0.129783	0.126765	0.157056
	0.0481597	0.427243	sp|P30756|H2B2_MAIZE	sp|P30756|H2B2_MAIZE	Color [DarkGray]	1	4	+				1	-2	19621000	1	0.427243	0.0481597	0.144479	0	0	0	0	0
+	27.5329	3.9853	sp|P30792|PMGI_MAIZE	sp|P30792|PMGI_MAIZE	Color [DarkGray]	1	4				+	0	323.31	39553000000	191	3.9853	27.5329	47.9541	42.2805	46.8471	18.713	17.3355	18.4346
+	-0.51825	2.72067	sp|P31726|CYT1_MAIZE	sp|P31726|CYT1_MAIZE	Color [DarkGray]	1	4				+	0	16.73	448360000	10	2.72067	-0.51825	0.0657553	0.061531	0.0364145	0.590948	0.685204	0.442299
	-0.0253096	0.292013	sp|P31927|SPSA_MAIZE	sp|P31927|SPSA_MAIZE	Color [DarkGray]	1	4					0	5.6142	85468000	3	0.292013	-0.0253096	0.114944	0.0167401	0.0361845	0.11664	0.0566258	0.0705322
	0.0148055	0.143836	sp|P33521|MVP_MSTV	sp|P33521|MVP_MSTV	Color [DarkGray]	1	4					0.0083333	2.6227	93197000	3	0.143836	0.0148055	0	0.100116	0.124369	0.0554993	0.0583154	0.0662539
	0.304738	0.200899	sp|Q02245|TBA5_MAIZE;sp|P33627|TBA6_MAIZE	sp|Q02245|TBA5_MAIZE;sp|P33627|TBA6_MAIZE	Color [DarkGray]	1	4					0	136.12	3042000000	29	0.200899	0.304738	1.39781	2.70318	3.19075	1.65603	2.36645	2.35504
	0.0488368	0.155411	sp|P33679|ZEAM_MAIZE	sp|P33679|ZEAM_MAIZE	Color [DarkGray]	1	4					0	51.352	424470000	15	0.155411	0.0488368	0.451567	0.3012	0.323895	0.114724	0.328439	0.486987
+	-2.4261	4.10519	sp|P35081|PROF1_MAIZE	sp|P35081|PROF1_MAIZE	Color [DarkGray]	1	4				+	0	102.72	1755000000	11	4.10519	-2.4261	0	0	0	2.13256	2.56811	2.57762
+	-8.79962	2.88457	sp|P35082|PROF2_MAIZE;sp|A4KA57|PROF8_MAIZE	sp|P35082|PROF2_MAIZE;sp|A4KA57|PROF8_MAIZE	Color [DarkGray]	1	4				+	0	218.81	6550600000	33	2.88457	-8.79962	0	0.20394	0.219065	11.1247	7.94423	7.753
	-0.112479	0.427243	sp|P35083|PROF3_MAIZE;sp|A4KA55|PROF6_MAIZE	sp|P35083|PROF3_MAIZE;sp|A4KA55|PROF6_MAIZE	Color [DarkGray]	1	4					0.0057471	3.0346	80335000	1	0.427243	-0.112479	0	0	0	0.337436	0	0
	-0.0200273	0.427243	sp|P35338|PGLR2_MAIZE	sp|P35338|PGLR2_MAIZE	Color [DarkGray]	1	4					0	5.3235	14304000	1	0.427243	-0.0200273	0	0	0	0.0600819	0	0
+	-0.159485	4.78735	sp|P35339|PGLR3_MAIZE	sp|P35339|PGLR3_MAIZE	Color [DarkGray]	1	4				+	0	3.7281	115290000	2	4.78735	-0.159485	0	0	0	0.146798	0.163414	0.168241
+	-0.155909	3.93447	sp|P38559|GLNA1_MAIZE	sp|P38559|GLNA1_MAIZE	Color [DarkGray]	1	4				+	0	36.693	112730000	3	3.93447	-0.155909	0	0	0	0.135352	0.163205	0.169168
	0.661961	0.708579	sp|P38560|GLNA2_MAIZE	sp|P38560|GLNA2_MAIZE	Color [DarkGray]	1	4					0	28.561	1316200000	22	0.708579	0.661961	0.474452	1.80866	1.65378	0.783535	0.581579	0.585892
	-0.0700414	0.0686534	sp|P38561|GLNA3_MAIZE	sp|P38561|GLNA3_MAIZE	Color [DarkGray]	1	4					0	12.922	1712500000	18	0.0686534	-0.0700414	1.48956	1.24912	1.11576	2.03033	0.962524	1.07171
	3.01478	0.766362	sp|P38562|GLNA4_MAIZE	sp|P38562|GLNA4_MAIZE	Color [DarkGray]	1	4					0	323.31	15319000000	113	0.766362	3.01478	10.9679	13.0392	15.7814	7.93867	11.3224	11.4831
+	-0.203681	1.55649	sp|P38563|GLNA5_MAIZE	sp|P38563|GLNA5_MAIZE	Color [DarkGray]	1	4				+	0	9.8173	146860000	7	1.55649	-0.203681	0	0	0	0.323957	0.149814	0.137271
+	56.1825	3.6025	sp|P40280|H2A_MAIZE	sp|P40280|H2A_MAIZE	Color [DarkGray]	1	4				+	0	48.024	77397000000	38	3.6025	56.1825	89.4002	83.7747	98.1339	32.3923	32.4488	37.9201
	2.99482	0.546536	sp|P41040|CALM_MAIZE	sp|P41040|CALM_MAIZE	Color [DarkGray]	1	4					0	323.31	18026000000	65	0.546536	2.99482	19.6083	12.6982	14.9326	10.3812	12.9538	14.9197
	0.71151	0.427243	sp|P41376|IF4A1_ARATH	sp|P41376|IF4A1_ARATH	Color [DarkGray]	1	4	+				1	-2	289880000	2	0.427243	0.71151	2.13453	0	0	0	0	0
	0	0	sp|P41377|IF4A2_ARATH	sp|P41377|IF4A2_ARATH	Color [DarkGray]	1	4					0.0030488	3.4783	0	1	0	0	0	0	0	0	0	0
	0.0611697	0.121536	sp|P41980|SODM4_MAIZE;sp|P41978|SODM2_MAIZE	sp|P41980|SODM4_MAIZE;sp|P41978|SODM2_MAIZE	Color [DarkGray]	1	4					0	67.682	842420000	12	0.121536	0.0611697	0.34942	0.732427	0.889282	0.49896	0.775084	0.513576
+	0.642536	1.81918	sp|P42057|VDAC_MAIZE	sp|P42057|VDAC_MAIZE	Color [DarkGray]	1	4				+	0	48.99	957160000	9	1.81918	0.642536	0.822577	1.11162	1.28969	0.355774	0.349199	0.591305
	0.427107	0.427243	sp|P42390|TRPA_MAIZE	sp|P42390|TRPA_MAIZE	Color [DarkGray]	1	4	+				1	-2	174010000	1	0.427243	0.427107	1.28132	0	0	0	0	0
+	1.10263	1.49741	sp|P42856|ZB14_MAIZE	sp|P42856|ZB14_MAIZE	Color [DarkGray]	1	4				+	0	11.33	1606500000	17	1.49741	1.10263	2.53879	1.39905	1.72807	0.806511	0.712263	0.839259
+	22.6725	2.57894	sp|P42895|ENO2_MAIZE	sp|P42895|ENO2_MAIZE	Color [DarkGray]	1	4				+	0	323.31	32728000000	160	2.57894	22.6725	38.7534	32.1501	42.3885	12.3856	17.9645	14.9244
+	-0.998882	2.69544	sp|P43188|KADC_MAIZE	sp|P43188|KADC_MAIZE	Color [DarkGray]	1	4				+	0	15.908	1043500000	16	2.69544	-0.998882	0.07404	0.290206	0.342201	1.01199	1.31216	1.37895
	-0.0168556	0.113388	sp|P43283|TRPB1_MAIZE;sp|Q59992|TRPB_SYNY3	sp|P43283|TRPB1_MAIZE	Color [DarkGray]	1	4					0	23.551	102970000	4	0.113388	-0.0168556	0	0.0817124	0.114759	0	0.111365	0.135673
+	-0.690303	2.27402	sp|P43284|TRPB2_MAIZE	sp|P43284|TRPB2_MAIZE	Color [DarkGray]	1	4				+	0	20.636	1152600000	11	2.27402	-0.690303	0.274607	0.543412	0.643	1.06059	1.2094	1.26194
+	8.50725	1.60169	sp|P45633|RL10_MAIZE	sp|P45633|RL10_MAIZE	Color [DarkGray]	1	4				+	0	119.52	17758000000	104	1.60169	8.50725	16.0878	16.4464	22.2253	12.4721	7.79929	8.96635
	-0.177907	0.744177	sp|P46251|ADF1_MAIZE;sp|Q43694|ADF2_MAIZE	sp|P46251|ADF1_MAIZE;sp|Q43694|ADF2_MAIZE	Color [DarkGray]	1	4					0	7.7786	127650000	5	0.744177	-0.177907	0	0	0	0.397341	0.0680163	0.0683627
+	2.74568	2.38508	sp|P46252|RLA2A_MAIZE	sp|P46252|RLA2A_MAIZE	Color [DarkGray]	1	4				+	0	49.94	4716700000	32	2.38508	2.74568	5.84132	4.42866	5.26245	2.08875	2.84078	2.36587
	0.0742295	0.118156	sp|P46302|RS28_MAIZE	sp|P46302|RS28_MAIZE	Color [DarkGray]	1	4					0.003012	3.4092	162610000	3	0.118156	0.0742295	0.583616	0	0	0	0	0.360928
+	-0.083674	0.93639	sp|P46420|GSTF4_MAIZE	sp|P46420|GSTF4_MAIZE	Color [DarkGray]	1	4					0.0030769	3.5289	141470000	2	0.93639	-0.083674	0	0.104429	0.0678026	0.087296	0.15185	0.184108
+	-1.9533	2.93312	sp|P46617|CYF_MAIZE	sp|P46617|CYF_MAIZE	Color [DarkGray]	1	4				+	0	96.841	2422000000	39	2.93312	-1.9533	0.798719	0.679064	0.842281	3.0792	2.80919	2.29156
+	-3.75667	2.93833	sp|P48183|PSBA_MAIZE	sp|P48183|PSBA_MAIZE	Color [DarkGray]	1	4				+	0	71.469	3904100000	34	2.93833	-3.75667	0.63737	1.00867	1.02654	3.79187	4.9422	5.2085
+	-5.59636	3.35357	sp|P48184|PSBD_MAIZE	sp|P48184|PSBD_MAIZE	Color [DarkGray]	1	4				+	0	75.677	5439400000	29	3.35357	-5.59636	1.29178	0.915583	1.03343	5.65452	7.08482	7.29052
+	-0.421001	5.80491	sp|P48186|ATPF_MAIZE	sp|P48186|ATPF_MAIZE	Color [DarkGray]	1	4				+	0	19.491	304730000	6	5.80491	-0.421001	0	0	0	0.419095	0.43837	0.405539
+	-2.60383	0.941472	sp|P48187|PSBC_MAIZE	sp|P48187|PSBC_MAIZE	Color [DarkGray]	1	4					0	75.571	3965900000	28	0.941472	-2.60383	1.72622	1.46004	1.65637	6.79744	2.82235	3.03434
+	181.602	2.86714	sp|P49036|SUS2_MAIZE	sp|P49036|SUS2_MAIZE	Color [DarkGray]	1	4				+	0	323.31	182310000000	488	2.86714	181.602	281.75	205.433	242.012	73.4138	53.8687	57.1039
+	4.93102	2.18543	sp|P49076|ARF_MAIZE	sp|P49076|ARF_MAIZE	Color [DarkGray]	1	4				+	0	151.31	10780000000	81	2.18543	4.93102	9.80597	10.8686	12.0347	4.59519	6.84771	6.47339
+	0.812997	2.98601	sp|P49079|AKH1_MAIZE	sp|P49079|AKH1_MAIZE	Color [DarkGray]	1	4				+	0	32.003	1385800000	21	2.98601	0.812997	1.41445	1.64721	1.43279	0.567678	0.754012	0.733772
+	0.247271	1.01399	sp|P49080|AKH2_MAIZE	sp|P49080|AKH2_MAIZE	Color [DarkGray]	1	4					0	6.1127	275680000	3	1.01399	0.247271	0.384006	0.149181	0.535076	0.0662564	0.141216	0.11898
+	-0.197872	2.06846	sp|P49081|MASY_MAIZE	sp|P49081|MASY_MAIZE	Color [DarkGray]	1	4				+	0	20.253	142510000	6	2.06846	-0.197872	0	0	0	0.127351	0.196632	0.269632
+	23.3749	4.37502	sp|P49087|VATA_MAIZE	sp|P49087|VATA_MAIZE	Color [DarkGray]	1	4				+	0	323.31	34829000000	188	4.37502	23.3749	41.7687	37.8418	39.4801	15.6955	17.0819	16.1885
	-0.028037	0.226462	sp|P49094|ASNS_MAIZE	sp|P49094|ASNS_MAIZE	Color [DarkGray]	1	4					0	24.327	276750000	8	0.226462	-0.028037	0.107124	0.214897	0.251422	0.262497	0.197145	0.197913
+	0.160754	1.56271	sp|P49101|CDPK2_MAIZE	sp|P49101|CDPK2_MAIZE	Color [DarkGray]	1	4				+	0	6.9216	326260000	7	1.56271	0.160754	0.292139	0.325879	0.387945	0.129178	0.250312	0.144212
+	1.01818	1.7773	sp|P49104|RAB2B_MAIZE;sp|P49103|RAB2A_MAIZE	sp|P49104|RAB2B_MAIZE;sp|P49103|RAB2A_MAIZE	Color [DarkGray]	1	4				+	0	37.504	2007700000	26	1.7773	1.01818	2.33364	1.88032	2.11621	0.888796	1.53422	0.852596
	0.28398	0.287499	sp|P49105|G6PI_MAIZE	sp|P49105|G6PI_MAIZE	Color [DarkGray]	1	4					0	124.26	3173600000	49	0.287499	0.28398	3.40245	2.09068	2.43434	2.45901	2.22423	2.39228
+	18.3189	2.68659	sp|P49106|14331_MAIZE	sp|P49106|14331_MAIZE	Color [DarkGray]	1	4				+	0	323.31	30818000000	158	2.68659	18.3189	37.4898	29.8535	34.6662	18.1955	14.9054	13.9519
+	-0.17931	1.98244	sp|P49133|TPT_MAIZE	sp|P49133|TPT_MAIZE	Color [DarkGray]	1	4				+	0	3.9086	167510000	3	1.98244	-0.17931	0.102102	0	0	0.246313	0.177684	0.216035
+	-0.0656845	1.32305	sp|P49174|INVA_MAIZE	sp|P49174|INVA_MAIZE	Color [DarkGray]	1	4				+	0	6.2388	91751000	4	1.32305	-0.0656845	0.033727	0.0281572	0.03976	0.0535713	0.122968	0.122158
	0.115778	0.90501	sp|P49175|INV1_MAIZE	sp|P49175|INV1_MAIZE	Color [DarkGray]	1	4					0	10.888	252360000	2	0.90501	0.115778	0.268606	0.217742	0.291074	0.254432	0.0929636	0.0826917
+	0.0675029	5.46227	sp|P49178|GBB_MAIZE	sp|P49178|GBB_MAIZE	Color [DarkGray]	1	4				+	0	3.8102	39607000	2	5.46227	0.0675029	0.065167	0.0661611	0.0711805	0	0	0
+	50.8031	1.8835	sp|P49235|HGGL1_MAIZE	sp|P49235|HGGL1_MAIZE	Color [DarkGray]	1	4				+	0	323.31	28617000000	111	1.8835	50.8031	74.791	34.9627	45.3453	0.441794	1.42886	0.819166
+	0.657837	1.8047	sp|P49249|IN22_MAIZE	sp|P49249|IN22_MAIZE	Color [DarkGray]	1	4				+	0	79.066	1218200000	18	1.8047	0.657837	1.60465	1.12927	1.20741	0.575575	0.795841	0.596414
	0.578362	0.6914	sp|P49353|FPPS_MAIZE	sp|P49353|FPPS_MAIZE	Color [DarkGray]	1	4					0	15.959	570080000	9	0.6914	0.578362	1.54803	0.423849	0.446248	0.393519	0.184431	0.105088
	0.186904	0.203067	sp|P49727|UCRI_MAIZE	sp|P49727|UCRI_MAIZE	Color [DarkGray]	1	4					0	51.546	3548900000	24	0.203067	0.186904	3.01749	2.171	3.35605	2.60586	2.74791	2.63006
+	1.73493	1.65042	sp|P51059|CAPP2_MAIZE	sp|P51059|CAPP2_MAIZE	Color [DarkGray]	1	4				+	0	93.857	4557800000	64	1.65042	1.73493	5.23191	4.48082	3.73027	3.15422	2.51817	2.56584
	0.618903	0.346409	sp|P51108|DFRA_MAIZE	sp|P51108|DFRA_MAIZE	Color [DarkGray]	1	4					0.0057637	3.0394	487090000	3	0.346409	0.618903	2.24263	0.0874619	0.109545	0.582926	0	0
+	3.04499	1.5964	sp|P51421|RL32_MAIZE	sp|P51421|RL32_MAIZE	Color [DarkGray]	1	4				+	0	42.122	4417200000	25	1.5964	3.04499	3.37248	5.34184	6.18601	1.41846	2.02859	2.31832
+	1.72873	2.38251	sp|P51425|RL39_MAIZE	sp|P51425|RL39_MAIZE	Color [DarkGray]	1	4				+	0	4.1515	1468500000	5	2.38251	1.72873	2.68937	1.74454	1.9267	0.311053	0.387136	0.476248
+	-1.37143	1.04255	sp|P52580|IFRH_MAIZE	sp|P52580|IFRH_MAIZE	Color [DarkGray]	1	4					0	40.47	2950200000	33	1.04255	-1.37143	1.35201	1.4612	1.68546	1.91284	2.69584	4.00429
+	34.9682	1.8968	sp|P52588|PDI_MAIZE	sp|P52588|PDI_MAIZE	Color [DarkGray]	1	4				+	0	323.31	32304000000	184	1.8968	34.9682	60.5022	34.0038	41.1386	13.8167	7.37943	9.54402
	0.912934	0.500141	sp|P52855|RLA1_MAIZE	sp|P52855|RLA1_MAIZE	Color [DarkGray]	1	4					0	15.651	1367600000	7	0.500141	0.912934	3.02308	1.30709	0.568656	1.37507	0.377786	0.407175
+	116.757	1.31057	sp|P54348|H2B5_MAIZE;sp|P49120|H2B4_MAIZE;sp|P30755|H2B1_MAIZE;sp|Q43261|H2B3_MAIZE	sp|P54348|H2B5_MAIZE;sp|P49120|H2B4_MAIZE;sp|P30755|H2B1_MAIZE;sp|Q43261|H2B3_MAIZE	Color [DarkGray]	1	4				+	0	192.38	122690000000	52	1.31057	116.757	247.09	114.729	131.04	46.2081	44.4633	51.9162
+	-1.05821	3.16068	sp|P55005|AMYB_MAIZE	sp|P55005|AMYB_MAIZE	Color [DarkGray]	1	4				+	0	62.787	1137400000	24	3.16068	-1.05821	0.477457	0.254903	0.158328	1.4185	1.23634	1.41047
	0.0466868	0.0507429	sp|P55234|GLGL2_MAIZE;sp|P55241|GLGL1_MAIZE	sp|P55234|GLGL2_MAIZE	Color [DarkGray]	1	4					0	117.74	2553900000	46	0.0507429	0.0466868	2.448	1.73836	1.82342	1.69291	2.4006	1.77621
+	-0.398727	1.55138	sp|P55240|GLGS_MAIZE	sp|P55240|GLGS_MAIZE	Color [DarkGray]	1	4				+	0	21.068	1020600000	13	1.55138	-0.398727	0.529067	0.513601	0.646742	0.925087	0.791233	1.16927
	0.156464	0.519777	sp|P55876|IF5_MAIZE	sp|P55876|IF5_MAIZE	Color [DarkGray]	1	4					0	21.864	506610000	12	0.519777	0.156464	0.280424	0.434922	0.678126	0.191528	0.411666	0.320885
+	0.262787	1.21678	sp|P56330|SUI1_MAIZE	sp|P56330|SUI1_MAIZE	Color [DarkGray]	1	4					0	13.995	400100000	9	1.21678	0.262787	0.241891	0.500161	0.575691	0.173416	0.162299	0.193665
	0.295569	0.880846	sp|P56521|HDA19_MAIZE	sp|P56521|HDA19_MAIZE	Color [DarkGray]	1	4					0	5.5458	322360000	5	0.880846	0.295569	0.0798203	0.526119	0.561321	0.0533697	0.118443	0.108743
+	-3.18621	3.8356	sp|P58738|EXPB1_MAIZE	sp|P58738|EXPB1_MAIZE	Color [DarkGray]	1	4				+	0	86.958	2476200000	29	3.8356	-3.18621	0.392556	0.0455665	0	2.95877	3.56419	3.47378
	-0.0047457	0.427243	sp|P60138|PSBL_MAIZE	sp|P60138|PSBL_MAIZE	Color [DarkGray]	1	4					0.0029674	3.2408	3389500	1	0.427243	-0.0047457	0	0	0	0.0142371	0	0
+	65.7109	1.74644	sp|Q41811|H43_MAIZE;sp|P62787|H4_MAIZE	sp|Q41811|H43_MAIZE;sp|P62787|H4_MAIZE	Color [DarkGray]	1	4				+	0	156.71	91926000000	114	1.74644	65.7109	139.641	85.8329	101.746	52.8741	33.0318	44.1822
+	31.8094	3.10118	sp|P69246|H32_MAIZE	sp|P69246|H32_MAIZE	Color [DarkGray]	1	4				+	0	24.748	45420000000	37	3.10118	31.8094	53.5938	48.4312	55.6382	25.4218	15.944	20.8691
+	-1.38964	4.73766	sp|P69388|PSBE_MAIZE	sp|P69388|PSBE_MAIZE	Color [DarkGray]	1	4				+	0	29.798	1119000000	11	4.73766	-1.38964	0	0.176364	0.0645245	1.42711	1.46242	1.52029
+	25.6201	1.43634	sp|P80607|RGP1_MAIZE	sp|P80607|RGP1_MAIZE	Color [DarkGray]	1	4				+	0	285.78	31640000000	117	1.43634	25.6201	55.8543	29.5418	33.1559	15.8286	13.3224	12.5406
+	4.05287	1.67043	sp|P80608|CYSK_MAIZE	sp|P80608|CYSK_MAIZE	Color [DarkGray]	1	4				+	0	200.2	9319200000	90	1.67043	4.05287	11.6704	8.01516	8.89432	5.50373	5.33882	5.57875
	0.0261569	0.0131594	sp|P80609|UC03_MAIZE	sp|P80609|UC03_MAIZE	Color [DarkGray]	1	4					0	4.8578	2451700000	7	0.0131594	0.0261569	3.06137	1.34946	1.49401	2.66614	1.553	1.60724
+	1.9288	1.48736	sp|P80610|UC04_MAIZE	sp|P80610|UC04_MAIZE	Color [DarkGray]	1	4				+	0	7.1309	2667600000	18	1.48736	1.9288	1.92312	3.33895	3.8559	0.810921	1.14248	1.37817
	2.72751	0.616172	sp|P80639|IF5A_MAIZE	sp|P80639|IF5A_MAIZE	Color [DarkGray]	1	4					0	251.22	18400000000	94	0.616172	2.72751	18.1194	12.8788	16.4859	12.4259	11.3578	15.5177
	0.526972	0.455935	sp|P93008|RH21_ARATH	sp|P93008|RH21_ARATH	Color [DarkGray]	1	4					0.0029851	3.3459	426400000	0	0.455935	0.526972	1.65973	0.179807	0.214704	0.364297	0.0540735	0.054956
+	3.04016	1.68271	sp|P93629|ADHX_MAIZE	sp|P93629|ADHX_MAIZE	Color [DarkGray]	1	4				+	0	147.48	5182600000	46	1.68271	3.04016	7.35319	4.86158	5.05189	3.06584	2.4657	2.61464
	0.23535	0.321253	sp|P93648|LONM_MAIZE	sp|P93648|LONM_MAIZE	Color [DarkGray]	1	4					0	60.898	1297000000	23	0.321253	0.23535	0.493605	1.32992	1.42965	0.840912	0.772209	0.934006
+	-0.251506	1.25234	sp|P93703|C71C3_MAIZE	sp|P93703|C71C3_MAIZE	Color [DarkGray]	1	4					0	16.048	303110000	8	1.25234	-0.251506	0.0217724	0.111451	0.131434	0.164347	0.413872	0.440956
+	16.0023	2.6424	sp|P93804|PGMC1_MAIZE	sp|P93804|PGMC1_MAIZE	Color [DarkGray]	1	4				+	0	323.31	30881000000	231	2.6424	16.0023	36.5391	28.7855	33.0326	17.8734	16.0448	16.4322
+	2.94052	3.60335	sp|P93805|PGMC2_MAIZE	sp|P93805|PGMC2_MAIZE	Color [DarkGray]	1	4				+	0	169.2	3927800000	40	3.60335	2.94052	5.0063	4.23648	4.7405	1.86286	1.59661	1.70225
	-2.87131	0.5108	sp|Q00008|PRMS_MAIZE	sp|Q00008|PRMS_MAIZE	Color [DarkGray]	1	4					0	26.559	2809000000	15	0.5108	-2.87131	2.01443	0	0	8.27512	0.955592	1.39765
+	1.03456	3.19909	sp|Q01526|14332_MAIZE	sp|Q01526|14332_MAIZE	Color [DarkGray]	1	4				+	0	37.276	2305200000	18	3.19909	1.03456	2.50145	2.17389	2.36299	1.31471	1.39412	1.22583
+	1.17488	2.08572	sp|Q05327|PDC3_MAIZE	sp|Q05327|PDC3_MAIZE	Color [DarkGray]	1	4				+	0	194.27	2049300000	25	2.08572	1.17488	2.10324	1.88369	2.67972	1.13061	1.02097	0.99043
+	3.66491	3.15912	sp|Q05737|YPTM2_MAIZE	sp|Q05737|YPTM2_MAIZE	Color [DarkGray]	1	4				+	0	27.236	6107700000	30	3.15912	3.66491	6.40256	6.33285	7.35406	2.80571	2.85228	3.43676
+	6.00872	3.50483	sp|Q05761|RS13_MAIZE	sp|Q05761|RS13_MAIZE	Color [DarkGray]	1	4				+	0	65.862	9111700000	68	3.50483	6.00872	10.9746	9.46798	10.6162	4.05561	4.14305	4.83393
+	-32.7979	4.6816	sp|Q06509|COMT1_MAIZE	sp|Q06509|COMT1_MAIZE	Color [DarkGray]	1	4				+	0	323.31	40482000000	152	4.6816	-32.7979	14.0724	11.0055	13.8165	47.6782	44.1718	45.438
+	-0.342305	2.58682	sp|Q07154|EXPB9_MAIZE	sp|Q07154|EXPB9_MAIZE	Color [DarkGray]	1	4				+	0	8.0627	247820000	5	2.58682	-0.342305	0	0	0	0.240122	0.390016	0.396778
+	-0.283859	1.13823	sp|Q08047|GLGB_MAIZE	sp|Q08047|GLGB_MAIZE	Color [DarkGray]	1	4					0	23.899	513410000	14	1.13823	-0.283859	0.260381	0.103362	0.362294	0.70503	0.449635	0.422951
+	46.2369	3.02083	sp|Q08062|MDHC_MAIZE	sp|Q08062|MDHC_MAIZE	Color [DarkGray]	1	4				+	0	323.31	74771000000	169	3.02083	46.2369	77.2652	78.944	91.7174	39.8916	31.0873	38.2371
+	1.25616	1.12429	sp|Q08066|RL19_MAIZE	sp|Q08066|RL19_MAIZE	Color [DarkGray]	1	4					0	22.901	2198400000	15	1.12429	1.25616	3.34038	1.83201	2.14175	1.58001	1.25623	0.709436
	0.467717	0.207944	sp|Q08068|RS20_MAIZE	sp|Q08068|RS20_MAIZE	Color [DarkGray]	1	4					0	34.952	2188100000	24	0.207944	0.467717	3.77622	1.13529	1.24823	1.75936	1.35552	1.64171
+	23.672	3.23912	sp|Q08069|RS8_MAIZE	sp|Q08069|RS8_MAIZE	Color [DarkGray]	1	4				+	0	172.31	38468000000	95	3.23912	23.672	43.5411	39.6806	44.5664	15.7463	22.1934	18.8326
+	4.51847	3.24878	sp|Q08275|HSP23_MAIZE	sp|Q08275|HSP23_MAIZE	Color [DarkGray]	1	4				+	0	134.91	3983600000	24	3.24878	4.51847	4.70012	5.58979	6.20497	0.749512	1.05792	1.13203
+	20.7133	2.79149	sp|Q08277|HSP82_MAIZE	sp|Q08277|HSP82_MAIZE	Color [DarkGray]	1	4				+	0	288.97	29226000000	105	2.79149	20.7133	38.14	29.0949	35.248	12.3096	14.1929	13.8406
+	1.29381	1.66866	sp|Q08704|CFI_MAIZE	sp|Q08704|CFI_MAIZE	Color [DarkGray]	1	4				+	0	53.942	1361700000	25	1.66866	1.29381	1.0331	1.9336	2.16835	0.37095	0.553812	0.328844
+	89.1125	3.21938	sp|Q09054|G3PC2_MAIZE	sp|Q09054|G3PC2_MAIZE	Color [DarkGray]	1	4				+	0	323.31	159110000000	260	3.21938	89.1125	170.215	158.49	185.211	73.5483	83.0934	89.9364
	0.245897	0.717634	sp|Q10716|CYSP1_MAIZE	sp|Q10716|CYSP1_MAIZE	Color [DarkGray]	1	4					0	74.703	1406800000	21	0.717634	0.245897	1.06852	1.16161	1.38195	0.718555	1.14626	1.00957
+	-1.69591	2.07446	sp|Q10717|CYSP2_MAIZE	sp|Q10717|CYSP2_MAIZE	Color [DarkGray]	1	4				+	0	109.15	3476800000	33	2.07446	-1.69591	1.39362	1.73263	1.95734	3.35008	3.94651	2.87472
	0.403528	0.736926	sp|Q10724|PPIM_MAIZE	sp|Q10724|PPIM_MAIZE	Color [DarkGray]	1	4					0	7.6214	649840000	15	0.736926	0.403528	0.204646	0.855521	1.00669	0.186836	0.34788	0.321552
+	-0.393676	3.28872	sp|Q195N6|PDRP1_MAIZE	sp|Q195N6|PDRP1_MAIZE	Color [DarkGray]	1	4				+	0	15.362	301300000	8	3.28872	-0.393676	0.0149369	0.00890307	0.0147525	0.329951	0.439315	0.450353
+	-5.30882	3.32711	sp|Q1ZYQ8|EXB10_MAIZE	sp|Q1ZYQ8|EXB10_MAIZE	Color [DarkGray]	1	4				+	0	73.167	3828000000	39	3.32711	-5.30882	0	0	0	4.53345	5.13007	6.26294
	0.0579925	0.427243	sp|Q39189|RH7_ARATH	sp|Q39189|RH7_ARATH	Color [DarkGray]	1	4					0.0082873	2.5358	23627000	1	0.427243	0.0579925	0.173977	0	0	0	0	0
+	-3.56026	2.84522	sp|Q41048|PSBQ1_MAIZE	sp|Q41048|PSBQ1_MAIZE	Color [DarkGray]	1	4				+	0	97.402	3560500000	42	2.84522	-3.56026	0.882	0.654389	0.79064	4.9749	3.46962	4.56329
+	-0.80049	2.00232	sp|Q41739|THI42_MAIZE;sp|Q41738|THI41_MAIZE	sp|Q41739|THI42_MAIZE;sp|Q41738|THI41_MAIZE	Color [DarkGray]	1	4				+	0	111.64	2944700000	53	2.00232	-0.80049	1.52542	1.87562	1.97795	2.80609	2.47327	2.5011
+	32.2188	3.87867	sp|Q41741|IF4A_MAIZE;sp|Q9CAI7|IF4A3_ARATH	sp|Q41741|IF4A_MAIZE;sp|Q9CAI7|IF4A3_ARATH	Color [DarkGray]	1	4				+	0	323.31	52397000000	210	3.87867	32.2188	56.115	55.264	62.2144	24.9808	25.5937	26.3625
+	0.159198	2.74961	sp|Q41745|LPAT_MAIZE	sp|Q41745|LPAT_MAIZE	Color [DarkGray]	1	4				+	0	16.362	145290000	4	2.74961	0.159198	0.179353	0.211908	0.200828	0	0.0619941	0.0525008
+	3.26981	3.41948	sp|Q41761|HGGL2_MAIZE	sp|Q41761|HGGL2_MAIZE	Color [DarkGray]	1	4				+	0	188.78	4320400000	57	3.41948	3.26981	5.61673	4.66137	5.18212	1.92494	1.68306	2.04278
+	4.98677	3.14883	sp|Q41764|ADF3_MAIZE	sp|Q41764|ADF3_MAIZE	Color [DarkGray]	1	4				+	0	120.86	7250400000	54	3.14883	4.98677	8.1779	9.18191	7.4264	3.14905	3.10565	3.57121
+	1.50565	2.10088	sp|Q41768|ILVB1_MAIZE	sp|Q41768|ILVB1_MAIZE	Color [DarkGray]	1	4				+	0	110.9	2925800000	43	2.10088	1.50565	2.56132	3.2228	3.33245	1.18702	1.57593	1.83666
+	0.318442	1.70364	sp|Q41769|ILVB2_MAIZE	sp|Q41769|ILVB2_MAIZE	Color [DarkGray]	1	4				+	0	15.721	485570000	11	1.70364	0.318442	0.711373	0.433879	0.531484	0.194594	0.274917	0.251899
+	1.5118	1.68693	sp|Q41782|TBB4_MAIZE	sp|Q41782|TBB4_MAIZE	Color [DarkGray]	1	4				+	0	90.773	3624300000	38	1.68693	1.5118	4.04182	3.35777	3.52135	2.81453	1.65813	1.91287
+	14.4519	3.47761	sp|Q41783|TBB6_MAIZE	sp|Q41783|TBB6_MAIZE	Color [DarkGray]	1	4				+	0	227.25	21846000000	91	3.47761	14.4519	27.3075	23.2318	24.053	9.99979	10.5071	10.7297
+	52.0314	2.69768	sp|Q41784|TBB7_MAIZE	sp|Q41784|TBB7_MAIZE	Color [DarkGray]	1	4				+	0	323.31	96715000000	349	2.69768	52.0314	101.189	93.2796	114.28	43.0873	54.8061	54.7612
+	119.229	2.67684	sp|Q41803|EF1A_MAIZE	sp|Q41803|EF1A_MAIZE	Color [DarkGray]	1	4				+	0	323.31	198560000000	302	2.67684	119.229	204.808	200.265	248.433	94.1216	89.4819	112.216
	-0.166359	0.733899	sp|Q41806|PSBQ2_MAIZE	sp|Q41806|PSBQ2_MAIZE	Color [DarkGray]	1	4					0	5.4211	173940000	4	0.733899	-0.166359	0	0.0535789	0.0600888	0	0.306536	0.30621
+	0.252395	1.39378	sp|Q41874|TBG3_MAIZE;sp|Q41808|TBG2_MAIZE;sp|Q41807|TBG1_MAIZE	sp|Q41874|TBG3_MAIZE;sp|Q41808|TBG2_MAIZE;sp|Q41807|TBG1_MAIZE	Color [DarkGray]	1	4				+	0	49.472	496880000	10	1.39378	0.252395	0.697736	0.422645	0.474324	0.279525	0.274901	0.283095
	0.0101603	0.383196	sp|Q41822|IOJAP_MAIZE	sp|Q41822|IOJAP_MAIZE	Color [DarkGray]	1	4					0.0082645	2.4895	20177000	3	0.383196	0.0101603	0	0.0266711	0.0326878	0	0.013456	0.015422
+	2.06198	3.3352	sp|Q41852|RS21_MAIZE	sp|Q41852|RS21_MAIZE	Color [DarkGray]	1	4				+	0	5.2595	2682700000	8	3.3352	2.06198	3.08074	2.95538	3.54585	1.00481	1.11566	1.27558
+	-1.70961	3.69015	sp|Q41864|TRXM_MAIZE	sp|Q41864|TRXM_MAIZE	Color [DarkGray]	1	4				+	0	37.662	1475500000	9	3.69015	-1.70961	0.0558227	0.201485	0.271021	1.65813	1.9642	2.03482
	-0.0338321	0.383817	sp|Q41870|PIP11_MAIZE	sp|Q41870|PIP11_MAIZE	Color [DarkGray]	1	4					0	7.2514	124350000	4	0.383817	-0.0338321	0	0.102167	0.112574	0.121109	0.105997	0.0891309
	0.0118781	0.0359024	sp|Q41898|ATP5E_MAIZE	sp|Q41898|ATP5E_MAIZE	Color [DarkGray]	1	4					0	43.779	298120000	4	0.0359024	0.0118781	0	0.315953	0.345025	0.184803	0.195687	0.244853
	0.045909	0.325484	sp|Q42368|PPDK2_MAIZE	sp|Q42368|PPDK2_MAIZE	Color [DarkGray]	1	4					0.0028986	3.1116	31038000	2	0.325484	0.045909	0.170715	0	0	0.0329883	0	0
+	18.5568	2.28284	sp|Q43247|G3PC3_MAIZE	sp|Q43247|G3PC3_MAIZE	Color [DarkGray]	1	4				+	0	323.31	23117000000	92	2.28284	18.5568	34.4936	23.889	26.8546	8.41332	9.07698	12.0764
+	-0.0910174	1.79849	sp|Q43250|C71C1_MAIZE	sp|Q43250|C71C1_MAIZE	Color [DarkGray]	1	4				+	0	5.905	65978000	4	1.79849	-0.0910174	0	0	0	0.0457083	0.112976	0.114368
+	-0.15703	2.21526	sp|Q43255|C71C2_MAIZE	sp|Q43255|C71C2_MAIZE	Color [DarkGray]	1	4				+	0	6.1892	113950000	3	2.21526	-0.15703	0	0	0	0.0984648	0.194198	0.178426
	-0.0751332	0.427243	sp|Q43257|C71C4_MAIZE	sp|Q43257|C71C4_MAIZE	Color [DarkGray]	1	4					0	4.2402	53662000	2	0.427243	-0.0751332	0	0	0	0.2254	0	0
	-0.561524	0.31399	sp|Q43260|DHE3_MAIZE	sp|Q43260|DHE3_MAIZE	Color [DarkGray]	1	4					0	121.46	2779900000	28	0.31399	-0.561524	3.0194	1.38284	1.27178	3.37927	2.03939	1.93994
+	5.9565	3.63723	sp|Q43266|PCNA_MAIZE	sp|Q43266|PCNA_MAIZE	Color [DarkGray]	1	4				+	0	194.29	10197000000	67	3.63723	5.9565	11.0622	10.3663	11.9075	5.47601	4.96386	5.02663
+	4.54212	4.38073	sp|Q43270|PLDA1_MAIZE	sp|Q43270|PLDA1_MAIZE	Color [DarkGray]	1	4				+	0	250.36	7045100000	87	4.38073	4.54212	8.30161	7.55858	7.92436	3.25796	3.33134	3.56887
	0.432764	0.472927	sp|Q43272|GAPN_MAIZE	sp|Q43272|GAPN_MAIZE	Color [DarkGray]	1	4					0	105.31	2187500000	39	0.472927	0.432764	1.42432	2.01464	2.20198	0.811509	1.82772	1.70342
+	1.42588	3.82994	sp|Q43298|CH62_MAIZE;sp|P29197|CH60A_ARATH	sp|Q43298|CH62_MAIZE	Color [DarkGray]	1	4				+	0	70.115	2239000000	12	3.82994	1.42588	2.41589	2.49539	2.5695	0.900095	1.21334	1.08972
+	-0.130284	2.62267	sp|Q43695|TBB3_MAIZE;CON__ENSEMBL:ENSBTAP00000025008	sp|Q43695|TBB3_MAIZE	Color [DarkGray]	1	4				+	0	44.855	94867000	3	2.62267	-0.130284	0	0	0	0.140565	0.156888	0.0934006
	1.91602	0.364347	sp|Q43697|TBB5_MAIZE;sp|Q41785|TBB8_MAIZE	sp|Q43697|TBB5_MAIZE;sp|Q41785|TBB8_MAIZE	Color [DarkGray]	1	4					0	116.95	7787200000	24	0.364347	1.91602	2.40175	8.30244	9.50604	4.71868	4.92211	4.82137
+	6.33492	4.15271	sp|Q9LFN6|RH56_ARATH;sp|Q56XG6|RH15_ARATH	sp|Q9LFN6|RH56_ARATH;sp|Q56XG6|RH15_ARATH	Color [DarkGray]	1	4				+	0	91.76	7541600000	53	4.15271	6.33492	9.52469	8.62141	9.75751	3.23982	2.85709	2.80193
+	-0.156206	1.16175	sp|Q56YU0|AL2C4_ARATH	sp|Q56YU0|AL2C4_ARATH	Color [DarkGray]	1	4					0	3.9216	429390000	6	1.16175	-0.156206	0.131998	0.293388	0.281639	0.428352	0.319802	0.427489
	-0.163332	0.0427127	sp|Q6E0W6|L_MMVR	sp|Q6E0W6|L_MMVR	Color [DarkGray]	1	4					0	4.0642	3660400000	6	0.0427127	-0.163332	0	3.4356	4.22228	2.71931	2.47768	2.95089
+	1.15362	2.22892	sp|Q6JB11|MEG5_MAIZE	sp|Q6JB11|MEG5_MAIZE	Color [DarkGray]	1	4				+	0	14.154	1302400000	16	2.22892	1.15362	1.63418	1.9744	1.24843	0.389806	0.562358	0.443987
+	95.0054	3.57197	sp|Q6XZ78|SCRK2_MAIZE	sp|Q6XZ78|SCRK2_MAIZE	Color [DarkGray]	1	4				+	0	323.31	98302000000	202	3.57197	95.0054	140.039	114.709	131.389	38.7147	31.8931	30.5127
+	8.25955	3.16128	sp|Q6XZ79|SCRK1_MAIZE	sp|Q6XZ79|SCRK1_MAIZE	Color [DarkGray]	1	4				+	0	179.04	8973000000	73	3.16128	8.25955	12.5695	9.80822	12.2353	3.35361	3.23141	3.24934
+	15.7839	1.59067	sp|Q7SIC9|TKTC_MAIZE	sp|Q7SIC9|TKTC_MAIZE	Color [DarkGray]	1	4				+	0	323.31	39591000000	216	1.59067	15.7839	46.9865	33.2707	38.6778	26.3215	19.4809	25.781
+	18.5018	2.6819	sp|Q84RL7|PIP21_MAIZE	sp|Q84RL7|PIP21_MAIZE	Color [DarkGray]	1	4				+	0	121.86	17572000000	38	2.6819	18.5018	18.4117	24.7444	26.9095	5.88386	4.62711	4.04937
+	6.6462	6.17273	sp|Q84TC2|BX6_MAIZE	sp|Q84TC2|BX6_MAIZE	Color [DarkGray]	1	4				+	0	178.53	5957200000	36	6.17273	6.6462	8.29572	8.33293	8.0466	1.42338	1.61173	1.70155
+	1.13387	1.10698	sp|Q84W89|RH37_ARATH;sp|Q9M2F9|RH52_ARATH	sp|Q84W89|RH37_ARATH;sp|Q9M2F9|RH52_ARATH	Color [DarkGray]	1	4					0	40.075	2726300000	33	1.10698	1.13387	1.93049	2.84938	3.23231	2.09951	1.15091	1.36015
+	5.61995	3.57061	sp|Q84Y01|ITPK1_MAIZE	sp|Q84Y01|ITPK1_MAIZE	Color [DarkGray]	1	4				+	0	124.94	3858800000	37	3.57061	5.61995	6.85152	5.26039	6.25337	0.482411	0.560744	0.462261
	0	0	sp|Q8H0U8|RH42_ARATH	sp|Q8H0U8|RH42_ARATH	Color [DarkGray]	1	4	+				1	-2	0	1	0	0	0	0	0	0	0	0
+	0.358755	1.746	sp|Q8H136|RH14_ARATH;sp|Q9LYJ9|RH46_ARATH	sp|Q8H136|RH14_ARATH	Color [DarkGray]	1	4				+	0	11.431	437180000	7	1.746	0.358755	0.695851	0.452175	0.482447	0.288228	0.141243	0.124735
+	3.72146	1.95215	sp|Q8H6A5|TCTP_MAIZE	sp|Q8H6A5|TCTP_MAIZE	Color [DarkGray]	1	4				+	0	175.01	8199000000	34	1.95215	3.72146	7.62417	8.0268	9.29298	3.91381	3.94061	5.92517
	1.80616	0.712231	sp|Q8H6B1|SPT16_MAIZE	sp|Q8H6B1|SPT16_MAIZE	Color [DarkGray]	1	4					0	323.31	2491800000	15	0.712231	1.80616	0.556231	3.69379	4.02126	0.253009	1.26426	1.33551
	-0.0701381	0.615722	sp|Q8L840|RQL4A_ARATH	sp|Q8L840|RQL4A_ARATH	Color [DarkGray]	1	4					0.0084034	2.6644	60278000	3	0.615722	-0.0701381	0	0.0207455	0	0.178124	0.0197156	0.0333196
	0.177527	0.6403	sp|Q8LA13|RH11_ARATH	sp|Q8LA13|RH11_ARATH	Color [DarkGray]	1	4					0	4.0943	351750000	9	0.6403	0.177527	0.110386	0.436527	0.50968	0.221565	0.140247	0.162201
	0.0369491	0.507635	sp|Q8LPU5|CMT3_MAIZE;sp|Q9ARI6|CMT2_MAIZE	sp|Q8LPU5|CMT3_MAIZE;sp|Q9ARI6|CMT2_MAIZE	Color [DarkGray]	1	4					0	4.075	60952000	2	0.507635	0.0369491	0	0.0902303	0.098583	0.0344476	0.0197771	0.0237414
+	0.68754	2.98824	sp|Q8RXK6|RH8_ARATH;sp|Q94BV4|RH6_ARATH;sp|Q9M2E0|RH12_ARATH	sp|Q8RXK6|RH8_ARATH;sp|Q94BV4|RH6_ARATH	Color [DarkGray]	1	4				+	0	20.721	915130000	12	2.98824	0.68754	1.18243	1.01994	1.06122	0.325838	0.347529	0.527606
	-0.134579	0.684612	sp|Q8RXS6|INO80_ARATH	sp|Q8RXS6|INO80_ARATH	Color [DarkGray]	1	4					0.0029412	3.1632	213940000	3	0.684612	-0.134579	0.191863	0.0467822	0.0544906	0.33891	0.0852124	0.272749
+	0.187013	1.22487	sp|Q8S528|AL2B7_ARATH	sp|Q8S528|AL2B7_ARATH	Color [DarkGray]	1	4					0	3.9358	389880000	9	1.22487	0.187013	0.286772	0.447801	0.446777	0.111389	0.249855	0.259066
+	11.7298	3.68693	sp|Q8VXG7|PALY_MAIZE	sp|Q8VXG7|PALY_MAIZE	Color [DarkGray]	1	4				+	0	323.31	18139000000	128	3.68693	11.7298	19.9322	19.9627	21.194	8.7422	7.18683	9.97055
+	0.483271	1.33168	sp|Q8W2B7|BX8_MAIZE	sp|Q8W2B7|BX8_MAIZE	Color [DarkGray]	1	4				+	0	88.435	2483700000	34	1.33168	0.483271	1.86562	2.20125	2.38175	1.51709	1.70594	1.77578
+	0.192112	1.23181	sp|Q8W4R3|RH30_ARATH	sp|Q8W4R3|RH30_ARATH	Color [DarkGray]	1	4					0	13.088	338100000	9	1.23181	0.192112	0.492655	0.292955	0.335989	0.26322	0.132397	0.149647
+	1.22505	1.61086	sp|Q8W519|MMT1_MAIZE	sp|Q8W519|MMT1_MAIZE	Color [DarkGray]	1	4				+	0	137.77	2209700000	30	1.61086	1.22505	3.04407	1.99422	2.19459	1.4017	1.21306	0.94297
+	1.28366	2.96729	sp|Q94A52|RH2_ARATH;sp|Q9C8J1|RH34_ARATH	sp|Q94A52|RH2_ARATH	Color [DarkGray]	1	4				+	0	41.789	1374700000	21	2.96729	1.28366	1.68168	1.97147	1.59715	0.32901	0.406113	0.664184
+	0.18772	1.46587	sp|Q9AQU5|PIP13_MAIZE;sp|Q9AR14|PIP15_MAIZE	sp|Q9AQU5|PIP13_MAIZE	Color [DarkGray]	1	4				+	0	3.8661	248690000	3	1.46587	0.18772	0.33621	0.263092	0.288734	0.182938	0.141937	0
	-0.444565	0.694391	sp|Q9ATM0|TIP12_MAIZE	sp|Q9ATM0|TIP12_MAIZE	Color [DarkGray]	1	4					0	9.9206	318790000	4	0.694391	-0.444565	0	0	0	1.02787	0.150259	0.155567
+	0.274956	3.20299	sp|Q9ATM2|SIP12_MAIZE	sp|Q9ATM2|SIP12_MAIZE	Color [DarkGray]	1	4				+	0.003003	3.387	215880000	2	3.20299	0.274956	0.310961	0.295334	0.34526	0.0835829	0.0431044	0
+	0.111821	1.13461	sp|Q9ATM7|PIP23_MAIZE;sp|Q9ATM6|PIP24_MAIZE	sp|Q9ATM7|PIP23_MAIZE;sp|Q9ATM6|PIP24_MAIZE	Color [DarkGray]	1	4					0.0057307	2.9988	88830000	2	1.13461	0.111821	0.17358	0.17898	0.0375511	0.0139133	0.017508	0.0232269
	0.213062	0.403479	sp|Q9ATM8|PIP22_MAIZE	sp|Q9ATM8|PIP22_MAIZE	Color [DarkGray]	1	4					0	28.056	734850000	10	0.403479	0.213062	0.224844	0.954662	0.761102	0.335789	0.474921	0.490712
	0.166132	0.386577	sp|Q9AXT8|CMT1_MAIZE	sp|Q9AXT8|CMT1_MAIZE	Color [DarkGray]	1	4					0	45.722	1119100000	24	0.386577	0.166132	0.690762	0.859332	1.26445	0.657944	0.789539	0.868661
	-0.0414449	0.221971	sp|Q9C551|RH5_ARATH	sp|Q9C551|RH5_ARATH	Color [DarkGray]	1	4					0	4.1908	95813000	0	0.221971	-0.0414449	0	0.0777323	0.0631274	0.223993	0.0412021	0
	0.317876	0.781301	sp|Q9C718|RH20_ARATH	sp|Q9C718|RH20_ARATH	Color [DarkGray]	1	4					0.0030581	3.5196	430240000	7	0.781301	0.317876	0.11652	0.67092	0.651083	0.071112	0.18369	0.230091
+	0.216315	2.71653	sp|Q9FJR0|RENT1_ARATH	sp|Q9FJR0|RENT1_ARATH	Color [DarkGray]	1	4				+	0	25.057	303720000	9	2.71653	0.216315	0.40729	0.32234	0.336628	0.111066	0.149723	0.156524
+	0.473327	1.52492	sp|Q9FPK7|INO1_MAIZE	sp|Q9FPK7|INO1_MAIZE	Color [DarkGray]	1	4				+	0	110.09	1880500000	36	1.52492	0.473327	1.64795	1.53864	1.91792	1.05147	1.32586	1.30719
	-0.0846926	0.127525	sp|Q9FQ11|SPP1_MAIZE	sp|Q9FQ11|SPP1_MAIZE	Color [DarkGray]	1	4					0	68.518	2244800000	29	0.127525	-0.0846926	1.76481	1.63738	1.62454	2.23661	1.56384	1.48036
	0.057397	0.299432	sp|Q9FT73|MED34_ARATH	sp|Q9FT73|MED34_ARATH	Color [DarkGray]	1	4					0	5.01	229470000	7	0.299432	0.057397	0.16629	0.209132	0.241403	0.297604	0.0688592	0.0781709
+	0.337844	1.62415	sp|Q9FUM8|HMT3_MAIZE;sp|Q9FUM9|HMT2_MAIZE	sp|Q9FUM8|HMT3_MAIZE;sp|Q9FUM9|HMT2_MAIZE	Color [DarkGray]	1	4				+	0	21.798	337770000	5	1.62415	0.337844	0.467059	0.281672	0.607724	0.13484	0.0949448	0.113138
+	3.92114	1.08395	sp|Q9FYS5|HMGYA_MAIZE	sp|Q9FYS5|HMGYA_MAIZE	Color [DarkGray]	1	4					0	136.68	6923600000	100	1.08395	3.92114	10.9613	5.86503	6.26933	4.54017	2.932	3.86009
+	0.139904	3.49556	sp|Q9LEF5|SSRP1_MAIZE	sp|Q9LEF5|SSRP1_MAIZE	Color [DarkGray]	1	4				+	0	11.056	166020000	5	3.49556	0.139904	0.18316	0.204173	0.222528	0.0674871	0.0551291	0.0675313
+	2.54787	1.63482	sp|Q9M4U4|HDT3_MAIZE;sp|O24591|HDT1_MAIZE	sp|Q9M4U4|HDT3_MAIZE;sp|O24591|HDT1_MAIZE	Color [DarkGray]	1	4				+	0	59.474	2257900000	31	1.63482	2.54787	4.61323	2.63068	2.43359	0.973265	0.492881	0.567748
+	4.89525	3.13718	sp|Q9M4U5|HDT2_MAIZE	sp|Q9M4U5|HDT2_MAIZE	Color [DarkGray]	1	4				+	0	90.675	5881300000	46	3.13718	4.89525	8.07776	7.13409	6.53927	2.83974	1.90153	2.32408
	0.0343712	0.221326	sp|Q9SB89|RH27_ARATH	sp|Q9SB89|RH27_ARATH	Color [DarkGray]	1	4					0.0056657	2.8152	44094000	1	0.221326	0.0343712	0.175074	0.00674169	0	0.0648577	0	0.0138449
+	14.4871	1.37868	sp|Q9SE94|MTHR1_MAIZE	sp|Q9SE94|MTHR1_MAIZE	Color [DarkGray]	1	4				+	0	323.31	31869000000	201	1.37868	14.4871	41.9852	25.2845	32.0232	20.0588	17.8999	17.8729
+	-0.703112	1.15775	sp|Q9SLZ0|PCKA_MAIZE	sp|Q9SLZ0|PCKA_MAIZE	Color [DarkGray]	1	4					0	29.402	740010000	16	1.15775	-0.703112	0.0866168	0.263052	0.171146	0.449102	0.77469	1.40636
+	50.2078	3.07435	sp|Q9SP22|CALR_MAIZE	sp|Q9SP22|CALR_MAIZE	Color [DarkGray]	1	4				+	0	323.31	51347000000	145	3.07435	50.2078	65.4298	58.7907	77.4773	19.0033	15.2445	16.8267
+	1.14487	1.8122	sp|Q9SU63|AL2B4_ARATH	sp|Q9SU63|AL2B4_ARATH	Color [DarkGray]	1	4				+	0	76.76	3236300000	27	1.8122	1.14487	3.66452	2.7713	3.00424	1.84946	1.99413	2.16187
+	1.35733	2.87146	sp|Q9SX04|MCM32_MAIZE;sp|Q9SX03|MCM33_MAIZE;sp|Q43704|MCM31_MAIZE	sp|Q9SX04|MCM32_MAIZE;sp|Q9SX03|MCM33_MAIZE;sp|Q43704|MCM31_MAIZE	Color [DarkGray]	1	4				+	0	93.2	2584500000	46	2.87146	1.35733	2.7873	2.4409	2.99032	1.28779	1.37281	1.48595
	0.0534518	0.411396	sp|Q9SYP1|DEXHC_ARATH	sp|Q9SYP1|DEXHC_ARATH	Color [DarkGray]	1	4					0	14.021	89743000	4	0.411396	0.0534518	0	0.122629	0.156836	0.020076	0.00418598	0.0948469
+	0.0526367	1.11285	sp|Q9TJN6|RR17_MAIZE	sp|Q9TJN6|RR17_MAIZE	Color [DarkGray]	1	4					0	5.4844	79736000	5	1.11285	0.0526367	0.0827805	0.0767212	0.112569	0.0625559	0	0.0516044
+	2.58787	1.01557	sp|Q9XF59|PIP12_MAIZE	sp|Q9XF59|PIP12_MAIZE	Color [DarkGray]	1	4					0	62.13	3492500000	29	1.01557	2.58787	1.62741	4.76288	5.46103	0.995191	1.69007	1.40246
+	0.111629	1.34444	sp|Q9XGD5|CAMT2_MAIZE	sp|Q9XGD5|CAMT2_MAIZE	Color [DarkGray]	1	4				+	0	51.966	103500000	3	1.34444	0.111629	0.185229	0.114316	0.132871	0.0975281	0	0
	-0.255145	0.591772	sp|Q9XGD6|CAMT1_MAIZE	sp|Q9XGD6|CAMT1_MAIZE	Color [DarkGray]	1	4					0	167.31	3423500000	43	0.591772	-0.255145	2.75329	2.4472	2.25851	2.72053	2.97257	2.53133
+	2.10579	2.95963	sp|Q9XHR2|EIF3A_MAIZE	sp|Q9XHR2|EIF3A_MAIZE	Color [DarkGray]	1	4				+	0	113.4	4463100000	59	2.95963	2.10579	4.97706	4.19916	4.64959	2.72024	2.4136	2.37462
	-0.00295826	0.069573	sp|Q9XIK4|NT101_ARATH	sp|Q9XIK4|NT101_ARATH	Color [DarkGray]	1	4					0.0029326	3.1537	39534000	1	0.069573	-0.00295826	0	0.0369756	0.0438803	0.0415684	0.0219933	0.026169
	0.0243794	0.232444	sp|Q9ZSV1|PARP1_MAIZE;sp|O50017|PARP2_MAIZE	sp|Q9ZSV1|PARP1_MAIZE	Color [DarkGray]	1	4					0	5.8483	82453000	4	0.232444	0.0243794	0.00725069	0.0824868	0.127877	0.00799328	0.0809547	0.0555276
+	-5.5893	1.70744	sp|Q9ZT00|RCA_MAIZE	sp|Q9ZT00|RCA_MAIZE	Color [DarkGray]	1	4				+	0	288.33	5913300000	54	1.70744	-5.5893	4.59438	0.148114	0.151402	7.15657	7.34201	7.16321
+	9.27789	3.10918	sp|Q9ZT66|E134_MAIZE	sp|Q9ZT66|E134_MAIZE	Color [DarkGray]	1	4				+	0	102.05	7997200000	34	3.10918	9.27789	9.77504	10.7631	13.0152	1.28678	2.11717	2.31572
	-0.0404201	0.605614	sp|Q9ZTP4|ZDS_MAIZE	sp|Q9ZTP4|ZDS_MAIZE	Color [DarkGray]	1	4					0	14.314	62926000	3	0.605614	-0.0404201	0.0891425	0	0	0.06545	0.0768152	0.0681375
