# Supplementary material for: Physiological Mechanisms Underlying Tassel Symptom Formation in Maize Infected with Sporisorium reilianum
Source: Plants (Basel). 2024 Jan 15;13(2):238. doi: 10.3390/plants13020238 (PMC10820020; doi:10.3390/plants13020238)
Supplement: Supplementary file 1 [file plants-13-00238-s001.zip › BC_report.xlsx]

## Sheet: Dataset(BC)
Name of datase: BC
No. of identified items: 238 of 238
No. of unidentified items: 0
ID type: ProteinAccesion
Number of mapped protein: 238
Is dataset quantitative :NO
Mapped items:
UniProt accession			UniProt ID	UniProt accession	Protein name	Gene	Alt Accessions
A1Y2B7			SGS3_MAIZE	A1Y2B7	Protein SUPPRESSOR OF GENE SILENCING 3 homolog	Name=SGS3; Synonyms=LBL1;	A1Y2B7;
A4KA61			PRO12_MAIZE	A4KA61	Profilin-12		A4KA61;
A4KA58			PROF9_MAIZE	A4KA58	Profilin-9		A4KA58;
A5H453			PER42_MAIZE	A5H453	Peroxidase 42	Name=PER42; Synonyms=POX3-1, PRX42;	A5H453;
A5H8G4			PER1_MAIZE	A5H8G4	Peroxidase 1	Name=PER1; Synonyms=POX1, PRX1;	A5H8G4; Q9FEQ9;
B1P123			BX7_MAIZE	B1P123	TRIBOA-glucoside O-methyltransferase BX7	Name=BX7; Synonyms=ZRP4;	B1P123;
B2LXS7			WHY1_MAIZE	B2LXS7	Single-stranded DNA-binding protein WHY1, chloroplastic	Name=WHY1;	B2LXS7;
B4F9A4			DMAS1_MAIZE	B4F9A4	Deoxymugineic acid synthase 1 {ECO:0000303|PubMed:16926158}	Name=DMAS1 {ECO:0000303|PubMed:16926158};ORFNames=ZEAMMB73_Zm00001d028360 {ECO:0000312|EMBL:ONL95785.1};	B4F9A4; Q0PCF2;
B4FBQ7			CSPL6_MAIZE	B4FBQ7	CASP-like protein 2A1		B4FBQ7;
B4G072			BX9_MAIZE	B4G072	DIMBOA UDP-glucosyltransferase BX9	Name=BX9;	B4G072; Q8W2B6;
B4G0F3			MTBC_MAIZE	B4G0F3	Probable bifunctional methylthioribulose-1-phosphate dehydratase/enolase-phosphatase E1 {ECO:0000255|HAMAP-Rule:MF_03118}		B4G0F3; B6T6D3;
B6TB21			DRE2_MAIZE	B6TB21	Anamorsin homolog {ECO:0000255|HAMAP-Rule:MF_03115}		B6TB21;
B6TTW1			CYNS_MAIZE	B6TTW1	Cyanate hydratase {ECO:0000255|HAMAP-Rule:MF_03139}	Name=CYN {ECO:0000255|HAMAP-Rule:MF_03139};	B6TTW1; C4J2E0;
B6TVL4			CAS_MAIZE	B6TVL4	Calcium sensing receptor, chloroplastic		B6TVL4;
B6TZD1			MTNA_MAIZE	B6TZD1	Methylthioribose-1-phosphate isomerase {ECO:0000255|HAMAP-Rule:MF_03119}	Name=IDI2;	B6TZD1; B6TL88; B8A2A0; Q5XTZ5;
C0PF72			ARGJ_MAIZE	C0PF72	Arginine biosynthesis bifunctional protein ArgJ, chloroplastic {ECO:0000255|HAMAP-Rule:MF_03124}		C0PF72;
F4IHS2			SYD_ARATH	F4IHS2	Chromatin structure-remodeling complex protein SYD	Name=SYD; Synonyms=CHR3; OrderedLocusNames=At2g28290; ORFNames=T3B23;	F4IHS2; F4IHS3; F4IHS4; Q5BN47; Q8L9D7; Q9AUB4; Q9SL27;
F4JAA5			SKI2_ARATH	F4JAA5	DExH-box ATP-dependent RNA helicase DExH11 {ECO:0000305}	Name=SKI2 {ECO:0000303|PubMed:22511887};Synonyms=HELPS {ECO:0000303|PubMed:21535471};OrderedLocusNames=At3g46960 {ECO:0000312|Araport:AT3G46960};ORFNames=F13I12.10 {ECO:0000312|EMBL:CAB61942.1},T6H20.10 {ECO:0000312|EMBL:CAB51169.1};	F4JAA5; Q9SD77; Q9STG8;
F4KBP5			CHR4_ARATH	F4KBP5	Protein CHROMATIN REMODELING 4 {ECO:0000303|PubMed:16547115}	Name=CHR4 {ECO:0000303|PubMed:16547115};Synonyms=PKR1 {ECO:0000303|PubMed:10570159};OrderedLocusNames=At5g44800 {ECO:0000312|Araport:AT5G44800};ORFNames=K23L20_15 {ECO:0000312|EMBL:BAB08833.1},T19K24.8 {ECO:0000312|EMBL:AAC79140.1};	F4KBP5; O48579; Q8GX65;
O22424			RS4_MAIZE	O22424	40S ribosomal protein S4	Name=RPS4;	O22424;
Q9FR39			PROF5_MAIZE	Q9FR39	Profilin-5	Name=PRO5;	Q9FR39;
Q9LZQ9			DEAH2_ARATH	Q9LZQ9	Probable pre-mRNA-splicing factor ATP-dependent RNA helicase DEAH2 {ECO:0000305}	OrderedLocusNames=At3g62310 {ECO:0000312|Araport:AT3G62310};ORFNames=T12C14_10 {ECO:0000312|EMBL:CAB82945.1};	Q9LZQ9;
O23888			ALDO2_MAIZE	O23888	Indole-3-acetaldehyde oxidase	Name=AO2;	O23888;
O24413			RLA3_MAIZE	O24413	60S acidic ribosomal protein P3	Name=RPP3A;	O24413;
O24415			RLA2B_MAIZE	O24415	60S acidic ribosomal protein P2B	Name=RPP2B;	O24415;
O24562			CADH_MAIZE	O24562	Probable cinnamyl alcohol dehydrogenase	Name=CAD; Synonyms=BM1;	O24562; O64408;
O24573			RLA0_MAIZE	O24573	60S acidic ribosomal protein P0	Name=RP-P0;	O24573;
O24578			PURA_MAIZE	O24578	Adenylosuccinate synthetase, chloroplastic {ECO:0000255|HAMAP-Rule:MF_03125}	Name=PURA {ECO:0000255|HAMAP-Rule:MF_03125};	O24578;
O48556			IPYR_MAIZE	O48556	Soluble inorganic pyrophosphatase	Name=IPP;	O48556;
O48557			RL17_MAIZE	O48557	60S ribosomal protein L17	Name=RPL17;	O48557;
O48558			RL30_MAIZE	O48558	60S ribosomal protein L30	Name=RPL30;	O48558;
O64964			TIP11_MAIZE	O64964	Aquaporin TIP1-1	Name=TIP1-1; Synonyms=TIP1;	O64964;
O65107			PSAN_MAIZE	O65107	Photosystem I reaction center subunit N, chloroplastic	Name=PSAN;	O65107;
O81220			DCUP_MAIZE	O81220	Uroporphyrinogen decarboxylase, chloroplastic	Name=LES22;	O81220;
O81395			DRTS_MAIZE	O81395	Bifunctional dihydrofolate reductase-thymidylate synthase	Name=DRTS;	O81395;
O82106			ZM33_MAIZE	O82106	Anther-specific protein MZm3-3		O82106;
P00333			ADH1_MAIZE	P00333	Alcohol dehydrogenase 1	Name=ADH1;	P00333;
P00827			ATPB_MAIZE	P00827	ATP synthase subunit beta, chloroplastic {ECO:0000255|HAMAP-Rule:MF_01347}	Name=atpB {ECO:0000255|HAMAP-Rule:MF_01347};	P00827;
P00835			ATPE_MAIZE	P00835	ATP synthase epsilon chain, chloroplastic {ECO:0000255|HAMAP-Rule:MF_00530}	Name=atpE {ECO:0000255|HAMAP-Rule:MF_00530};	P00835;
P00874			RBL_MAIZE	P00874	Ribulose bisphosphate carboxylase large chain {ECO:0000255|HAMAP-Rule:MF_01338}	Name=rbcL {ECO:0000255|HAMAP-Rule:MF_01338};	P00874;
P02582			ACT1_MAIZE	P02582	Actin-1	Name=ACT1; Synonyms=ACT-1;	P02582;
P04707			ADH2_MAIZE	P04707	Alcohol dehydrogenase 2	Name=ADH2;	P04707;
P04709			ADT1_MAIZE	P04709	ADP,ATP carrier protein 1, mitochondrial	Name=ANT1; Synonyms=ANT-G1;	P04709;
P04711			CAPP1_MAIZE	P04711	Phosphoenolpyruvate carboxylase 1	Name=PEP1; Synonyms=PPC;	P04711;
P04713			SSG1_MAIZE	P04713	Granule-bound starch synthase 1, chloroplastic/amyloplastic	Name=WAXY;	P04713;
P04907			GSTF3_MAIZE	P04907	Glutathione S-transferase 3	Name=GST3;	P04907; P15542;
P04966			PSAA_MAIZE	P04966	Photosystem I P700 chlorophyll a apoprotein A1 {ECO:0000255|HAMAP-Rule:MF_00458}	Name=psaA {ECO:0000255|HAMAP-Rule:MF_00458}; Synonyms=ps1a1;	P04966;
P04967			PSAB_MAIZE	P04967	Photosystem I P700 chlorophyll a apoprotein A2 {ECO:0000255|HAMAP-Rule:MF_00482}	Name=psaB {ECO:0000255|HAMAP-Rule:MF_00482}; Synonyms=ps1a2;	P04967;
P05022			ATPA_MAIZE	P05022	ATP synthase subunit alpha, chloroplastic {ECO:0000255|HAMAP-Rule:MF_01346}	Name=atpA {ECO:0000255|HAMAP-Rule:MF_01346};	P05022;
P05348			RBS_MAIZE	P05348	Ribulose bisphosphate carboxylase small chain, chloroplastic	Name=RBCS;	P05348; Q43355;
P05494			ATPAM_MAIZE	P05494	ATP synthase subunit alpha, mitochondrial	Name=ATPA;	P05494;
P05641			PSBB_MAIZE	P05641	Photosystem II CP47 reaction center protein {ECO:0000255|HAMAP-Rule:MF_01495}	Name=psbB {ECO:0000255|HAMAP-Rule:MF_01495};	P05641;
P05642			CYB6_MAIZE	P05642	Cytochrome b6 {ECO:0000255|HAMAP-Rule:MF_00633}	Name=petB {ECO:0000255|HAMAP-Rule:MF_00633};	P05642; Q33298; Q36712;
P05643			PETD_MAIZE	P05643	Cytochrome b6-f complex subunit 4 {ECO:0000255|HAMAP-Rule:MF_01344}	Name=petD {ECO:0000255|HAMAP-Rule:MF_01344};	P05643; Q33299;
P06671			CB22_MAIZE	P06671	Chlorophyll a-b binding protein, chloroplastic		P06671;
P08440			ALF_MAIZE	P08440	Fructose-bisphosphate aldolase, cytoplasmic isozyme		P08440;
P08735			G3PC1_MAIZE	P08735	Glyceraldehyde-3-phosphate dehydrogenase 1, cytosolic	Name=GAPC1; Synonyms=GAPC, GPC1;	P08735;
P09233			SODM1_MAIZE	P09233	Superoxide dismutase [Mn] 3.1, mitochondrial	Name=SODA.4; Synonyms=SOD3, SOD3.1;	P09233;
P09315			G3PA_MAIZE	P09315	Glyceraldehyde-3-phosphate dehydrogenase A, chloroplastic	Name=GAPA; Synonyms=GPA1;	P09315; P15985;
P0C1M0			ATPG_MAIZE	P0C1M0	ATP synthase subunit gamma, chloroplastic		P0C1M0;
P0C1Y5			EXB11_MAIZE	P0C1Y5	Expansin-B11	Name=EXPB11;	P0C1Y5;
P10581			RPOP_MAIZE	P10581	Probable DNA-directed RNA polymerase		P10581;
P10979			GRPA_MAIZE	P10979	Glycine-rich RNA-binding, abscisic acid-inducible protein	Name=RAB15;	P10979;
P11143			HSP70_MAIZE	P11143	Heat shock 70 kDa protein	Name=HSP70;	P11143;
P11155			PPDK1_MAIZE	P11155	Pyruvate, phosphate dikinase 1, chloroplastic {ECO:0000303|PubMed:1668653}	Name=PPDK1 {ECO:0000303|PubMed:1668653};Synonyms=C4PPDKZM1 {ECO:0000303|PubMed:1668653},CYPPDKZM1 {ECO:0000303|PubMed:1668653},PPDK2 {ECO:0000303|PubMed:2158100};	P11155; C5IHE0; Q41846; Q41847; Q42367; Q7DMU6; Q9XGW9;
P11428			SODC2_MAIZE	P11428	Superoxide dismutase [Cu-Zn] 2	Name=SODCC.1; Synonyms=SOD2;	P11428;
P11601			PSAC_MAIZE	P11601	Photosystem I iron-sulfur center {ECO:0000255|HAMAP-Rule:MF_01303}	Name=psaC {ECO:0000255|HAMAP-Rule:MF_01303}; Synonyms=frxA;	P11601;
P12329			CB21_MAIZE	P12329	Chlorophyll a-b binding protein 1, chloroplastic	Name=CAB1;	P12329;
P12653			GSTF1_MAIZE	P12653	Glutathione S-transferase 1	Name=GST1;	P12653;
P12863			TPIS_MAIZE	P12863	Triosephosphate isomerase, cytosolic		P12863;
P13689			ABP1_MAIZE	P13689	Auxin-binding protein 1 {ECO:0000303|PubMed:2555179}	Name=ABP1 {ECO:0000303|PubMed:2555179};Synonyms=AUX311 {ECO:0000303|PubMed:1650260};	P13689; Q41193;
P14641			TBA2_MAIZE	P14641	Tubulin alpha-2 chain	Name=TUBA2; Synonyms=TUA2;	P14641;
P15719			MDHP_MAIZE	P15719	Malate dehydrogenase [NADP], chloroplastic		P15719;
P16166			UFOG1_MAIZE	P16166	Anthocyanidin 3-O-glucosyltransferase	Name=BZ1; Synonyms=UGT71A1;	P16166; Q9ATX0;
P16243			MAOC_MAIZE	P16243	NADP-dependent malic enzyme, chloroplastic	Name=MOD1; Synonyms=ME1;	P16243;
P17788			RK2_MAIZE	P17788	50S ribosomal protein L2, chloroplastic	Name=rpl2-A;andName=rpl2-B;	P17788;
P18025			TBB1_MAIZE	P18025	Tubulin beta-1 chain	Name=TUBB1; Synonyms=TUB1;	P18025;
P18026			TBB2_MAIZE	P18026	Tubulin beta-2 chain	Name=TUBB2; Synonyms=TUB2;	P18026;
P18123			CATA3_MAIZE	P18123	Catalase isozyme 3	Name=CAT3;	P18123;
P19023			ATPBM_MAIZE	P19023	ATP synthase subunit beta, mitochondrial	Name=ATPB; Synonyms=ATP2;	P19023;
P19124			NDHJ_MAIZE	P19124	NAD(P)H-quinone oxidoreductase subunit J, chloroplastic {ECO:0000255|HAMAP-Rule:MF_01357}	Name=ndhJ {ECO:0000255|HAMAP-Rule:MF_01357};	P19124;
P19656			NLTP_MAIZE	P19656	Non-specific lipid-transfer protein		P19656;
P19862			PHYA1_MAIZE	P19862	Phytochrome A	Name=PHYA1;	P19862;
P19950			RS141_MAIZE	P19950	40S ribosomal protein S14		P19950;
P21569			CYPH_MAIZE	P21569	Peptidyl-prolyl cis-trans isomerase	Name=CYP; Synonyms=ROT1;	P21569;
P22275			TBA3_MAIZE	P22275	Tubulin alpha-3 chain	Name=TUBA3; Synonyms=TUA3;	P22275;
P23111			CDC2_MAIZE	P23111	Cell division control protein 2 homolog	Name=CDC2;	P23111;
P23225			GLTB_MAIZE	P23225	Ferredoxin-dependent glutamate synthase, chloroplastic	Name=GLSF;	P23225;
P23345			SODC4_MAIZE	P23345	Superoxide dismutase [Cu-Zn] 4A	Name=SODCC.3; Synonyms=SOD4A;	P23345;
P23346			SODC5_MAIZE	P23346	Superoxide dismutase [Cu-Zn] 4AP	Name=SODCC.2; Synonyms=SOD4AP;	P23346;
P24067			BIP2_MAIZE	P24067	Luminal-binding protein 2	Name=BIPE2;	P24067;
P24631			HSP21_MAIZE	P24631	17.5 kDa class II heat shock protein		P24631;
P24993			PSBH_MAIZE	P24993	Photosystem II reaction center protein H {ECO:0000255|HAMAP-Rule:MF_00752}	Name=psbH {ECO:0000255|HAMAP-Rule:MF_00752};	P24993;
P25460			RS11_MAIZE	P25460	40S ribosomal protein S11	Name=RPS11;	P25460;
P25709			NDHH_MAIZE	P25709	NAD(P)H-quinone oxidoreductase subunit H, chloroplastic {ECO:0000255|HAMAP-Rule:MF_01358}	Name=ndhH {ECO:0000255|HAMAP-Rule:MF_01358};	P25709;
P26216			PGLR1_MAIZE	P26216	Exopolygalacturonase	Name=PG1;andName=PG2;andName=PG3;andName=PG6;andName=PG14;	P26216;
P26301			ENO1_MAIZE	P26301	Enolase 1	Name=ENO1; Synonyms=PGH1;	P26301;
P27347			MNB1B_MAIZE	P27347	DNA-binding protein MNB1B	Name=MNB1B;	P27347;
P27497			CB29_MAIZE	P27497	Chlorophyll a-b binding protein M9, chloroplastic	Name=CAB-M9;	P27497;
P27923			RS27A_MAIZE	P27923	Ubiquitin-40S ribosomal protein S27a	Name=UBF9; Synonyms=RPS27A;	P27923; O82079; P03993; P69319;
P29022			CHIA_MAIZE	P29022	Endochitinase A {ECO:0000303|PubMed:1551872}		P29022;
P29036			FRI1_MAIZE	P29036	Ferritin-1, chloroplastic	Name=FER1;	P29036; Q43258;
P29185			CH61_MAIZE	P29185	Chaperonin CPN60-1, mitochondrial	Name=CPN60I; Synonyms=CPNA;	P29185; Q43251; Q43252;
P29390			FRI2_MAIZE	P29390	Ferritin-2, chloroplastic	Name=FER2;	P29390; Q43259;
P30792			PMGI_MAIZE	P30792	2,3-bisphosphoglycerate-independent phosphoglycerate mutase		P30792;
P31726			CYT1_MAIZE	P31726	Cystatin-1	Name=RAMDAZC7;	P31726;
P35081			PROF1_MAIZE	P35081	Profilin-1	Name=PRO1; Synonyms=PRF1;	P35081;
P35082			PROF2_MAIZE	P35082	Profilin-2	Name=PRO2; Synonyms=PRF2;	P35082;
P35339			PGLR3_MAIZE	P35339	Exopolygalacturonase	Name=PG2C;	P35339;
P38559			GLNA1_MAIZE	P38559	Glutamine synthetase root isozyme 1	Name=GLN6; Synonyms=GS1-1;	P38559;
P38563			GLNA5_MAIZE	P38563	Glutamine synthetase root isozyme 5	Name=GS1-5;	P38563;
P40280			H2A_MAIZE	P40280	Histone H2A		P40280;
P42057			VDAC_MAIZE	P42057	Outer plastidial membrane protein porin	Name=POR1;	P42057;
P42856			ZB14_MAIZE	P42856	14 kDa zinc-binding protein	Name=ZBP14; Synonyms=PKCI;	P42856;
P42895			ENO2_MAIZE	P42895	Enolase 2	Name=ENO2;	P42895;
P43188			KADC_MAIZE	P43188	Adenylate kinase, chloroplastic	Name=ADK1;	P43188;
P43284			TRPB2_MAIZE	P43284	Tryptophan synthase beta chain 2, chloroplastic	Name=TSB2; Synonyms=ORP2;	P43284;
P45633			RL10_MAIZE	P45633	60S ribosomal protein L10	Name=RPL10;	P45633;
P46252			RLA2A_MAIZE	P46252	60S acidic ribosomal protein P2A	Name=RPP2A; Synonyms=RPP2;	P46252;
P46420			GSTF4_MAIZE	P46420	Glutathione S-transferase 4	Name=GST4;	P46420;
P46617			CYF_MAIZE	P46617	Cytochrome f	Name=petA;	P46617;
P48183			PSBA_MAIZE	P48183	Photosystem II protein D1 {ECO:0000255|HAMAP-Rule:MF_01379}	Name=psbA {ECO:0000255|HAMAP-Rule:MF_01379};	P48183; Q546V9;
P48184			PSBD_MAIZE	P48184	Photosystem II D2 protein {ECO:0000255|HAMAP-Rule:MF_01383}	Name=psbD {ECO:0000255|HAMAP-Rule:MF_01383};	P48184;
P48186			ATPF_MAIZE	P48186	ATP synthase subunit b, chloroplastic {ECO:0000255|HAMAP-Rule:MF_01398}	Name=atpF {ECO:0000255|HAMAP-Rule:MF_01398};	P48186;
P48187			PSBC_MAIZE	P48187	Photosystem II CP43 reaction center protein {ECO:0000255|HAMAP-Rule:MF_01496}	Name=psbC {ECO:0000255|HAMAP-Rule:MF_01496};	P48187;
P49036			SUS2_MAIZE	P49036	Sucrose synthase 2	Name=SUS1;	P49036;
P49076			ARF_MAIZE	P49076	ADP-ribosylation factor	Name=ARF1;	P49076;
P49079			AKH1_MAIZE	P49079	Bifunctional aspartokinase/homoserine dehydrogenase 1, chloroplastic	Name=AKHSDH1;	P49079;
P49080			AKH2_MAIZE	P49080	Bifunctional aspartokinase/homoserine dehydrogenase 2, chloroplastic	Name=AKHSDH2;	P49080;
P49081			MASY_MAIZE	P49081	Malate synthase, glyoxysomal	Name=LIP;	P49081;
P49087			VATA_MAIZE	P49087	V-type proton ATPase catalytic subunit A		P49087; Q41775;
P49101			CDPK2_MAIZE	P49101	Calcium-dependent protein kinase 2	Name=CPK2; Synonyms=CDPK2;	P49101;
P49104			RAB2B_MAIZE	P49104	Ras-related protein Rab-2-B	Name=RAB2B;	P49104;
P49106			14331_MAIZE	P49106	14-3-3-like protein GF14-6	Name=GRF1;	P49106;
P49133			TPT_MAIZE	P49133	Triose phosphate/phosphate translocator, chloroplastic	Name=TPT;	P49133;
P49174			INVA_MAIZE	P49174	Beta-fructofuranosidase, cell wall isozyme		P49174;
P49178			GBB_MAIZE	P49178	Guanine nucleotide-binding protein subunit beta	Name=GB1;	P49178;
P49235			HGGL1_MAIZE	P49235	4-hydroxy-7-methoxy-3-oxo-3,4-dihydro-2H-1,4-benzoxazin-2-yl glucoside beta-D-glucosidase 1, chloroplastic	Name=GLU1;	P49235;
P49249			IN22_MAIZE	P49249	IN2-2 protein	Name=IN2-2; Synonyms=SAF2;	P49249;
P51059			CAPP2_MAIZE	P51059	Phosphoenolpyruvate carboxylase 2	Name=PEP4; Synonyms=PEP;	P51059;
P51421			RL32_MAIZE	P51421	60S ribosomal protein L32	Name=RPL32;	P51421;
P51425			RL39_MAIZE	P51425	60S ribosomal protein L39	Name=RPL39; Synonyms=EC2E;	P51425;
P52580			IFRH_MAIZE	P52580	Isoflavone reductase homolog IRL	Name=IRL;	P52580;
P52588			PDI_MAIZE	P52588	Protein disulfide-isomerase	Name=PDI;	P52588;
P54348			H2B5_MAIZE	P54348	Histone H2B.5		P54348;
P55005			AMYB_MAIZE	P55005	Beta-amylase	Name=BMY1;	P55005;
P55240			GLGS_MAIZE	P55240	Glucose-1-phosphate adenylyltransferase small subunit	Name=GLG1;	P55240;
P56330			SUI1_MAIZE	P56330	Protein translation factor SUI1 homolog	Name=TIF;	P56330;
P58738			EXPB1_MAIZE	P58738	Expansin-B1	Name=EXPB1; Synonyms=EXPB1A;	P58738; Q84UA7;
Q41811			H43_MAIZE	Q41811	Histone H4.3	Name=H4;	Q41811;
P69246			H32_MAIZE	P69246	Histone H3.2	Name=H3C2;andName=H3C3;andName=H3C4;	P69246; P05203; P05329; P05330; Q53X03;
P69388			PSBE_MAIZE	P69388	Cytochrome b559 subunit alpha {ECO:0000255|HAMAP-Rule:MF_00642}	Name=psbE {ECO:0000255|HAMAP-Rule:MF_00642};	P69388; P05169; P10879; Q95H57;
P80607			RGP1_MAIZE	P80607	Probable UDP-arabinopyranose mutase 1 {ECO:0000305}	Name=UPTG {ECO:0000303|Ref.4};	P80607; Q9SAQ2;
P80608			CYSK_MAIZE	P80608	Cysteine synthase		P80608;
P80610			UC04_MAIZE	P80610	Unknown protein from spot 128 of 2D-PAGE of etiolated coleoptile		P80610;
P93629			ADHX_MAIZE	P93629	Alcohol dehydrogenase class-3	Name=FDH;	P93629;
P93703			C71C3_MAIZE	P93703	Cytochrome P450 71C3	Name=CYP71C3; Synonyms=BX5;	P93703; Q43256;
P93804			PGMC1_MAIZE	P93804	Phosphoglucomutase, cytoplasmic 1		P93804;
P93805			PGMC2_MAIZE	P93805	Phosphoglucomutase, cytoplasmic 2		P93805;
Q01526			14332_MAIZE	Q01526	14-3-3-like protein GF14-12	Name=GRF2;	Q01526;
Q05327			PDC3_MAIZE	Q05327	Pyruvate decarboxylase 3	Name=PDC3;	Q05327;
Q05737			YPTM2_MAIZE	Q05737	GTP-binding protein YPTM2	Name=YPTM2;	Q05737;
Q05761			RS13_MAIZE	Q05761	40S ribosomal protein S13	Name=RPS13;	Q05761;
Q06509			COMT1_MAIZE	Q06509	Caffeic acid 3-O-methyltransferase		Q06509;
Q07154			EXPB9_MAIZE	Q07154	Expansin-B9	Name=EXPB9; Synonyms=EXPB1B;	Q07154; Q84UA8;
Q08047			GLGB_MAIZE	Q08047	1,4-alpha-glucan-branching enzyme 2, chloroplastic/amyloplastic	Name=SBE1;	Q08047;
Q08062			MDHC_MAIZE	Q08062	Malate dehydrogenase, cytoplasmic {ECO:0000303|Ref.1}		Q08062; B2ZAF9; C4IZW9;
Q08066			RL19_MAIZE	Q08066	60S ribosomal protein L19	Name=RPL19;	Q08066;
Q08069			RS8_MAIZE	Q08069	40S ribosomal protein S8	Name=RPS8;	Q08069;
Q08275			HSP23_MAIZE	Q08275	17.0 kDa class II heat shock protein	Name=HSP18;	Q08275;
Q08277			HSP82_MAIZE	Q08277	Heat shock protein 82	Name=HSP82;	Q08277;
Q08704			CFI_MAIZE	Q08704	Chalcone--flavonone isomerase	Name=CHI; Synonyms=CHI1;	Q08704;
Q09054			G3PC2_MAIZE	Q09054	Glyceraldehyde-3-phosphate dehydrogenase 2, cytosolic	Name=GAPC2; Synonyms=GPC2;	Q09054;
Q10717			CYSP2_MAIZE	Q10717	Cysteine proteinase 2	Name=CCP2;	Q10717;
Q195N6			PDRP1_MAIZE	Q195N6	Pyruvate, phosphate dikinase regulatory protein, chloroplastic	Name=PDRP1;	Q195N6;
Q1ZYQ8			EXB10_MAIZE	Q1ZYQ8	Expansin-B10	Name=EXPB10;	Q1ZYQ8;
Q41048			PSBQ1_MAIZE	Q41048	Oxygen-evolving enhancer protein 3-1, chloroplastic	Name=PSBQ1; Synonyms=PSBQ;	Q41048;
Q41739			THI42_MAIZE	Q41739	Thiamine thiazole synthase 2, chloroplastic {ECO:0000255|HAMAP-Rule:MF_03158}	Name=THI1-2 {ECO:0000255|HAMAP-Rule:MF_03158};	Q41739;
Q41741			IF4A_MAIZE	Q41741	Eukaryotic initiation factor 4A		Q41741;
Q41745			LPAT_MAIZE	Q41745	1-acyl-sn-glycerol-3-phosphate acyltransferase PLS1	Name=PLS1;	Q41745;
Q41761			HGGL2_MAIZE	Q41761	4-hydroxy-7-methoxy-3-oxo-3,4-dihydro-2H-1,4-benzoxazin-2-yl glucoside beta-D-glucosidase 2, chloroplastic	Name=GLU2;	Q41761;
Q41764			ADF3_MAIZE	Q41764	Actin-depolymerizing factor 3	Name=ADF3; Synonyms=ABP3;	Q41764;
Q41768			ILVB1_MAIZE	Q41768	Acetolactate synthase 1, chloroplastic	Name=ALS1; Synonyms=AHAS108;	Q41768;
Q41769			ILVB2_MAIZE	Q41769	Acetolactate synthase 2, chloroplastic	Name=ALS2; Synonyms=AHAS109;	Q41769;
Q41782			TBB4_MAIZE	Q41782	Tubulin beta-4 chain	Name=TUBB4; Synonyms=TUB4;	Q41782; Q43696;
Q41783			TBB6_MAIZE	Q41783	Tubulin beta-6 chain	Name=TUBB6; Synonyms=TUB6;	Q41783;
Q41784			TBB7_MAIZE	Q41784	Tubulin beta-7 chain	Name=TUBB7; Synonyms=TUB7;	Q41784;
Q41803			EF1A_MAIZE	Q41803	Elongation factor 1-alpha	Name=EF1A;	Q41803;
Q41874			TBG3_MAIZE	Q41874	Tubulin gamma-3 chain	Name=TUBG3; Synonyms=TUBC, TUBG;	Q41874;
Q41852			RS21_MAIZE	Q41852	40S ribosomal protein S21	Name=RPS21;	Q41852;
Q41864			TRXM_MAIZE	Q41864	Thioredoxin M-type, chloroplastic	Name=TRM1;	Q41864;
Q43247			G3PC3_MAIZE	Q43247	Glyceraldehyde-3-phosphate dehydrogenase 3, cytosolic	Name=GAPC3; Synonyms=GPC3;	Q43247; Q06476;
Q43250			C71C1_MAIZE	Q43250	3-hydroxyindolin-2-one monooxygenase	Name=CYP71C1; Synonyms=BX4;	Q43250; Q43254;
Q43255			C71C2_MAIZE	Q43255	indolin-2-one monooxygenase	Name=CYP71C2; Synonyms=BX3;	Q43255; O04991;
Q43266			PCNA_MAIZE	Q43266	Proliferating cell nuclear antigen	Name=PCNA;	Q43266;
Q43270			PLDA1_MAIZE	Q43270	Phospholipase D alpha 1	Name=PLD1;	Q43270;
Q43298			CH62_MAIZE	Q43298	Chaperonin CPN60-2, mitochondrial	Name=CPN60II; Synonyms=CPNB;	Q43298; Q43253;
Q43695			TBB3_MAIZE	Q43695	Tubulin beta-3 chain	Name=TUBB3; Synonyms=TUB3;	Q43695;
Q9LFN6			RH56_ARATH	Q9LFN6	DEAD-box ATP-dependent RNA helicase 56	Name=RH56; Synonyms=UAP56B; OrderedLocusNames=At5g11200;ORFNames=F2I11.90;	Q9LFN6; Q93VJ8;
Q56YU0			AL2C4_ARATH	Q56YU0	Aldehyde dehydrogenase family 2 member C4	Name=ALDH2C4; Synonyms=REF1; OrderedLocusNames=At3g24503;ORFNames=MOB24.3;	Q56YU0; Q9LV57;
Q6JB11			MEG5_MAIZE	Q6JB11	Protein MATERNALLY EXPRESSED GENE 5	Name=MEG5;	Q6JB11;
Q6XZ78			SCRK2_MAIZE	Q6XZ78	Fructokinase-2	Name=FRK2;	Q6XZ78;
Q6XZ79			SCRK1_MAIZE	Q6XZ79	Fructokinase-1	Name=FRK1;	Q6XZ79;
Q7SIC9			TKTC_MAIZE	Q7SIC9	Transketolase, chloroplastic		Q7SIC9;
Q84RL7			PIP21_MAIZE	Q84RL7	Aquaporin PIP2-1	Name=PIP2-1;	Q84RL7; Q9ATM9;
Q84TC2			BX6_MAIZE	Q84TC2	DIBOA-glucoside dioxygenase BX6	Name=BX6;	Q84TC2;
Q84W89			RH37_ARATH	Q84W89	DEAD-box ATP-dependent RNA helicase 37	Name=RH37; OrderedLocusNames=At2g42520; ORFNames=F14N22.21;	Q84W89; Q9SIN6;
Q84Y01			ITPK1_MAIZE	Q84Y01	Inositol-tetrakisphosphate 1-kinase 1	Name=ITPK1; Synonyms=LPA2;	Q84Y01;
Q8H136			RH14_ARATH	Q8H136	DEAD-box ATP-dependent RNA helicase 14	Name=RH14; Synonyms=DRH1; OrderedLocusNames=At3g01540;ORFNames=F4P13.9;	Q8H136; O64430; Q8W4F5; Q93WJ3;
Q8H6A5			TCTP_MAIZE	Q8H6A5	Translationally-controlled tumor protein homolog	Name=TCTP;	Q8H6A5;
Q8RXK6			RH8_ARATH	Q8RXK6	DEAD-box ATP-dependent RNA helicase 8	Name=RH8; OrderedLocusNames=At4g00660; ORFNames=F6N23.6;	Q8RXK6; O65275; Q9ZS12;
Q8S528			AL2B7_ARATH	Q8S528	Aldehyde dehydrogenase family 2 member B7, mitochondrial	Name=ALDH2B7; Synonyms=ALDH3; OrderedLocusNames=At1g23800;ORFNames=F5O8.33, F5O8.35;	Q8S528; Q94C67; Q9ZUB6;
Q8VXG7			PALY_MAIZE	Q8VXG7	Phenylalanine/tyrosine ammonia-lyase	Name=PAL1;	Q8VXG7;
Q8W2B7			BX8_MAIZE	Q8W2B7	DIMBOA UDP-glucosyltransferase BX8	Name=Bx8;	Q8W2B7;
Q8W4R3			RH30_ARATH	Q8W4R3	DEAD-box ATP-dependent RNA helicase 30	Name=RH30; OrderedLocusNames=At5g63120; ORFNames=MDC12.8;	Q8W4R3; Q0WVX4; Q9FML1; Q9ZRZ7;
Q8W519			MMT1_MAIZE	Q8W519	Methionine S-methyltransferase	Name=MMT1; Synonyms=MMT;	Q8W519; Q9XFH6;
Q94A52			RH2_ARATH	Q94A52	Eukaryotic initiation factor 4A-III homolog {ECO:0000305}	Name=EIF4A3 {ECO:0000303|PubMed:19435936};Synonyms=RH2 {ECO:0000303|PubMed:24743583};OrderedLocusNames=At3g19760 {ECO:0000312|Araport:AT3G19760};ORFNames=MMB12.25 {ECO:0000312|EMBL:BAB02563.1}, MMB12.4;	Q94A52; Q9ZS14;
Q9AQU5			PIP13_MAIZE	Q9AQU5	Aquaporin PIP1-3/PIP1-4	Name=PIP1-3;andName=PIP1-4;	Q9AQU5;
Q9ATM2			SIP12_MAIZE	Q9ATM2	Aquaporin SIP1-2	Name=SIP1-2; Synonyms=SIP1B;	Q9ATM2;
Q9ATM7			PIP23_MAIZE	Q9ATM7	Aquaporin PIP2-3	Name=PIP2-3; Synonyms=PIP2C;	Q9ATM7;
Q9FJR0			RENT1_ARATH	Q9FJR0	Regulator of nonsense transcripts 1 homolog	Name=UPF1; Synonyms=LBA1; OrderedLocusNames=At5g47010;ORFNames=MQD22.15;	Q9FJR0; Q8S3K7;
Q9FPK7			INO1_MAIZE	Q9FPK7	Inositol-3-phosphate synthase		Q9FPK7; O65196;
Q9FUM8			HMT3_MAIZE	Q9FUM8	Homocysteine S-methyltransferase 3	Name=HMT-3;	Q9FUM8;
Q9FYS5			HMGYA_MAIZE	Q9FYS5	HMG-Y-related protein A	Name=HMGIY2 {ECO:0000303|PubMed:11278346};ORFNames=GRMZM2G106133 {ECO:0000305}, Zm.66288;	Q9FYS5;
Q9LEF5			SSRP1_MAIZE	Q9LEF5	FACT complex subunit SSRP1	Name=SSRP1;	Q9LEF5;
Q9M4U4			HDT3_MAIZE	Q9M4U4	Histone deacetylase HDT3	Name=HDT3; Synonyms=HD2C;	Q9M4U4;
Q9M4U5			HDT2_MAIZE	Q9M4U5	Histone deacetylase HDT2	Name=HDT2; Synonyms=HD2B;	Q9M4U5;
Q9SE94			MTHR1_MAIZE	Q9SE94	Methylenetetrahydrofolate reductase 1		Q9SE94;
Q9SLZ0			PCKA_MAIZE	Q9SLZ0	Phosphoenolpyruvate carboxykinase (ATP)		Q9SLZ0;
Q9SP22			CALR_MAIZE	Q9SP22	Calreticulin	Name=CRT;	Q9SP22;
Q9SU63			AL2B4_ARATH	Q9SU63	Aldehyde dehydrogenase family 2 member B4, mitochondrial	Name=ALDH2B4; Synonyms=ALDH2; OrderedLocusNames=At3g48000;ORFNames=T17F15.130;	Q9SU63; Q42090;
Q9SX04			MCM32_MAIZE	Q9SX04	DNA replication licensing factor MCM3 homolog 2	Name=ROA2;	Q9SX04;
Q9TJN6			RR17_MAIZE	Q9TJN6	30S ribosomal protein S17, chloroplastic	Name=RPS17; Synonyms=HCF60;	Q9TJN6;
Q9XF59			PIP12_MAIZE	Q9XF59	Aquaporin PIP1-2	Name=PIP1-2;	Q9XF59;
Q9XGD5			CAMT2_MAIZE	Q9XGD5	Caffeoyl-CoA O-methyltransferase 2	Name=CCOAOMT2;	Q9XGD5;
Q9XHR2			EIF3A_MAIZE	Q9XHR2	Eukaryotic translation initiation factor 3 subunit A {ECO:0000255|HAMAP-Rule:MF_03000}	Name=TIF3A1; Synonyms=IF3A;	Q9XHR2;
Q9ZT00			RCA_MAIZE	Q9ZT00	Ribulose bisphosphate carboxylase/oxygenase activase, chloroplastic	Name=RCA1; Synonyms=RCA;	Q9ZT00;
Q9ZT66			E134_MAIZE	Q9ZT66	Endo-1,3		Q9ZT66;

## Sheet: Cellular component
Analysis: Cellular component
Dataset name: BC
Number of proteins in the dataset: 238
Number of proteins in the dataset (which are available in Cellular component database) :209
Number of proteins in background: 41689
Is analysis quantitative: No
						Corrected p-values
Cellular component	No. of genes in the dataset	No.of genes in the background dataset	Percentage of proteins	Fold enrichment	P-value (Hypergeometric test)	Bonferroni method	BH method	Q-value (Storey-Tibshirani method)
extracellular region	12	1810	5.04202	1.16222	0.339667	1	1	1	A5H453; A5H8G4; O82106; P0C1Y5; P26216; P35339; P49174; P58738; P80607; Q07154; Q1ZYQ8; Q9ZT66;
cytosol	10	1795	4.20168	0.976773	0.576416	1	1	1	B6TTW1; F4IHS2; Q9LZQ9; P08440; P21569; Q56YU0; Q6XZ78; Q9AQU5; Q9FJR0; Q9XF59;
mitochondrion	7	1392	2.94118	0.882068	0.684875	1	1	1	B6TVL4; P09233; P10581; P15719; P18123; Q43298; Q9SU63;
nucleus	16	5364	6.72269	0.522791	0.999254	1	1	1	B2LXS7; B6TZD1; F4IHS2; F4KBP5; P27347; P27923; P40280; P49106; P54348; Q41811; P69246; Q01526; Q43266; Q94A52; Q9LEF5; Q9SX04;
plasma membrane	9	2958	3.78151	0.533521	0.989053	1	1	1	B4FBQ7; P49178; Q05737; Q08062; Q84RL7; Q9AQU5; Q9ATM7; Q9FJR0; Q9XF59;
plasmodesma	4	765	1.68067	0.918129	0.637747	1	1	1	B6TZD1; F4KBP5; P80607; Q9FJR0;
cytoplasm	57	3544	23.9496	2.81762	5.4417e-13	3.97244e-10	3.97244e-10	2.52722e-09	A4KA61; A4KA58; B4G0F3; B6TZD1; F4JAA5; Q9FR39; Q9LZQ9; O23888; O48556; P00333; P02582; P04707; P04711; P08735; P11428; P12863; P14641; P18025; P18026; P22275; P23345; P23346; P24631; P30792; P35081; P35082; P38559; P38563; P51059; P52580; P80608; P93629; P93804; P93805; Q08275; Q08277; Q09054; Q41764; Q41782; Q41783; Q41784; Q41803; Q43247; Q43695; Q9LFN6; Q84TC2; Q84W89; Q8H136; Q8H6A5; Q8VXG7;…
Golgi apparatus	2	710	0.840336	0.495859	0.914693	1	1	1	P49076; P80607;
vacuole	3	684	1.2605	0.77078	0.750881	1	1	1	A5H8G4; F4JAA5; Q10717;
cell wall	8	914	3.36134	1.535	0.154272	1	1	1	P0C1Y5; P26216; P35339; P49174; P58738; P80607; Q07154; Q1ZYQ8;
chloroplast	25	8175	10.5042	0.535861	0.999951	1	1	1	O24578; O81220; P00874; P04713; P05348; P09315; P11155; P16243; P17788; P29036; P29390; P43188; P43284; P49079; P49080; P49235; P55240; Q08047; Q41739; Q41761; Q41768; Q41769; Q41864; Q9SU63; Q9TJN6;
integral component of membrane	28	9869	11.7647	0.497125	0.999999	1	1	1	B4FBQ7; B6TVL4; O64964; P04709; P04966; P04967; P05641; P05642; P05643; P06671; P12329; P24993; P27497; P48183; P48184; P48186; P48187; P49133; P69388; P93703; Q41745; Q43250; Q43255; Q84RL7; Q9AQU5; Q9ATM2; Q9ATM7; Q9XF59;
nucleolus	10	496	4.20168	3.53484	0.000620126	0.452692	0.113173	0.719994	Q9LZQ9; Q9LFN6; Q84W89; Q8H136; Q8RXK6; Q8W4R3; Q94A52; Q9FYS5; Q9M4U4; Q9M4U5;
peroxisome	1	224	0.420168	0.789733	0.723604	1	1	1	Q84W89;
endoplasmic reticulum	1	639	0.420168	0.276847	0.974949	1	1	1	Q9XF59;
apoplast	1	635	0.420168	0.278591	0.974359	1	1	1	P15719;
chloroplast stroma	6	1093	2.52101	0.963112	0.595118	1	1	1	B2LXS7; C0PF72; P15719; P23225; Q195N6; Q9ZT00;
membrane	6	1114	2.52101	0.944956	0.613594	1	1	1	P0C1Y5; P58738; Q07154; Q1ZYQ8; Q43270; Q94A52;
chloroplast envelope	3	573	1.2605	0.920091	0.637284	1	1	1	P04966; P04967; P15719;
mitochondrial matrix	4	171	1.68067	4.10723	0.0169879	1	0.95628	1	P09233; P29185; Q8S528; Q9SU63;
amyloplast	3	82	1.2605	6.42874	0.0116846	1	0.802929	1	P04713; P55240; Q08047;
intracellular	2	289	0.840336	1.21817	0.492333	1	1	1	P19862; Q84Y01;
plastoglobule	2	125	0.840336	2.81629	0.16011	1	1	1	P04966; P04967;
chloroplast thylakoid membrane	26	6485	10.9244	0.702516	0.984072	1	1	1	B6TVL4; O65107; P00827; P00835; P04966; P04967; P05022; P05641; P05642; P05643; P06671; P0C1M0; P11601; P12329; P19124; P24993; P25709; P27497; P46617; P48183; P48184; P48186; P48187; P69388; Q41048; Q7SIC9;
chloroplast membrane	1	294	0.420168	0.601708	0.815332	1	1	1	P49133;
mitochondrial inner membrane	2	348	0.840336	1.01165	0.592278	1	1	1	P04709; P05494;
cytoskeleton	6	330	2.52101	3.18988	0.0120989	1	0.802929	1	A4KA61; A4KA58; Q9FR39; P02582; P35081; P35082;
endoplasmic reticulum lumen	4	98	1.68067	7.16639	0.00245929	1	0.299214	1	P13689; P24067; P52588; Q9SP22;
plant-type vacuole membrane	1	156	0.420168	1.13395	0.591317	1	1	1	O64964;
glyoxysome	1	61	0.420168	2.89966	0.294956	1	1	1	P49081;
actin cytoskeleton	1	41	0.420168	4.31378	0.209311	1	1	1	Q41764;
thylakoid	1	223	0.420168	0.793274	0.722008	1	1	1	P15719;
nucleoplasm	1	125	0.420168	1.41515	0.511654	1	1	1	Q94A52;
protein complex	8	48	3.36134	29.2232	3.10807e-10	2.26889e-07	1.13444e-07	7.21721e-07	P04907; P08735; P12653; P46420; Q09054; Q43247; Q84RL7; Q9XF59;
mitochondrial outer membrane	1	38	0.420168	4.65425	0.1956	1	1	1	P42057;
mitochondrial membrane	1	137	0.420168	1.29121	0.544177	1	1	1	P05494;
chromosome	1	71	0.420168	2.49131	0.334249	1	1	1	Q9LEF5;
extrinsic component of membrane	1	78	0.420168	2.26776	0.360448	1	1	1	Q41048;
microtubule	9	358	3.78151	4.40815	0.0002383	0.173959	0.0579864	0.368903	P14641; P18025; P18026; P22275; Q41782; Q41783; Q41784; Q41874; Q43695;
spliceosomal complex	2	83	0.840336	4.24123	0.0817748	1	1	1	Q9LZQ9; Q9LFN6;
mitochondrial proton-transporting ATP synthase complex, catalytic core F(1)	1	13	0.420168	13.5979	0.0717365	1	1	1	P19023;
proton-transporting ATP synthase complex, catalytic core F(1)	5	504	2.10084	1.7411	0.162933	1	1	1	P00827; P00835; P05022; P05494; P0C1M0;
proton-transporting ATP synthase complex, coupling factor F(o)	1	455	0.420168	0.3888	0.927149	1	1	1	P48186;
nuclear speck	1	81	0.420168	2.18378	0.37136	1	1	1	Q94A52;
P-body	2	58	0.840336	6.06903	0.0435286	1	1	1	Q8RXK6; Q9FJR0;
pore complex	1	36	0.420168	4.91275	0.186328	1	1	1	P42057;
catalytic step 2 spliceosome	1	34	0.420168	5.20165	0.176949	1	1	1	Q94A52;
cytoplasmic stress granule	1	23	0.420168	7.68831	0.123411	1	1	1	Q8RXK6;
photosystem II	8	968	3.36134	1.44937	0.191063	1	1	1	P05641; P06671; P12329; P24993; P27497; P48183; P48184; P48187;
photosystem I	7	844	2.94118	1.45478	0.209569	1	1	1	O65107; P04966; P04967; P06671; P11601; P12329; P27497;
ribosome	12	1891	5.04202	1.11244	0.395667	1	1	1	O22424; O48558; P19950; P25460; P27923; P45633; P51421; P51425; Q05761; Q08066; Q41852; Q9TJN6;
integral component of mitochondrial membrane	1	2	0.420168	88.014	0.0113854	1	0.802929	1	P42057;
mitochondrial intermembrane space	1	81	0.420168	2.18378	0.37136	1	1	1	B6TB21;
integral component of thylakoid membrane	1	128	0.420168	1.38199	0.519996	1	1	1	P46617;
nucleosome	5	219	2.10084	4.00682	0.00869718	1	0.802929	1	P40280; P54348; Q41811; P69246; Q9FYS5;
eukaryotic translation initiation factor 3 complex	1	13	0.420168	13.5979	0.0717365	1	1	1	Q9XHR2;
phosphopyruvate hydratase complex	2	13	0.840336	27.0611	0.00242865	1	0.299214	1	P26301; P42895;
gamma-tubulin complex	1	14	0.420168	12.6273	0.0770375	1	1	1	Q41874;
Ski complex	1	3	0.420168	58.7735	0.0170296	1	0.95628	1	F4JAA5;
MCM complex	1	21	0.420168	8.42019	0.11331	1	1	1	Q9SX04;
exon-exon junction complex	1	6	0.420168	29.4356	0.0337705	1	1	1	Q94A52;
plastid outer membrane	1	8	0.420168	22.0859	0.044773	1	1	1	P42057;
endoplasmic reticulum-Golgi intermediate compartment membrane	1	10	0.420168	17.6731	0.0556507	1	1	1	P49104;
photosystem II oxygen evolving complex	1	83	0.420168	2.13117	0.378531	1	1	1	Q41048;
photosystem II reaction center	1	1228	0.420168	0.144061	0.999204	1	1	1	P69388;
cytosolic large ribosomal subunit	4	180	1.68067	3.90188	0.0200902	1	1	1	O24413; O24415; O24573; P46252;
large ribosomal subunit	2	474	0.840336	0.742737	0.755073	1	1	1	O48557; P17788;
chloroplast ribosome	1	2	0.420168	88.014	0.0113854	1	0.802929	1	Q08069;
proton-transporting V-type ATPase, V1 domain	1	24	0.420168	7.3681	0.128418	1	1	1	P49087;

## Sheet: Molecular function
Analysis: Molecular function
Dataset name: BC
Number of proteins in the dataset: 238
Number of proteins in the dataset (which are available in Molecular function database) :225
Number of proteins in background: 41689
Is analysis quantitative: No
						Corrected p-values
Molecular function	No. of genes in the dataset	No.of genes in the background dataset	Percentage of proteins	Fold enrichment	P-value (Hypergeometric test)	Bonferroni method	BH method	Q-value (Storey-Tibshirani method)
zinc ion binding	7	683	2.94118	1.7977	0.0981227	1	1	1	O24562; P00333; P04707; P13689; P93629; Q9FJR0; Q9FUM8;
metal ion binding	29	5156	12.1849	0.985508	0.563855	1	1	1	A5H453; A5H8G4; B6TB21; F4KBP5; O24578; P04966; P04967; P06671; P11155; P11428; P11601; P12329; P16243; P18123; P23225; P23345; P23346; P27497; P27923; P48183; P48184; P48187; P69388; Q05327; Q41739; Q84TC2; Q9M4U4; Q9M4U5; Q9XGD5;
ATP binding	41	4173	17.2269	1.72134	0.000407942	1	0.07984	0.516406	F4IHS2; F4JAA5; F4KBP5; Q9LZQ9; P00827; P02582; P05022; P05494; P11143; P11155; P19023; P23111; P24067; P29185; P38559; P38563; P43188; P48186; P49079; P49080; P49087; P49101; P55240; Q08277; Q195N6; Q41741; Q43298; Q9LFN6; Q6XZ78; Q6XZ79; Q84W89; Q84Y01; Q8H136; Q8RXK6; Q8W4R3; Q94A52; Q9FJR0; Q9SLZ0; Q9SU63; Q9SX04; Q9ZT00;
protein domain specific binding	2	122	0.840336	2.88554	0.154125	1	1	1	P49106; Q01526;
ATPase binding	1	10	0.420168	17.6731	0.0556507	1	1	1	P29185;
DNA binding	15	2568	6.30252	1.02379	0.501599	1	1	1	B2LXS7; B6TTW1; F4IHS2; F4KBP5; P10581; P40280; P49106; P54348; Q41811; P69246; Q01526; Q43266; Q9FJR0; Q9LEF5; Q9SX04;
protein complex binding	6	13	2.52101	80.914	5.3937e-11	1.47788e-07	1.47788e-07	9.55891e-07	O24413; O24415; O24573; P46252; P49106; Q01526;
pyridoxal phosphate binding	1	180	0.420168	0.982768	0.643984	1	1	1	Q8W519;
catalytic activity	1	29	0.420168	6.09818	0.15303	1	1	1	P42856;
identical protein binding	1	188	0.420168	0.940951	0.659991	1	1	1	B6TTW1;
oxidoreductase activity	4	588	1.68067	1.1945	0.43296	1	1	1	P04966; P04967; P49249; P52580;
protein homodimerization activity	3	281	1.2605	1.87617	0.217083	1	1	1	P04907; P19862; P46420;
protein dimerization activity	2	600	0.840336	0.586765	0.85873	1	1	1	B1P123; Q06509;
hydrolase activity	3	237	1.2605	2.22447	0.154385	1	1	1	Q9M4U4; Q9M4U5; Q9ZT66;
calcium ion binding	5	488	2.10084	1.79819	0.148489	1	1	1	P49101; Q41048; Q43270; Q7SIC9; Q9SP22;
magnesium ion binding	10	1006	4.20168	1.74284	0.0644425	1	1	1	B4G0F3; O48556; P00874; P26301; P42895; P93804; P93805; Q41768; Q41769; Q84Y01;
NAD binding	3	262	1.2605	2.01222	0.189317	1	1	1	P09315; P16243; P25709;
carbohydrate binding	1	403	0.420168	0.438967	0.901581	1	1	1	Q9SP22;
O-methyltransferase activity	1	49	0.420168	3.60963	0.244746	1	1	1	B1P123;
heme binding	9	1333	3.78151	1.18391	0.352127	1	1	1	A5H453; A5H8G4; P05642; P18123; P46617; P69388; P93703; Q43250; Q43255;
iron ion binding	6	729	2.52101	1.444	0.239036	1	1	1	O23888; P05642; P46617; P93703; Q43250; Q43255;
hydrolase activity, hydrolyzing O-glycosyl compounds	1	82	0.420168	2.15715	0.374956	1	1	1	Q08047;
protein serine/threonine kinase activity	2	678	0.840336	0.519262	0.901017	1	1	1	P49101; Q195N6;
methyltransferase activity	1	79	0.420168	2.23906	0.364106	1	1	1	B6TB21;
ATPase activity	2	179	0.840336	1.96673	0.272332	1	1	1	F4IHS2; Q8H136;
transporter activity	5	175	2.10084	5.0142	0.00342235	1	0.360663	1	P04709; P49133; Q9AQU5; Q9ATM2; Q9XF59;
manganese ion binding	3	150	1.2605	3.51457	0.05503	1	1	1	P09233; P30792; Q7SIC9;
4 iron, 4 sulfur cluster binding	3	880	1.2605	0.599108	0.880717	1	1	1	P04966; P04967; P11601;
kinase activity	1	145	0.420168	1.21997	0.564652	1	1	1	P11155;
alcohol dehydrogenase (NAD) activity	3	36	1.2605	14.641	0.0011414	1	0.148926	0.963254	P00333; P04707; P93629;
FAD binding	1	42	0.420168	4.2111	0.213829	1	1	1	O23888;
transferase activity	2	246	0.840336	1.4311	0.410492	1	1	1	P17788; P80608;
transcription regulatory region DNA binding	1	249	0.420168	0.710446	0.76066	1	1	1	P27347;
sequence-specific DNA binding	1	722	0.420168	0.245022	0.984547	1	1	1	Q9FYS5;
auxin binding	1	16	0.420168	11.0499	0.0875494	1	1	1	P13689;
receptor activity	1	35	0.420168	5.05307	0.181652	1	1	1	P13689;
actin binding	3	270	1.2605	1.9526	0.200897	1	1	1	A4KA61; A4KA58; Q41764;
lipid binding	1	395	0.420168	0.447857	0.896923	1	1	1	P19656;
flavin adenine dinucleotide binding	2	207	0.840336	1.70071	0.331114	1	1	1	Q41768; Q41769;
cobalt ion binding	1	45	0.420168	3.93042	0.227231	1	1	1	Q7SIC9;
structural constituent of cytoskeleton	8	134	3.36134	10.4694	1.12609e-06	0.00308548	0.00154274	0.00997847	P14641; P18025; P18026; P22275; Q41782; Q41783; Q41784; Q43695;
mRNA binding	4	282	1.68067	2.49061	0.0789753	1	1	1	Q8RXK6; Q8W4R3; Q94A52; Q9FJR0;
cysteine-type peptidase activity	1	60	0.420168	2.94798	0.290902	1	1	1	Q10717;
S-(hydroxymethyl)glutathione dehydrogenase activity	1	5	0.420168	35.311	0.028222	1	1	1	P93629;
photoreceptor activity	1	48	0.420168	3.68482	0.240405	1	1	1	P19862;
polygalacturonase activity	2	31	0.840336	11.3533	0.0135341	1	0.80616	1	P26216; P35339;
chitin binding	1	112	0.420168	1.5794	0.473809	1	1	1	P29022;
chitinase activity	1	104	0.420168	1.70088	0.449082	1	1	1	P29022;
peroxidase activity	2	232	0.840336	1.51745	0.382464	1	1	1	A5H453; A5H8G4;
protein heterodimerization activity	4	272	1.68067	2.58218	0.0712731	1	1	1	P40280; P54348; Q41811; P69246;
nucleic acid binding	2	134	0.840336	2.62715	0.178305	1	1	1	Q9M4U4; Q9M4U5;
RNA binding	9	1973	3.78151	0.799875	0.797866	1	1	1	B2LXS7; F4JAA5; Q9LZQ9; P10979; P17788; Q9LFN6; Q6JB11; Q84W89; Q8H136;
phosphorelay sensor kinase activity	1	83	0.420168	2.13117	0.378531	1	1	1	P19862;
histone binding	1	70	0.420168	2.5269	0.330419	1	1	1	F4IHS2;
signal transducer activity	1	104	0.420168	1.70088	0.449082	1	1	1	P49178;
aspartate kinase activity	2	8	0.840336	43.9531	0.000888401	1	0.135234	0.874697	P49079; P49080;
homoserine dehydrogenase activity	2	5	0.840336	70.2724	0.000320899	0.879263	0.0676356	0.437468	P49079; P49080;
NADP binding	6	141	2.52101	7.46536	0.000167598	0.459218	0.0382682	0.247519	P08735; P09315; P49079; P49080; Q09054; Q43247;
aldehyde dehydrogenase (NAD) activity	3	14	1.2605	37.6318	6.38398e-05	0.174921	0.0174921	0.113139	Q56YU0; Q8S528; Q9SU63;
coniferyl-aldehyde dehydrogenase activity	1	1	0.420168	175.157	0.00570894	1	0.404844	1	Q56YU0;
2 iron, 2 sulfur cluster binding	2	212	0.840336	1.6606	0.341496	1	1	1	B6TB21; O23888;
electron transfer activity	3	716	1.2605	0.736332	0.777817	1	1	1	O23888; P11601; P46617;
indole-3-acetaldehyde oxidase activity	1	6	0.420168	29.4356	0.0337705	1	1	1	O23888;
oxidoreductase activity, acting on CH-OH group of donors	1	78	0.420168	2.26776	0.360448	1	1	1	O23888;
molybdopterin cofactor binding	1	25	0.420168	7.0735	0.133397	1	1	1	O23888;
fructose-bisphosphate aldolase activity	1	22	0.420168	8.03762	0.118375	1	1	1	P08440;
quinone binding	2	1279	0.840336	0.275263	0.99495	1	1	1	P19124; P25709;
monooxygenase activity	3	855	1.2605	0.616626	0.868397	1	1	1	P00874; P05348; P93703;
oxidoreductase activity, acting on paired donors, with incorporation or reduction of molecular oxygen	1	164	0.420168	1.07864	0.609682	1	1	1	P93703;
amylopectin maltohydrolase activity	1	19	0.420168	9.30606	0.103094	1	1	1	P55005;
beta-amylase activity	1	20	0.420168	8.84099	0.108217	1	1	1	P55005;
oxidoreductase activity, acting on paired donors, with incorporation or reduction of molecular oxygen, 2-oxoglutarate as one donor, and incorporation of one atom each of oxygen into both donors	1	4	0.420168	44.1167	0.0226418	1	1	1	Q84TC2;
protein disulfide isomerase activity	1	51	0.420168	3.46811	0.253355	1	1	1	P52588;
glucose-1-phosphate adenylyltransferase activity	1	34	0.420168	5.20165	0.176949	1	1	1	P55240;
GTPase activity	12	455	5.04202	4.62326	1.40001e-05	0.0383602	0.00639336	0.0413523	P14641; P18025; P18026; P22275; P49104; Q05737; Q41782; Q41783; Q41784; Q41803; Q41874; Q43695;
GTP binding	14	597	5.88235	4.11039	1.01806e-05	0.0278948	0.00639336	0.0413523	O24578; P14641; P18025; P18026; P22275; P49076; P49104; Q05737; Q41782; Q41783; Q41784; Q41803; Q41874; Q43695;
acetyl-CoA:L-glutamate N-acetyltransferase activity	1	15	0.420168	11.786	0.0823084	1	1	1	C0PF72;
glutamate N-acetyltransferase activity	1	13	0.420168	13.5979	0.0717365	1	1	1	C0PF72;
methione N-acyltransferase activity	1	15	0.420168	11.786	0.0823084	1	1	1	C0PF72;
acetylserotonin O-methyltransferase activity	1	6	0.420168	29.4356	0.0337705	1	1	1	Q06509;
proton-transporting ATP synthase activity, rotational mechanism	6	533	2.52101	1.97499	0.0864117	1	1	1	P00827; P00835; P05022; P05494; P0C1M0; P19023;
hydrogen ion transmembrane transporter activity	1	440	0.420168	0.402055	0.920542	1	1	1	P48186;
structural constituent of ribosome	19	3667	7.98319	0.908022	0.70432	1	1	1	O22424; O24413; O24415; O24573; O48557; O48558; P17788; P19950; P25460; P27923; P45633; P46252; P51421; P51425; Q05761; Q08066; Q08069; Q41852; Q9TJN6;
chaperone binding	1	21	0.420168	8.42019	0.11331	1	1	1	P05494;
beta-glucosidase activity	2	108	0.840336	3.25956	0.12685	1	1	1	P49235; Q41761;
inorganic diphosphatase activity	1	24	0.420168	7.3681	0.128418	1	1	1	O48556;
cysteine-type endopeptidase inhibitor activity	1	44	0.420168	4.01973	0.222789	1	1	1	P31726;
cinnamyl-alcohol dehydrogenase activity	1	42	0.420168	4.2111	0.213829	1	1	1	O24562;
sinapyl alcohol dehydrogenase activity	1	42	0.420168	4.2111	0.213829	1	1	1	O24562;
scopolin beta-glucosidase activity	2	87	0.840336	4.04626	0.0885998	1	1	1	P49235; Q41761;
fucosidase activity	1	2	0.420168	88.014	0.0113854	1	0.709001	1	P49235;
unfolded protein binding	2	117	0.840336	3.00884	0.144252	1	1	1	Q08277; Q9SP22;
rRNA binding	3	2319	1.2605	0.227348	0.999867	1	1	1	O22424; P25460; Q9TJN6;
single-stranded DNA binding	1	62	0.420168	2.8529	0.298987	1	1	1	B2LXS7;
helicase activity	6	89	2.52101	11.8267	1.27163e-05	0.0348426	0.00639336	0.0413523	F4IHS2; F4KBP5; Q41741; Q9LFN6; Q9FJR0; Q9SX04;
DIMBOA-glucoside oxygenase activity	1	1	0.420168	175.157	0.00570894	1	0.404844	1	Q84TC2;
TRIBOA-glucoside methyltransferase activity	1	1	0.420168	175.157	0.00570894	1	0.404844	1	B1P123;
2,4-dihydroxy-7-methoxy-2H-1,4-benzoxazin-3(4H)-one 2-D-glucosyltransferase activity	2	2	0.840336	175.157	3.24558e-05	0.088929	0.0111161	0.0718992	B4G072; Q8W2B7;
ATP-dependent RNA helicase activity	7	143	2.94118	8.58575	1.95718e-05	0.0536268	0.00766097	0.0495513	F4JAA5; Q9LZQ9; Q84W89; Q8H136; Q8RXK6; Q8W4R3; Q94A52;
3-hydroxyindolin-2-one monooxygenase activity	1	1	0.420168	175.157	0.00570894	1	0.404844	1	Q43250;
indolin-2-one monooxygenase activity	1	1	0.420168	175.157	0.00570894	1	0.404844	1	Q43255;
ferric iron binding	2	21	0.840336	16.757	0.00634511	1	0.43464	1	P29036; P29390;
chlorophyll binding	9	911	3.78151	1.73232	0.0791498	1	1	1	P04966; P04967; P05641; P06671; P12329; P27497; P48183; P48184; P48187;
caffeoyl-CoA O-methyltransferase activity	1	29	0.420168	6.09818	0.15303	1	1	1	Q9XGD5;
phosphoenolpyruvate carboxylase activity	2	27	0.840336	13.0346	0.0103698	1	0.660775	1	P04711; P51059;
cysteine synthase activity	1	27	0.420168	6.54973	0.143269	1	1	1	P80608;
catalase activity	1	41	0.420168	4.31378	0.209311	1	1	1	P18123;
cyclin-dependent protein serine/threonine kinase activity	1	52	0.420168	3.40142	0.257623	1	1	1	P23111;
RNA polymerase II carboxy-terminal domain kinase activity	1	43	0.420168	4.11319	0.218322	1	1	1	P23111;
protein disulfide oxidoreductase activity	1	153	0.420168	1.15619	0.58421	1	1	1	Q41864;
chalcone isomerase activity	1	50	0.420168	3.53745	0.249063	1	1	1	Q08704;
sucrose alpha-glucosidase activity	1	44	0.420168	4.01973	0.222789	1	1	1	P49174;
caffeate O-methyltransferase activity	1	22	0.420168	8.03762	0.118375	1	1	1	Q06509;
luteolin O-methyltransferase activity	1	3	0.420168	58.7735	0.0170296	1	0.972108	1	Q06509;
peptidyl-prolyl cis-trans isomerase activity	1	74	0.420168	2.39033	0.345605	1	1	1	P21569;
cyclosporin A binding	1	4	0.420168	44.1167	0.0226418	1	1	1	P21569;
electron transporter, transferring electrons within cytochrome b6/f complex of photosystem II activity	1	226	0.420168	0.782745	0.726767	1	1	1	P05642;
cyanate hydratase activity	1	13	0.420168	13.5979	0.0717365	1	1	1	B6TTW1;
NADPH binding	1	13	0.420168	13.5979	0.0717365	1	1	1	P52580;
uroporphyrinogen decarboxylase activity	1	7	0.420168	25.2365	0.0392874	1	1	1	O81220;
glutathione transferase activity	3	97	1.2605	5.43471	0.0182831	1	1	1	P04907; P12653; P46420;
glutathione binding	1	14	0.420168	12.6273	0.0770375	1	1	1	P46420;
3''-deamino-3''-oxonicotianamine reductase activity	1	6	0.420168	29.4356	0.0337705	1	1	1	B4F9A4;
dihydrofolate reductase activity	1	6	0.420168	29.4356	0.0337705	1	1	1	O81395;
thymidylate synthase activity	1	6	0.420168	29.4356	0.0337705	1	1	1	O81395;
translation elongation factor activity	1	147	0.420168	1.20337	0.569626	1	1	1	Q41803;
translation initiation factor activity	3	210	1.2605	2.51046	0.119329	1	1	1	P56330; Q41741; Q9XHR2;
phosphopyruvate hydratase activity	2	15	0.840336	23.4553	0.00324483	1	0.355634	1	P26301; P42895;
electron transporter, transferring electrons within the cyclic electron transport pathway of photosynthesis activity	5	632	2.10084	1.38848	0.294297	1	1	1	P05641; P05643; P48183; P48184; P48187;
ferroxidase activity	2	20	0.840336	17.5944	0.00576238	1	0.404844	1	P29036; P29390;
glyceraldehyde-3-phosphate dehydrogenase (NAD+) (phosphorylating) activity	3	37	1.2605	14.2454	0.00123691	1	0.154051	0.996406	P08735; Q09054; Q43247;
glyceraldehyde-3-phosphate dehydrogenase (NADP+) (phosphorylating) activity	1	16	0.420168	11.0499	0.0875494	1	1	1	P09315;
NAD+ binding	3	14	1.2605	37.6318	6.38398e-05	0.174921	0.0174921	0.113139	P08735; Q09054; Q43247;
phosphate ion binding	4	90	1.68067	7.80333	0.00180236	1	0.214716	1	P08735; P24993; Q09054; Q43247;
1,4-alpha-glucan branching enzyme activity	1	8	0.420168	22.0859	0.044773	1	1	1	Q08047;
1,4-alpha-glucan branching enzyme activity (using a glucosylated glycogenin as primer for glycogen synthesis)	1	8	0.420168	22.0859	0.044773	1	1	1	Q08047;
cation binding	1	11	0.420168	16.0679	0.0610432	1	1	1	Q08047;
glutamate-ammonia ligase activity	2	50	0.840336	7.03989	0.0332246	1	1	1	P38559; P38563;
3 iron, 4 sulfur cluster binding	1	25	0.420168	7.0735	0.133397	1	1	1	P23225;
glutamate synthase (ferredoxin) activity	1	10	0.420168	17.6731	0.0556507	1	1	1	P23225;
phosphoglycerate mutase activity	1	9	0.420168	19.6346	0.0502274	1	1	1	P30792;
thiamine pyrophosphate binding	3	35	1.2605	15.0592	0.00105069	1	0.148926	0.963254	Q05327; Q41768; Q41769;
cellulose 1,4-beta-cellobiosidase activity	1	1	0.420168	175.157	0.00570894	1	0.404844	1	P49235;
DIMBOA glucoside beta-D-glucosidase activity	2	7	0.840336	50.2232	0.000668819	1	0.122171	0.790203	P49235; Q41761;
galactosidase activity	1	1	0.420168	175.157	0.00570894	1	0.404844	1	P49235;
mannosidase activity	1	1	0.420168	175.157	0.00570894	1	0.404844	1	P49235;
xylanase activity	1	1	0.420168	175.157	0.00570894	1	0.404844	1	P49235;
betaine-homocysteine S-methyltransferase activity	1	9	0.420168	19.6346	0.0502274	1	1	1	Q9FUM8;
fructokinase activity	2	30	0.840336	11.7316	0.0127083	1	0.773792	1	Q6XZ78; Q6XZ79;
acetolactate synthase activity	2	23	0.840336	15.3005	0.00758727	1	0.507052	1	Q41768; Q41769;
inositol-3-phosphate synthase activity	1	16	0.420168	11.0499	0.0875494	1	1	1	Q9FPK7;
inositol-1,3,4-trisphosphate 6-kinase activity	1	18	0.420168	9.82277	0.097942	1	1	1	Q84Y01;
inositol tetrakisphosphate 1-kinase activity	1	17	0.420168	10.4002	0.0927605	1	1	1	Q84Y01;
inositol-1,3,4-trisphosphate 5-kinase activity	1	17	0.420168	10.4002	0.0927605	1	1	1	Q84Y01;
inositol tetrakisphosphate 6-kinase activity	1	1	0.420168	175.157	0.00570894	1	0.404844	1	Q84Y01;
inositol-1,3,4,5-tetrakisphosphate 3-phosphatase activity	1	1	0.420168	175.157	0.00570894	1	0.404844	1	Q84Y01;
adenylate kinase activity	1	18	0.420168	9.82277	0.097942	1	1	1	P43188;
1-acylglycerol-3-phosphate O-acyltransferase activity	1	15	0.420168	11.786	0.0823084	1	1	1	Q41745;
malate dehydrogenase (decarboxylating) (NAD+) activity	1	18	0.420168	9.82277	0.097942	1	1	1	P16243;
malate dehydrogenase (decarboxylating) (NADP+) activity	1	14	0.420168	12.6273	0.0770375	1	1	1	P16243;
oxaloacetate decarboxylase activity	1	17	0.420168	10.4002	0.0927605	1	1	1	P16243;
malate synthase activity	1	10	0.420168	17.6731	0.0556507	1	1	1	P49081;
L-malate dehydrogenase activity	1	31	0.420168	5.70487	0.162679	1	1	1	Q08062;
malate dehydrogenase (NADP+) activity	1	9	0.420168	19.6346	0.0502274	1	1	1	P15719;
NAD(P)+ transhydrogenase activity	1	3	0.420168	58.7735	0.0170296	1	0.972108	1	P15719;
methionine S-methyltransferase activity	1	4	0.420168	44.1167	0.0226418	1	1	1	Q8W519;
acireductone synthase activity	1	10	0.420168	17.6731	0.0556507	1	1	1	B4G0F3;
methylthioribulose 1-phosphate dehydratase activity	1	10	0.420168	17.6731	0.0556507	1	1	1	B4G0F3;
methylenetetrahydrofolate reductase (NAD(P)H) activity	1	4	0.420168	44.1167	0.0226418	1	1	1	Q9SE94;
S-methyl-5-thioribose-1-phosphate isomerase activity	1	11	0.420168	16.0679	0.0610432	1	1	1	B6TZD1;
oxidoreductase activity, acting on NAD(P)H	1	192	0.420168	0.921348	0.667724	1	1	1	P25709;
NADH dehydrogenase (ubiquinone) activity	1	1077	0.420168	0.164259	0.998064	1	1	1	P19124;
superoxide dismutase activity	4	72	1.68067	9.75389	0.000786061	1	0.134613	0.870678	P09233; P11428; P23345; P23346;
water channel activity	3	78	1.2605	6.75838	0.0102054	1	0.660775	1	O64964; Q84RL7; Q9ATM7;
DNA-directed 5'-3' RNA polymerase activity	1	592	0.420168	0.298826	0.967081	1	1	1	P10581;
porin activity	1	36	0.420168	4.91275	0.186328	1	1	1	P42057;
voltage-gated anion channel activity	1	22	0.420168	8.03762	0.118375	1	1	1	P42057;
phosphatidylinositol-4,5-bisphosphate binding	2	9	0.840336	39.0749	0.00113793	1	0.148926	0.963254	Q9FR39; P35081;
phenylalanine ammonia-lyase activity	1	51	0.420168	3.46811	0.253355	1	1	1	Q8VXG7;
tyrosine ammonia-lyase activity	1	1	0.420168	175.157	0.00570894	1	0.404844	1	Q8VXG7;
phosphoenolpyruvate carboxykinase (ATP) activity	1	5	0.420168	35.311	0.028222	1	1	1	Q9SLZ0;
DNA polymerase processivity factor activity	1	12	0.420168	14.7301	0.0664051	1	1	1	Q43266;
pyruvate decarboxylase activity	1	17	0.420168	10.4002	0.0927605	1	1	1	Q05327;
phosphotransferase activity, phosphate group as acceptor	1	5	0.420168	35.311	0.028222	1	1	1	Q195N6;
galacturan 1,4-alpha-galacturonidase activity	2	8	0.840336	43.9531	0.000888401	1	0.135234	0.874697	P26216; P35339;
phosphoglucomutase activity	2	13	0.840336	27.0611	0.00242865	1	0.277271	1	P93804; P93805;
actin monomer binding	3	18	1.2605	29.2738	0.000140716	0.385562	0.0350511	0.226711	Q9FR39; P35081; P35082;
N-acylphosphatidylethanolamine-specific phospholipase D activity	1	24	0.420168	7.3681	0.128418	1	1	1	Q43270;
phospholipase D activity	1	24	0.420168	7.3681	0.128418	1	1	1	Q43270;
pyruvate, phosphate dikinase activity	1	10	0.420168	17.6731	0.0556507	1	1	1	P11155;
proline-rich region binding	3	5	1.2605	105.234	1.8219e-06	0.004992	0.001664	0.0107628	Q9FR39; P35081; P35082;
adenylosuccinate synthase activity	1	22	0.420168	8.03762	0.118375	1	1	1	O24578;
ribulose-bisphosphate carboxylase activity	2	680	0.840336	0.517735	0.901928	1	1	1	P00874; P05348;
UDP-arabinopyranose mutase activity	1	11	0.420168	16.0679	0.0610432	1	1	1	P80607;
sucrose synthase activity	1	49	0.420168	3.60963	0.244746	1	1	1	P49036;
ADP-glucose-starch glucosyltransferase activity	1	17	0.420168	10.4002	0.0927605	1	1	1	P04713;
glycogen (starch) synthase activity	1	30	0.420168	5.89497	0.157868	1	1	1	P04713;
transketolase activity	1	9	0.420168	19.6346	0.0502274	1	1	1	Q7SIC9;
triose-phosphate isomerase activity	1	17	0.420168	10.4002	0.0927605	1	1	1	P12863;
tryptophan synthase activity	1	15	0.420168	11.786	0.0823084	1	1	1	P43284;
anthocyanidin 3-O-glucosyltransferase activity	1	18	0.420168	9.82277	0.097942	1	1	1	P16166;
proton-transporting ATPase activity, rotational mechanism	1	40	0.420168	4.4216	0.204766	1	1	1	P49087;

## Sheet: Biological process
Analysis: Biological process
Dataset name: BC
Number of proteins in the dataset: 238
Number of proteins in the dataset (which are available in Biological process database) :191
Number of proteins in background: 41689
Is analysis quantitative: No
						Corrected p-values
Biological process	No. of genes in the dataset	No.of genes in the background dataset	Percentage of proteins	Fold enrichment	P-value (Hypergeometric test)	Bonferroni method	BH method	Q-value (Storey-Tibshirani method)
auxin-activated signaling pathway	1	328	0.420168	0.539338	0.84822	1	1	1	P13689;
negative regulation of protein serine/threonine kinase activity	2	3	0.840336	116.965	9.7e-05	0.351237	0.0250884	0.164934	P49106; Q01526;
regulation of gene expression	4	113	1.68067	6.21518	0.0041024	1	0.64586	1	P49106; Q01526; Q9LFN6; Q94A52;
cold acclimation	1	53	0.420168	3.33726	0.261867	1	1	1	P18123;
ethylene-activated signaling pathway	1	195	0.420168	0.907175	0.673409	1	1	1	F4IHS2;
response to cadmium ion	1	309	0.420168	0.5725	0.830636	1	1	1	Q9SU63;
defense response to bacterium	1	377	0.420168	0.46924	0.885623	1	1	1	Q9FJR0;
biosynthetic process	1	81	0.420168	2.18378	0.37136	1	1	1	Q8W519;
cellular response to iron ion	1	53	0.420168	3.33726	0.261867	1	1	1	B6TZD1;
cell division	1	328	0.420168	0.539338	0.84822	1	1	1	P23111;
response to cytokinin	1	193	0.420168	0.916575	0.66963	1	1	1	P04711;
defense response	3	1188	1.2605	0.443785	0.967215	1	1	1	B2LXS7; F4IHS2; P29022;
response to auxin	1	233	0.420168	0.75923	0.73756	1	1	1	P18123;
response to oxidative stress	4	334	1.68067	2.10286	0.125161	1	1	1	A5H453; A5H8G4; P09233; P18123;
response to wounding	2	234	0.840336	1.50449	0.386504	1	1	1	F4IHS2; Q9FJR0;
regulation of translation	3	114	1.2605	4.62434	0.0278031	1	1	1	P56330; Q8RXK6; Q94A52;
flower development	1	270	0.420168	0.655191	0.787933	1	1	1	F4IHS2;
transcription, DNA-templated	7	3302	2.94118	0.371848	0.999616	1	1	1	F4IHS2; F4JAA5; P10581; P19862; Q9LEF5; Q9M4U4; Q9M4U5;
carbohydrate metabolic process	7	454	2.94118	2.70445	0.0160286	1	1	1	P15719; P26216; P35339; P49174; P49235; Q08062; Q41761;
methionine metabolic process	1	23	0.420168	7.68831	0.123411	1	1	1	Q9SE94;
multicellular organism development	1	469	0.420168	0.377195	0.932821	1	1	1	A1Y2B7;
response to salt stress	1	465	0.420168	0.380439	0.931247	1	1	1	B6TTW1;
anthocyanin-containing compound biosynthetic process	1	73	0.420168	2.42307	0.341841	1	1	1	P16166;
phenylpropanoid biosynthetic process	2	15	0.840336	23.4553	0.00324483	1	0.53407	1	Q56YU0; Q8VXG7;
metabolic process	2	331	0.840336	1.06361	0.565042	1	1	1	B4G072; Q8W2B7;
viral process	1	48	0.420168	3.68482	0.240405	1	1	1	Q8RXK6;
tetrahydrofolate interconversion	1	22	0.420168	8.03762	0.118375	1	1	1	Q9SE94;
transport	2	1057	0.840336	0.333076	0.984266	1	1	1	P19124; P25709;
flavonoid biosynthetic process	1	253	0.420168	0.699214	0.766111	1	1	1	Q08704;
pentose-phosphate shunt	1	33	0.420168	5.35923	0.17222	1	1	1	P12863;
oxidation-reduction process	1	439	0.420168	0.402971	0.920081	1	1	1	O23888;
mRNA transport	2	50	0.840336	7.03989	0.0332246	1	1	1	Q8RXK6; Q94A52;
protein transport	3	476	1.2605	1.10758	0.512142	1	1	1	P49076; P49104; Q05737;
protein homotetramerization	4	20	1.68067	35.1013	4.67024e-06	0.016911	0.00327073	0.0215022	P09233; P18123; Q84RL7; Q9XF59;
tricarboxylic acid cycle	4	159	1.68067	4.41719	0.0133456	1	1	1	P04711; P49081; P51059; Q08062;
lipid transport	1	159	0.420168	1.11256	0.598303	1	1	1	P19656;
transmembrane transport	1	87	0.420168	2.03319	0.39263	1	1	1	P04709;
lipid catabolic process	1	225	0.420168	0.786223	0.72519	1	1	1	Q43270;
photosynthetic electron transport chain	2	354	0.840336	0.994505	0.601584	1	1	1	P05643; P69388;
protein stabilization	1	105	0.420168	1.68468	0.452235	1	1	1	P24993;
response to iron ion starvation	1	17	0.420168	10.4002	0.0927605	1	1	1	B4F9A4;
circadian rhythm	1	91	0.420168	1.94383	0.40641	1	1	1	P18123;
response to hydrogen peroxide	1	75	0.420168	2.35846	0.349348	1	1	1	P12653;
cellular iron ion homeostasis	2	22	0.840336	15.9957	0.00695351	1	1	1	P29036; P29390;
response to reactive oxygen species	3	43	1.2605	12.2581	0.00191573	1	0.365099	1	P09233; P12653; P18123;
response to salicylic acid	1	146	0.420168	1.21162	0.567146	1	1	1	P12653;
response to gibberellin	1	92	0.420168	1.92271	0.409806	1	1	1	Q8VXG7;
response to heat	1	185	0.420168	0.956208	0.654074	1	1	1	Q43247;
iron-sulfur cluster assembly	1	58	0.420168	3.04961	0.282724	1	1	1	B6TB21;
seed development	1	81	0.420168	2.18378	0.37136	1	1	1	Q84Y01;
abscisic acid biosynthetic process	1	39	0.420168	4.53494	0.200196	1	1	1	O23888;
sugar mediated signaling pathway	1	30	0.420168	5.89497	0.157868	1	1	1	Q9FJR0;
regulation of transcription, DNA-templated	9	1761	3.78151	0.896168	0.678768	1	1	1	B2LXS7; F4IHS2; F4JAA5; P19862; P27347; Q9FYS5; Q9LEF5; Q9M4U4; Q9M4U5;
unidimensional cell growth	1	86	0.420168	2.05683	0.389135	1	1	1	O64964;
actin filament depolymerization	1	35	0.420168	5.05307	0.181652	1	1	1	Q41764;
response to hypoxia	1	35	0.420168	5.05307	0.181652	1	1	1	Q94A52;
response to light stimulus	2	192	0.840336	1.83357	0.299725	1	1	1	P08735; P09315;
cellular response to nitric oxide	1	24	0.420168	7.3681	0.128418	1	1	1	B6TZD1;
regulation of defense response to fungus	1	24	0.420168	7.3681	0.128418	1	1	1	F4IHS2;
glyoxylate cycle	1	43	0.420168	4.11319	0.218322	1	1	1	P49081;
regulation of stomatal closure	1	18	0.420168	9.82277	0.097942	1	1	1	B6TVL4;
photosynthesis	10	2977	4.20168	0.588952	0.977893	1	1	1	O65107; P04711; P04966; P04967; P05642; P11155; P24993; P46617; P51059; Q41048;
glutamine metabolic process	1	53	0.420168	3.33726	0.261867	1	1	1	P23225;
tetrahydrofolate biosynthetic process	1	21	0.420168	8.42019	0.11331	1	1	1	O81395;
ethanol oxidation	1	5	0.420168	35.311	0.028222	1	1	1	P93629;
protein-chromophore linkage	10	1046	4.20168	1.6762	0.0787844	1	1	1	P04966; P04967; P05641; P06671; P12329; P19862; P27497; P48183; P48184; P48187;
mRNA processing	3	932	1.2605	0.565682	0.903117	1	1	1	Q9LZQ9; Q8RXK6; Q94A52;
red, far-red light phototransduction	1	105	0.420168	1.68468	0.452235	1	1	1	P19862;
cell wall organization	7	543	2.94118	2.26119	0.0372952	1	1	1	P0C1Y5; P26216; P35339; P58738; P80607; Q07154; Q1ZYQ8;
vesicle-mediated transport	1	124	0.420168	1.42656	0.508842	1	1	1	P49076;
cell wall macromolecule catabolic process	1	76	0.420168	2.32743	0.353069	1	1	1	P29022;
chitin catabolic process	1	106	0.420168	1.66879	0.45537	1	1	1	P29022;
polysaccharide catabolic process	2	118	0.840336	2.98335	0.146216	1	1	1	P29022; P55005;
glucose metabolic process	6	78	2.52101	13.4943	5.92224e-06	0.0214444	0.00327073	0.0215022	P08735; P09315; P93804; P93805; Q09054; Q43247;
DNA repair	2	195	0.840336	1.80537	0.306027	1	1	1	B2LXS7; Q9LEF5;
gene silencing by RNA	1	64	0.420168	2.76376	0.30698	1	1	1	A1Y2B7;
posttranscriptional gene silencing	1	9	0.420168	19.6346	0.0502274	1	1	1	F4JAA5;
photorespiration	2	672	0.840336	0.523898	0.898235	1	1	1	P00874; P05348;
cytokinin-activated signaling pathway	1	133	0.420168	1.33004	0.533583	1	1	1	P49235;
cell cycle	2	296	0.840336	1.18937	0.504973	1	1	1	P23111; Q9SX04;
lysine biosynthetic process via diaminopimelate	2	29	0.840336	12.136	0.0119054	1	1	1	P49079; P49080;
threonine biosynthetic process	2	12	0.840336	29.3143	0.00206276	1	0.373463	1	P49079; P49080;
methionine biosynthetic process	3	26	1.2605	20.2699	0.00043349	1	0.0970656	0.638121	P49079; P49080; Q9FUM8;
potassium ion transport	1	51	0.420168	3.46811	0.253355	1	1	1	F4JAA5;
auxin biosynthetic process	1	37	0.420168	4.78001	0.190977	1	1	1	O23888;
glycolytic process	8	203	3.36134	6.91101	2.40021e-05	0.0869114	0.00965683	0.0634851	P08440; P08735; P12863; P26301; P30792; P42895; Q09054; Q43247;
gluconeogenesis	2	60	0.840336	5.86677	0.0462677	1	1	1	P12863; Q9SLZ0;
covalent chromatin modification	3	132	1.2605	3.9938	0.0402416	1	1	1	F4KBP5; Q9M4U4; Q9M4U5;
response to anoxia	4	10	1.68067	70.1676	2.11728e-07	0.000766666	0.000383333	0.00252008	O24413; O24573; P08440; Q43247;
sucrose biosynthetic process	1	39	0.420168	4.53494	0.200196	1	1	1	P08440;
leaf development	1	123	0.420168	1.43816	0.506014	1	1	1	O64964;
vacuole organization	1	23	0.420168	7.68831	0.123411	1	1	1	O64964;
nucleosome assembly	1	90	0.420168	1.96543	0.402995	1	1	1	Q9FYS5;
response to nitrate	1	21	0.420168	8.42019	0.11331	1	1	1	P04711;
jasmonic acid mediated signaling pathway	1	48	0.420168	3.68482	0.240405	1	1	1	Q9FJR0;
cell redox homeostasis	2	288	0.840336	1.2224	0.490511	1	1	1	P52588; Q41864;
protein folding	4	167	1.68067	4.2056	0.015712	1	1	1	P21569; P29185; Q08277; Q9SP22;
hydrogen peroxide catabolic process	3	225	1.2605	2.3431	0.13842	1	1	1	A5H453; A5H8G4; P18123;
small GTPase mediated signal transduction	1	51	0.420168	3.46811	0.253355	1	1	1	P49076;
response to stress	2	66	0.840336	5.3335	0.0548476	1	1	1	Q08277; Q41739;
arginine biosynthetic process	1	37	0.420168	4.78001	0.190977	1	1	1	C0PF72;
cellular response to ethylene stimulus	1	30	0.420168	5.89497	0.157868	1	1	1	B6TZD1;
response to herbicide	7	180	2.94118	6.821	8.45862e-05	0.306287	0.0235605	0.15489	P04907; P09233; P12653; P46420; P48183; Q41768; Q41769;
sucrose metabolic process	1	66	0.420168	2.68002	0.314883	1	1	1	P49036;
regulation of gene expression, epigenetic	1	11	0.420168	16.0679	0.0610432	1	1	1	F4IHS2;
melatonin biosynthetic process	1	10	0.420168	17.6731	0.0556507	1	1	1	Q06509;
lignin biosynthetic process	3	120	1.2605	4.39314	0.0316821	1	1	1	O24562; Q06509; Q9XGD5;
de-etiolation	1	15	0.420168	11.786	0.0823084	1	1	1	B6TVL4;
translation	15	3603	6.30252	0.729695	0.92531	1	1	1	O22424; O48557; O48558; P17788; P19950; P25460; P27923; P45633; P51421; P51425; Q05761; Q08066; Q08069; Q41852; Q9TJN6;
one-carbon metabolic process	1	126	0.420168	1.40392	0.514451	1	1	1	O81395;
protein arginylation	1	3	0.420168	58.7735	0.0170296	1	1	1	Q8VXG7;
cellular response to DNA damage stimulus	1	48	0.420168	3.68482	0.240405	1	1	1	Q9LFN6;
mRNA splicing, via spliceosome	1	96	0.420168	1.8426	0.423199	1	1	1	Q9LFN6;
ATP synthesis coupled proton transport	7	964	2.94118	1.27369	0.313338	1	1	1	P00827; P00835; P05022; P05494; P0C1M0; P19023; P48186;
ATP hydrolysis coupled proton transport	1	224	0.420168	0.789733	0.723604	1	1	1	P49087;
photosynthetic electron transport in photosystem I	1	140	0.420168	1.26354	0.551965	1	1	1	P11601;
photosynthetic electron transport in photosystem II	4	545	1.68067	1.28874	0.377927	1	1	1	P05641; P48183; P48184; P48187;
regulation of DNA replication	1	18	0.420168	9.82277	0.097942	1	1	1	Q43266;
microtubule nucleation	1	14	0.420168	12.6273	0.0770375	1	1	1	Q41874;
isoleucine biosynthetic process	2	40	0.840336	8.79942	0.0219541	1	1	1	Q41768; Q41769;
valine biosynthetic process	2	35	0.840336	10.0561	0.0170615	1	1	1	Q41768; Q41769;
cytoplasmic mRNA processing body assembly	1	12	0.420168	14.7301	0.0664051	1	1	1	Q8RXK6;
DNA replication	2	103	0.840336	3.41777	0.117416	1	1	1	Q43266; Q9LEF5;
ATP-dependent chromatin remodeling	1	6	0.420168	29.4356	0.0337705	1	1	1	F4IHS2;
organ boundary specification between lateral organs and the meristem	1	8	0.420168	22.0859	0.044773	1	1	1	F4IHS2;
rRNA processing	2	68	0.840336	5.17666	0.0578227	1	1	1	Q8H136; Q8W4R3;
RNA splicing	2	126	0.840336	2.79394	0.162114	1	1	1	Q9LZQ9; Q94A52;
RNA processing	1	33	0.420168	5.35923	0.17222	1	1	1	Q9LZQ9;
mRNA export from nucleus	1	25	0.420168	7.0735	0.133397	1	1	1	Q9LFN6;
respiratory electron transport chain	1	116	0.420168	1.52494	0.485755	1	1	1	P05642;
iron ion transport	2	24	0.840336	14.6633	0.00824608	1	1	1	P29036; P29390;
salicylic acid mediated signaling pathway	1	20	0.420168	8.84099	0.108217	1	1	1	Q9FJR0;
chlorophyll biosynthetic process	1	135	0.420168	1.31033	0.538911	1	1	1	O81220;
carbon fixation	2	36	0.840336	9.77686	0.0179979	1	1	1	P04711; P51059;
response to ammonium ion	1	11	0.420168	16.0679	0.0610432	1	1	1	P04711;
cysteine biosynthetic process from serine	1	36	0.420168	4.91275	0.186328	1	1	1	P80608;
cellular response to calcium ion	1	3	0.420168	58.7735	0.0170296	1	1	1	B6TVL4;
protein heterotetramerization	2	8	0.840336	43.9531	0.000888401	1	0.178717	1	Q84RL7; Q9XF59;
response to xenobiotic stimulus	4	7	1.68067	100.197	3.57673e-08	0.000129514	0.000129514	0.000851437	P09233; P12653; P18123; P46420;
photosynthesis, light harvesting	3	75	1.2605	7.02868	0.00917186	1	1	1	P06671; P12329; P27497;
starch biosynthetic process	5	111	2.10084	7.905	0.000455707	1	0.0970656	0.638121	P04713; P55240; Q08047; Q6XZ78; Q6XZ79;
DNA replication initiation	1	39	0.420168	4.53494	0.200196	1	1	1	Q9SX04;
CDP-diacylglycerol biosynthetic process	1	31	0.420168	5.70487	0.162679	1	1	1	Q41745;
phospholipid biosynthetic process	1	37	0.420168	4.78001	0.190977	1	1	1	Q9FPK7;
glycerol ether metabolic process	1	83	0.420168	2.13117	0.378531	1	1	1	Q41864;
cellulose biosynthetic process	1	91	0.420168	1.94383	0.40641	1	1	1	P80607;
protein refolding	2	39	0.840336	9.02498	0.0209341	1	1	1	P29185; Q43298;
regulation of endosperm development	1	14	0.420168	12.6273	0.0770375	1	1	1	Q9FYS5;
regulation of jasmonic acid mediated signaling pathway	1	45	0.420168	3.93042	0.227231	1	1	1	F4IHS2;
flavonol biosynthetic process	1	12	0.420168	14.7301	0.0664051	1	1	1	Q06509;
reductive pentose-phosphate cycle	4	734	1.68067	0.956905	0.605403	1	1	1	P00874; P05348; P09315; Q7SIC9;
nuclear-transcribed mRNA catabolic process, nonsense-mediated decay	4	29	1.68067	24.2116	2.19885e-05	0.0796202	0.00965683	0.0634851	Q8H136; Q8W4R3; Q94A52; Q9FJR0;
RNA secondary structure unwinding	6	117	2.52101	8.99659	5.99286e-05	0.217002	0.0197274	0.12969	Q9LFN6; Q84W89; Q8H136; Q8RXK6; Q8W4R3; Q94A52;
cyanate catabolic process	1	5	0.420168	35.311	0.028222	1	1	1	B6TTW1;
protoporphyrinogen IX biosynthetic process	1	55	0.420168	3.21593	0.270281	1	1	1	O81220;
ribosome biogenesis	1	56	0.420168	3.15851	0.274453	1	1	1	O24573;
cellular response to zinc ion starvation	1	5	0.420168	35.311	0.028222	1	1	1	B4F9A4;
siderophore biosynthetic process	1	6	0.420168	29.4356	0.0337705	1	1	1	B4F9A4;
dTMP biosynthetic process	1	6	0.420168	29.4356	0.0337705	1	1	1	O81395;
glycine biosynthetic process	1	20	0.420168	8.84099	0.108217	1	1	1	O81395;
thiamine biosynthetic process	1	38	0.420168	4.65425	0.1956	1	1	1	Q41739;
microtubule-based process	8	120	3.36134	11.6907	4.86297e-07	0.00176088	0.00058696	0.00385875	P14641; P18025; P18026; P22275; Q41782; Q41783; Q41784; Q43695;
translational elongation	3	18	1.2605	29.2738	0.000140716	0.509533	0.0339689	0.223315	O24413; O24415; P46252;
regulation of actin cytoskeleton organization	3	6	1.2605	87.724	3.6284e-06	0.0131384	0.00327073	0.0215022	Q9FR39; P35081; P35082;
regulation of ethylene-activated signaling pathway	1	6	0.420168	29.4356	0.0337705	1	1	1	F4IHS2;
water transport	1	12	0.420168	14.7301	0.0664051	1	1	1	O64964;
sexual reproduction	4	39	1.68067	18.0051	7.28125e-05	0.263654	0.0219712	0.144441	P0C1Y5; P58738; Q07154; Q1ZYQ8;
L-phenylalanine catabolic process	1	60	0.420168	2.94798	0.290902	1	1	1	Q8VXG7;
malate metabolic process	2	44	0.840336	7.99965	0.026234	1	1	1	P15719; Q08062;
response to redox state	1	3	0.420168	58.7735	0.0170296	1	1	1	P15719;
cytoplasmic microtubule organization	1	13	0.420168	13.5979	0.0717365	1	1	1	Q41874;
carbohydrate phosphorylation	1	3	0.420168	58.7735	0.0170296	1	1	1	Q6XZ78;
G-protein coupled receptor signaling pathway	1	16	0.420168	11.0499	0.0875494	1	1	1	P49178;
glutamine biosynthetic process	2	46	0.840336	7.65192	0.0284901	1	1	1	P38559; P38563;
L-glutamate biosynthetic process	1	14	0.420168	12.6273	0.0770375	1	1	1	P23225;
glucose catabolic process	1	11	0.420168	16.0679	0.0610432	1	1	1	P30792;
long-day photoperiodism	1	4	0.420168	44.1167	0.0226418	1	1	1	Q9FJR0;
nuclear-transcribed mRNA catabolic process, 3'-5' exonucleolytic nonsense-mediated decay	1	3	0.420168	58.7735	0.0170296	1	1	1	F4JAA5;
inositol biosynthetic process	1	23	0.420168	7.68831	0.123411	1	1	1	Q9FPK7;
cellular response to sulfur starvation	1	8	0.420168	22.0859	0.044773	1	1	1	P52580;
myo-inositol hexakisphosphate biosynthetic process	1	16	0.420168	11.0499	0.0875494	1	1	1	Q84Y01;
inositol trisphosphate metabolic process	1	20	0.420168	8.84099	0.108217	1	1	1	Q84Y01;
phosphate-containing compound metabolic process	1	15	0.420168	11.786	0.0823084	1	1	1	O48556;
nuclear migration	3	7	1.2605	75.2099	6.32288e-06	0.0228951	0.00327073	0.0215022	Q9FR39; P35081; P35082;
response to cycloheximide	1	7	0.420168	25.2365	0.0392874	1	1	1	Q8VXG7;
pyruvate metabolic process	1	18	0.420168	9.82277	0.097942	1	1	1	P11155;
anion transport	1	9	0.420168	19.6346	0.0502274	1	1	1	P42057;
L-methionine salvage from methylthioadenosine	2	43	0.840336	8.18565	0.0251346	1	1	1	B4G0F3; B6TZD1;
ribosome assembly	1	10	0.420168	17.6731	0.0556507	1	1	1	Q08069;
cinnamic acid biosynthetic process	1	52	0.420168	3.40142	0.257623	1	1	1	Q8VXG7;
negative regulation of DNA recombination	1	5	0.420168	35.311	0.028222	1	1	1	B2LXS7;
response to potassium ion	1	3	0.420168	58.7735	0.0170296	1	1	1	F4JAA5;
phosphatidylcholine metabolic process	1	21	0.420168	8.42019	0.11331	1	1	1	Q43270;
detection of visible light	1	39	0.420168	4.53494	0.200196	1	1	1	P19862;
protein-tetrapyrrole linkage	1	36	0.420168	4.91275	0.186328	1	1	1	P19862;
sequestering of actin monomers	2	14	0.840336	25.1295	0.00282278	1	0.486728	1	Q9FR39; P35081;
phospholipase C-inhibiting G-protein coupled receptor signaling pathway	2	2	0.840336	175.157	3.24558e-05	0.117523	0.0117523	0.0772607	Q9FR39; P35081;
'de novo' AMP biosynthetic process	1	22	0.420168	8.03762	0.118375	1	1	1	O24578;
ATP metabolic process	1	24	0.420168	7.3681	0.128418	1	1	1	P49087;

## Sheet: Protein domain
Analysis: Protein domain
Dataset name: BC
Number of proteins in the dataset: 238
Number of proteins in the dataset (which are available in Protein domain database) :84
Number of proteins in background: 41689
Is analysis quantitative: No
						Corrected p-values
Protein domain	No. of genes in the dataset	No.of genes in the background dataset	Percentage of proteins	Fold enrichment	P-value (Hypergeometric test)	Bonferroni method	BH method	Q-value (Storey-Tibshirani method)
AAI	2	229	0.840336	1.53733	0.376383	1	1	1	O82106; P19656;
PKS_ER	1	65	0.420168	2.72124	0.310943	1	1	1	O24562;
14_3_3	2	59	0.840336	5.96619	0.0448903	1	1	1	P49106; Q01526;
Glyco_32	1	47	0.420168	3.7632	0.236039	1	1	1	P49174;
WD40	1	198	0.420168	0.89343	0.678997	1	1	1	P49178;
S_TKc	2	857	0.840336	0.410806	0.957658	1	1	1	P23111; P49101;
AAA	3	714	1.2605	0.738395	0.776206	1	1	1	P00827; P19023; Q9SX04;
ACTIN	1	92	0.420168	1.92271	0.409806	1	1	1	P02582;
Inhibitor_I29	1	48	0.420168	3.68482	0.240405	1	1	1	Q10717;
Pept_C1	1	60	0.420168	2.94798	0.290902	1	1	1	Q10717;
ADF	1	31	0.420168	5.70487	0.162679	1	1	1	Q41764;
PbH1	2	28	0.840336	12.5692	0.0111258	1	0.63215	1	P26216; P35339;
C2	1	73	0.420168	2.42307	0.341841	1	1	1	Q43270;
ChtBD1	1	76	0.420168	2.32743	0.353069	1	1	1	P29022;
HATPase_c	2	92	0.840336	3.82637	0.0973578	1	1	1	P19862; Q08277;
HisKA	1	71	0.420168	2.49131	0.334249	1	1	1	P19862;
AT_hook	1	13	0.420168	13.5979	0.0717365	1	1	1	Q9FYS5;
Ald_Xan_dh_C	1	14	0.420168	12.6273	0.0770375	1	1	1	O23888;
CO_deh_flav_C	1	14	0.420168	12.6273	0.0770375	1	1	1	O23888;
PHD	1	80	0.420168	2.21108	0.367743	1	1	1	F4KBP5;
EFh	1	270	0.420168	0.655191	0.787933	1	1	1	P49101;
RRM	2	196	0.840336	1.79616	0.308125	1	1	1	P10979; Q6JB11;
Aamy	1	31	0.420168	5.70487	0.162679	1	1	1	Q08047;
DEXDc	11	221	4.62185	8.72573	6.95612e-08	4.34758e-05	1.13787e-05	7.03088e-05	F4IHS2; F4JAA5; F4KBP5; Q9LZQ9; Q41741; Q9LFN6; Q84W89; Q8H136; Q8RXK6; Q8W4R3; Q94A52;
HELICc	11	222	4.62185	8.68643	7.28235e-08	4.55147e-05	1.13787e-05	7.03088e-05	F4IHS2; F4JAA5; F4KBP5; Q9LZQ9; Q41741; Q9LFN6; Q84W89; Q8H136; Q8RXK6; Q8W4R3; Q94A52;
QLQ	1	24	0.420168	7.3681	0.128418	1	1	1	F4IHS2;
Catalase	1	41	0.420168	4.31378	0.209311	1	1	1	P18123;
SnAC	1	3	0.420168	58.7735	0.0170296	1	0.818733	1	F4IHS2;
CHROMO	1	23	0.420168	7.68831	0.123411	1	1	1	F4KBP5;
DUF1087	1	3	0.420168	58.7735	0.0170296	1	0.818733	1	F4KBP5;
PINT	1	22	0.420168	8.03762	0.118375	1	1	1	Q9XHR2;
Cyanate_lyase	1	13	0.420168	13.5979	0.0717365	1	1	1	B6TTW1;
CY	1	25	0.420168	7.0735	0.133397	1	1	1	P31726;
WW	1	12	0.420168	14.7301	0.0664051	1	1	1	Q8H136;
HA2	1	20	0.420168	8.84099	0.108217	1	1	1	Q9LZQ9;
UBQ	1	78	0.420168	2.26776	0.360448	1	1	1	P27923;
Transket_pyr	1	33	0.420168	5.35923	0.17222	1	1	1	Q7SIC9;
DPBB_1	4	98	1.68067	7.16639	0.00245929	1	0.192132	1	P0C1Y5; P58738; Q07154; Q1ZYQ8;
GAF	1	65	0.420168	2.72124	0.310943	1	1	1	P19862;
Enolase_C	2	13	0.840336	27.0611	0.00242865	1	0.192132	1	P26301; P42895;
Enolase_N	2	13	0.840336	27.0611	0.00242865	1	0.192132	1	P26301; P42895;
Tubulin	9	124	3.78151	12.7261	4.44323e-08	2.77702e-05	1.13787e-05	7.03088e-05	P14641; P18025; P18026; P22275; Q41782; Q41783; Q41784; Q41874; Q43695;
Tubulin_C	9	124	3.78151	12.7261	4.44323e-08	2.77702e-05	1.13787e-05	7.03088e-05	P14641; P18025; P18026; P22275; Q41782; Q41783; Q41784; Q41874; Q43695;
Gp_dh_N	4	50	1.68067	14.0447	0.000194091	0.121307	0.0242613	0.149911	P08735; P09315; Q09054; Q43247;
Gln-synt_C	2	47	0.840336	7.48914	0.0296463	1	1	1	P38559; P38563;
PlsC	1	32	0.420168	5.52665	0.167463	1	1	1	Q41745;
H15	1	26	0.420168	6.80154	0.138347	1	1	1	Q9FYS5;
H2A	1	60	0.420168	2.94798	0.290902	1	1	1	P40280;
H2B	1	62	0.420168	2.8529	0.298987	1	1	1	P54348;
H3	1	46	0.420168	3.84499	0.231647	1	1	1	P69246;
H4	1	19	0.420168	9.30606	0.103094	1	1	1	Q41811;
DSHCT	1	4	0.420168	44.1167	0.0226418	1	0.943407	1	F4JAA5;
HMG	2	25	0.840336	14.077	0.00892965	1	0.558103	1	P27347; Q9LEF5;
malic	1	18	0.420168	9.82277	0.097942	1	1	1	P16243;
Malic_M	1	18	0.420168	9.82277	0.097942	1	1	1	P16243;
MCM	1	26	0.420168	6.80154	0.138347	1	1	1	Q9SX04;
KOW	1	32	0.420168	5.52665	0.167463	1	1	1	O22424;
Aldolase_II	1	10	0.420168	17.6731	0.0556507	1	1	1	B4G0F3;
PAS	1	46	0.420168	3.84499	0.231647	1	1	1	P19862;
PLDc	1	24	0.420168	7.3681	0.128418	1	1	1	Q43270;
PROF	5	183	2.10084	4.79501	0.00413644	1	0.287253	1	A4KA61; A4KA58; Q9FR39; P35081; P35082;
Adenylsucc_synt	1	22	0.420168	8.03762	0.118375	1	1	1	O24578;
S4	1	246	0.420168	0.719109	0.756488	1	1	1	O22424;
Ribosomal_S27	1	13	0.420168	13.5979	0.0717365	1	1	1	P27923;
RuBisCO_small	1	128	0.420168	1.38199	0.519996	1	1	1	P05348;
Ribosomal_L2	1	148	0.420168	1.19524	0.572092	1	1	1	P17788;
Ribosomal_L2_C	1	148	0.420168	1.19524	0.572092	1	1	1	P17788;
Ribosomal_L19e	1	4	0.420168	44.1167	0.0226418	1	0.943407	1	Q08066;
Ribosomal_S15	1	108	0.420168	1.63789	0.461587	1	1	1	Q05761;
Ribosomal_S13_N	1	7	0.420168	25.2365	0.0392874	1	1	1	Q05761;
Rtt106	1	9	0.420168	19.6346	0.0502274	1	1	1	Q9LEF5;
